# Supplementary material for: HIV-1 molecular transmission clusters in nine European countries and Canada: association with demographic and clinical factors
Source: BMC Med. 2019 Jan 8;17:4. doi: 10.1186/s12916-018-1241-1 (PMC6323837; doi:10.1186/s12916-018-1241-1)
Supplement: Supplementary file 4 — Study sequences. (XLS 7720 kb) [file 12916_2018_1241_MOESM4_ESM.xls]

## Sheet: Sheet1
>AUT-110115647
AAGGAAGCTCTATTAGATACAGGAGCAGATGATACAGTATTAGAAGAAATAGATTTGCCAGGAAGATGGAGACCAAAAATGATAGGGGGAATTGGAGGTTTTATCAAAGTAAGACAGTATGATCAGGTACCCATAGAAATTTGTGGACATAAAGCTATAGGTACAGTATTAGTAGGACCTACACCTGTCAACATAATTGGAAGAAATCTGTTGACTCAGCTTGGTTGCACTTTAAATTTTGAAATGGAAAAGGAAGGAAAAATTTCAAAAATTGGGCCTGAAAATCCATACAATACTCCAGTATTTGCCATAAAGAAAAAGGACAGTACTAAATGGAGAAAATTGGTAGATTTCAGAGAACTTAAGAGAACTCAAGACTTCTGGGAAGTTCAATTAGGA…
>AUT-110118332
AAGGAAGCTCTATTAGATACAGGAGCAGATGATACAGTATTAGAAGAAATGAATTTGCCAGGAAAATGGAAACCAAAAATGATAGGGGGAATTGGAGGWTTTATCAAAGTAAGACAGTATGATCAGATACCCATAGAAATCTGTGGGCATAAAGCKGTAGGTACAGTTTTAGTAGGACCTACACCTGTCAACATAATTGGAAGAAATCTGTTGACTCAGCTTGGATGCACTTTAAATTTTGAAATGGAAAAGGAAGGAAAAATTTCAAAAATTGGGCCTGAAAATCCATACAATACTCCAGTTTTTGCCATAAAGAAAAAGGACAGTACTAAATGGAGAAAATTAGTAGATTTCAGAGAACTTAAGAGAACTCAAGACTTCTGGGAAGTTCAATTAGGA…
>AUT-110118799
AAAGAAGCYCTRTTAGATACAGGAGCAGATGATACAGTATTAGAAGAAATGWGTTTACCAGGGAGRTGGAAACCAAAAATGATAGGGGGAATTGGAGGTTTTATCAAAGTAAGACAGTATGATCAGATACAAGTAGAAATATGTGGACATAAAGCTATAGGTACAGTATTARTAGGACCTACACCTGTCAACATAATTGGAAGAAATCTGTTGACTCAGATTGGTTGCACTTTAAATTTTGAAATGGAAAAGGAAGGGAAAATTTCAAAAATTGGGCCTGAAAAYCCATACAATACTCCAGTATTTGCCATAAAGAAAAAAGATGGTACTAAATGGAGAAAATTAGTAGATTTCAGRGAACTTAAGAGAACTCAAGACTTCTGGGAAGTTCAATTAGGG…
>AUT-110118802
AAAGAAGCTCTATTAGATACAGGAGCAGATGATACAGTATTAGAAGAAATGRATTTGCCAGGAAGATGGAAACCAAAAATGATAGGGGGAATTGGAGGTTTTATCAAAGTAAGACAGTATGATCAGATACCCRTAGAGATCTGTGGATATAAAGCTACAGGTACAGTATTAATAGGGCCTACACCTGTCAACATAATTGGAAGGAATCTGTTGACTCAGATTGGTTGTACTTTAAATTTTGAAATGGAGAAGGAAGGGAAAATTTCAAGAATTGGGCCTGAAAATCCATACAATACTCCAGTATTTGCCATAAAGAAAAAAGACAGTACTAAATGGAGAAAATTAGTAGATTTCAGAGAACTTAAGAGAACTCAAGACTTYTGGGAAGTTCAATTAGGA…
>AUT-110119291
ATAGAAGCYCTATTAGACACAGGAGCAGATGATACAGTRTTAGAAGAAATAAATTTACCAGGAAAATGGAAACCAAAAATGATAGGGGGAATTGGAGGYTTTATTAAAGTAAGACAATATGATCAGATACTTATAGAAATTTGTGGAAAAAGGGCCATAGGTACAGTATTAGTAGGACCTACACCTGTCAACATAATTGGACGAAATATGTTGACTCAGATTGGTTGTACTTTAAATTTTGAAATGGAAAAGGAAGGAAAGATTTCAAAAATTGGACCTGARAATCCATACAATACTCCAGTATTTGCAATAAAGAAAAAAGATAGTACTAAATGGAGAAAATTAGTAGATTTCAGAGAACTCAAAAGAACTCAAGAYTTCTGGGAGGTCCAACTAGGA…
>AUT-110119869
AAGGAAGCTCTATTAGATACAGGGGCAGATGATACAGTATTAGAAGAAATGAATTTGCCAGGGAGATGGAAACCAAAAATGATAGGGGGAATTGGAGGATTTATCAAAGTAAGACAATATGATCAGGTACCCATAGAAATCTGTGGACATAAAGCTATAGGTACAGTATTAGTAGGACCTACACCTGTCAACATAATTGGAAGAAATCTGTTGACTCAACTTGGTTGCACTTTAAATTTTGAAATGGAAAAGGAAGGGAAAATTTCAAAAATTGGGCCTGAAAATCCATACAATACTCCAGTATTTGCCATAAAGAAAAAAGACAGTAATAGATGGAGAAAATTAGTAGATTTCAGGGAACTTAAGAAAACTCAAGACTTCTGGGAAGTTCAGTTAGGA…
>AUT-110120321
ARGGAAGCTCTATTAGATACAGGAGCAGATGATACAGTATTAGAAGAWATAAATTTGCCAGGAAGATGGAAACCAAAAATGATAGGGGGAATTGGAGGTTTTATCAAAGTAAAACAGTATGAKCAGGTACCCATAGAAATCTGTGGGCATAAAGCTATAGGTACAGTATTAGTAGGACCTACACCTGTCAACATAATTGGAAGAAATCTGTTGACTCAGATTGGCTGCACTTTAAATTTTGAACTRGAARAGGAAGGAAAAATTTCAAAAATTGGGCCTGAAAAYCCATACAATACTCCARTATTTGCCATAAARAAGAAARATAGTACCAAATGGAGGAAATTAGTAGAYTTCAGAGAACTTAAGAGAACTCAAGACTTYTGGGAAGTTCAATTAGGA…
>AUT-110120397
AAGGAAGCTCTATTAGATACAGGAGCAGATGATACAGTATTAGAAGAAATGAATTTGCCAGGAAAATGGAGGCCAAAAATGATAGGGGGAATTGGAGGTTTTATCAAAGTAAGACAGTATGATCAAGTACACATAGAAATCTGTGGAAGTAAAGTTATAGGTACAGTATTAGTAGGACCTACCCCTGTCAACATAATTGGAAGAAATTTGTTGACTCAGCTTGGTTGCACTTTAAATTTTGAAATGGAAAAGGAAGGAAAAATTTCAAAAATTGGGCCTGAGAATCCATATAATACTCCAGTATTTGCTATAAAGAAAAARGACAGTACTAAATGGAGAAAATTAGTAGATTTCAGAGAACTTAAGAAAACTCAAGACTTCTGGGAAGTTCAATTAGGA…
>AUT-110121803
AAAGAAGCTCTATTAGATACAGGAGCAGATGATACAGTATTAGAAGAAATGAATTTGCCAGGAAGATGGAARCCAAAAATGATAGGGGGAATTGGAGGTTTTATCAAAGTAAGACAGTATGATCAGGTACCCATAGAAATCTGTGGGCATAAAGCTATAGGTACAGTATTAATAGGGCCTACACCTGTCAACATAATTGGAAGAAATCTGTTGACTCAGCTTGGTTGTACTTTAAATTTTGAAATGGAAAARGAAGGAAAAATTTCAAAAATTGGGCCTGAAAACCCATACAATACTCCAGTGTTTGCCATAAAGAAAAAAGACAGTACTAAATGGAGAAAATTGGTAGATTTCAGAGAACTTAAGAGAACTCAAGATTTCTGGGAAGTTCAATTAGGA…
>AUT-110124088
AAAGAAGCTCTATTAGATACAGGAGCAGATGAYACAGTATTAGAAGACATAAATTTGCCAGGAAAATGGAAACCAAAAATGATAGGGGGAATTGGAGGTTTTATCAAAGTAAGACAGTATGATCAGATACTTATAGAAATTTGTGGAAAAAAGGCTATAGGTACAGTATTGGTAGGGCCTACACCTGTYAACATAATTGGAAGAAAYATGTTGACCCAGATTGGRTGTACTTTAAATTTCGAGATGGAAAAGGAAGGAAAAATTTCAAAAATTGGGCCTGAAAATCCATACAATACTCCAATATTTGCTATAAAGAAAAARGACAGYACTAAATGGAGAAAATTAGTAGATTTCAGAGAGCTYAAAAGAACTCAAGAYTTTTGGGAAGTTCAATTAGGA…
>AUT-110124092
AAGGAAGCTCTATTAGATACAGGGGCAGATGATACAGTATTAGAAGAAATAAGTTTGCCAGGAAGATGGAAACCAAAAATGATAGGGGGAATTGGAGGTTTTATCAAAGTAAGACAGTATGATCAGGTACCCATAGAAATCTGTGGACATAAAGCTATAGGWACAGTATTAGTAGGACCTACACCTGTCAACATAATTGGAAGAAATCTGTTGACTCAGATTGGTTGCACTTTAAATTTTGAAATGGAAAAGGAAGGGAAAATTTCAAAAATTGGGCCTGAAAATCCATACAATACTCCAGTATTTGCCATAAAGAAAAAAGACAGTACTAAATGGAGAAAATTAGTAGATTTCAGAGAACTTAAGAAAACTCAAGACTTCTGGGAAGTCCAATTAGGA…
>AUT-110124129
AAGGAAGCTTTATTAGATACAGGAGCAGATGATACAGTATTAGAAGAAATGCAGTTGCCAGGGAGATGGAAACCAAAAATGATAGGGGGAATTGGAGGTTTTATCAAAGTAAGACAGTATGATCAGATACTCATAGAAATTTGTGGACATAAAGCTATAGGTACAGTATTAGTAGGACCTACACCTGTCAACATAATTGGAAGAAACCTGTTGACTCAGATTGGCTGCACTTTAAATTTTGAAATGGAAAAGGAAGGAAAAATTTCAAAAATTGGGCCTGAAAATCCATACAATACTCCAATATTTGCCATAAGGAAAAAAGACAGTACTAAATGGAGAAAATTAGTAGATTTCAGAGAACTTAAGAGAACTCAAGACTTCTGGGAAGTTCAATTAGGA…
>AUT-110124922
AAGGAAGCTYTATTAGATACAGGAGCAGATGATACAGTATTAGAAGAAATGAATTTGCCAGGAAGATGGAAACCAAAAATGATAGGGGGAATTGGAGGCTTTATCAAAGTAAGACAGTATGATCAGATACCCATAGAAATTTGTGGACATAAAGCTATAGGTACAGTATTAATAGGACCTACACCTGTCAACATAATTGGAAGAAATCTGTTGACTCAGCTTGGTTGCACTTTAAATTTTGAAATGGAGAAGGAAGGGAAAATTTCAAAAATTGGACCTGAAAATCCATACAATACTCCAGTATTTGCAATAAAGAAAAAAGACAGTACTAAATGGAGAAAATTAGTAGATTTCAGAGAACTTAAGAGAACTCAAGACTTCTGGGAAGTTCAATTAGGA…
>AUT-110125682
ATAGAAGCTCTATTAGATACAGGAGCAGATGATACAGTATTGGAAGAAATGAATTTGCCAGGAAGATGGAAACCAAAAATGATAGGGGGAATTGGAGGTTTTATCAAAGTAAAACAGTATGATCAGGTACCCATGGAAATCTGTGGATATAAAGTCATAGGTACAGTATTGGTAGGACCAACACCTGTCAACATAATTGGAAGAAATCTGATGACTCAGATTGGCTGCACTTTAAATTTTGAAATGAAAAGGAAGGAAAAAATTTCAAAAATTGGGCCTGAAAACCCATACAATACTCCAATATTCGCCATAAAGAAAAAGAACAGTACTAGATGGAGAAAAGTAGTAGACTTCAGAGAACTTAAGAGAACTCAAGACTTTTGGGAAGTTCAATTGGGA…
>AUT-110126053
AAGGAAGCTCTATTAGATACAGGAGCAGATGATACAGTATTAGAAGAAATAAATTTRCCAGGYAAATGGAAACCAAAAATGATAGGGGGAATTGGAGGTTTTATCAAAGTAAGACAGTATGATCAGRTATGCATAGAAATTTGTGGWCAYAAAGCTATAGGTACAGTATTAGTAGGACCTACACCTATCAACATAATTGGAAGAAATYTGTTGACTCARATTGGTTGCACTTTAAATTTTGAAATGGAAAAGGAAGGAAARATTTCAAAAATTGGGCCTGAAAAYCCATACAATACTCCARTATTTGCCATAAAGAAAAARRAYAGTAMTAAATGGAGAAARTTAGTAGATTTTAGAGAACTTAAGAGAACTCAAGACTTCTGGGAAGTTCAATTAGGA…
>AUT-110126060
AAGGAAGCTCTATTAGATACAGGGGCAGATGATACAGTATTAGAAGATATAAATTTGCCAGGAAAATGGARACCAAAAATGATAGGGGGAATTGGAGGYTTTATCAAAGTAAGACAGTATGATCAAGTACCCATAGAAATTTGTGGAAATAAAGTKATAGGYACAGTATTAATAGGACCTACACCTGTCAACATAATTGGAAGAAATCTGTTGACTCAGCTTGGATGCACTTTAAATTTTGAAATGGARAAGGAAGGAAAAATTTCAAAAATTGGGCCTGAGAATCCATATAATACTCCAGTATTTGCTATAAAGAAAAAAGACAGTACTAAATGGAGAAAATTAGTAGATTTCAGAGAACTTAAGAGAACTCAAGACTTCTGGGAAGTTCAATTAGGA…
>AUT-110126266
AAGGAAGCTCTATTAGATACAGGAGCAGATGATACAGTATTAGAAGACATGGATTTACCAGGAAAATGGAAACCAAAAATAATAGGGGGAATTGGAGGTTTTGTCAAAGTAAGACAGTATGATCAGATACCCATAGAAATCTGCGGACATAAAACTATAGGTACAGTATTATTAGGACCTACACCTAGCAACATAATTGGAAGAAATCTGTTGACTCAGCTTGGTTGCACTTTAAATTTTGAATTRGAGAAGGCAGGGAAAATCTCAAAAATTGGGCCTGAAAATCCATACAATACTCCAGTATTTGCCATAAAGAAAAAGGACAGTACTAAATGGAGAAAATTAATGGAYTTCAGAGAACTTAAAAGAACTCAAGACTTCTGGGAAGTTCAAYTAGGA…
>AUT-110126268
AAAGAAGCTCTATTAGATACAGGAGCAGATGATACAGTATTAGAAGAAATGAGYTTGCCAGGRAGATGGAAACCAAAAATGATAGGGGGAATTGGGGGTTTTATCAAAGTAAGACAGTATGATCAAGTACCCATAGAAATCTGTGGGAATAAAGCTATAGGTACAGTATTARTAGGACCYACACCTGTCAACATAATTGGAAGAAATCTGTTGACTCAGATTGGTTGCACTTTAAATTTTGAAATGGAAAAGGAAGGGAAAATTTCAAAAATTGGGCCTGAAAATCCATATAATACTCCAGTATTTGCCATAAAGAAAAAAGACAGTACTAAATGGAGAAAATTAGTAGATTTTAGAGARCTTAAGAAAACTCAAGACTTCTGGGAAGTTCAATTAGGA…
>AUT-110126831
AAGGAAGCTCTATTRGATACAGGAGCAGATGATACAGTATTRGAAGAAATGAATYTGCCAGGAAARTGGAGGCCAAAAATGATAGGAGGAATTGGAGGTTTTATCAAAGTAAGACAGTATGATCAAGTACACRTAGAAATCTGTGGAAATAAAGTYACAGGTACAGTRTTAATAGGRCCTACACCTGTCAACATAATTGGAAGAAATCTGTTGACTCAGCTTGGTTGCACTTTAAATTTTGAAATGGAAAAGGAAGGRAAAATTTCAAAAATTGGGCCTGAGAATCCATATAATACTCCAGTATTTGCTATAAAGAAAAAARACAGTACTARATGGAGAAAATTAGTRGATTTCAGAGAACTTAAGAGAACTCAAGATTTCTGGGAAGTTCARTTAGGA…
>AUT-110127107
AAGGAAGCTTTATTAGATACAGGAGCAGATGATACAGTATTAGAAGAAATGCAGTTGYCAGGGAGATGGAAACCAAAAATGATAGGGGGAATTGGAGGTTTTATCAAAGTAAGACAGTATGATCAGATACTCATAGAAATTTGTGGACATAAAGCTATAGGTACAGTATTAGTAGGACCTACACCTGTCAACATAATTGGAAGAAACCTGTTGACTCAGATTGGCTGCACTTTAAATTTTGAGATGGAGAAGGAAGGAAAAATTTCAAAAATTGGGCCTGAAAATCCATACAATACTCCAATATTTGCCATAAGGAAAAAAGACAGTACTAAATGGAGAAAATTAGTAGATTTCAGAGAACTTAAGAGAACTCAAGACTTCTGGGAAGTTCAATTAGGA…
>AUT-110127228
AAGGAAGCTCTATTAGATACAGGGGCAGATGATACAGTATTAGAAGAAATGAATTTGCCAGGAAAATGGARACCAAAAATGATAGGGGGAATTGGAGGTTTTATCAAAGTAAGACAGTATGATCAAGTACAAATAGAAATCTGTGGAACTAAAGTTATAGGTACAGTATTAATAGGACCTACACCTGTCAACATAATTGGAAGAAATCTRATGACTCAGCTTGGTTGCACTYTAAATTTTGAAATGGAAAAGGAAGGAAAAATTTCAAAAGTTGGGCCTGARAATCCATATAATACTCCAGTATTTGCTATAAAGAAAAAAGACAGTACTAAATGGAGAAAATTAGTAGATTTCAGAGAACTTAAGAGAACTCAAGACTTTTGGGAAGTTCAACTAGGA…
>AUT-110128333
AAGGAAGCTCTATTAGATACAGGAGCAGATGATACAGTATTAGAAGACATGACTTTGCCAGGAAGATGGAAACCAAAAATGATAGGGGGAATTGGAGGTTTTATCAAAGTAAGACAGTATGATCAGGTACCCATAGAAATTTGTGGACATAAAGCTATAGGTACAGTATTRGTAGGACCTACACCTGTCAACATAATTGGAAGAAATCTGTTGACTCAGCTTGGTTGCACTTTAAATTTTGAGATGGAAAAGGAAGGAAAAATTTCAAAAATTGGGCCTGAAAATCCATAYAATACTCCAGTATTTGCCATAAAGAAAAAAGACAGTACTAAATGGAGAAAATTAGTAGATTTCAGAGAGCTTAARAGAACTCAAGACTTCTGGGAARTTCAATTAGGA…
>AUT-110128336
AAGGAAGCTCTATTAGATACAGGAGCAGATGATACAGTATTAGAAGAAATGAATTTGCCAGGAAGATGGAAACCAAAAATGATAGGGGGAATTGGAGGTTTTATCAAAGTAAGACAGTATGATCAGATATCCATRGAMATCTGTGGACATAAAGCTATAGGTACAGTATTARTAGGGCCTACACCTGTCAACATAATTGGAAGAAATCTGTTGACTCAGATTGGCTGTACTTTAAATTTTGAAATGGAAAAGGAAGGAAAAATTTCAAAAATTGGGCCTGAAAAYCCATACAATACTCCAGTGTTTGCCATAAAGAAAAAAGACAGTACTAAATGGAGAAARTTGGTAGATTTCAGAGAACTTAAGAGAACTCAAGACTTYTGGGAAGTTCAATTAGGA…
>AUT-110148557
AAAGAAGCTCTATTAGATACAGGAGCAGATGATACAGTATTAGAAGAAATGAATTTACCAGGAAGATGGAAACCAAAAATGATAGGGGGAATTGGAGGTTTTATCAAAGTAAGACAGTATGATCAAATAAMCATAGAAATTTGTGGACATAAAGCTATAGGTACAGTATTAATAGGACCTACACCTGTCAACATAATTGGAAGAAATCTGTTGACTCAGATTGGCTGCACTTTAAATTTCGAAATGGAAAAGGAAGGAAAAATTTCAAAAATTGGGCCTGAAAATCCATACAATACTCCAGTATTTGCCATAAAGAAAAAAGACAGTACTAAATGGAGAAAATTAGTAGATTTCAGGGAACTTAAAAGAACTCAAGACTTCTGGGAAGTTCAATTAGGA…
>AUT-110149109
AAGGAAGCTCTATTAGATACAGGAGCAGATGATACAGTATTAGAAGAAATGAATTTGCCAGGGAGGTGGAAGCCAAAAATGATAGGGGGAATTGGAGGTTTTATCAAAGTAAGACAGTATGATCAGATACCCATAGAAATCTGTGGACATAAAGCTATAGGTACAGTATTAATAGGACCTACACCTGTCAACATAATTGGAAGAAATCTGTTGACTCAGCTTGGTTGCACTTTAAATTTTGAACTAGAAAAGGAAGGAAAAATTTCAAGAATTGGGCCTGAGAATCCATATAATACACCAATATTTGCCATAAAGAAAAAGGACAGTACTAAATGGAGAAAACTAGTAGATTTCAGAGAACTTAAGAGAACTCAAGACTTCTGGGAAGTTCAATTAGGA…
>AUT-110151878
AAGGAAGCTCTATTAGATACAGGAGCAGATGATACAGTATTAGAAGAAATGAGTTTGCCAGGAAGATGGAAACCAAAAATGATAGGGGGAATTGGAGGTTTTATCAAAGTAAGACAGTATGAACAAATARCAGTAGAAATCTGTGGACATAAAGCTRTAGGTACAGTATTAATAGGACCTACACCTGTCAACATAATTGGAAGAAATCTGTTGACTCAGATTGGCTGCACTTTAAATTTCGAAATGGAAAAGGAAGGAAAAATTTCAAAAATTGGGCCTGAAAATCCATACAATACTCCAGTATTTGCCATAAAGAAAAAAGACAGTACTAGATGGAGAAAATTAGTAGATTTCAGAGAACTTAAGAGAACTCAAGACTTCTGGGAAGTYCAATTAGGA…
>AUT-110152100
AAGGAAGCCCTATTAGATACAGGAGCAGATGATACAGTATTAGAAGATATAAATTTGCCWGGAAAATGGAAACCAAAAATGATAGGGGGAATTGGAGGTTTTATCAAAGTAAGACAGTATGAGGAGATACCCATAGAAATCTGTGGGAAAAARGCTATAGGTACAGTCTTAGTAGGACCTACACCTGTCAACATAATTGGAAGAAATCTGTTGACTCAGCTTGGATGCACTTTAAATTTTGAAATGGAAAAGGAAGGAAAAATTTCAAAGATTGGGCCTGAAAATCCATACAATACTCCAGTATTTGCCATAAAGAAAAAGGACAGTACTAAATGGAGAAAATTAGTAGATTTCAGAGAACTTAAGAGAACTCAAGACTTCTGGGAAGTTCAATTAGGA…
>AUT-110152230
AAAGAAGCTCTATTAGATACAGGAGCAGATGATACAGTATTAGAAGACATAAATTTGCCAGGAAAATGGARACCAAAAATGATAGGGGGAATTGGAGGTTTTATYAAGGTAAAACAGTATGATCAAATAYCTATAGAAATTTGTGGAAAAAAGGCTATAGGTACAGTATTGGTAGGACCTACACCTGTYAACATAATTGGAAGAAATATATTGACCMAGATWGGTTGTACTTTAAATTTMGAAATGGAAAAGGAAGGAAAAATTTCAAAAATTGGGCCTGAAAATCCATACAATACTCCAATATTTGCTATAAAGAAAAAAGACAGTACTAAATGGAGAAAACTAGTGGATTTCAGAGAGCTCAAAAGAACTCAAGACTTTTGGGAAGTTCAATTAGGA…
>AUT-110153199
AAGGAAGCTCTATTAGATACAGGAGCAGATGATACAGTATTRGAAGAAATGAATTTGCCAGGAAAATGGAAACCAAAAATGATAGGGGGAATTGGAGGTTTTATCAAAGTAAGACAGTATGATCAGATACCCATAGAAATCTGTGGGCATAAAGCTATAGGTACGGTTTTARTAGGACCTACACCTGTCAACATAATTGGAAGAAATCTGTTGACTCARCTTGGATGCACTTTAAATTTTGAAATGGAAAAGGAAGGAAAAATTTCAAAAATTGGGCCTGAAAATCCATACAATACTCCAGTATTTGCCATAAAGAAAAAAGACAGTACTAAATGGAGAAAATTAGTAGATTTCAGAGAACTTAAGAAAACTCAAGACTTCTGGGAAGTTCAATTAGGA…
>AUT-110155887
AAGGAGGCTCTCTTAGATACAGGAGCMGATGATACAGTATTAGAAGAAATAAATTTGCCAGGAAAATGGAAACCAAAAATGATAGGAGGAATTGGAGGTTTTATTAAAGTAAGACAGTATGATCAAATACYTATAGAAATTTGTGGGAAAAAAGCTATAGGTACAGTACTAGTAGGGCCTACRCCTGTYAACATAATTGGAAGAAATATGTTAACTCAGCTWGGATGCACACTAAATTTTGAGATGGAGAAGGAAGGAAAAATTTCAAARATTGGGCCTGAGAATCCATATAACACACCAGTGTTTGCTATAAAAAAGAARGACAGTACTAAGTGGAGAAAAWTRGTAGATTTYAGGGAACTYAAAAGGACTCAAGACTTTTGGGAAGTCCAATTGGGG…
>AUT-110158723
AAGGAAGCTCTATTAGATACAGGAGCAGATGATACAGTATTAGAAGAAATGAATTTGCCAGGAARATGGAAACCAAAAATGATAGGGGGAATTGGAGGTTTTATCAAAGTAAGACAGTATGAACAAATAACAGTAGAAATCTGTGGACATAAAGCTGTAGGTACAGTATTAATAGGACCTACACCTGTCAACATAATTGGAAGAAATCTGTTGACTCAGATTGGCTGCACTTTAAATTTCGAAATGGAAAAGGAAGGAAAAATTTCAAAAATTGGGCCTGAAAATCCATACAATACTCCAGTATTTGCCATAAAGAAAAAAGACAGTACTAGATGGAGAAAATTAGTAGATTTCAGAGAACTTAAGAGAACTCAAGACTTYTGGGAAGTTCAATTAGGA…
>AUT-110159859
AAGGAAGCTCTATTAGATACAGGAGCAGATGATACAGTATTAGAAGAAATGAATTTACCAGGAAGATGGAAACCAAAAATGATAGGGGGAATTGGAGGTTTTATCAAAGTAAGACARTATGATCAGATATCCRTAGAAATCTGTGGACATAARGCTATAGGTACAGTATTAGTAGGACCTACACCTGTTAACATAATTGGAAGAAATCTGTTGACTCAGATTGGTTGCACTTTAAATTTTGAAATGGAGAAGGAAGGRAAAATTTCAARAATTGGGCCTGAAAATCCATACAATACTCCAGTATTTGCAATAAAGAAAAAAGACAGTACTAAATGGAGAAAATTAGTAGATTTCAGAGAACTTAAGAAAACTCAAGACTTCTGGGAAGTTCAATTAGGA…
>AUT-110160279
ATAGAAGCYCTATTAGACACAGGAGCAGATGATACAGTATTAGAAAACATAGATTTACCAGGAAAATGGAAACCAAAAATGATAGGGGGAATTGGAGGTTTTATCAAAGTAAGACARTATGATCAGATACTTATGGAAATTTGTGGAAAAAGGGCCATAGGTACAGTRTTAGTAGGACCTACACCTGTCAACATAATTGGACGAAATATGTTGACTCAGATTGGTTGTACTTTAAATTTTGAGATGGAAAAGGAAGGAAAAATTTCAAAAATTGGGCCTGAAAATCCATACAATACTCCTATATTTGCCATAAAAAAGAAAGATAGTACTAAATGGAGAAAATTAGTAGATTTCAGAGAGCTCAAGAGAACTCAAGACTTCTGGGAGGTCCAATTAGGA…
>AUT-110160658
AAGGAAGCTCTATTAGATACAGGAGCAGATGATACAGTATTAGAAGACATGGAGTTGCCAGGAAGATGGAGACCAAAAATGATAGGGGGAATTGGAGGTTTTATCAAAGTAAGACAGTATGATCAGGTAGCCATAGAHATTTGTGGACATAAAACTATAGGTACAGTRTTAATAGGACCTACACCTGTCAACATAATTGGAAGAAATCTGHTGACTCAGCTTGGTTGTACTTTAAATTTTGAAATGGAAAAGGAAGGAAAAATTTCAAAAATTGGGCCTGAAAATCCATACAATACTCCAATATTTGCCATAAAGAAAAAAGACAGTACTAAATGGAGAAAATTAGTAGATTTCAGAGAACTTAAAAGAACTCAAGACTTCTGGGAAGTACAATTAGGA…
>AUT-110161180
ATGGAAGCTCTATTRGACACAGGAGCAGATGATACAGTATTAGAAGACATAAATTTACCAGGAAAATGGAAACCAAAAATGATAGGGGGAATTGGAGGTTTTATCAAAGTAAAACAGTATGATAACATAACCATAGACATTTGTGGACACAAGGCTACAGGTACAGTGTTGATAGGACCTACGCCTGTCAACATAATTGGAAGAAATATGTTGACTCAGCTTGGGTGTACATTAAATTTTGACATGGAAAAGGAAGGAAAAATTTCAAAAATTGGGCCTGAAAATCCATACAATACTCCAGTATTTGCCATAAAGAAAAAAGACAGTACTAAATGGAGAAAATTAGTAGATTTCAGAGAACTTAAAAGAACTCAAGATTTTTGGGAGGTTCAATTAGGA…
>AUT-110161860
AAGGAAGCTCTATTAGATACAGGAGCAGATGATACAGTAGTAGAAGAAATGAGTTTGCCAGGGAGATGGAAACCAAAAATGATAGGGGGAATTGGAGGTTTTATCAAAGTAAGACAGTATGATCAGATACAAGTAGAAATCTGCGGACACAAAGCTATAGGTACAGTATTAGTAGGACCTACACCTGTCAACATAATTGGAAGAAATCTGTTGACTCAAATTGGATGCACTTTAAATTTTGAAATGGAAAAGGAAGGAAAAATTTCAAAAATTGGGCCTGAAAATCCATACAATACTCCAGTGTTTGCCATAAAGAAAAAAGATAGTACTAAATGGAGAAAATTAGTAGATTTCAGAGAACTTAAGAGAACTCAAGACTTCTGGGAAGTTCAATTAGGA…
>AUT-110163955
ATAGAAGCCCTATTAGATACAGGAGCAGATGATACAGTATTAGAAGAAATAAATTTACCAGGAAAATGGAAACCAAAAATGATAGGGGGAATTGGAGGTTTTATCAAAGTAAGACAATATGATCAGATACCTATAGAAATTTGTGGRAAAAAGGCCGTAGGTACGGTATTAGTAGGGCCTACACCTGTCAACATAATTGGACGAAATATGTTGACTCAGATTGGTTGTACTTTAAATTTTGAHATGGAAAAGGAAGGAAAAATTTCAAAAATTGGGCCTGAAAATCCATACAACACCCCAGTATTTGCMATAAAGAAAAAGGATAGTACTAAATGGAGAAAATTAGTAGATTTCAGAGAACTCAAAAGAACTCAAGACTTCTGGGAGGTCCAATTAGGA…
>AUT-110168224
AAGGAAGCACTATTAGATACAGGGGCAGATGATACAGTATTAGAAGAGATGAATTTGCCAGGGAGATGGAAACCAAAAATGATAGGGGGAATTGGAGGATTTATTAAAGTAAGACAATATGATCAGGTACCCATAGAAATCTGTGGACATAAAGCTATAGGTACAGTATTAGTAGGACCTACACCTGTCAACATAATTGGAAGAAATCTGTTGACTCAACTTGGTTGCACTTTAAATTTTGAAATGGAAAAGGAAGGGAAAATTTCAAAAATTGGGCCTGAAAATCCATACAATACTCCAGTATTTGCCATAAAGAAAAAAGACAGTAATAAATGGAGAAAATTAGTAGATTTCAGGGAACTTAAGARAACTCAAGACTTCTGGGAAGTTCAGTTAGGA…
>AUT-110168691
AAGGAAGCTCTRTTAGATACAGGAGCAGATGATACAGTATTAGAAGAAATRAGTTTGCCAGGAAAATGGAGGCCAAAAATGATAGGGGGAATTGGAGGTTTTATCAAAGTAAGACAGTATGATCAAGTACACATAGAAATCTGTGGAAGTAAAGTTATAGGTACAGTATTAGTAGGGCCTACACCTGTCAACATAATTGGAAGAAATCTGTTGACTCAGCTTGGTTGCACTTTAAATTTTGAAATGGAAAAGGAAGGGAAAATTTCAAAAATTGGRCCTGAGAATCCATATAATACTCCAGTGTTTGCTATAAAGAAAAAAGACAGTACTAAATGGAGAAAATTAGTAGATTTCAGAGAACTTAAGAGAACTCAAGACTTCTGGGAAGTTCAATTAGGA…
>AUT-110169885
AAGGAAGCTCTATTGGATACAGGAGCAGATGATACAGTATTAGAAGACATGAAATTGCCAGGAAAATGGAAACCAAAATTGATAGGGGGAATTGGAGGTTTTATCAGAGTAAGACAGTATGATCAGATACTAGTAGAAATCTGTGGACATAAAGCTGTAGGTACAGTRTTAGTAGGGCCTACACCTGTCAACATAATTGGAAGAAATCTGTTGACTCAGATTGGATGTACTTTAAATTTTGAAATGGAAAAGGAAGGAAAAATTTCAAAAATTGGGCCTGAAAATCCATACAATACTCCAGTATTTGCCATAAAGAAAAAAGACAGTACTAAATGGAGGAAATTAGTAGATTTTAGAGAACTTAAGAGAACTCAGGACTTCTGGGAAGTTCAATTAGGA…
>AUT-110170874
AAGGAAGCTCTATTAGATACAGGAGCAGATGATACAGTATTWGAAGAAATGARTTTGCCAGGAARATGGAGGCCAAAAATGATAGGGGGAATTGGAGGTTTTATCAAAGTAAGACAGTATGATCAAGTACACATAGAAATCTGTGGAAGTAAAGTTATAGGTACAGTATTAGTAGGGCCTACACCTGTCAACATAATTGGAAGAAATCTGTTGACTCAGCTKGGTTGCACTTTAAATTTTGAAATGGAAAAGGAAGGGAAAATTTCAAAAATTGGGCCTGAGAATCCATATAATACTCCAGTGTTTGCTATAAAGAAAAARGACAGTACTAAATGGAGAAAATTAGTAGATTTCAGAGAACTTAAGAAAACTCAAGACTTCTGGGAAGTTCAATTAGGA…
>AUT-110170997
AGAGAAGCTCTATTAGATACAGGAGCAGATGATACAGTATTAGAAGACATAAATTTGCCAGGAAAATGGAAACCAAAGATGATAGGGGGAATTGGAGGTTTTATCAAAGTAAAACAGTATGATCAGATACTTATAGAAATTTGTGGAAAAAAGGCTATAGGTACAGTATTAGTAGGACCTACACCTGTCAACATAATTGGAAGGAATATGTTGACTCAGATTGGTTGTACTTTAAATTTTGACATGGAAAAGGAAGGAAAAATTTCAAAAATTGGGCCTGAAAATCCATACAATACCCCAATATTTGCAATAAAGAAAAARGATAGCACTAAATGGAGAAAGTTAGTGGATTTCAGAGAGCTTAAAAGAACACAAGACTTTTGGGAAGTTCAATTGGGA…
>AUT-110171241
AAGGAAGCTCTATTAGATACAGGAGCAGATGATACAGTATTAGAAGAACTGCATTTACCAGGAAAATGGAAACCAAGAATGATAGGGGGAATTGGAGGTTTTATCAAAGTAAAACAGTATGATCAGATAACCATAGAAATCTGTGGACATAAAGCTATAGGTACAGTGTTAGTAGGACCTACACCTGTCAACATAATTGGAAGAAATCTGTTGACCCAGATTGGCTGCACTTTAAATTTTGAAATGGAAAAGGAAGGAAAAATTTCAAGAATTGGGCCTGAAAATCCATACAATACCCCAGTATTTGCCATAAAGAAAAAAGATAGTACTAAATGGAGAAAATTAGTAGATTTCAGAGAACTTAAGAGAACTCAAGACTTCTGGGAAGTTCAATTAGGA…
>AUT-110172748
AAGGAAGCTCTATTAGATACAGGAGCAGATGATACAGTATTAGAAGAAATGAATTTACCAGGAAGATGGAAACCAAAAATGATAGGGGGAATTGGAGGTTTTATCAAAGTAAGACAGTATGATCAGGTAACCATAGAAATTTGTGGACATAAAGTTAYAGGTACAGTRTTAATAGGACCTACACCTGTCAACATAATTGGAAGAAATCTRTTGACTCAGCTTGGTTGCACTTTAAATTTTGAAATGGAAAAGGAAGGAAAAATTTCAAAAATTGGGCCTGAAAATCCATACAATACTCCAGTGTTTGCCATAAAGAAAAAAGACAGCACTAAATGGAGGAAATTGGTGGATTTCAGAGAGCTTAAGAGAACTCAAGACTTCTGGGAAGTTCAATTAGGA…
>AUT-110172750
AAGGAAGCTCTATTAGATACAGGAGCAGATGATACAGTGTTAGAAGAAATGAATTTGCCAGGAAGATGGAAACCAAAAATGATAGGGGGAATTGGAGGTTTTATCAAAGTAAGACAGTATGATCAGATAACCATAGAAATCTGTGGCCATAAAGCGACAGGTACAGTATTAATAGGACCTACACCTGTCAACATAATTGGAAGAAATCTGTTGACCCAGCTTGGTTGCACTTTAAATTTTGAAATGGAAAAGGAAGGAAAAATTTCAAAAATAGGGCCTGAAAACCCATATAATACTCCAGTATTTGCAATAAAGAAAAAGGACAGTACTAAATGGAGAAAATTAGTAGATTTCAGAGAACTTAAGAGAACTCAAGACTTTTGGGAAGTTCAATTAGGA…
>AUT-110173678
AAAGAAGCTCTACTAGATACAGGAGCAGATGATACAGTATTAGAAGAAATGAATTTGCCAGGAAAATGGAGACCAAAAATGATAGGGGGAATTGGAGGTTTTATCAAAGTAAGACAGTATGATCAGATAAGTGTAGAAATTTGTGGACATAAAGCTATAGGTACAGTRTTAATAGGACCTACACCTGTCAACATAATTGGAAGAAATCTGTTGACTAAGATTGGTTGTACTTTAAATTTTGAAATGGAGAAGGAAGGAAAAATTTCAAGAATTGGGCCTGAAAATCCATACAATACTCCAGTATTTGCYATAAAGAAAAAGGACAGTACTAAATGGAGAAAATTAGTAGATTTCAGAGAACTTAAGAGAACTCAAGATTTCTGGGAGGTTCAATTAGGA…
>AUT-110175794
AAAGARGCTCTATTAGATACAGGAGCAGATGATACAGTATTAGAAGATATAAATTTGCCAGGGAAATGGAAACCAAAAATGATAGGGGGAATTGGAGGTTTTATTAAGGTAAAACAGTATGAGCARATAYCTATAGAAATTTGTGGRAAAAAGGCTATAGGTACAGTACTGGTAGGACCTACACCTGTCAACATAATTGGAAGRAAYATGTTGACYCAGATTGGTTGTACTTTAAATTTTGAYATGGAAAAGGAAGGAAAAATTTCAAGAATTGGGCCTGAAAATCCATACAATACTCCAGTRTTTGCTATAAAGAAAAAAGAYAGCACTAAATGGAGGAARTTRGTAGATTTCAGAGAGCTAAAAAGAACTCAGGAYTTYTGGGAAGTTCAATTAGGA…
>AUT-110175795
AAGGAAGCTCTATTAGATACAGGAGCAGATGATACAGTATTAGAAGAAATGAATTTGCCAGGAAAATGGAGGCCAAAAATGATAGGGGGAATTGGAGGTTTTATCAAAGTAAGACAGTATGATCAAGTACMCATAGAAATCTATGGAAGTAAAGTTATAGGTACAGTRTTAATAGGACCTACACCWGTCAACATAATTGGAAGAAATCTGTTGACTCAGCTTGGTTGCACTTTAAATTTTGAAATGGAAAAGGAAGGGAAAATTTCAAAAATTGGGCCTGAGAATCCATATAATACTCCAGTGTTTGCTATAAAGAAAAAAGACAGTACTAAATGGAGAAAATTAGTAGATTTCAGAGAACTTAAGAAAACTCAAGACTTCTGGGAAGTTCAATTAGGA…
>AUT-110179928
AAGGAAGCTCTATTAGATACAGGAGCAGATGATACAGTATTAGAAGAAATGCATTTGCCAGGAAGATGGAAACCAAAAATGATAGGAGGAATTGGAGGTTTTATCAAAGTAAAACAGTATGATCAGGTAGCCATAGAGATMTGCGGACATAAAGTTATAGGTACAGTATTAGTAGGACCTACACCTGTCAACATAATTGGAAGAAATCTGTTGACGCAGCTTGGCTGCACCTTAAATTTTGAAATGGAAAAGGAAGGAAAAATTTCAAAAATTGGGCCTGAAAATCCATACAATACTCCAGTATTTGCTATAAAGAAAAAGAACAGTGATAAATGGAGAAAATTAGTAGACTTCAGAGAACTTAAAAGAACTCAAGATTTCTGGGAAGTTCAATTAGGA…
>AUT-110183817
AAGGAAGCTTTATTAGATACAGGAGCAGATGATACAGTGTTAGAAGACATGGAKTTGCCAGGAAGATGGAAACCAAAAATGATAGGGGGAATTGGAGGTTTTATCAAAGTAAGACAGTATGATCAGATACTTATAGAAATTTGCGGACATAAAACTGTAGGTACAGTATTAGTAGGACCTACCCCAGTCAACATAATTGGAAGAAATCTGTTGACTCAGCTTGGTTGCACTTTAAATTTTGAAATGGAAAAGGAAGGAAAAATTTCAAAAATTGGGCCTGAAAATCCATACAATACTCCAGTATTTGCCATAAAGAAAAAAGACAGTACTAAATGGAGAAAATTAGTAGATTTCAGAGAACTTAAAAGAACTCAAGACTTCTGGGAAGTTCAATTAGGA…
>AUT-110183818
AAGGAAGCTCTATTAGATACAGGAGCAGATGATACAGTACTAGAAGAAATGAATTTGCCAGGAAAATGGAAACCAAAAATGATAGGGGGAATTGGAGGTTTTATCAAAGTAAGACAGTATGATCAGATACYCATAGAAATYTGTGGACATAAAGCTATAGGTACAGTATTAGTAGGACCTACACCTGTCAACATAATTGGAAGGAATCTGTTGACTCAGATTGGGTGCACYTTAAATTTTGAAATGGAAAAGGAAGGGAAAATTTCAAAAATTGGGCCTGAAAATCCATACAATACTCCAGTATTTGCCATAAAGAAAAAAGACAGTACTAAATGGAGAAAATTAGTAGATTTCAGGGAACTTAAGAGAACTCAAGAYTTCTGGGAAGTTCAATTAGGA…
>AUT-110184414
AAGGAAGCTCTATTAGACACAGGAGCAGATGATACAGTATTAGAAGAAATGAGTTTGCCAGGAAAATGGAAACCAAAAATGATAGGGGGAATTGGAGGTTTTATCAAAGTAAGACAGTATGATCAGGTACTCATAGAAATTTGTGGACATAAAACTACAGGTACAGTRTTAATAGGACCTACACCTGTCAACATAATTGGAAGAAATCTRTTGACCCAACTTGGTTGCACTTTAAACTTTGAAATGGAAAAGGAAGGGAAAATTTCAAAAATTGGGCCTGAAAACCCATATAATACTCCAGTATTTGCCATAAAGAAAAAGGACAGTACTAAATGGAGAAAATTAGTAGATTTYAGAGAACTTAAGAGAACTCAAGACTTCTGGGAAGTTCAATTAGGA…
>AUT-110184449
AAGGAAGCTCTATTAGAYACAGGAGCAGATGATACAGTATTAGAAGAAATGAATTTRCCAGGAAAATGGARRCCAAAAATGATAGGGGGAATTGGAGGTTTTATCAAAGTAARACAGTATGATCAMRTASMCATAGAMATYTGTGGAMAYAARGYTAYAGGTACAGTATTAGTAGGACCTACACCTGTCAACATAATTGGAAGAAATCTGTTGACTCAGCTTGGTTGCACTTTAAATTTTGAAATGGAAAAGGAAGGGAAAATTTCAAAAATTGGGCCTGAGAATCCATATAATACTCCAGTGTTTGCTATAAAGAAAAAAGACAGTACTAAATGGAGAAAATTAGTAGATTTCAGAGAACTTAARAGAACTCAAGAYTTYTGGGARGTTCAATTAGGA…
>AUT-110184450
AAAGAAGCTCTATTAGACACAGGAGCAGATGATACGGTATTAGAAGACATAAATTTGCCAGGAAAATGGAAACCAAAAATGATAGGGGGAATTGGAGGTTTTATCAAGGTAAAACAGTATGATCAGATACTTATAGAAATTTGTGGGAAAAAGGCGRTAGGTACGGTATTAATAGGACCTACCCCTGTCAACATAATTGGAAGAAATATGTTGACTCAGCTTGGTTGTACTTTAAATTTTGAAATGGAAAAGGAAGGAAAAATTTCAAAAATTGGGCCTGAAAATCCATACAATACTCCAGTATTTGTTATAAAGAAAAAAGATAGCACTAAGTGGAGGAAATTAGTAGATTTCAGGGAGCTCAAAAGAACTCAGGACTTTTGGGAAGTTCAATTAGGA…
>AUT-110184980
AAGGAGGCTCTCTTAGATACAGGAGCAGATGATACAGTATTAGAAGACATAAATTTGCCAGGAAAATGGAAACCAAGAATGATAGGAGGAATTGGAGGTTTTATCAAAGTAAGACAATATGATCAAATACATATAGAAATTTGTGGAAAAAAGGCTATAGGTACAGTATTAGTAGGACCTACACCTGTCAACATAATTGGAAGAAATATGTTGACTCAGCTTGGATGCACACTAAATTTTGAAATGGAAAAGGAAGGAAAAATTACAAAAATTGGGCCTGATAACCCATATAACACTCCAGTATTTGCCATAAAGAAGAAGGACAGTACTAAGTGGAGAAAATTAGTAGATTTCAGGGAACTCAAAAGAACTCAAGACTTTTGGGAAGTTCAATTAGGA…
>AUT-110185500
AAGGAAGCTCTATTAGACACAGGAGCAGATGATACAGTATTAGAAGACATAAATTTACCAGGAAAATGGAAACCAAAAATGATAGGGGGAATTGGAGGTTTTATCAAAGTAAAACAATATGATAACATAGCCATAGACATTTGTGGACACAAGGCTATAGGTACAGTGTTGATAGGACCTACGCCTGTCAACATAATTGGAAGAAATATGTTGACTCAGATTGGTTGTACATTAAATTTTGAMATGGAAAAGGAAGGRAAAATTTCAAAAATTGGGCCTGAAAATCCATACAATACTCCAGTATTTGCCATAAAGAAAAAAGACAGTACTAAATGGAGAAAATTAGTAGATTTCAGAGAACTTAAAAGAACTCAAGATTTTTGGGAGGTTCAATTAGGA…
>AUT-110185501
AAGGAAGCTCTATTAGATACAGGAGCAGATGATACAGTGTTAGAAGAAATGAATTTGCCAGGAAGATGGAAACCAAAAATGATAGGGGGAATTGGAGGTTTTATCAAAGTAAGACAGTATGATCAGATAACCATAGAAATCTGTGGCCATAAAGCGACAGGTACAGTATTAATAGGACCTACACCTGTCAACATAATTGGAAGAAATCTGTTGACCCAGCTTGGTTGCACTTTAAATTTTGAAATGGAAAAGGAAGGAAAAATTTCAAAAATAGGGCCTGAAAACCCATATAATACTCCAGTATTTGCTATAAAGAAAAAGGACAGTACTAAATGGAGAAAATTAGTAGATTTCAGAGAACTTAAGAGAACTCAAGACTTTTGGGAAGTTCAATTAGGA…
>AUT-110187449
AGGGAAGCTCTATTAGACACAGGAGCAGATGATACAGTATTAGAAGACATAAATTTACCAGGAAAATGGAAACCAAAAATGATAGGGGGAATTGGAGGTTTTATCAAAGTAAAACAGTATGATAACATAGCCATAGACATTTGTGGACACAAGGCTATAGGTACAGTGTTGATAGGACCTACGCCTGTCAACATAATTGGAAGAAACATGTTGACTCAGATTGGTTGTACATTAAATTTTGACATGGAAAAGGAAGGAAAAATTTCAAAAATTGGGCCTGAAAATCCATACAATACTCCAGTATTTGCCATAAAGAAAAAAGACAGTACTAAATGGAGAAAATTAGTAGATTTCAGAGAACTTAAAAGAACTCAAGATTTTTGGGAGGTTCAATTAGGA…
>AUT-110191099
AAGGAAGCTCTATTAGACACAGGAGCAGATGATACAGTATTAGAAGACATAAATTTRCCAGGAAAATGGAAACCAAAAATGATAGGGGGAATTGGAGGTTTTATCAAAGTAAAACAGTATGATAACATAGCCATAGACATTTGTGGACACAAGGCTATAGGTACAGTGTTGATAGGACCTACGCCTGTCAACATAATTGGAAGAAAYATGTTGACTCAGATTGGGTGTACATTAAATTTTGACATGGAAAAGGAAGGAAAAATTTCAAAAATTGGGCCTGAAAATCCATACAATACTCCAGTATTTGCCATAAAGAAAAAAGACAGTACTAAATGGAGAAAATTAGTAGATTTCAGAGAACTTAAAAGAACTCAAGATTTTTGGGAGGTTCAATTAGGA…
>AUT-110191102
AAGGAAGCTCTATTAGATACAGGAGCAGATGATACAGTATTAGAAGAAATGAATTTGCCAGGAAGATGGAAACCAAAAATGATAGGAGGAATTGGAGGTTTTATCAAAGTAAGACAGTATGAACAAATAACAGTAGAAATCTGTGGACATAAAGCTGTGGGTACAGTATTAATAGGACCTACACCTGTCAACATAATTGGAAGAAATCTGTTGACTCAGATTGGCTGCACTTTAAATTTCGAAATGGAAAAGGAAGGAAAAATTTCAAAAATTGGGCCTGAAAATCCATACAATACTCCAGTATTTGCCATAAAGAAAAAAGACAGTACTAGCTGGAGAAAATTAGTAGATTTCAGAGAACTTAAGAGAACTCAAGACTTCTGGGAAGTTCAATTAGGA…
>AUT-110191104
AAGGAAGCTCTATTAGATACAGGAGCAGATGATACAGTATTAGAAGAAATGGATTTGCCAGGAAGATGGAGACCAAAAATGATAGGGGGAATTGGAGGTTTTATCAAAGTAAGAGAGTATGATCAGATACCCATAGAAATCTGTGGACATAARGTTATAGGTACAGTRTTAATAGGACCAACTCCTGTGAACATAATTGGAAGAAATCTGTTGACTCAGCTTGGTTGCACTTTAAATTTTGAAATGGAAAAGGAAGGRAAAATTTCAAAAATTGGGCCTGAAAATCCATATAATACTCCAGTATTTGCTATAAAGAAAAAGGACAGTACTAAATGGAGAAAATTAGTAGATTTCAGAGARCTTAAGAGAACTCAAGACTTCTGGGAAGTTCAATTAGGA…
>AUT-110192660
ATAGAAGCCCTATTAGACACAGGGGCAGATGACACAGTATTAGAAGAAATAAATTTACCAGGAAAATGGAAACCAAAAATGATAGGGGGAATTGGAGGTTTTATCAAAGTAAGACAATATGATCAGATACTTATAGAAATYTGTGGRAAAAGGGCCATAGGTACAGTGTTAGTAGGACCTACACCTGTCAACATAATTGGACGRAATATGTTGACTCAGATTGGTTGTACTTTAAATTTYGASATGGAAAAGGAAGGAAAAATTTCAAAAATTGGRCCTGAAAACCCATACAATACTCCAGTATTTGCCATAAAGAAAAAAGACAGTACTAAATGGAGAAAATTAGTAGATTTCAGAGAACTCAAGAGAACTCAAGACTTYTGGGAGGTCCARTTAGGA…
>AUT-110194351
AAGGAAGCTCTATTAGATACAGGAGCAGATGATACAGTATTAGAAGAAATGAATTTGCCAGGRAAATGGAGGCCAAAAATGATAGGGGGAATTGGAGGTTTTATCAAAGTAAGACARTATGATCAAGTACATATAGAAATCTGTGGAAGTAAAGTTATAGGTACAGTATTAATAGGACCTACACCTGTCAACATAATTGGAAGAAATCTGTTGACTCAGCTTGGTTGCACTTTAAATTTTGAAATGGAAAAGGAAGGGAAAATTTCAAAAATTGGGCCTGAGAATCCATATAATACTCCAGTRTTTGCTATAAAGAAAAAAGACAGTACTAARTGGAGAAAATTAGTAGATTTCAGAGAACTTAAGAGAACTCAAGACTTCTGGGAAGTTCAATTAGGA…
>AUT-110194354
ARAGAAGCTCTATTAGATACAGGAGCAGATGACACAGTATTAGAAGATATAGATTTGCCAGGAAGATGGAAACCAAAAATGATAGGGGGAATTGGAGGTTTTATCAAAGTAAGACAGTATGATCAGRTACTCATAGAAATTYGYGGACATAAAGCWGTAGGTACAGTATTAGTAGGACCTACACCTGTCAACATAATTGGAAGAAATCTGTTGACTCAGATTGGTTGCACTCTAAATTTTGAACTGGAAAAAGAAGGAAAAATCTCAAAAATAGGGCCTGAAAATCCATACAATACTCCAGTATTTGCCATAAAGAAGAAAGACAGTACTAAATGGAGAAAATTAGTAGATTTCAGAGAACTTAAGAGAACTCAAGACTTCTGGGAAGTTCAATTAGGA…
>AUT-110194444
AAGGAAGCTCTATTAGATACAGGAGCAGATGATACAGTATTAGAAGAAATGAATTTGCCAGGGAGATGGAAGCCAAAAATGATAGGGGGAATTGGAGGTTTTATCAAAGTGAGACAGTATGATCAGATAGCCATAGAAATCTGTGGACATAAAGCTATAGGCACAGTATTAATAGGACCTACCCCCGTCAACATAATTGGAAGAAATCTGTTGACTCAGCTTGGGTGCACTTTAAATTTTGAAATGGAAAAGGAAGGAAARATTTCAAGAATTGGGCCTGAAAATCCATACAATACTCCAGTATTTGCCATAAAGAAAAAAGACAGTACTAAATGGAGAAAATTAGTAGATTTCAGAGAACTTAAAAGAACTCAAGACTTCTGGGAAGTTCAATTAGGA…
>AUT-110197457
AAGGAAGCTCTATTAGATACAGGAGCAGATGATACAGTATTAGAAGAAATGAATTTGCCAGGAAAATGGAGGCCAAAAATGATAGGGGGAATTGGAGGTTTTATCAAAGTAAGACAGTATGATCAAGTACACATAGAAATCTGTGGAAGTAAAGTTATAGGTACAGTATTAGTAGGRCCTACACCTGTCAACATAATTGGAAGAAATCTGTTGACTCAGCTTGGTTGCACTTTAAATTTTGAAATGGAAAAGGAAGGGAAAATTTCAAAAATTGGGCCTGAAAATCCMTATAATACTCCAGTGTTTGCTATAAAGAAAAAAGACAGTACTAAATGGAGAAAATTAGTAGATTTCAGAGAACTTAAAAGAACTCAAGATTTTTGGGAAGTTCAATTAGGA…
>AUT-110197974
AAAGAAGCTCTATTAGATACAGGAGCAGATGATACAGTATTAGAAGACATAAATTTGCCAGGAAAATGGAAACCAAAAATGATAGGGGGAATTGGAGGTTTTATCAAAGTAAGACAGTATGATCAGATACTTATAGAAATTTGTGGAAAAAAGGCTATAGGTACAGTATTGGTAGGACCCACACCCGTCAACATAATTGGAAGAAACATGTTGACTCAGATTGGTTGTACTTTAAATTTTGAGATGGAAGAGGAAGGAAAAATTTCAAAAATTGGGCCTGAAAATCCATACAATACTCCAGTATTTGCTATAAGGAAAAAAGATAGTACTAAATGGAGAAAATTAGTAGATTTCAGAGAGCTCAAAAGAACTCAGGACTTCTGGGAAGTTCAATTAGGA…
>AUT-110198271
AAGGAAGCTCTATTAGACACAGGAGCAGATGATACAGTATTAGAAGACATAAATTTGCCAGGAAGATGGAAACCAAAGATGATAGGAGGAATTGGAGGTTTTATCAAAGTAAGACAGTATGATCAAGTAYMCATAGAMATCTGTGGAYATAAAGCTATAGGTACAGTATTAGTAGGACCTACACCCGTCAACATAATTGGAAGAAATCTGTTGACTCAGATTGGTTGCACTTTAAATTTTGAAATGGAAAAGGAAGGGAAAATTTCAAAAGTTGGGCCCGAAAACCCATATAACACTCCAGTATTTGCTATAAAGAAGAAAGACAGTACTAAATGGAGAAAATTAGTAGATTTCAGAGAACTTAAGAAAACTCAAGACTTCTGGGAAGTTCAGTTAGGA…
>AUT-110199565
AAGGAGGCTCTCTTAGATACAGGAGCAGATGATACAGTATTAGAAGACATAAATTTGCCAGGAAAATGGAAACCAAAAATGATAGGGGGAATTGGAGGTTTTATCAAAGTAAAACAGTATGATAACATAGCCATAGACATTTGTGGACACAAGGCTATAGGTACAGTGTTGGTAGGACCTACGCCTGTCAACATAATTGGAAGAAACATGTTRACTCAGATTGGTTGTACATTAAATTTTGAAATGGAAAAGGAAGGGAAAATTTCAAAAATTGGGCCTGAGAATCCATATAATACTCCAGTGTTTGCTATAAAGAAAAAAGACAGTACTAAATGGAGAAAATTAGTAGATTTCAGAGAACTTAAAAGAACTCAAGATTTTTGGGAGGTTCAATTAGGA…
>AUT-110200070
AARGAAGCTCTATTAGATACAGGAGCMGATGATACAGTATTAGAAGARATGRAKTTRCCAGGAAGATGGARACCAAAAATGATAGGGGGAATTGGAGGTTTTATCAAAGTAARRCAGTATGATCAGATACCCATAGAMATCTGTGGGCATAAAGCTATAGGTACAGTATTAGTAGGRCCTACACCTGTCAACATAATTGGAAGAAATCTGTTGACTCAGATTGGYTGYACTTTAAATTTTGAAATGGAAAAGGAAGGAAAAATTTCAAAAATTGGGCCTGAAAAYCCATACAATACTCCAGTRTTTGCCATAAAGAAAAAAGACAGTACTAAATGGAGAAAATTRGTAGATTTCAGAGAACTTAAGAGAACTCAAGACTTCTGGGAAGTTCAATTAGGA…
>AUT-110206654
AAGGAAGCTCTATTAGATACAGGAGCAGATGATACAGTATTAGAAGAAATGAATTTGCCAGGGAGGTGGAAGCCAAAAATGATAGGGGGAATTGGAGGTTTTATCAAAGTAAGACAGTATGATCAGRTABCCWTAGAGATTTGTGGACASAAARCTATAGGTACAGTATTAATAGGACCTACACCTGTYAACATAATTGGAAGAAATCTGTTGACTCAGCTTGGTTGCACTTTAAATTTTGAACTAGAAAAGGAAGGAAAAATTTCAARAATTGGGCCTGAGAATCCATATAATACACCAATATTYGCCATAAAGAAAAAGGACAGTACTAAATGGAGAAAACTAGTAGATTTCAGAGAACTTAAGAGAACTCAAGACTTCTGGGAAGTTCAATTAGGA…
>AUT-110212654
AAGGAAGCTCTATTAGATACAGGAGCAGATGATACAGTATTAGAAGAAATGAGTTTGCCAGGAAGATGGAAACCAAAAATGATAGGGGGAATTGGAGGTTTTATCAAAGTAAAACAGTATGATCAGATACCAATAGAAATCTGTGGACATAAAGCTATAGGTACAGTATTAGTAGGACCTACACCTGTCAACATAATTGGGAGAAATCTRTTGACTCAGMTTGGATGCACTTTAAATTTTGAAATGGAAAAGGAAGGAAAAATTTCAAAGATTGGGCCTGAAAATCCATACAATACTCCAGTATTTGCCATAAAGAAAAAAGACAGTACTAAATGGAGAAAATTAGTAGATTTCAGAGAACTTAAGAGAACTCAAGACTTCTGGGAAGTTCAATTRGGA…
>AUT-110213878
AAGGAAGCTCTATTAGATACAGGAGCAGATGATACAGTATTAGAAGAAATGAATTTGCCAGGAAAATGGAAGCCAAAAATGATAGGGGGAATTGGAGGTTTTATCAAAGTAAGACAGTATGATCAAGTACACATAGAAATMTGTGGACATAAAGTTATAGGTACAGTATTAATAGGACCTACACCTGTCAACATAATTGGAAGAAATCTGTTGACTCAGCTTGGTTGCACTTTAAATTTTGAAATGGAAAAGGAAGGRAAAATTTCAAAAATTGGGCCTGAGAATCCATATAATACTCCAGTATTTGCTATAAAGAAAAAAGACAGTACTAAATGGAGAAAATTAGTAGATTTCAGAGAACTTAAGAGAACTCAAGACTTCTGGGAAGTTCAATTAGGA…
>AUT-110214478
AAGSAGGCTCTCTTAGATACAGGAGCAGATGATACAGTATTAGAAGACATAAATTTGCCAGGAAAATGGAAACCAARAATGATAGGAGGAATTGGAGGTTTTATCAAAGTAAGACAGTATGAACAAATACTTATAGAAATTTGTGGAAAAAAGGCTATAGGTACAGTATTAGTGGGACCTACACCTGTCAACATAATTGGAAGAAATATGTTGACTCAGCTTGGATGTACACTAAATTTTGAYATGGAAAAGGAAGGAAAAATTACAAAAATCGGGCCTGAAAATCCATATAACACCCCAGTATTTGCYATAAAAAAGAAGGACAGTACTAAGTGGAGAAAATTAGTAGATTTCAGGGAACTCAAAAGAACTCAAGAYTTTTCGGAGGTTCAGTTAGGA…
>AUT-110214555
AAGGAAGCTCTATTAGATACAGGAGCAGATGATACAGTATTAGAAGAAATGAATTTGCCAGGCAGATGGAAACCAAAAATGATAGGGGGAATTGGAGGATTTATCAAAGTAAGACAGTATGATCAGATAGTCATAGAAATCTGTGGACATAAAGCTATAGGTACAGTATTAGTAGGACCTACACCTGTCAACATAATTGGAAGAAATTTGTTGACTCAGCTTGGCTGTACTTTAAATTTTGAAATGGAAAAGGAAGGAAAAATTACAAAAATTGGGCCTGAAAATCCATAYAATACTCCAGTATTTGCCATAAAGAAAAAAGACAGTACAAAATGGAGGAAATTAGTAGATTTCAGAGAACTTAAAAGAACTCAAGACTTTTGGGAAGTTCAATTAGGA…
>AUT-110216117
AAGGAAGCTCTATTAGATACAGGAGCAGATGATACAGTATTAGAAGAAATGAATTTGTCAGGGAGATGGAAACCAAAAATGATAGGGGGAATTGGAGGTTTTATCAAAGTAAAACAGTATGAGCAGATACCCATAGAAATCTGTGGGCATAAAGCTATAGGTACAGTATTAGTAGGACCAACACCTGTCAACATAATTGGCAGAAACCTGTTGACTCAGATTGGTTGCACTTTAAATTTTGAAATGGAAAAGGAAGGRAAAATTTCAAARATTGGGCCTGAAAATCCRTACAATACTCCAGTATTTGCCATAAAGAAAAAAGACAGTACTAAATGGAGAAAATTAGTAGATTTTAGAGAACTTAAGAGAACTCAAGACTTYTGGGAAGTTCAATTAGGA…
>AUT-110216317
AAGGAAGCTCTATTAGATACAGGAGCAGATGATACAGTATTAGAAGAAATGARTTTGCCAGGGAGGTGGAAGCCAAAAATGATAGGGGGAATTGGAGGTTTTATCAAAGTAAGACAATATGATCAGATAGCCATAGAAATCTGTGGACATAAAGCTATAGGTACAGTATTAATAGGACCTACACCTGTCAACATAATTGGAAGAAATCTGTTGACTCAGCTTGGTTGCACTTTAAATTTTGAACTAGAAAAGGAAGGAAAAATTTCAAAAATTGGGCCTGAGAATCCATATAATACACCAATATTTGCCATAAAGAAAAAGGACAGTACTAAATGGAGAAAACTAGTAGATTTCAGAGAACTTAAGAGAACTCAAGACTTCTGGGAAGTTCAATTAGGA…
>AUT-110216318
AAGGARGCTCTCTTAGATACAGGAGCAGATGATACAGTATTAGAGGAAATGAGTTTGCCAGGAAAATGGAAACCAAAAATGATAGGAGGAATTGGAGGTTTTATCAAAGTAAGACAGTATGATCAAATACATATAGAAATTTGTGGAAAAAAGGCTATAGGTACAGTATTAATAGGGCCCACACCTGTCAACATAATTGGAAGGAATATGTTGACTCARCTTGGATGCACACTAAATTTTGAAATGGAAAAGGAAGGAAAAATCACAAARATTGGGCCTGAAAATCCATATAATACTCCAGTATTTGCCATAAAAAAGAAGGACAGTACTAAGTGGAGAAAATTAGTAGATTTCAGGGAACTCAAAAGAACTCAAGACTTTTGGGAAGTTCAATTAGGA…
>AUT-110216319
AAAGAAGCTCTATTAGATACGGGAGCAGATGATACAGTATTAGRAGAAATGRATTTGYCAGGAAGATGGAAACCAAAAATGATAGGGGGAATTGGAGGTTTTATCAAAGTAAGACAGTATGATCAGATAGCCATAGAAATCTGTGGACATAAAGCTATAGGTACAGTGTTAATAGGACCTACACCTGTCAACATAATTGGAAGAAATCTGTTGACTCAGCTTGGTTGCACCTTAAATTTTGAAATGGAGAAGGAAGGGAAAATTTCAAAARTTGGACCTGAAAATCCATACAATACTCCAGTATTTGCCATAAAGAAAAAAGACAGTACTAAATGGAGAAAATTAGTAGATTTCAGAGAACTTAAGAAAACTCAAGACTTTTGGGAAATTCAATTAGGG…
>AUT-110216376
AAGGAAGCTCTATTAGATACAGGAGCAGATGATACAGTATTAGAAGAAATGGAGTTGACAGGAAAATGGAAACCAAAAATGATAGGGGGAATTGGAGGTTTTATCAAAGTAAGACAGTATGATCAGATACCCATAGAAATCTGTGGACATAAAGCTATAGGTACAGTATTAGTAGGACCAACACCTGCCAACATAATTGGCAGAAATTTGTTGACTCAGATTGGCTGCACTTTGAATTTTGAAATGGAAAAGGAAGGGAAAATTTCAAAAATTGGGCCTGAAAATCCATACAATACTCCAGTATTTGCCATAAAGAAAAAAGACAGTACTAAATGGAGAAAATTAGTAGATTTYAGAGAACTTAAGAGAACTCAAGACTTCTGGGAAGTTCAACTAGGA…
>AUT-110216494
AAAGAAGCTCTAYTAGATACAGGAGCAGATGATACAGTATTAGAAGAYATAAATTTGCCAGGAAAATGGAAACCAAAAATGATAGGGGGAATTGGAGGTTTTATCAAAGTAAGACAGTATGATCARATACTTATAGAAATTTGTGGAAAAARGGCTATAGGTACAGTATTGGTAGGACCCACACCCGTCAACATAATTGGAAGAAACATGTTGACTCAGATTGGTTGTACTTTAAATTTTGAGATGGAAGAGGAAGGAAAAATTTCAAAAATTGGGCCTGAAAATCCATACAATACTCCAGTATTTGCTATAAAGAAAAAAGATGGYAMTAAATGGAGRAAATTGGTAGATTTCAGAGARCTYAAAAGAACYCAGGACTTYTGGGAAGTTCAATTAGGA…
>AUT-110216495
AAGGAAGCTCTATTAGATACAGGAGCAGATGATACAGTATTAGAAGAAATGTGTTTGCCAGGAAGATGGAAACCAAAAATGATAGGGGGAATTGGAGGTTTTATCAAAGTAAGACAGTATGATCAGATACCCATAGAAATCTGTGGGCATAAAACAATAGGTACAGTATTAGTAGGACCCACACCTCTCAACATAATTGGAAGAAATCTGTTGACTCAGCTTGGCTGTACTCTAAATTTTGACATGGAAAAAGAAGGGAAAATTTCAAAAATTGGGCCTGAAAATCCATACAATACTCCAGTATTTGCCATAAAGAAAAAAGACAGTACTAAATGGAGAAAATTAGTAGATTTCAGAGAACTTAAGAGAACTCAAGACTTCTGGGAAGTTCAATTAGGA…
>AUT-110216496
AAGGAAGCTCTATTAGATACAGGAGCAGATGATACAGTATTAGAAGAAATGARTTTGCCAGGAAAATGGAGGCCAAAAATGATAGGGGGAATTGGAGGTTTTATCAAAGTAAGACAGTATGATCAAGTACACATAGAAATYTGTGGAAGTAAAGTTRTAGGTACAGTATTAATAGGACCCACACCTGTCAACATAATTGGAAGAAATCTGTTGACTCAGCTTGGTTGCACTTTAAATTTTGAAATGGAAAAGGAAGGAAAAATTTCAAAAATTGGGCCTGAGAATCCATATAATACTCCAGTGTTTGCTATAAAGAAAAAAGACAGTACTAAATGGAGAAAATTAGTAGATTTCAGAGAACTTAAGAGAACTCAAGACTTCTGGGAAGTTCAATTAGGA…
>AUT-110216499
AAAGAGGCTCTCTTAGACACAGGAGCTGATGATACAGTRTTAGAAGAAATAAATCTACCAGGAAAATGGAAACCAAAAATGATAGGAGGAATTGGAGGTTTTATCAAAGTAAGACAGTATGATCAGATARKRATAGAAATCTGTGGAAAGAAAGCTATAGGTACAGTACTAGTAGGRCCTACACCTGTYAACATAATTGGAAGGAACATGTTRACTCAGCTTGGATGCACACTAAATTTYGAAATGGARAAGGAAGGAAAAATTTCAAAAATTGGGCCTGAAAATCCATATAACACTCCAGTATTTGCCATAAARAAGAAGGACAGTACTAAGTGGAGAAAATTAGTAGATTTCAGGGAACTTAAAAGAACTCAAGACTTTTGGGAAGTTCAATTAGGG…
>AUT-110216500
AAGGAAGCTCTATTAGATACAGGAGCAGATGATACAGTAKTAGAAGAAATRAATTTGCCAGGAAGATGGAAACCAAAAATGATAGGGGGAATTGGAGGTTTTATCAAAGTAAGACAGTATGATCAGATACYMRTAGAAATATGTGGGCATAAAGCTATAGGTACAGTATTAGTAGGGCCTACACCTGTCAACATAATTGGAAGAAATCTGTTGACTCAGATTGGCTGTACTTTAAAYTTTGAAATGGAAAAGGAAGGAAAAATTTCAAAARTTGGRCCTGAGAATCCATACAATACTCCAGTATTTGCCATAAAGAAAAAAGACAGTACTAAATGGAGAAAATTAGTAGATTTCAGGGAACTTAAGAGAACTCAAGACTTCTGGGAAGTTCAATTAGGA…
>AUT-110217979
AAAGAGGCTCTACTAGATACAGGAGCAGATGATACAGTATTAGAAGACATAAATTTGCCAGGGAAATGGAAACCAAAAATGATAGGAGGAATTGGAGGTTTTATCAAAGTAAGAGAGTATGAAGARATACCCATAGAAATTTGTGGAAAAAAGGCTATAGGTACAGTATTAGTGGGACCTACACCTATCAACATAATTGGRAGAAATATGTTGACACAGCTTGGATGTACACTAAATTTTGAAATGGAGAAGGAAGGAAAAATTACAAAAATTGGGCCTGARAATCCATATAACACTCCAATATTTGCCATAAAAAAGAAGGACAGTACTAAGTGGAGAAAATTAGTAGATTTCAGGGAACTCAAAAGAACTCAAGACTTTTGGGAAGTTCAATTAGGA…
>AUT-110217980
AAGGAAGCTCTATTAGATACAGGAGCAGATGATACAGTAYTAGAAGAYATAGATTTRCCAGGAAGATGGAAACCAAAAATGATAGGGGGAATTGGAGGTTTTATCAAAGTAAAACAGTATGATCAGGTATCCATAGAAATCTGTGGACATAAAGCTATAGGTACAGTATTAGTAGGACCTACACCTGTCAACATAATTGGAAGAAATCTGTTGACTCAACTTGGCTGCACTTTAAATTTTGAAATGGAAAAGGAAGGAAAAATTTCAAAAATTGGGCCTGAAAACCCATACAATACTCCARTATTTGCTATAAAGAAAAAAGACAGTACTAAATGGAGAAAATTAGTAGATTTCAGAGAACTTAAGAGAACTCAAGACTTCTGGGAAGTTCAATTAGGA…
>AUT-110218025
AAGGAAGCTCTATTAGATACAGGAGCAGATGATACAGTATTAGAAGAAATGAATTTRCCAGGAAGATGGATACCAAAAATGATAGGGGGAATTGGAGGTTTTATCAAAGTAAGACAGTATGATCAGATAMTKGTAGAAATTTGTGGACATAAAGCTATAGGTACAGTATTAGTAGGACCTACACCTGTCAACATAATTGGAAGAAATCTGTTGACTCAGATTGGCTGTACTTTAAATTTTGAAATGGAAAAGGAAGGAAAAATTTCAAAAATTGGGCCTGAGAATCCATACAATACTCCAATATTTGCCATAAAGAAAAAAGACAGTACTAAATGGAGAAAATTAGTAGATTTCAGRGARCTTAAGAGAACTCAAGACTTCTGGGAAGTTCAATTAGGA…
>AUT-110218026
ATAGAAGCCCTATTAGACACAGGAGCAGATGATACAGTATTAGAAGAAATAAATTTACCAGGAAAATGGAAACCAAAAATGATAGGGGGAATTGGAGGTTTTATCAAAGTTAGACAGTATGATCAGATACCTGTAGAAATTTGTGGAAAAAGGGCCATAGGTACAGTATTAGTAGGACCYACACCTGTCAACATAATTGGACGAAACATGTTGACTCAGATTGGTTGTACTTTAAATTTTGARATGGAAAAGGAAGGGAAAATTTCAAAAATTGGGCCTGAAAACCCATACAATACTCCAGTATTTGCCATAAAGAAAAAAGATAGTACTAAATGGAGAAAATTAGTAGATTTCAGAGAGCTCAAGAGAACTCAAGACTTCTGGGAGGTCCAATTAGGA…
>AUT-110218028
AAGGAAGCTCTATTAGATACAGGAGCAGATGATACAGTATTAGAAGAAATGAGTTTACCAGGAAGATGGAAACCAAAGATGATAGGGGGAATTGGAGGTTTTATCAAAGTAAGACAATATGATCAAATACCCCTAGAAATCTGTGGACATAAAGCTACAGGTACAGTATTAATAGGACCTACGCCTGTCAACATAATTGGAAGAAATCTGTTGACTCAGATTGGCTGCACTTTAAATTTTGAAATGGAAAAGGAAGGGAAAATCTCAAGGATTGGGCCTGAAAATCCATACAATACTCCAGTATTTGCCATAAAAAAGAAAGACAGTACTAAATGGAGAAAGTTAGTAGATTTCAGAGAACTCAAGAGAACTCAAGACTTCTGGGAAGTTCAATTAGGA…
>AUT-110219990
ATAGAAGCCCTATTAGACACAGGRGCAGATGATACAGTATTAGAAGAAATAAATTTACCAGGAAAATGGAAACCAAAAATGATAGGGGGAATTGGAGGTTTTATCAAAGTAAGACAATATGATCAGATACTTTTAGAAATTTGTGGAAAAAGGGCCATAGGTACAGTATTAGTAGGACCTACACCTGTCAACATAATTGGACGAAATATGTTGACTCAGATTGGTTGTACTTTAAATTTTGAGATGGAAAAGGAAGGAAAAATTTCAAAAATTGGCCCTGAAAATCCATACAATACTCCAATATTTGCCATAAAGAAAAAAGATGGTACAAAATGGAGAAAGTTAGTAGATTTC-GAGAACTCAAAAGAACTCAAGACTTCTGGGARATCCAATTAGGA…
>AUT-110219992
AAGGAAGCTCTACTAGATACAGGAGCAGATGATACAGTATTAGAAGAAATGAATTTGCCAGGRAGATGGAAACCAAAAATGATAGGGGGAATTGGAGGTTTTATCAAAGTAAGACAGTATGATCAGATATCCATAGAAATCTGTGGGCATAAAGCTATAGGTACAGTATTAGTAGGACCTACACCTGTCAACATAATTGGAAGAAATCTGTTGACTCAGATTGGATGCACTTTAAATTTTGAAATGGAAAAGGAAGGAAAAATTTCAAAAATTGGGCCTGAAAAYCCATATAATACTCCAGTATTTGCCATAAAGAAAAAAGACAGTACTAAATGGAGAAAATTAGTAGATTTCAGGGAACTTAAGAAAACTCAAGACTTCTGGGAAGTTCAATTAGGA…
>AUT-110219993
AAGGAAGCTCTATTAGATACAGGGGCAGATGATACAGTATTAGAAGAAATGAGTTTGCCAGGAAGATGGACACCAAAAATGATAGGGGGAATTGGAGGTTTTATCAAAGTAAGACAGTATGAACAGGTACCTGTAGAAATTTGTGGACATAAAGCTATAGGTACAGTATTAGTAGGACCTACACCTGTCAACATAATTGGAAGAAATCTGTTGACTCAGGTTGGCTGTACTTTAAATTTTGAAATGGAAAAGGAAGGGAAAATTTCAAAAATTGGGCCTGAGAATCCATATAATACTCCAGTATTTGCCATAAAGAAAAAGGACAGTACTAAATGGAGAAAACTAGTAGATTTCAGAGAACTTAAGAGAACTCAAGACTTCTGGGAAGTTCAATTAGGA…
>AUT-110221494
AGGGAAGCCCTATTAGATACAGGAGCAGATGATACAGTATTAGAAGAAATAAATTTGCCAGGAAGATGGAAACCAAAAATGATAGGGGGAATTGGAGGTTTTATCAAAGTAAAACAGTATGATCAAATACCTATAGAAATTTGTGGAAGAGAAGCTATAGGTACAGTATTAGTAGGACCTACACCTGTCAACATAATTGGRAGAAATATGTTGACCCAGATTGGTTGTACTTTAAAYTTTGAAATGGAAAAGGAAGGAAAAATTTCAAGAATTGGGCCTGAAAATCCATACAATACTCCAATATTTGCCATAAAGAAAAAGGATAGTACTAAGTGGAGAAAATTAGTAGATTTTAGAGAACTTAAAAGAACTCAAGACTTCTGGGAAGTTCAGCTAGGA…
>AUT-110222620
ATAGAAGCTCTATTAGATACAGGAGCAGATGATACAGTATTAGAAGAAATAAATTTGCCAGGAAAATGGAAACCAAAAATGATAGGGGGAATTGGAGGTTTTATCAAAGTAAGACAGTATGATCAGATACTTATAGAAATTTRTGGAAAAARGGCTATAGGTACAGTATTAGTAGGACCCACACCCGTCAACATAATTGGAAGAAACATGTTGACTCAGATTGGTTGTACTTTAAATTTTGAGATGGAAGAGGAAGGAAAAATTTCAAAAATTGGGCCTGAAAATCCATACAATACTCCAGTATTTGCTATAAAGAAAAAAGAYAGTACTAAATGGAGRAAATTAGTAGATTTCAGAGAGCTCAAAAGAACTCAGGACTTCTGGGAAGTTCAATTAGGA…
>AUT-110222622
AAGGAAGCTCTATTAGATACAGGAGCAGATGATACAGTATTAGAAGACATGGCTTTGCCAGGCAGATGGAAACCAAAAATGATAGGGGGAATTGGAGGTTTTATCAAAGTGAAACAGTATGATCAAATACCCATAGAAATCTGCGGACATAARGCTATAGGTACAGTATTAGTAGGACCTACACCTGTCAACATAATTGGAAGAAATCTGTTGACTCAGATTGGCTGTACTTTAAATTTTGAAATGGAAAAGGAAGGGAAAATTTCAARAATTGGGCCTGAAAACCCATACAACACTCCARTATTTGCCATAAAGAGAAAAGATAGTACTAAATGGAGAAAATTAGTAGATTTTAGAGAACTTAAGAGAACTCAAGACTTCTGGGAAGTTCAACTAGGA…
>AUT-110223056
ATAGAAGCYCTATTAGACACAGGRGCAGATGATACAGTATTRGAACAAATAAATTTACCAGGAAAATGGAAACCAAAAATGATAGGGGGAATTGGAGGATTTATCAAAGTAAAACAGTATGATCAAATAGTTATAGAAATTGAAGGRAAAAAGGCAGTAGGGACAGTATTAGTAGGACCTACACCTATCAACATAATTGGAAGAAATATGTTGACTCAGATTGGCTGYACTTTAAATTTTGAAATGGAAAAGGAAGGAAAAATTTCAAAAATTGGGCCTGAAAATCCATACAACACTCCAATATTTGCCATAAAGAAAAARGACAGYACTAAATGGAGAAAATTGGTAGATTTCAGAGAGCTTAAAAGAACTCAAGAYTTTTGGGAGGTCCAATTAGGT…
>AUT-110223583
AAGGAAGCTCTMTTAGATACAGGAGCAGATGATACAGTATTAGAAGACATGCAGTTGCCAGGAAGATGGAAACCAAAAATGATAGGGGGAATTGGAGGTTTTATCAAAGTAAAACAGTATGATCAGATAACAGTAGACATCTGTGGACATAAAGCCACAGGTACAGTGTTAATAGGACCYACACCTGTCAACATAATTGGAAGAAATCTGTTGACTCAGATTGGCTGCACTTTAAATTTTGAAATGGAAAAGGAAGGGAAAATTTCAAAAATTGGGCCTGAAAATCCATACAATACTCCAGTATTTGCTATAAAGAAAAAAGACAGTACTAAATGGAGAAAATTAGTAGATTTCAGAGAACTTAAGAGAACTCAAGACTTCTGGGAAGTCCAATTAGGG…
>AUT-110224179
AAGGAAGCTCTATTAGATACAGGAGCAGATGATACAGTATTAGAAGAAATGAGTTTGCCAGGAAAATGGAAACCAAAAATGATAGGAGGAATTGGAGGTTTTATCAAAGTAAGACAGTATGATCAGGTGCCCATAGAAATCTGTGGACATAAAGCTATAGGTACAGTATTAGTAGGACCTACACCKGTCAACATAATTGGAAGAAACCTGTTGACTCAGATTGGTTGCACTTTAAATTTTGAAATGGAAAAGGAAGGAAAAATTTCGAARATTGGGCCTGAAAACCCATACAATACTCCAGTATTTGCCATAAAGAAAAAGGACAGTACTAAATGGAGAAAATTAGTAGATTTTAGAGAACTTAAAAGAACTCAAGATTTCTGGGAGGTTCAATTAGGA…
>AUT-110225042
AAGGAGGCTCTCTTAGATACAGGAGCAGATGATACAGTATTAGAAGACATAAATTTGCCAGGAAAATGGAAACCAAGAATGATAGGAGGAATTGGAGGTTTTATCAAAGTAAGACAATATGATCAAATACATATAGAAATTTGTGGAAAAAAGGCTATAGGTACAGTATTAGTAGGACCTACACCTGTCAACATAATTGGAAGAAATATGTTGACTCAGCTTGGATGCACACTAAATTTTGAAATGGAAAAGGAAGGAAAAATTACAAAAATTGGGCCTGATAACCCATATAACACTCCAGTATTTGCCATAAAAAAGAAGGACAGTACTAAGTGGAGAAAATTAGTAGATTTCAGGGAACTCAAAAGAACTCAAGACTTTTGGGAAGTTCAATTAGGA…
>AUT-110225126
AAAGAAGCTCTTTTAGACACAGGAGCAGATGATACAGTATTTGAAGACATGAGTTTGCCAGGAAGATGGAAACCAAAAATGATAGGAGGAATTGGAGGTTTTATCAAAGTAAAACAATATGATCAAATATCTATAGAAATTTGTGGGAAAAAGGCTATAGGTACAGTATTAGTAGGACCCACACCTGTCAACATAATTGGAAGGAATATATTGACTCAGCTTGGATGCACACTAAATTTCGAAATGGAGAAGGAAGGAAAAATTACAAAAATTGGGCCTGAAAATCCATATAACACTCCAATATTTGCCATAAAAAAGAAGGATAGTACTAAGTGGAGAAAATTAGTGGATTTCAGGGAACTCAAAAGAACTCAAGATTTTTGGGAAGTCCAATTAGGA…
>AUT-110226587
AAGGAAGCTCTATTAGATACAGGAGCAGATGATACAGTATTAGAAGAAATGAATTTGCCAGGAAAATGGAAACCAAAAATGATAGGGGGAATTGGAGGTTTTATCAAAGTAAGACAGTATGATCAGATACCCATAGAAATCTGTGGACACAARGCYATAGGTACAGTATTAGTAGGACCTACACCTGTCAACATAATTGGAAGAAATCTGTTGACTCAGATTGGTTGYACTTTAAATTTTGAAATGGAAAAGGAAGGGAAAATTTCAAAAATTGGGCCTGAAAATCCATACAATACTCCAGTATTTGCCATAAAGAAAAAAGACAGTAMTAGATGGAGAAAATTAGTAGATTTCAGAGAACTTAAGAAAACTCAAGACTTCTGGGAAGTTCAATTAGGA…
>AUT-110227494
ATAGAAGCTCTATTAGACACYGGGGCAGATGATACAGTATTAGAACAAATAGATTTACCAGGAAAATGGAAACCAAAAATGATAGGGGGAATTGGAGGATTTATCAAAGTAAAACAGTATGATCAAATACYTATAGARATTGAAGGRAAAAAGGCTATAGGGACAGTACTAGTAGGACCTACACCTATCAACATAATTGGGAGAAATATGTTGACTCAGATTGGYTGTACTTTAAATTTTGAAATGGARAAGGAAGGAAAAATTTCAAAAATTGGRCCTGAAAATCCATACAACACTCCAATATTTGCCATAAAGAAAAAAGACAGTACTAAATGGAGAAAGTTGGTRGATTTCAGAGAGCTCAAAAGAACTCAAGACTTCTGGGAGGTCCAATTAGGC…
>AUT-110227635
AAGGAAGCTCTRTTAGATACAGGAGCAGATGATACAGTCTTAGAAGAMATGAATWTGCCAGGAAGATGGAAACCAAAAATGATAGGGGGAATTGGAGGTTTTATCAAAGTAAGACAGTATGATCAGRTACMCATAGAAATTTGTGGACATAAGGCTRTAGGTACAGTATTAGTAGGACCTACACCAGTCAACATAATTGGAAGAAATCTGTTGACTCAGATTGGCTGCACTTTAAATTTTGAAATGGAAAAGGAAGGAAARATTTCAAAAATTGGACCTGAAAATCCATACAATACTCCAATATTTGCCATAAAGAAAAAGGACAGYACTAAGTGGAGAAAATTRGTAGACTTCAGAGAACTTAAGAGAACTCAAGACTTCTGGGAAGTCCAATTAGGA…
>AUT-110227656
ATAGAAGCTCTATTAGACACAGGAGCAGATGATACAGTATTAGAAGAAATAAATTTACCAGGAAAATGGAAACCAAAAATGATAGGGGGAATTGGAGGTTTTATCAAAGTAAGACAATATGATCAGATACTTATAGAAATTTGTGGGAAAAAGGCCATAGGTACAGTATTAGTAGGGCCTACACCTGTCAACATAATTGGACGAAATATGTTGACTCAGATTGGTTGTACTTTAAATTTTGAGATGGARAAGGAAGGAAAAATTTCAAAAATTGGGCCTGAAAACCCATACAATACTCCAATATTTGCYATAAAGAAAAAAGATAGTACTAAATGGAGAAAATTAGTAGATTTCAGAGAACTCAAAAGAACTCAAGACTTTTGGGAGGTCCAATTAGGA…
>AUT-110227837
AAGGAAGCTCTACTAGATACAGGAGCAGATGATACAGTATTAGAAGAAATGAATTTGCCAGGAAGATGGAAACCAAAAATGATAGGGGGAATTGGAGGTTTTATCAAAGTAAGACAGTATGATCAGATATCCATAGAAATCTGTGGGCATAAAGCTACAGGTACAGTATTARTAGGACCTACACCTGTCAACATAATTGGAAGAAATCTGTTGACTCAGATTGGATGCACTTTAAATTTTGAAATGGAAAAGGAAGGAAAAATTTCAARARTTGGGCCTGAAAATCCATATAATACTCCAGTATTTGCCATAAAGAAAAAAGACAGTACTAAATGGAGAAAATTAGTAGATTTCAGGGAACTTAAGAAAACTCAAGACTTCTGGGAAGTTCAATTAGGA…
>AUT-110229242
AAGGAAGCTCTATTAGATACAGGAGCAGATGATACAGTATTAGAAGAAATGAATTTGCCAGGAAAATGGACACCAAAAATGATAGGGGGAATTGGAGGTTTTATCAAAGTAAGACAATATGATCAGATACCCATAGAAATTTGTGGACATAAAACTATAGGTACAGTATTAATAGGACCTACACCTGTCAACATAATTGGAAGAAATCTGTTGACTAAGCTTGGTTGCACTTTAAATTTTGAAATGGAAAAGGAAGGAAAAATTTCAAAGATTGGGCCTGAAAATCCATACAATACTCCAGTATTTGCCATAAAGAAAAAAGACAGTACTAAATGGAGAAAATTGGTAGATTTCAGAGAACTTAAGAGAACTCAAGACTTCTGGGAAGTTCAATTAGGA…
>AUT-110229246
ATAGARGCCCTATTAGATACAGGAGCAGATGATACAGTATTAGAAGAAATAAATTTACCAGGAAAATGGAAACCAAAAATGATAGGGGGAATTGGAGGTTTTATTAAAGTAAGACAATATGATCAGATACTTATAGAAATTTGTGGAAAAARGGCYATAGGTACAGTATTAGTAGGACCTACACCTGTCAACATAATTGGACGAAATATGTTGACTCAGATTGGCTGTACTTTAAATTTTGAAATGGAAAAGGAAGGAAAGATTTCAAAAATTGGACCTGARAATCCATACAATACTCCAGTATTTGCCATAAAGAAAAAAGATAGTACTAAATGGAGAAAATTAGTAGATTTCAGAGAACTCAAGAGAACTCAAGACTTCTGGGAAGTCCAATTAGGA…
>AUT-110229247
AAGGAAGCTCTATTAGATACAGGAGCAGATGATACAGTATTAGAAGAAATGAGTTTGCCAGGAAGATGGAGACCAAAAATGATAGGGGGAATTGGAGGTTTTATCAAAGTAAGACAGTATGATCAGGTACCTGTAGAAATTTGTGGACATAARGCTATAGGTACAGTATTAGTAGGACCTACACCTGTCAACATAATTGGAAGAAATCTGTTGACTCAGATTGGTTGCACTTTAAATTTTGAAATGGAAAAGGAAGGAAAAATTTCAAAAATTGGGCCTGAAAATCCATACAATACTCCAGTATTTGCTATAAAGAAAAAAGACAGTACTAAATGGAGAAAATTAGTAGATTTCAGAGAACTTAAGAAAACTCAAGACTTYTGGGAAGTTCAGTTAGGA…
>AUT-110229251
AAGGAAGCYCTATTAGATACAGGAGCAGATGATACAGTATTAGAGGACATGRATTTGCCAGGAAGATGGAAACCAAAAATGATAGGGGGAATTGGAGGTTTTATCAAAGTAAGACAGTATGATCAGGTACCCATGGAAATCTGTGGGCATAAAGCTATAGGTACAGTCTTAGTAGGACCTACACCTGTCAACATAATTGGAAGGAATCTGTTGACACAAATTGGATGCACTTTAAATTTCGAAATGGAAAAGGAAGGAAAAATTTCAAAAATTGGGCCTGAAAATCCATACAATACTCCAGTATTTGCCATAAAGAAAAAAGACAGTACTAAATGGAGAAAATTAGTAGATTTTAGAGAACTTAAGAAAACTCAAGACTTCTGGGAAGTTCAATTAGGA…
>AUT-110229415
AAAGAAGCTTTATTAGATACAGGAGCAGATGATACAGTATTAGAAGACATGGATTTGCCAGGAAGATGGAAACCAAAAATGATAGGGGGAATTGGAGGTTTTATCAAAGTAAAAGAGTATGAGCAGRTAGCCATAGAAATCAGTGGACATAAAGCTATAGGTACAGTATTAATAGGACCTACACCTGTCAACATAATTGGAAGAAACCTGTTGACTCAGCTTGGTTGCACTTTAAATTTTGAAATGGAAAAGGAAGGGAAAATTTCAAAAATCGGGCCTGAAAATCCATACAATACTCCAGTATTTGCTATAAAGAAAAAAGACAGTACTAAATGGAGAAAATTAGTAGATTTTAGAGAACTTAAAAGAACTCAAGACTTCTGGGAAGTTCAATTAGGA…
>AUT-110229416
AAGGAAGCTCTATTAGATACAGGAGCAGATGATACAGTATTAGAAGACATGGATTTGCCAGGAAGGTGGAAACCAAAAATGATAGGGGGAATTGGAGGTTTTATCAAAGTGAAACAATATGATCAGATAACCTTAGAAATCTGTGGACATAAAGTTACAGGTACAGTATTAGTAGGGCCTACACCTGTCAACATAATTGGAAGAAATCTGTTGACTCAGCTTGGGTGCACTTTAAATTTTGAAATGGAAAAGGAAGGGAAAATTTCAAAAATTGGGCCTGAAAATCCATACAATACTCCAATATTTGCCATAAAGAAAAAAGACAGTACTAAATGGAGAAAATTAGTAGATTTCAGAGAACTTAAGAGAACTCAAGACTTCTGGGAAGTTCAATTAGGA…
>AUT-110229418
ATAGAAGCTCTATTAGACACAGGAGCAGATGATACAGTATTAGAACAAATAGATTTACCAGGAAAATGGAAACCAAAAATGATAGGGGGAATTGGAGGATTTATTAAAGTAAAACAGTATGATCAAATACTTATAGAAATTGAAGGGAAAAAGGCTATAGGAACAGTACTAGTAGGACCTACACCTATYAACATAATTGGAAGAAATATGTTGACTCAGATTGGTTGTACTTTAAATTTTGATATGGAAAAGGAAGGGAAAATTTCAAGAATTGGGCCTGAAAATCCATATAACACTCCAATATTTGCCATAAAGAAAAAAGACAGTACTAAATGGAGAAAGTTGGTAGATTTCAGAGAGCTCAAAAGAACTCAAGACTTCTGGGAGGTCCAATTAGGC…
>AUT-110229419
AAGGAGGCTCTCTTAGATACAGGAGCAGATGATACAGTATTAGAAGACATAAATTTGCCAGGAAAATGGAAACCAAGAATGATAGGAGGAATTGGAGGTTTTATCAAAGTAAGACAATATGATCAAATACATATAGAAATTTGTGGAAAAAAGGCTATAGGKACAGTATTAGTAGGACCTACACCTGTCAACATAATTGGAAGAAATATGTTGACTCAGCTTGGATGCACACTAAATTTTGAAATGGAAAAGGAAGGAAAAATTACAAAAATTGGGCCTGATAACCCATATAACACTCCAGTATTTGCCATAAAAAAGAAGGACAGTACTAAGTGGAGAAAATTAGTAGATTTCAGGGAACTCAAAAGAACTCAAGACTTTTGGGAAGTTCAATTAGGA…
>AUT-110229420
AAGGAAGCTCTATTAGATACAGGAGCAGATGATACAGTATTAGAAGAAATGAATTTGCCAGGCAGATGGAAACCAAAAATGATAGGGGGAATTGGAGGATTTATCAAAGTAARACAGTATGATCAGATAGTCATAGAAATCTGTGGACATAAAGCTATAGGTACAGTATTAGTAGGACCTACACCTGTCAACATAATTGGAAGAAATCTGTTGACTCARCTTGGCTGTACTTTAAATTTTGAAATGGAAAAGGAAGGAAAAATTACAAAAATTGGGCCTGAAAATCCATACAATACTCCAGTATTTGCCATAAAGAAAAAAGACAGTACAAAATGGAGGAAATTAGTAGATTTCAGAGAACTTAAAAGAACTCAAGACTTTTGGGAAGTTCAATTAGGA…
>AUT-110229422
AAGGAAGCTCTATTAGATACAGGAGCAGATGACACAGTATTAGAAGAAATGGCTTTGCCAGGAAGATGGAAACCAAAAATGATAGGGGGAATTGGAGGTTTTATCAAAGTAAGACAGTATGATCAGGTACCCATGGAAATCTGTGGGCATAAAGCTATAGGTACAGTATTAGTAGGACCTACACCTGTCAACATAATTGGAAGAAATCTGTTGRCTCAAATTGGTTGCACTTTAAATTTTGAAATGGAAAAGGAAGGGAAAATTTCAAAAATTGGGCCTGAAAATCCATACAATACTCCAGTATTTGCCATAAAGAAAAAAGACAGTACTAAATGGAGAAAATTAGTAGATTTCAGAGAACTTAAGAAAACTCAAGACTTCTGGGAAGTTCAATTAGGA…
>AUT-110229423
AAAGAAGCTCTATTAGATACAGGAGCAGATGATACAGTATTAGAAGACATAAATTTRCCAGGAAAATGGAAACCAAAAATGATAGGGGGAATTGGAGGTTTTATCAAGGTAAGACAGTATGATGAGATACCTATAGAAATTTGTGGAAAAAAGGCTATAGGTACGGTATTAATAGGGCCTACCCCTGTCAACATAATTGGAAGAAAYATGTTGACTCAGCTTGGTTGTACTTTAAATTTTGAGATGGAAAAGGAAGGAAAAATTTCAAAAATTGGGCCTGAAAATCCATACAATACTCCAGTATTTGTTATAAAGAAAAAAGATAGCACTAAGTGGAGRAAATTAGTAGATTTCAGGGAGCTCAAAAGAACTCARGACTTTTGGGAARTTCAAYTAGGA…
>AUT-110229424
AAGGAAGCTCTATTAGATACAGGAGCAGATGATACAGTATTAGAAGAAATGAATTTACCAGGAAGATGGAAACCAAAAATGATAGGGGGAATTGGAGGTTTTATCAAGGTAAGACAGTATGATCAGGTACCCATAGAAATCTGTGGGCATAAAGCTGTAGGTACAGTATTAATAGGACCTACACCTGTCAACATAATTGGAAGAAATCTGTTGACTCAGCTTGGTTGCACTTTAAATTTTGAAATGGAAAAGGAAGGAAAAATTTCAAAAATTGGGCCTGAAAATCCATACAATACTCCAGTGTTTGCCATAAAGAAAAAAGACAGTACTAAATGGAGAAAATTAGTAGACTTTAGAGAACTTAAGAGAACTCAAGACTTCTGGGAGGTTCAATTAGGA…
>AUT-110229425
AAGGAAGCTCTATTGGATACAGGAGCAGATGATACAGTATTAGAGGAAATGAGTTTGCCAGGAAAATGGAAACCAAAAATGATAGGGGGAATTGGAGGTTTTATCAAAGTAAGACAGTATGATCAGATACAGGTAGAAATCTGTGGACATAAAGCTATAGGTACAGTGTTAGTAGGACCTACACCTGTCAACATAATTGGAAGAAATCTGTTGACTCAGATTGGTTGCACCTTAAATTTTGAAATGGAAAAGGAAGGAAAAATTTCCAAAATTGGGCCTGAAAATCCATACAATACTCCAGTATTTGCCATAAAGAAAAAAGACAGTACTAAATGGAGAAAATTAGTAGATTTCAGAGAACTTAAGAGAACTCAAGATTTCTGGGAAGTTCAATTAGGA…
>AUT-110229432
AAGGAAGCTCTATTAGAYACAGGAGCAGATGATACAGTATTAGAAGAAATRRAWTTGTCAGGAAGATGGAAACCAAAAATGATAGGGGGAATTGGAGGTTTTATCAAAGTAAGACAGTATGATCAGGTACCCATAGAAATCTGTGGACATAAAGCTATAGGTACAGTATTAGTAGGACCTACACCAGTCAACATAATTGGAAGRAATCTGTTGACTCAGATTGGTTGCACTTTAAATTTTGAAATGGAAAAGGAAGGAAAAATTTCAAAAATTGGGCCTGAAAAYCCATACAATACTCCAGTATTTGCCATAAAGAAAAAAGACAGTACTAAATGGAGAAAAYTGGTAGATTTCAGAGAACTTAAGAGAACTCAAGACTTCTGGGAGGTCCAATTAGGA…
>AUT-110229433
AAGGAAGCTCTATTAGATACAGGAGCAGATGATACAGTATTAGAAGACATGCATTTGCCAGGAAAATGGAAACCAAAAATGATAGGGGGAATTGGAGGTTTTATCAAAGTAAGAYAGTATGATCAGATACCCATAGAAATCTGTGGACATAAAGCTATAGGTACAGTGTTAATAGGACCCACACCTGTCAACATAATTGGAAGAAATTTGTTGACTCAGCTTGGGTGCACTTTAAATTTTGAAATGGAGAAGGAAGGGAAAATTTCAAAAATTGGGCCTGAAAATCCATACAATACTCCAGTATTTGCCATAAAGAAAAAAGAYAGTACTAAGTGGAGAAAATTAGTAGATTTCAGAGAACTTAAGAGAACTCAGGACTTCTGGGAAGTTCAATTAGGA…
>AUT-110229498
AAGGAAGCTCTATTAGATACAGGAGCAGATGATACAGTCTTAGAAGAYATGCAGTTGCCAGGGARATGGAAACCAAAAATGATAGGGGGAATTGGAGGTTTTATCAAAGTAAGACAGTATGATCAGATACYCATAGAAATCTGTGGRCATAAAGCTATAGGTACAGTATTAGTAGGACCTACACCTGTCAACATAATTGGAAGAAACCTGTTGACTCAGATTGGCTGYACTTTAAATTTTGAGATGGAAAAGGAAGGAAAAATTTCAAAAATTGGGCCTGAAAATCCATACAATACTCCAGTATTTGCCATAAAGAAAAAAGACAGTACTAAATGGAGGAAATTAGTAGATTTCAGAGARCTTAAGAGAACTCAAGACTTCTGGGAAGTTCAATTAGGA…
>AUT-110229520
AAGGAAGCTCTATTAGACACAGGAGCAGATGATACAGTATTAGAAGAAATGAATTTGCCAGGAAGGTGGAAACCAAAAATGATAGGGGGAATTGGAGGTTTTATCAAAGTAAGACAGTATGATCAGATACACATAGAAATCTGTGGACATAAAGCTATAGGTACAGTATTAGTAGGACCAACCCCTGTCAACATAATTGGAAGAAATCTGTTGACTCAGATTGGTTGCACTTTAAATTTTGAAATGGAAAAGGAAGGAAAAATTTCAAAAATTGGGCCTGAAAATCCATATAACACTCCAGTATTTGCTATAAAGAAAAAGGACAGTACCAAATGGAGAAAATTAGTAGATTTCAGAGAACTTAAGAGAACTCAAGACTTCTGGGAAGTGCAATTAGGA…
>AUT-110229521
AAGGAGGCTCTATTAGATACAGGAGCAGATGATACAGTATTAGAAGAAATGGCTTTGCCAGGAAAATGGAAACCAAAAATGATAGGGGGAATTGGAGGTTTTATCAAAGTAARACAGTATGATCAGRTACCCATAGAAATATGTGGRCATAAAGCTATAGGTACAGTATTAGTAGGACCTACACCTGTCAACATAATTGGAAGAAATCTGTTGACTCAGCTTGGCTGCACTTTAAATTTTGAAATGGAAAAGGAAGGGAAAATTTCAAAAATTGGGCCTGAAAATCCATACAATACTCCAGTATTTGCCATAAAGAAAAAAGACAGTACTAAATGGAGAAAATTAGTAGATTTCAGAGAACTTAAGAAAACTCAAGACTTCTGGGAAGTTCAATTAGGA…
>AUT-110229550
AAGGAAGCTCTATTAGATACAGGAGCAGATGATACAGTATTAGAAGAAATGAATTTGCCAGGAAGATGGAAACCAAAAATGATAGGGGGAATTGGAGGTTTTATCAAAGTAAGACAGTATGATCAGGTACCCATAGAAATCTGTGGGCATAAAGCTATAGGTACAGTATTAGTAGGACCTACACCTGTTAACATAATTGGAAGAAATCTGTTAACTCAGATAGGTTGCACTTTAAATTTTGAGATGGAAAAGGAAGGAAAAATTTCAAAAATTGGGCCTGAAAATCCATACAATACTCCAGTATTTGCCATAAAGAAAAAAGACAGTACTAAATGGAGAAAATTAGTAGATTTCAGAGAACTTAAGAGAACTCAAGACTTCTGGGAAGTTCAATTAGGA…
>AUT-110229551
ATAGAAGCCCTACTAGACACAGGGGCGGATGATACAGTATTAGAAGACMTAAATTTACCAGGAAAATGGAAACCAAAAATGATAGGGGGAATTGGAGGTTTTATCAAAGTAAGACAATATGATCAGATACAGCTAGAAATTTGTGGAAAAAAGGCCATWGGTACAGTATTAGTAGGACCTACACCTGTCAACATAATTGGACGAAACATGTTGACTCAGATTGGTTGTACTTTAAATTTTGAGATGGAAAAGGAAGGAAAAATTTCAAAAATTGGACCTGAAAATCCATACAATACTCCAGTATTTGCCATAAAGAGAAAAGATAGTACTAAATGGAGAAAATTAGTAGATTTCAGAGAACTCAAGAGAACTCAAGACTTCTGGGAGGTCCAATTAGGA…
>AUT-110229552
AAGGAAGCTCTATTAGATACAGGAGCAGATGATACAGTATTAGAAGACATGRCTTTGCCAGGAAAATGGAAACCAAAAATGATAGGAGGAATTGGAGGTTTTATCAAAGTAAGACAGTATGATCAGATACCCATAGAAATCTGTGGGCATAAAGCTGTAGGTACAGTTTTAGTAGGACCTACACCTGTCAACATAATTGGAAGAAATCTGTTGACTCAGMTTGGATGCACTTTAAATTTTGAAATGGAAAAGGAAGGAAAAATTTCAAAAATTGGGCCTGAAAATCCATACAATACTCCAGTATTTGCCATAAAGAAAAAAGACAGTACTAAATGGAGAAAATTAGTAGATTTCAGAGAACTTAAGAGAACTCAAGACTTCTGGGAAGTTCAATTAGGA…
>AUT-110229553
ATAGAAGCCCTATTAGATACAGGAGCAGATGATACAGTATTAGAAGAMATAASTTTATCAGGAAAATGGAAACCAAAAATGATAGGGGGAATTGGAGGTTTTATCAAAGTAAGACAATATGATCAGATACCTATAGAAATTTGTGGGAAAAAGGCCATAGGTACGGTATTAGTAGGRCCTACACCTGTCAACATAATTGGACGAAATATGTTGACYCAGATTGGTTGTACTTTAAATTTTGAAATGGAAAAGGAAGGAAAAATTTCAAAAATTGGGCCTGAAAATCCATACAACACCCCAGTATTTGCCATAAAGAAAAAGGATAGTACTAAATGGAGAAAATTAGTAGATTTCAGAGAACTYAAAAGAACTCAAGAYTTYTGGGAGGTCCAATTAGGA…
>AUT-110229914
AAAGAAGCTCTATTAGATACAGGAGCAGATGACACAGTATTAGAAGAAATAGATTTGCCAGGAAGATGGAAACCAAAAATGATAGGGGGAATTGGAGGTTTTATCAAAGTAAGACAGTATGATCAGATACTCATAGAMATTTGCGGACATAAAGCTGTAGGTACAGTATTAGTAGGACCTACACCTGTCAACATAATTGGAAGAAATCTGTTGACTCAGATTGGTTGCACTCTAAATTTTGAACTGGAAAAAGAAGGAAAAATCTCAAAAATAGGGCCTGAAAATCCATACAATACTCCAGTATTTGCCATAAAGAAGAAAGACAGTACTAAATGGAGAAAATTAGTAGATTTCAGAGAACTTAAGAGAACTCAAGACTTCTGGGAAGTTCAATTAGGA…
>AUT-110230202
ATAGAAGCCTTATTAGACACAGGAGCAGATGATACAGTATTAGAAGACATAAATTTATCAGGAAAATGGAAACCAAAAATGATAGGGGGAATTGGAGGTTTTATCAAAGTAAGACAGTATGATCAGATACTTATAGAAATTTGTGGAAAAAGGGCCATAGGTACAGTATTAGTAGGACCTACACCTGTCAACATAATTGGACGAAATATGTTGACTCARATTGGYTGTACATTAAATTTTGAGATGGAAAAGGAAGGAAAAATTTCAAAAATTGGGCCTGAAAATCCATACAATACTCCAATATTTGCCATAAAGAAAAAAGATAGTACTAAATGGAGAAAATTAGTAGATTTCAGAGAACTCAAAAGAACTCAAGAYTTCTGGGAGGTCCAATTAGGA…
>AUT-110230204
AAGGAGGCCCTMTTAGACACAGGAGCAGATGATACAGTATTAGAAGAAATAAATTTGCCAGGAARATGGAARCCAAAAATGATAGGAGGAATTGGAGGTTTTATCAAAGTAAGACAGTATGATCAAATACTYATAGAAATTTGTGGAAAAAAGGCTATAGGTACAGTATTAGTAGGMCCTACACCTGTCAAYATAATTGGGAGAAATATGTTGACTCAACTWGGMTGCACCCTAAATTTTGAWATGGARAAGGAAGGAAAAATTACAAAAATTGGRCCTGAAAATCCATATAACACTCCARTATTTGCMATAAAAAAGAARGAYAGTACMAAGTGGAGAAAATTAGTAGATTTCAGGGAACTYAAAAGAACTCAAGACTTYTGGGAAGTTCAATTAGGR…
>AUT-110230795
ATAGAAGCCTTATTAGACACAGGAGCAGATGATACAGTATTAGAAGACATAAATTTATCAGGAAAATGGAAACCAAAAATGATAGGGGGAATTGGAGGTTTTATCAAAGTAAGACAGTATGATCAGATACTTTTAGAAATTTGTGGAAAAAGGGCCATAGGTACAGTATTAGTAGGACCTACACCTGTCAACATAATTGGACGAAATATGTTGACTCAAATTGGTTGTACATTAAATTTTGAGATGGAAAAGGAAGGAAAAATTTCAAAAATTGGGCCTGAAAATCCATACAATACTCCAATATTTGCTATAAAGAAAAAAGATAGTACTAAATGGAGAAAATTAGTAGATTTCAGAGAACTCAAAAGAACTCAAGAYTTCTGGGAGGTCCAATTAGGA…
>AUT-110230800
AAGGAAGCTCTATTAGATACAGGAGCAGATGATACAGTATTAGAAGAGATGAGTCTGCCAGGAAGATGGAAACCAAAAATGATAGGGGGAATTGGAGGTTTTATCAAAGTAAAACAGTATGATCAGATACCAATAGAAATCTGTGGACATAAAGCTATAGGTACAGTATTARTAGGACCTACACCTGTCAACATAATTGGAAGAAATCTGTTGACTCAGCTTGGATGCACTTTAAATTTTGAAATGGAAAAGGAAGGAAAAATTTCAAAGATTGGGCCTGAAAATCCATACAATACTCCAGTATTTGCCATAAAGAAAAAAGATAGTACTAAATGGAGAAAATTAGTAGATTTCAGAGAACTTAAGAGAACTCAAGACTTCTGGGAAGTTCAATTGGGA…
>AUT-110230801
AAGGAAGCTCTATTAGATACAGGAGCAGATGATACAGTATTAGAAGACATAAATTTGCCAGGAAAATGGAAACCAAAAATGATAGGGGGAATTGGAGGTTTTATTAAAGTAAGACAATATGAGCAAGTAGCTATAGAAATCTGTGGACATAAAGCTATAGGTACAGTATTAGTAGGACCTACACCTATCAACATAATTGGAAGAAATYTGTTAACTCAGATTGGTTGTACTTTAAATTTTGAAATGGAAAAGGAAGGAAAAATTTCAAAAATTGGGCCTGAAAATCCATACAATACTCCAGTATTTGCCATAAAGAAAAAAGACAGTACTAAATGGAGAAAATTAGTAGATTTCAGAGAACTTAAGAGAACTCAAGACTTTTGGGAAGTTCAATTAGGA…
>AUT-110231405
AAGGAAGCTCTATTAGATACAGGAGCAGATGATACAGTACTAGAAGAAATGAATTTGCCAGGAAAATGGARACCAAAAATGATAGGGGGAATTGGAGGTTTTATCAAAGTAAGACAGTATGATCAGATACCCATAGAAATCTGTGGGCATAAAGCTATAGGTACAGTATTARTAGGACCTACACCTGTCAACATAATTGGAAGAAATCTGTTGACTCAGCTTGGTTGCACTTTAAATTTTGAAATGGAAAAGGAAGGGAAGATTTCAAAAATTGGGCCTGAAAATCCATATAACACTCCAATATTTGCTATAAAGAAAAAGGACAGTACTAAATGGAGAAAATTAGTAGATTTCAGAGAACTTAAAAGAACTCAAGACTTCTGGGAGGTTCAATTAGGA…
>AUT-110232345
AAGGAAGCTCTATTAGATACAGGAGCAGATGATACAGTATTAGAAGAAATGAATTTGCCAGGAAAATGGAGGCCAAAAATGATAGGGGGAATTGGAGGTTTTATCAAAGTAAGACAGTATGATCAAGTACACATAGAAATCTGTGGAAGTAAAGTTATAGGTACAGTATTAATAGGACCCACACCTGTCAACATAATTGGAAGAAATCTGTTGACTCAGCTCGGTTGCACTTTAAATTTTGAAATGGAAAAGGAAGGGAAAATTTCAAAAATTGGGCCTGAGAATCCATATAATACTCCAGTGTTTGCTATAAAGAAAAAAGACAGTACTAAATGGAGAAAATTAGTAGATTTCAGAGAACTTAAGAGAACTCAAGACTTCTGGGAAGTTCAATTAGGA…
>AUT-110232690
AAGGAAGCTCTATTAGATACAGGAGCAGATGATACAGTATTAGAAGAAATGAGTTTACCAGGAAGATGGAAACCAAAGATGATAGGGGGAATTGGAGGTTTTATCAAAGTAAGACAATATGATCAAATACCCATAGAAATCTGTGGACATAAAGCTACAGGTACAGTATTAATAGGACCTACGCCTGTCAACATAATTGGAAGAAATCTGTTGACTCAGCTTGGCTGCACTTTAAATTTTGAAATGGAAAAGGAAGGGAAAATCTCAAAGATTGGGCCTGAAAATCCATACAATACTCCAGTATTTGCCATAAAAAAGAAAGACAGTACTAAATGGAGGAAATTAGTAGATTTCAGAGAACTCAAGAGAACTCAAGACTTCTGGGAAGTTCAATTAGGA…
>AUT-110232793
ATAGAAGCCCTATTAGACACAGGAGCAGATGATACAGTATTAGAAGGAATAAATTTACCAGGAAAATGGAAACCAAAAATGATAGGGGGAATTGGAGGTTTTATTAAAGTAAGACAATATGATCAGATACTTCTAGAAATTTGTGGAAAAARGGCCATAGGTACAGTATTAGTAGGACCTACACCTGTCAACATAATTGGACGAAATATGTTGACTCAGATTGGTTGTACTTTAAATTTTGAGATGGAAAARGAAGGAAAGATTTCAAAAATTGGACCTGAAAATCCATACAATACTCCAATATTTGCTATAAAGAAAAAAGATGGYACTAAATGGAGAAAATTAGTAGATTTCAGAGAACTCAAGAGAACTCAAGACTTCTGGGAGGTCCAATTAGGA…
>AUT-110232847
AAGGAGGCTCTCTTAGATACAGGAGCAGATGATACAGTATTAGAAGACATAAATTTGCCAGGAAAATGGAAACCAAGAATGATAGGAGGAATTGGAGGTTTTATCAAAGTAAGACAATATGATCAAATACATATAGAAATTTGTGGAAAAAAGGCTATAGGTACAGTATTAGTAGGACCTACACCTGTCAACATAATTGGAAGAAATATGTTGACTCAGCTTGGATGCACACTAAATTTTGAAATGGAAAAGGAAGGAAAAATTTCAAAAATTGGGCCTGATAACCCATATAACACTCCAGTATTTGCCATAAAAAAGAAGGACAGTACTAAGTGGAGAAAATTAGTAGATTTCAGGGAACTCAAAAGAACTCAAGACTTTTGGGAAGTTCAATTAGGA…
>AUT-110232848
AAGGAAGCTCTATTAGACACAGGAGCAGATGATACAGTATTAGAAGACATAAATTTACCAGGAAAATGGAAGCCAAAAATGATAGGGGGAATTGGAGGTTTTATCAAAGTAAAACAGTATGATAACATAGCTATAGATATTTGTGGACAYAAGGCTATAGGTACAGTGTTGATAGGACCTACGCCTGTCAACATAATTGGAAGAAACCTGTTGACTCAGATTGGTTGTACATTAAATTTTGACATGGAAAAGGAAGGAAAAATTTCAAAAATTGGGCCTGAAAATCCATACAATACTCCAGTATTTGCCATAAAGAAAAAAGACAGTACTAAATGGAGAAAATTAGTAGATTTCAGAGAACTTAAAAGAACTCAAGATTTTTGGGAGGTTCAATTAGGA…
>AUT-110232849
AAGGAAGCTCTATTAGATACAGGAGCAGATGATACAGTATTAGAAGAAATGAGTTTGCCAGGAAAATGGAGGCCAAAAATGATAGGGGGAATTGGAGGTTTTATCAAAGTAAGACAGTATGATCAAGTACAAATAGAAATCTGTGGAAGTAAAGTTATAGGTACAGTATTAGTAGGGCCTACACCTGTCAACATAATTGGAAGGAATCTGTTGACTCAGCTTGGTTGCACTTTAAATTTTGAAATGGAAAAGGAAGGGAAAATTTCAAAAATTGGGCCTGAGAATCCATATAATACTCCAGTGTTTGCTATAAAGAAAAAAGACAGTACTAAATGGAGAAAATTAGTAGATTTCAGAGAACTTAAGAAAACTCAAGACTTCTGGGAAGTTCAATTAGGA…
>AUT-110232850
ATAGAAGCCCTATTAGACACAGGGGCAGATGATACAGTATTAGAAGACATAAATTTACCAGGAAAATGGAAACCAAAAATGATAGGGGGAATTGGAGGTTTTATCAAAGTAAGACAGTATGATCAGATACTTATAGAAATTTGTGGAAAAAAGGCYATAGGTACAGTGTTAGTAGGRCCTACACCTGTCAACATAATTGGACGAAATATATTGACTCAGATTGGTTGTACTTTAAATTTTGACATGGAAAAGGAAGGAAAAATTTCAAGAATTGGGCCTGAAAATCCATACAATACTCCAATATTTGCCATAAAGAAAAAAGATAGTACTAAATGGAGAAAATTAGTAGATTTCAGAGAACTCAAGAGAACTCAAGACTTCTGGGAGGTCCAATTAGGA…
>AUT-110233116
AAGGAAGCTYTATTAGATACAGGAGCAGATGATACAGTATTAGAAGACATGVCTTTGCCAGGCAGATGGAAACCAAAAATGATAGGGGGAATTGGAGGTTTTATCAAAGTAAGACAGTATGATCAGATACCTGTAGAAATYTGCGGACATAAAGCTATAGGTACAGTATTAGTAGGCCCTACACCTGTCAACATAATTGGAAGAAATTTRTTGACTCAGATTGGCTGCACWTTAAATTTTGAGATGGAGAARGAAGGGAAAATTTCAAAAATTGGGCCTGAAAACCCATACAACACTCCARTATTTGCCATAAAGAAAAAAGACAGTACTAARTGGAGAAAATTAGTAGATTTTAGAGAACTTAAGAGAACTCAAGAYTTCTGGGAAATCCAATTAGGA…
>AUT-110233193
ATGGAAGCTCTATTAGATACAGGAGCAGATGATACAGTATTAGAAGACATAAATTTGCCAGGAAGATGGAAACCAAAAATGATAGGGGGAATTGGAGGTTTTATCAAAGTAAGACAGTATGATCAGGTACCCATAGAAATCTGTGGACATAAAGCTATAAGTACAGTATTAGTAGGACCTACACCTGTCAACATAATTGGAAGAAATATATTAACTCAGATTGGTTGCACTTTAAATTTTGAAATGGAAAAGGAAGGAAAGATTACAAAAATAGGGCCTGAAAATCCATACAATACTCCAGTATTTGCCATAAAGAAAAAAGATAGTACTAAATGGAGAAAACTAGTAGATTTTAGAGAACTTAAGAAAACTCAAGACTTCTGGGAAGTTCAACTAGGA…
>AUT-110233500
AAAGAAGCTCTATTAGATACAGGAGCAGATGATACAGTATTAGAAGAAATGGCTTTGCCAGGCAAATGGAAACCAAAAATGATAGGGGGAATTGGAGGTTTTATCAAAGTRAGACAGTATGATCAGATACMAGTAGAAATCTGTGGACATAAAGCTRTAGGTACAGTATTAGTAGGCCCTACACCTGTCAACATAATTGGAAGAAATTTGTTGACTCAGATTGGCTGCACTTTAAATTTTGAAATGGAAAAGGAAGGAAARATTTCAAAAATTGGGCCTGAAAACCCATACAACACTCCARTRTTTGCCATAAAGAAAAAAGACAGTACTAAATGGAGAAAATTAGTAGATTTYAGAGAACTTAAGAGAACTCAAGACTTCTGGGAAGTCCARTTAGGA…
>AUT-110233719
AAGGAAGCTCTCTTAGATACAGGAGCAGATGATACAGTATTAGAAGAAATAAATTTGCCAGGGAGGTGGAAACCAAAAATGATAGGGGGAATTGGAGGTTTTATCAAAGTAAGACAGTATGATCAAATACTTGTAGAAATCTGTGGACATAAAGCCATAGGTACAGTATTAGTAGGACCTACACCTGTCAACATAATTGGAAGAAATTTGTTGACTCAGATTGGTTGCACTTTAAATTTTGAAATGGAAAAGGAAGGAAAAATTTCAAAAATTGGGCCTGAAAATCCATACAATACTCCAGTATTTGCCATAAAGAAAAAAGACAGTACTAAATGGAGAAAATTAGTAGATTTCAGAGAACTTAAGAGAACTCAAGACTTCTGGGAAGTTCAATTAGGA…
>AUT-110233855
ATAGAAGCTCTATTAGATACAGGAGCAGATGATACAGTATTAGAAGAAATGAATTTGCCAGGAAGATGGAAACCAAAAATAATAGGGGGAATTGGAGGTTTTGTCAAAGTAAGACAGTATGATCAGGTACCCATAGAAATCTGTGGGCATAAAGTTATAASTACAGTATTAATAGGGCCTACACCTTTCAACATAATTGGAAGAAATCTGATGACTCAGCTTGGCGTTACTTTAAATTTTGAAATGGAAAAGGAAGGAAAAATTTCAAAAATTGGGCCTGAAAATCCATACAATACTCCAGTATTTGCCATACATAAAAAAGACAGTACTAAATGGAGAAAAGTGGTAGATTTCAGAGAACTTAAGAGAACTCAAGACTTCTGGGAGGTCCAATTAGGA…
>AUT-110234396
AAAGAGGCTCTCTTAGACACAGGGGCAGATGATACAGTATTAGAAGAAATAAGTTTGCCAGGAAAATGGAAACCAAAAATGATAGGAGGAATTGGAGGTTTTATCAAAGTAAGACAATATGATCAAATACCTATAGAAATTTGTGGAAAAAAGGCTATAGGTACAGTATTAGTAGGACCTACACCTGTCAACATAATTGGAAGAAATATGTTGACTCAGCTTGGATGCACACTAAATTTTGAAATGGAAAAGGAAGGAAAAATTACAAAAATTGGGCCTGATAATCCATATAACACTCCAGTATTTGCCATAAAAAAGAAGGACAGTACTAAGTGGAGAAAATTAGTAGATTTCAGGGAACTTAAAAGAACTCAAGACTTTTGGGAAGTTCAATTAGGA…
>AUT-110234594
AAGGAAGCTCTATTAGATACAGGAGCAGATGATACAGTAGTAGAAGAAATGAGTTTGCCAGGGAGATGGAAACCAAAAATGATAGGGGGAATTGGAGGTTTTATCAAAGTAAGACAGTATGATCAGATACAAGTAGAAATCTGCGGACACAAAGCTATAGGTACAGTATTAGTAGGACCTACACCTGTCAACATAATTGGAAGAAACCTGTTGACTCAAATTGGATGCACTTTAAATTTTGAAATGGAAAAGGAAGGAAAAATTTCAAAAATTGGGCCTGAAAATCCATACAATACTCCAGTGTTTGCCATAAAGAAAAAAGATAGTACTAAATGGAGAAAATTAGTAGATTTCAGAGAACTTAAGAGAACTCAAGACTTCTGGGAAGTTCAATTAGGA…
>AUT-110234804
AAGGAAGCTCTATTAGATACAGGAGCAGATGATACAGTATTAGAAGAAATGAGTTTGCCAGGAAGATGGAAACCAAAAATGATAGGGGGAATTGGAGGTTTTATCAAAGTAAAACAGTATGATCAGATACCAATAGAAATCTGTGGACATAAAGCTACAGGTACAGTATTAGTAGGACCTACACCTGTCAACATAATTGGGAGAAATCTGTTGACTCAGCTTGGATGCACTTTAAATTTTGAAATGGAAAAGGAAGGAAAAATTTCAAAGATTGGGCCTGAAAATCCATACAATACTCCAGTATTTGCCATAAAGAAAAAAGACAGTACTAAATGGAGAAAATTAGTAGATTTCAGAGAACTTAAGAGAACTCAAGACTTCTGGGAAGTTCAATTGGGA…
>AUT-110234805
AAGGAGGCTCTCTTAGATACAGGAGCAGATGATACAGTATTRGAAGACATAAATTTGCCAGGAAAATGGAAACCAAGAATGATAGGAGGAATTGGAGGTTTTATCAAAGTAAGACAATATGATCAAATACATATAGAAATTTGTGGAAAAAAGGCTATAGGTACAGTATTAGTAGGACCTACACCTGTCAACATAATTGGAAGAAATATGTTGACTCAGCTTGGATGCACACTAAATTTTGAMATGGAAAAGGAAGGAAAAATTACAAAAATTGGGCCTGATAACCCATATAACACTCCAGTATTTGCCATAAAGAAGAAGGACAGTACTAAGTGGAGAAAATTAGTAGATTTCAGGGARCTCAAAAGAACTCAAGACTTTTGGGAAGTTCAATTAGGA…
>AUT-110234806
AAAGAAGCTCTATTAGATACAGGAGCAGATGATACAGTMTTAGAAGATATAAATTTGCCAGGGAAAGNNNNNNNNNNNNNNNNNNNNNNAATTGGAGGTTTTATCAAGGTAAGGCAATATGATCAGATACCTATAGAAATTTGTGGAAAARGGGCTATAGGTACAGTATTAGTAGGACCTACACCTGTCAACATAATTGGACGAAATATGTTGACTCAGATTGGTTGTACTCTAAATTTCRARATGGAARAGGAGGGAAAAATCTCAAAAATTGGGCCTGAAAATCCATACAATACTCCAGTATTTGCTATAAAGAAAAAGGACAGCACTAAATGGAGGAAATTAGTGGACTTCAGAGAGCTCAAAAGAACTCAGGACTTTTGGGAAGTTCAATTAGGA…
>AUT-110234815
AAGGAAGCTCTATTAGATACAGGAGCAGATGATACAGTATTAGAAGACATGRATTTGCCAGGAAGATGGAAACCAAAAATGATAGGGGGAATTGGAGGTTTTATCAAAGTAAAACAGTATGATCAAGTACCCATAGAAATCTGTGGGCAYAAAGCTATTGGTACAGTATTAGTAGGACCTACACCTGTCAACATAATTGGAAGAAATCTGTTGACTCAGATTGGCTGCACTTTAAATTTTGAAATGGAAAAGGAAGGRAAAATTTCAAAAATTGGGCCTGAAAATCCATACAATACTCCAGTATTTGCTATAAAGAAAAAAGACAGTACTAAATGGAGAAAATTAGTAGACTTTAGRGAACTTAAGAGAACACAAGACTTTTGGGAAGTTCAATTAGGA…
>AUT-110234816
ATAGAAGCCCTATTAGACACAGGAGCAGATGATACAGTATTARARGAAATAGATTTACCAGGAAAATGGAAACCAAAAATGATAGGGGGAATTGGAGGTTTTATTAAAGTAAGACAATATGATCAGATACTTATAGAAATTTGTGGAAAAAAGGCCATAGGTACAGTATTAGTAGGACCTACACCTGTCAACATAATTGGACGAAACATGTTGACTCAGATTGGTTGTACTTTAAATTTTGARATGGAAAAGGAAGGRAAAATTTCAAAAATTGGGCCTGAAAATCCATACAATACTCCAGTATTTGCCATAAAGAAAAARGACAGTACTAAATGGAGAAAATTAGTAGATTTCAGAGAACTCAAGAGAACTCAAGACTTCTGGGAGGTCCAATTAGGA…
>AUT-110235253
AAGGAAGCTCTATTAGATACAGGGGCAGATGATACAGTAGTAGAAGACATAAATTTRCCAGGGAGATGGAAACCAAAAATGATAGGGGGAATTGGAGGTTTTATCAAAGTAAAACAGTATGATSAGRTACAAGTAGAAATCTGTGGACATAAAGCTATAGGTACAGTATTAGTAGGACATACACCTGTCAATATAATTGGAAGAAACCTGTTAACTCAGCTTGGATGCACTTTAAATTTTGAAATGGAAAAGGAAGGAAAAATTTCAAAAATTGGGCCTGAAAATCCATATAATACTCCAATATTTGCCATAAAGAAAAAGGACAGTACTAAATGGAGAAAATTAGTAGATTTCAGAGAACTTAAGAGAACTCAAGACTTCTGGGAAGTTCAGTTAGGG…
>AUT-110235543
AAGGAAGCTCTATTAGATACAGGAGCAGATGATACAGTRTTAGAAGACATGGAGTTGCCAGGAAAATGGAGACCAAAAATGATAGGGGGAATTGGAGGTTTTATCAAAGTAARGCARTATGATCAGRTACCCATAGAMATCTGTGGGCATAAAGCTATAGGTACAGTATTAGTAGGACCTACACCTGTCAACATAATTGGAAGAAATCTGTTGACTCAGCTTGGTTGCACTTTAAATTTTGATATGGAAAAGGAAGGAAAAATTTCAAAAATTGGGCCTGAAAATCCATACAATACTCCAGTATTTGCCATAAAGAAAAAAGACAGTACTAAATGGAGAAAATTAGTAGAYTTCAGAGAACTTAAGARAACTCAAGAYTTCTGGGAAGTTCAATTAGGA…
>AUT-110235697
AAGGAAGCTCTGTTAGATACAGGAGCAGATGATACAGTATTAGAAGAAATGAATTTGTCAGGAAGATGGAAGCCAAAAATGATAGGGGGAATTGGAGGTTTTATCAAAGTAAGACAGTATGATCAGGTAGCCATAGAAATCTGTGGACATAAAGCTATAGGTACAGTATTAATAGGACCCACACCTGTCAACATAATTGGAAGAAATCTGTTGACACAGCTTGGTTGCACTTTAAATTTTGAAATGGAAAAGGAAGGAAAAATTTCAAAAATTGGGCCTGAGAATCCATATAATACTCCAGTATTCGCTATAAAGAAGAAAGACAGTACTAAATGGAGAAAATTAGTAGATTTCAGAGAACTTAAGAGAACCCAGGACTTCTGGGAAGTCCAACTAGGA…
>AUT-110235698
AAGGAAGCTCTATTAGATACAGGAGCAGATGATACAGTATTAGAAGACATAAATTTGCCAGGAAGATGGAAACCAAAAATGATAGGGGGAATTGGAGGTTTTATCAAAGTAAAACAGTATGATCAGATAACCATAGATATCTGTGGACACAAAGCTACAGGTACAGTGTTAGTAGGACCTACACCTGTCAACATAATTGGAAGAAATCTGTTGACTCAGATTGGGTGCACTCTAAATTTTGARATGGAAAAGGARGGRAAAATTTCAAAAATTGGGCCTGAAAAYCCRTACAATACTCCAGTATTTGCCATAAAGAAAAAAGACAGTACTAARTGGAGAAAATTRGTAGAYTTYAGAGAACTTAARAGAACTCARGACTTCTGGGAAGTWCAATTAGGR…
>AUT-110235975
AAAGAAGCTCTATTAGACACAGGAGCAGATGATACAGTATTAGAAGAAATGAATTTGCAAGGAAGGTGGAAACCAAAAATGATAGGGGGAATTGGAGGTTTTATCAAAGTAAGACAGTATGAYCAGGTACCCATAGAAATCTGTGGACATAAAGTTATAGGTACAGTATTAATAGGACCTACACCTGTCAACATAATTGGAAGGAATCTGTTGACTCAGCTTGGCTGCACTTTAAATTTTGAAATGGAAAAGGAAGGRAAAATTTCAAAGATTGGGCCTGAAAATCCATACAATACTCCAGTATTTGCCATAAAGAAAAAGGATAGTACTAAGTGGAGAAAATTAGTAGATTTTAGGGAACTTAAGAGAACTCAAGACTTCTGGGAAGTGCAATTAGGA…
>AUT-110236594
AAGGAAGCTCTATTGGATACAGGAGCAGATGATACAGTATTAGAAGAAATAAATTTGCCAGGAAGATGGAAACCAAAAATGATAGGGGGAATTGGAGGYTTTATCAAAGTAAGACAGTATGATCAGATACTAGTAGAAATCTGTGGACATAAAGCWGTAGGTACAGTATTAGTAGGGCCTACACCTGTCAACATAATTGGAAGAAATCTGTTGACTCAGATTGGATGTACTTTAAATTTTGAAATGGAAAAGGAAGGAAAAATTTCAAAAATTGGGCCTGAAAATCCATACAATACTCCAGTATTTGCCATAAAGAAAAAAGACAGTACTAAATGGAGGAAATTAGTAGATTTTAGAGAACTTAARAGAACTCAAGACTTCTGGGAAGTTCAATTAGGA…
>AUT-110237156
AAGGAGGCTCTCTTAGATACAGGAGCAGATGATACAGTATTAGAAGACATAAATTTGCCAGGAAAATGGAAACCAAGAATGATAGGAGGAATTGGAGGTTTTATCAAAGTAAGACAATATGATCAAATACATATAGAAATTTGTGGAAAAAAGGCTATAGGTACAGTATTAGTAGGACCTACACCTGTCAACATAATTGGAAGAAATATGTTGACTCAGCTTGGATGCACACTAAATTTTGAAATGGAAAAGGAAGGAAAAATTACAAAAATTGGGCCTGATAACCCATATAACACTCCAGTATTTGCCATAAAAAAGAAGGACAGTACTAAGTGGAGAAAATTAGTAGATTTCAGGGAACTCAAAAGAACTCAAGACTTTTGGGAAGTTCAATTAGGA…
>AUT-110237158
AGAGAGGCTCTATTAGATACAGGAGCAGATGATACAGTATTAGAAGACATAAATTTGCCAGGGAAATGGAAACCAAGAATGATAGGGGGAATTGGAGGTTTCATCAAGGTAAAACAGTATGATCAGATACTTATAGAAATTTGTGGAAAAAAGGCTATAGGTACAGTATTAGTAGGACCCACACCTGTCAACATAATTGGAAGAAATATGTTGACTCAGATTGGCTGTACTTTAAATTTCGATATGGAAAAGGAAGGAAAAATTTCAAGGATTGGGCCTGAAAATCCATACAATACTCCAATATTTGCAATAAAGAAAAAAGACAGTACTAAATGGAGGAAATTAGTAGATTTCAGAGAGCTCAAAAGAACACAAGACTTTTGGGAAGTTCAATTAGGA…
>AUT-110237562
AAGGAAGCTCTATTAGATACAGGAGCAGATGATACAGTATTAGAAGAAATAAGTTTGCCAGGAAAATGGAAACCAAAAATGATAGGGGGAATTGGAGGTTTTATCAAAGTAAGACAATATGATCAGATACAAGTAGAAATCTGTGGACATAAAGCTGTGGGTACAGTATTAGTAGGGCCTACACCTGTCAACATAATTGGAAGAAATCTGTTGACTCAGATTGGATGTACTTTAAATTTTGAAATGGAAAAGGAAGGAAAGATTTCAAAAATTGGGCCTGAAAATCCATACAATACTCCAGTATTTGCCATAAAGAAAAAAGACAGTACTAAATGGAGRAAATTAGTAGATTTTAGAGAACTTAAGAGAACTCARGACTTCTGGGAAGTTCAATTAGGA…
>AUT-110237773
AAAGAAGCTCTATTAGATACAGGAGCAGATGATACAGTATTAGAAGAAATGAATTTGCCAGGAAGATGGAAACCAAAATTGATAGGGGGAATTGGAGGTTTTATCAAAGTAAGACAGTATGATCAGATGCCCATAGAAATCTGTGGACACAAAGTTATAGGTACAGTATTAGTAGGACCTACACCTGTCAACATAATTGGAAGAAATCTGTTGACTAAGATTGGCTGTACTTTAAATTTTGAATTGGAAAAGGAAGGAAAAATTTCAAAAATTGGGCCTGAAAATCCATACAATACTCCAGTGTTTGCCATAAAGAAAAAAGACAGTACTAAATGGAGAAAATTGGTAGATTTCAGAGAACTTAAGAGAACTCAAGACTTCTGGGAAGTTCAATTAGGA…
>AUT-110237775
AAAGAAGCTCTATTAGATACAGGAGCAGATGATACAGTATTAGAAGAAATGAATTTGCCAGGRAGATGGAAACCAAAATTGATAGGGGGAATTGGAGGTTTTATCAAAGTAAGACAGTATGATCAGATGCCCATAGAAATCTGTGGRCAYAAAGTTATAGGTACAGTATTAGTAGGRCCTACACCTGTCAACATAATTGGAAGAAATCTGTTGACTAAGATTGGCTGTACTTTAAATTTTGAATTGGAAAAGGAAGGAAAAATTTCAAAAATTGGGCCTGAAAATCCATACAATACTCCAGTGTTTGCCATAARGAAAAAAGACAGTACTAAATGGAGAAAATTGGTAGATTTCAGAGAACTTAAGAGAACTCAAGACTTCTGGGAAGTTCAATTAGGA…
>AUT-110238276
AAGGARGCTCTATTAGATACAGGGGCAGATGATACAGTATTAGAAGACATAAATTTGCCAGGAAAATGGARACCAAAAATGATAGGGGGAATTGGAGGTTTTATCAAAGTAAAACAGTATGACCAAGTACATATAGAAATCTGTGGACATAAAGTTATAGGTACAGTATTAATAGGACCTACACCTGTCAACATAATTGGAAGAAATCTGTTGACTCAGCTTGGTTGCACTTTAAATTTCGAAATGGAAAAGGAAGGAAAAATTTCAAAAATTGGGCCTGAGAATCCATATAATACTCCAGTATTTGCTATAAAGAAAAAAGACAGTACTAAATGGAGAAAATTAGTAGATTTCAGAGAACTTAAAAGAACTCAAGACTTTTGGGAAGTTCAACTAGGA…
>AUT-110238279
AAAGAAGCTCTATTAGATACAGGAGCAGATGATACAGTATTAGAAGAAATAAATTTGCCAGGAAGATGGAAACCAAAAATGATAGGGGGAATTGGAGGTTTTATCAAAGTCAGACAGTATGATCAGGTACCCATAGAGATTTGTGGACATAAGGCTATAGGTACAGTATTAGTAGGACCTACACCTGTCAACATAATTGGAAGAAATTTGTTGACTCAGATTGGCTGCACTCTAAATTTTGAAATGGAGAAGGAAGGAAAAATTTCAAGAATTGGGCCTGAAAATCCATACAATACTCCAGTATTTGCCATAAAGAAAAAAGACAGTACTAAATGGAGGAAATTAGTAGATTTCAGAGAACTTAAGAAAACTCAAGACTTCTGGGAAGTCCAACTAGGG…
>AUT-110238398
AGGGARGCTCTATTAGATACAGGAGCAGATGATACAGTATTAGAAGAAATAAATTTGCCAGGAAAATGGAARCCAAAAATGATAGGGGGAATTGGAGGTTTTATCAAAGTAAAACAGTATGATCAAATARCTATAGATATTTGTGGACATAAGGCTGTAGGTACAGTGTTAGTAGGACCTACRCCTGTCAACATAATTGGAAGAAATTTGTTGACTCAGATTGGWTGTACTTTAAATTTTGAAATGGAAAAAGAAGGAAAAATTTCAAAAATTGGGCCTGAAAATCCATACAATACTCCAGTATTTGCCATAAAGAAAAAGGACAGTACTAAATGGAGAAAATTAGTAGATTTTAGAGAACTTAAAAGGACTCAAGATTTTTGGGAAGTCCAATTAGGA…
>AUT-110239210
ATAGAAGCCTTATTAGACACAGGAGCAGATGATACAGTATTAGAAGACATAAATTTATCAGGAAAATGGAAACCAAAAATGATAGGGGGAATTGGAGGTTTTATCAAAGTAAGACAGTATGATCAGATACTTATAGAAATTTGTGGAAAAAGGGCCATAGGTACAGTATTAGTAGGACCTACACCTGTCAACATAATTGGACGAAATATGTTGACTCARATTGGYTGTACATTAAATTTTGAGATGGAAAAGGAAGGAAAAATTTCAAAAATTGGGCCTGAAAATCCATACAATACTCCAATATTTGCCATAAAGAAAAAAGATAGTACTAAATGGAGAAAATTAGTAGATTTCAGAGAACTCAAAAGAACTCAAGAYTTCTGGGAGGTCCAATTAGGA…
>AUT-110240143
AAGGAAGCTCTATTAGATACAGGAGCAGATGATACAGTATTAGAAGAAATGAGTTTACCAGGAAGATGGAAACCAAAGATGATAGGGGGAATTGGAGGTTTTATCAAAGTAAGACAATATGATCAAATACCCCTAGAAATCTGTGGACATAAAGCTACAGGTACAGTATTAATAGGACCTACGCCTGTCAACATAATTGGAAGAAATCTGTTGACTCAGATTGGCTGCACTTTAAATTTTGAAATGGAAAAGGAAGGGAAAATCTCAAAGATTGGGCCTGAAAATCCATACAATACTCCAGTATTTGCCATAAAAAAGAAAGACAGTACTAAATGGAGAAAGTTAGTAGATTTCAGAGAACTCAAGAGAACTCAAGACTTCTGGGAAGTTCAATTAGGA…
>AUT-110240369
AAGGAAGCTCTATTAGATACAGGAGCAGATGATACAGTATTAGAAGAAATGAATTTGCCAGGAARATGGAGACCAAAAATGATAGGGGGAATTGGAGGTTTTATCAAAGTAAAACAGTATGATCAAATATCCATAGAAATCTGTGGACATAAAGTTGTGGGTACAGTATTAGTAGGACCTACACCTGTCAACATAATTGGAAGAAATCTGTTGACTCARCTTGGTTGCACTTTAAATTTTGARATGGAAAAGGAAGGAAAAATTTCAAAARTTGGGCCTGAAAATCCATATAATACTCCAGTATTTGCCATAAAGAAAAAAGACAGTACTAAATGGAGAAAATTAGTAGATTTCAGAGAACTTAAGAGAACTCAAGATTTCTGGGAAGTTCAATTAGGA…
>AUT-110240371
ATAGAAGCCCTATTAGACACAGGAGCAGATGATACAGTATTAGAAGAAATAAATTTACCAGGAAAATGGAAACCRAAAATGATAGGGGGAATTGGAGGTTTTATCAAAGTAAGACAGTATGATCAAATACYTATAGAAATTTGTGGAAAAAAGGCCATAGGTACAGTRYTAGTAGGACCCACACCYGTCAACATAATTGGACGAAATATGTTGACTCAGATTGGTTGTACTTTAAATTTTGAGATGGAAAAAGAAGGAAAAATTTCAAAAATTGGGCCTGAAAATCCATATAATACTCCAATATTTGCCATAAAGAAAAAAGATAGTACTAAATGGAGGAAATTAGTAGATTTCAGAGAACTCAAAAGAACTCAAGACTTCTGGGAGGTCCAATTAGGG…
>AUT-110240964
AAGGAAGCTCTATTAGATACAGGAGCAGATGATACAGTATTAGAAGAAATGTGTTTGCCAGGAAGATGGAAACCAAAAATGATAGGGGGAATTGGAGGTTTTATTAAAGTAAGACAGTATGATCAGATAGCCATAGAAATTTGTGGACATAAGGCTATAGGTACAGTATTAATAGGACCTACACCTGTCAACATAATTGGAAGGAATCTGTTGACTCAGATTGGTTGTACTTTAAATTTTGAAATGGAAAAGGAAGGAAAAATTTCAAAAATTGGGCCTGAAAATCCATATAATACTCCAGTATTTGCCATAAAGAAAAAAGACAGTACTAAATGGAGAAAATTAGTAGATTTCAGAGAACTTAAGAAAACTCAAGACTTCTGGGAGGTTCAATTAGGA…
>AUT-110241291
AAAGAAGCTCTATTAGATACAGGAGCAGATGATACAGTATTAGAAGAAATGACTTTACCAGGAAAATGGAAACCAAAAATGATAGGGGGAATTGGAGGTTTTATCAAAGTAAAACAATATGAACAGATAAGCATAGAAATTTGTGGACATAAAGCTATAGGTACAGTATTAATAGGACCTACACCTGTCAACATAATTGGAAGGAATCTGTTGACTCAGCTTGGTTGCACTTTAAATTTTGAGATGGAAAAGGAAGGAAAAATTTCAAAAATTGGGCCTGAAAATCCATACAATACTCCAGTGTTTGCCATAAAGAAAAAAGACAGYACTAAATGGAGAAAATTAGTAGATTTCAGAGAACTGAAAAGAACTCAAGACTTCTGGGAAGTCCAAYTAGGA…
>AUT-110241293
AAAGAAGCTCTATTAGATACAGGAGCAGATGATACAGTATTMGAAGACATGAGTTTGCCAGGAAAATGGAAACCAAAAATGATAGGGGGAATTGGAGGCTTTATCAAAGTAAAACAGTATGATCAAGTATGCATAGAAATCTGTGGACATAAAACCATAGGTACAGTATTAATAGGACCTACACCTGTCAACATAATTGGAAGAAATTTGTTGACTCAGCTTGGTTGCACTTTAAATTTTGAAATGGAAAAAGAAGGAAAAATTTCAAGAATTGGGCCTGAAAAYCCATACAATACCCCAATATTTGCCATAAAGAAAAAAGACAGTACTAAGTGGAGAAAATTAGTAGATTTCAGAGAACTTAAGAGGACTCAAGAYTTYTGGGAAGTTCAACTAGGA…
>AUT-110241462
AAGGARGCTCTYTTAGACACAGGAGCAGATGATACAGTATTAGAAGAAATAAATTTGCCAGGAAGATGGAAACCAAAAATGATAGGAGGAATTGGAGGTTTTATYAAAGTAAGACAGTATGATCAAATACTTATAGAAATTTGTGGAAAAAAGGCTATAGGTACAGTACTRGTAGGACCTACACCTGTCAACATAATTGGAAGAAACATGTTGACTCAGCTTGGATGCACACTAAAYTTTGASATGGARAAGGAAGGAAAAATTTCAAAAATWGGGCCTGAAAATCCATATAACACTCCAGTATTTGCYATAAAAAAGAAAGACAGTACTAAGTGGAGAAAATTAGTAGATTTCAGRGAACTCAAAAGAACTCAAGAYTTTTGGGAAGTTCAATTAGGG…
>AUT-110241760
AAGGAAGCTCTATTAGATACAGGAGCAGATGATACAGTATTAGAAGAAATGAATTTGCCAGGAAGATGGAAACCAAAAATGATAGGGGGAATTGGAGGTTTTATCAAAGTAAGACAGTATGAYCAGATACYCATAGAAATYTGTGGACATAAAGCTGTAGGTACAGTATTAGTAGGACCTACCCCTGTCAACATAATTGGAAGAAATCTGTTGACTCAGATTGGCTGTACTTTAAATTTTGAAATGGAAAAGGAAGGGAAAATTTCAAAAATTGGGCCTGAAAATCCATACAATACTCCAGTRTTTGCCATAAAGAAAAAAGAYRGTACTAAATGGAGAAAATTAGTAGATTTCAGAGARCTTAAGAGAACTCAAGATTTCTGGGAAGTTCAATTAGGA…
>AUT-110241765
AAGGAGGCCCTCTTAGACACAGGAGCAGATGATACAGTATTAGAAGAAATAAATTTGCCAGGAAAATGGAAACCAAAAATGATAGGAGGAATTGGAGGYTTTATCAAAGTAAGACAGTATGATCAAATACTTATAGAAATTTGTGGAAAAAAGGCTATAGGTTCGGTATTAGTAGGACCCACACCTGTCAACATAATTGGAAGAAAYATGTTGACTCAGCTTGGRTGCACACTAAATTTTGAAATGGAAAAGGAAGGAAAAATTGAAAAAATTGGGCCTGAGAATCCATATAACACTCCAGTATTTGCCATAAAAAAGAAGGACAGTACTAAGTGGAGGAAATTAGTAGATTTCAGGGAACTCAAAAGAACTCAAGACTTTTGGGAAGTTCAATTAGGA…
>AUT-110242919
AAGGAAGCTCTRTTAGATACAGGAGCAGATGATACAGTATTAGAAGAAATGAATTTGCCAGGCAGATGGAAACCAAAAATGATAGGGGGAATTGGAGGATTTATCAAAGTAARACAGTATGATCAGATAGCCATAGAAATCTGTGGACATAAAGCTATAGGTACAGTATTAGTAGGACCTACACCTGTCAACATAATTGGAAGAAATCTGTTGACTCAGCTTGGCTGCACTTTAAATTTTGAAATGGAAAAGGAAGGAAAAATTACAAAAATTGGGCCTGAAAATCCATAYAATACTCCAGTATTTGCCATAAAGAAAAAAGACAGTACAAAATGGAGRAAATTAGTAGATTTCAGRGAACTTAAAAGAACTCAAGACTTTTGGGAAGTTCAATTAGGA…
>AUT-110242920
AAGGAAGCTCTATTAGATACAGGAGCAGATGATACAGTATTAGAAGACATGGATTTGCCAGGAARATGGAAACCAAAAATGATAGGGGGAATTGGAGGTTTTATCAAAGTAAGACAGTATGATCAGGTACCCATGGAAATCTGTGGGCATAAAGCTATAGGTACAGTCTTAGTAGGACCTACACCTGTCAACATAATTGGAAGGAATCTGTTGACACAACTTGGATGCACTTTAAATTTCGAAATGGAAAAGGAAGGAAAAATYTCAAAAATTGGGCCTGAAAATCCATACAATACTCCAGTATTTGCCATAAAGAAAAAAGACAGTACTAAATGGAGAAAATTAGTAGATTTTAGAGAACTTAAGAAAACTCAAGACTTCTGGGAAGTTCAATTAGGA…
>AUT-110242921
AAGGAAGCTCTATTAGATACAGGAGCAGATGATACAGTATTAGAAGAAATAAGTTTGCCAGGAAAATGGAAACCAAAAATGATAGGGGGAATTGGAGGTTTTATCAAAGTAAGACAGTATGATCAGATACTTGTAGAAATCTGTGGACATAAAGCTATAGGTACAGTATTAGTAGGACCCACACCTGTCAACATAATTGGAAGAAATCTGTTGACTCAGATTGGTTGCACTTTAAATTTTGAAATGGAAAAGGAAGGAAAAATTTCAAAAATTGGGCCTGAAAATCCATACAATACTCCAGTATTTGCCATAAAGAAAAAAGACAGTACCAAATGGAGAAAGTTAGTAGATTTCAGAGAACTTAAGAAAACTCAAGACTTCTGGGAAGTTCAATTAGGA…
>AUT-110242922
AAGGAAGCTCTATTAGATACAGGAGCAGATGATACAGTATTAGAAGAAATGAGTTTGCCAGGAAAATGGAAACCAAAAATGATAGGGGGAATTGGAGGTTTTATCAAAGTAAGACAGTATGAGCAGACAACTGTAGAAATTTGTGGATATAAAACTATAGGTACAGTGTTAATAGGACCTACCCCTGTCAACATAATTGGAAGAAATCTGTTAACTCAGCTTGGTTGCACTTTAAATTTTGAAATGGAAAAGGAAGAAAAAATTTCAAAAATTGGGCCTGAAAATCCATACAATACTCCAGTATTTGCCATAAAGAAAAAAGACAGTACTAAATGGAGAAAACTAGTAGATTTCAGAGAACTTAAGAGAACACAAGACTTCTGGGAAGTTCAATTAGGA…
>AUT-110243335
AAGGAAGCTCTATTAGACACAGGAGCAGATGATACAGTATTAGAAGACATAAATTTACCAGGAAAATGGAAACCAAAAATGATAGGGGGAATTGGAGGTTTTATCAAAGTAAAACAGTATGATAACATAGCCATAGACATTTGTGGACACAAGGCTATAGGTACAGTGTTAATAGGACCTACGCCTGTCAACATAATTGGRAGAAATATGTTGACTCAGATTGGGTGTACATTAAATTTTGAGATGGAAAAGGAAGGAAAAATTTCAAAAATTGGGCCTGAAAATCCATACAATACTCCAGTATTTGCCATAAAGAAAAAAGACAGTACTAAATGGAGAAAATTAGTAGATTTCAGAGAACTTAAAAGAACTCAAGATTTTTGGGARGTTCAATTAGGA…
>AUT-110243682
AAGGAAGCTCTATTAGATACAGGAGCAGATGATACAGTATTAGAAGAAATGAGTTTGCCAGGAAAATGGAAACCAAAAATGATAGGGGGAATTGGAGGTTTTATCAAAGTAAGACAGTATGATCAGATACAAGTAGAAATCTGTGGACATAAAGCTATAGGTACAGTATTAGTAGGACCTACGCCTGTCAACATAATTGGAAGAAATCTGTTGACTCAGCTTGGKTGCACTTTAAATTTTGAAATGGAAAAGGAAGGAAAAATTTCAAAAATTGGGCCTGAAAATCCATAYAATACTCCAGTATTTGCCATAAAGAAAAAAGACAGTACTAAATGGAGAAAATTGGTAGATTTCAGAGAACTTAAGAGAACTCAAGACTTCTGGGARGTCCAATTAGGA…
>AUT-110243683
AAGGAAGCYTTATTAGATACAGGAGCAGATGATACAGTATTAGAAGAAATACAGTTGCCAGGGAGATGGAAACCAAAAATGATAGGGGGAATTGGAGGTTTTATCAAAGTAAGACAGTATGATCAGATACTCATAGAAATTTGTGGACATAAAGCTATAGGTACAGTATTAGTAGGACCTACACCTGTCAACATAATTGGAAGAAACCTGTTGACTCAGATTGGCTGCACTTTAAATTTTGAAATGGAAAAGGAAGGAAAAATTTCAAAAATTGGGCCTGAAAATCCATACAATACTCCAATATTTGCCATAAAGAAAAAAGACAGTACTAAATGGAGAAAATTAGTAGATTTCAGAGAACTTAAGAGAACTCAAGACTTYTGGGAAGTTCAATTAGGR…
>AUT-110243684
AAGGAAGCTCTATTGGATACAGGAGCAGATGACACAGTATTAGARGACATGCATTTACCAGGGAGATGGAAACCAAAAATGATAGGGGGAATTGGAGGTTTTATCAAAGTAAAACAGTATGATCAGATACCCATAGAGATCTGTGGACATAAAGCTATAGGTACAGTRTTAGTAGGACCTACTCCTGTCAACATAATTGGAAGAAATCTGTTGACTCAGATTGGCTGCACTTTAAATTTTGARATGGAAAAGGAAGGGAAAATTTCAAAAATTGGGCCTGAAAATCCATACAATACTCCAGTGTTTGCCATAAAGAAAAAAGACGGCACTAAATGGAGAAAATTAGTAGATTTCAGAGAACTTAAGAGAACTCAAGACTTCTGGGAAGTCCAATTAGGR…
>AUT-110243792
AAGGAAGCTCTATTAGATACAGGAGCAGATGATACAGTATTAGAAGAAATGGATTTGCCAGGAAGATGGAAACCAAAAATGATAGGGGGAATTGGAGGTTTTATCAAAGTAAGACAGTATGATCAGATAGTCATAGAAATTTGTGGACATAAAGCTATAGGTACAGTATTAATAGGACCTACACCTGTCAACATAATTGGAAGAAATCTGTTGACTCAGCTTGGCTGTACTTTAAATTTTGAAATGGAAAAGGAAGGAAAAATTTCAAAAATTGGGCCTGAAAATCCATACAATACTCCAGTATTTGCCATAAAGAAAAAAGACAGTACTAAATGGAGAAAATTAGTAGATTTCAGAGAACTTAAGAGAACTCAAGACTTCTGGGAAGTTCAATTAGGA…
>AUT-110244648
AAAGAAGCTCTATTAGATACAGGAGCAGATGATACAGTATTAGAAGAYATAGATTTGCCAGGAAAATGGAAACCAAAAATGATAGGGGGAATTGGAGGTTTTATCAAAGTAAGACAGTATGATCAAATAGTTATAGAAATTTGTGGACAAAAGGCTATAGGTACAGTATTAGTAGGACCTACACCTGTCAACATAATTGGAAGAAACATGTTGACYCAGATTGGYTGTACTTTAAATTTTGAAATGGAAAAGGAAGGRAAAATTTCAAGAATTGGGCCTGAAAATCCATACAATACTCCAATATTTGCAATAAAGAAAAARGATAGCACTAAATGGAGGAAATTAGTAGATTTCAGAGARCTCAAAAGAACACAAGAYTTTTGGGAAGTTCAATTAGGR…
>AUT-110245492
ATAGAAGCCCTATTAGATACAGGAGCAGATGATACAGTATTAGAAGAAATAAATTTACCAGGGAAATGGAAGCCAAAAATGATAGGGGGAATTGGAGGTTTTATCAAAGTAAGACAATATGATCAGATACCTATAGAAATTTGTGGGAAAAAGGCAGTAGGTACGGTATTAGTAGGGCCTACACCTGTCAACATAATTGGACGAAACATGTTGACTCAGATTGGTTGTACTTTAAATTTTGAAATGGAAAAGGAAGGAAAAATTTCAAAAATTGGGCCTGAAAATCCATACAACACCCCAGTATTTGCCATAAAGAAAAAGGATAGTACTAAATGGAGAAAATTAGTAGATTTCAGAGAACTCAAAAGAACTCAAGACTTCTGGGAGGTCCAATTAGGA…
>AUT-110245599
AAGGAAGCTCTCTTAGATACAGGAGCAGATGATACAGTATTAGAAGAAATAAATTTGCCAGGAAAATGGAAACCAAAAATGATAGGAGGAATTGGAGGTTTTATCAAAGTAAGACAGTATGATCAAATAGTTATAGAAATTTGTGGAAAAAAGGCTATAGGGTCAGTATTAGTAGGACCTACACCTGTCAACATAATTGGAAGAAACATGTTGACTCAACTTGGATGTACACTAAATTTTGAAATGGAGAAGGAAGGAAAAATTACAAAAATTGGGCCTGAAAATCCATATAATACTCCAGTATTTGCCATAAAAAAGAAGGACAGTACTAAGTGGAGAAAATTAGTAGATTTCAGGGAACTTAAAAGAACTCAAGACTTTTGGGAAGTTCAATTAGGA…
>AUT-110246211
ATAGAAGCCCTATTAGACACAGGRGCAGATGATACAGTATTAGARGAAATAAATYTACCAGGGAAATGGAAACCAAAAATGATAGGGGGAATTGGAGGTTTTATCAAAGTAAGACAGTATGATCAGATACTTATAGAAATTTGTGGAAAAAAGGCCATAGGTACAGTGTTAGTAGGACCTACACCTGTCAACATWATTGGACGGAATATGTTGACTCAGATTGGTTGTACTTTAAATTTTGAGATGGAAAAGGAAGGAAAAATTTCAAAAATTGGGCCTGAAAATCCATACAATACTCCAGTTTTTGCCATAAAGAAAAARGATAGTACTAAATGGAGAAAATTAGTAGATTTTAGAGAACTCAAGAGAACTCAAGAYTTCTGGGAGGTTCAATTAGGG…
>AUT-110246217
AAGGAAGCTCTATTAGATACAGGAGCAGATGATACAGTATTAGAAGAAATGAATTTGCCAGGAAGGTGGAAGCCAAAAATGATAGGGGGAATTGGAGGTTTTATCAAAGTAAGACAGTATGATCAGATACCCATAGAAATCTGTGGACATAAAACTGAAGGTACAGTGTTAATAGGACCTACACCTGTCAACATAATTGGAAGAAATCTGTTGACTCAGCTTGGTTGCACTTTAAATTTTGAAATGGAAAAGGAAGGAAAAATTTCAAGAGTTGGACCTGACAATCCATACAATACTCCAGTATTTGCCATAAAGAAAAAAGATAGTACTAAATGGAGAAAATTAGTAGATTTCAGGGARCTTAAGAAAACTCAAGACTTCTGGGAAGTTCAATTAGGA…
>AUT-110247521
AAGGAAGCTCTATTAGATACAGGAGCAGATGATACAGTCTTAGAAGACATGAGTTTGCCAGGAAGATGGAAACCAAAAATGATAGGGGGAATTGGAGGTTTTATCAAAGTAAGACAGTACGATCAGGTACCTTTAGAAATTTGTGGATATAAAGCTGTAGGTACAGTATTAGTAGGACCTACACCTGTCAACATAATTGGAAGAAATCTGTTGACTAAGATTGGCTGTACTTTAAATTTTGAAATGGAAAAGGAAGGAAAAATTTCAAAAATTGGGCCTGAGAATCCATACAATACTCCAGTATTTGCCATAAAGAAAAAAGACAGTACTAAATGGAGAAAATTAGTAGATTTCAGAGAACTTAAAAGAACTCAAGACTTCTGGGAAGTTCAATTAGGA…
>AUT-110247778
AAGGAAGCTCTATTAGATACAGGAGCAGATGATACAGTATTAGAAGAYATGWRTTTGCCAGGAAAATGGAGGCCAAAAATGATAGGGGGAATTGGAGGTTTTATCAAAGTAARRCAGTATGATSAAGTACACATAGAAATCTGTGGAARTAAAGTTATAGGTACAGTATTAATAGGACCTACACCTGTCAACATAATTGGAAGAAACCTGTTGACTCAGCTTGGTTGCACTTTAAATTTTGAAATGGAAAAGGAAGGAAAAATTTCAAAAATTGGGCCTGAGAATCCATATAATACTCCAGTRTTTGCTATAAAGAAAAAAGACAGTRMTAAATGGAGAAAATTAGTAGATTTCAGAGAACTTAAGAAAACTCAAGACTTYTGGGAAGTYCAATTAGGA…
>AUT-110248558
AAAGAAGCTCTATTAGATACAGGAGCAGATGATACAGTATTAGAAGATATAAATTTGCCAGGAAAATGGAAACCAAAAATGATAGGGGGAATTGGAGGTTTTATCAAGGTAAGGCAATATGATCAGATACTTATAGAAATTTGTGGAAAAAAGGCTATAGGTACAGTATTAGTAGGACCTACACCTGTCAACATAATTGGACGAAATATGTTGACTCAGATTGGTTGTACTTTAAATTTCGAGATGGAAGAGGAAGGAAAAATCTCAAAAATTGGGCCTGAAAATCCATACAATACTCCAGTATTTGCTATAAAGAAAAAGGACAGCACCAAATGGAGAAAATTAGTAGATTTCAGAGAGCTCAAAAGAACTCAGGACTTTTGGGAAGTCCAATTAGGA…
>AUT-110248584
AAAGAAGCTCTATTAGATACAGGAGCAGATGATACAGTATTAGAAGACATAGATTTGCCAGGAAAATGGAAACCAAAAATGATAGGGGGAATTGGAGGTTTTATTAAGGTAAGACAGTATGATCARATACTTATAGAAATTTGTGGAAAAAAGGCTATAGGTACAGTATTAGTAGGACCTACCCCTGTCAACATAATTGGAAGAAATATGTTGACTCAGCTTGGTTGTACTTTAAATTTTGAGATGGAAAAGGAAGGAAAAATTTCAAAAATAGGGCCTGAAAATCCATACAATACTCCAGTATTTGCTATAAAGAAAAAGGACAGCACTAAGTGGAGGAAATTAGTAGATTTCAGGGAGCTCAAGAGAACTCARGACTTTTGGGAAGTTCAATTAGGA…
>AUT-110248919
AAGGAAGCTCTATTAGACACAGGAGCAGATGATACAGTATTRGAGGAAATGAGTTTGCCAGGAAAATGGAAACCAAAAATGATAGGGGGAATTGGAGGTTTTATCAAAGTAAGACAGTATGATCAGGTRYCCATAGAAATCTGTGGACATAAAGCTATAGGTACAGTATTAATAGGACCTACACCTGTCAACATAATTGGAAGAAATCTGTTGACYCAGATTGGYTGCACCTTAAATTTTGAAATGGAAAAGGAAGGRAAAATTTCAAGARTWGGGCCTGAAAATCCATACAATACTCCAATATTTGCCATAAAGAAAAAAGACAGTACTAARTGGAGAAAATTAGTAGATTTCAGAGAACTTAAGAGAACTCAGGACTTCTGGGAGGTTCAGTTAGGA…
>AUT-110249026
AAGGAAGCTCTATTAGATACAGGAGCWGATGATACAGTCTTAGAAGAAATGAATTTGCAAGGAAGATGGAAACCAAAAATGATAGGGGGAATTGGAGGATTTATCAAAGTAAGACAGTATGATCAGATACCCATAGAAATCTGTGGACATAAAGCTATAGGTACAGTATTAGTAGGACCTACACCTGTCAACATAATTGGAAGAAATCTGTTGACTCAGATTGGTTGCACTTTAAATTTTGAAATGGAAAAGGAAGGAAAAATTTCAAAAATTGGGCCTGAAAATCCATACAATACTCCAGTATTTGCAATAAAGAAAAAAGACAGTACWAAATGGAGGAAATTAGTAGATTTCAGAGAGCTTAAGAGAACTCAGGACTTCTGGGAAGTTCAATTAGGA…
>AUT-110249636
AAGGAAGCTCTATTAGATACAGGAGCAGATGATACAGTAGTAGAAGAAATGAGTTTACCAGGAAGATGGAAACCAAAAATGATAGGGGGAATTGGAGGTTTTATCAAAGTAAGACAGTATGATCAGATACAAATAGAAATCTGYGGKCACAAAGCTATAGGTACAGTATTAGTAGGACCTACACCTGTCAACATAATTGGAAGAAACCTGTTGACTCAAATTGGATGCACTTTAAATTTTGAAATGGAAAAGGAAGGAAAAATTTCAAAAATTGGGCCTGAAAATCCATACAATACTCCAGTGTTTGCCATAAAGAAAAAAGRTAGCACTAAATGGAGAAAATTAGTAGATTTCAGAGAACTTAAGAGAACTCAAGACTTCTGGGAAGTTCAATTAGGA…
>AUT-110249637
AAGGAAGCTCTATTAGATACAGGAGCAGATGATACAGTATTAGAAGAAATGAATTTGCCAGGAAGATGGAAACCAAAAATGATAGGGGGAATTGGAGGTTTTATCAAAGTAAGACAGTATGATCAGATATCTGTAGAAATATGTGGACATAAAGCTATAGGTACAGTATTARTAGGACCTACACCTGTCAACATARTTGGAAGAAATCTGTTGACTCAGATTGGTTGTACTTTAAATTTTGAAATGGAAAAGGAAGGAAAAATTTCAAGAATTGGGCCTGAAAATCCATACAATACTCCAGTATTTGCCATAAAGAAAAAAGACAGTACTAAATGGAGAAAATTAGTAGATTTCAGAGAACTTAAAAGAACTCAAGACTTCTGGGAGGTTCAATTAGGA…
>AUT-110249761
AAGGAAGCTCTATTAGATACAGGAGCAGATGATACAGTATTAGAAGAMATGAATWTRCCAGGAAAATGGAGGCCAAAAATGATAGGGGGAATTGGAGGTTTTATCAAAGTAAGACAGTATGATCAAGTACACATAGAAATCTGTGGAAKTAAAGTTATAGGTACAGTATTAATAGGACCCACACCTGTCAACATAATTGGAAGAAATCTGTTGACTCAGCTTGGTTGCACTTTAAATTTTGAAATGGAAAAGGAAGGRAAAATTTCAAAAATTGGGCCTGAGAATCCATATAATACYCCAGTGTTTGCTATAAAGAAAAAAGACAGTACTAAATGGAGAAAATTAGTAGATTTCAGAGAACTTAAGAGAACTCAAGATTTCTGGGAAGTTCAATTAGGA…
>AUT-110249904
AAGGAAGCTCTATTAGATACAGGAGCAGATGATACAGTATTAGAAGAAATGAATTTGCCAGGAAGATGGAAACCRAAAATGATAGGGGGAATTGGAGGTTTTATCAAAGTAAGACARTATGATCAGGTAGTCATAGAAATTTGTGGACATAAAGCTATAGGTACAGTATTAGTAGGACCTACACCTGTCAACATAATTGGAAGAAATCTGTTGACTCAGATTGGTTGCACTTTAAATTTTGAAATGGAAAAAGAAGGGAAAATATCTAAAATTGGGCCTGAAAATCCATATAATACTCCAGTATTTGCCATAAAGAAAAAAGACAGTACTAAATGGAGAAAATTAGTAGATTTCAGAGAACTTAAGAGAACTCAAGATTTCTGGGAAGTTCAATTAGGA…
>AUT-110249905
ATAGAAGCCCTATTAGACACAGGRGCAGATGATACAGTATTAGAAGACATAAATTTACCAGGAAAATGGAGGCCAAAAATGATAGGGGGAATTGGAGGTTTTATCAAAGTAAGGCAGTATGATCAGATACTTATAGAAATTTGTGGAAAAAAGGCCATAGGTACAGTATTAGTAGGACCTACACCTGTCAACATAATTGGACGAAATATGTTGACTCAGATTGGTTGTACTCTAAATTTTGAGATGGAAAAGGAAGGAAAAATTTCAAAAATTGGGCCTGAAAATCCATACAATACTCCAATATTTGCCATAAAGAAAAAAGATAGTACTAAATGGAGAAAATTAGTAGATTTCAGAGAACTCARGAGAACTCAAGACTTCTGGGAGGTCCAATTAGGA…
>AUT-110249984
AAGGAAGCTCTRTTAGATACAGGAGCAGATGATACAGTRTTAGAAGAAATGAATTTGCCAGGAAAATGGAGGCCAAAAATGATAGGGGGAATTGGAGGTTTTATCAAAGTAAGACAGTATGATCAAGTACACATAGAAATCTGTGGAAGTAAAGTTATAGGTACAGTATTAATAGGACCTACACCTGTCAACATAATTGGAAGAAATCTGTTGACTCARCTTGGTTGCACYTTAAATTTTGAAATGGAAAAGGAAGGGAAAATTTCAAAAATTGGGCCTGAGAATCCATATAATACTCCAGTGTTTGCTATAAAGAAGAAAGACAGTACTAAATGGAGAAAATTAGTAGATTTCAGAGAACTTAAGAAAACTCAAGACTTCTGGGAAGTTCAATTAGGA…
>AUT-110253186
AAGGAAGCTCTATTAGATACAGGAGCAGATGATACAGTATTAGAAGAAATGAATTTGCCAGGGAGGTGGAAGCCAAAAATGATAGGGGGAATTGGAGGTTTTATCAAAGTAAGACAGTATGATCAGATACCCATAGAAATTTGTGGACATAAAGCTATAGGTACAGTATTAATAGGACCTACACCTGTCAACATAATTGGAAGAAATCTGTTGACTCAGCTTGGTTGCACTTTAAATTTTGAACTAGAGAAGGAAGGAAAAATTTCAAGAATTGGGCCTGAGAATCCATATAATACACCAATATTTGCCATAAAGAAAAAGGACAGTACTAAATGGAGAAAACTAGTAGATTTCAGAGAACTTAAGAGAACTCAAGACTTCTGGGAAGTTCAATTAGGA…
>AUT-110253844
ATAGAAGCCCTATTAGACACAGGAGCAGATGATACAGTGTTAGAAGAAATAAATTTACCAGGAAAATGGAAGCCAAAAATGATAGGGGGAATTGGAGGTTTTATCAAAGTAAGACAGTATGATCAGATACTTATAGAAATTTGTGGAAAAAAGGCCATAGGCACAGTATTGGTAGGACCTACACCTGTCAACATAATTGGACGAAATATGTTGACTCAGATTGGTTGTACTTTAAATTTTGAGATGGAAAAGGAAGGAAAAATTTCAAAAATTGGGCCTGAAAATCCATACAATACTCCAGTATTTGCCATAAAGAAAAAAGATAGTACTAAGTGGAGAAAATTGGTAGACTTCAGAGAACTCAAAAGAACTCAAGACTTTTGGGAAGTTCAATTAGGA…
>AUT-110254238
RTAGAAGCCCTRTTAGACACAGGAGCAGATGATACAGTATTAGAAGAAATAAATTTACCAGGAAAATGGAAACCAAAAATGATAGGGGGAATTGGAGGGTTTATCAAAGTAAGACAATATGATCAGATAATTATAGAAATTTGTGGAAAAAAGGCCATAGGTTCGGTATTAGTAGGACCTACACCTGTCAACATAATTGGCAGAAATATGTTGACTCAGATTGGTTGTACTTTAAATTTGGAAATGGAACAGGAAGGAAAAATTTCAAAAATTGGGCCTGAAAATCCATATAATACTCCAGTATTTGCCATAAAGAAAAAAGATAGTACTAAATGGAGAAAATTAGTAGATTTCAGGGAACTCAAAAGAACTCAAGACTTCTGGGAGATCCAATTAGGA…
>AUT-110254497
AAGGAAGCTCTATTAGATACAGGAGCAGATGATACAGTATTAGAAGAAATGGATTTRCCAGGAAGRTGGAAACCAAAAATGATAGGGGGAATTGGAGGTTTTATCAAAGTAAGACAGTATGATCAGATASTCATAGAAATTTGTGGACATAAAGCTATAGGTACAGTATTARTAGGACCTACACCTGTCAACATAATTGGAAGAAATCTGTTGACTCAGCTTGGCTGTACTTTAAATTTTGAAATGGAAAAGGAAGGAAAAATTTCAAAAATTGGGCCTGAAAATCCATACAATACTCCAGTRTTTGCCATAAAGAAAAAAGACAGTACTAAATGGAGAAAATTAGTAGATTTCAGAGAACTTAAGAGAACTCAAGACTTCTGGGAAGTTCAATTAGGA…
>AUT-110254498
AAAGAAGCTCTATTAGATACAGGAGCAGATGATACRGTATTTGAAGAKATAAATTTGCCAGGAAAATGGAAACCAAAAATGATAGGGGGAATTGGAGGTTTTATCAAGGTAAARCAATATGATCAGATACTTATAGAAATTTGTGGAAAAAAGGCTATCGGTACAGTGTTAGTAGGACCTACACCTGTCAACATAATTGGACGAAATATGTTGACTCAGGTTGGTTGTACTTTAAATTTCGAGATGGAAGAGGAAGGAAAAATCTCAAAAATTGGGCCTGAAAATCCATACAATACTCCARTATTTGCTATAAAGAAAAAGGACAGCACYAAATGGAGGAAATTAGTAGATTTCAGAGAGCTMAAAAGAACTCAGGACTTTTGGGAAGTTCAATTAGGA…
>AUT-110254509
ATAGAAGCCCTATTAGACACAGGAGCAGATGATACAGTRTTAGAAGAAATAAATTTACCAGGAAAATGGAAGCCAAAAATGATAGGGGGAATTGGAGGTTTTATCAAAGTAAGACAGTATGATCAGATACTTATAGAAATTTGTGGAAAAAAGGCCATAGGCACAGTATTAGTAGGACCTACACCTGTCAACATAATTGGACGAAATATGTTGACTCAGATTGGTTGTACTTTAAATTTTGAGATGGAAAARGAAGGAAAAATTTCAAAAATTGGGCCTGAAAATCCATACAATACTCCAGTATTTGCCATAAAGAAAAAAGATAGTACTAAGTGGAGAAAATTGGTAGACTTCAGAGAACTCAAAAGAACYCAAGACTTTTGGGAAGTYCAATTAGGA…
>AUT-110254757
AAGGAAGCTCTATTAGATACAGGAGCAGATGATACAGTATTAGAAGAAATGAATTTGCCAGGAAGATGGAAACCAAAAATGATAGGGGGAATTGGAGGTTTTATCAAAGTGAGACAGTATGATCAGATACCCATAGAAATCTGTGGACATAAAGCTATAGGTACAGTATTAATAGGACCTACACCTGTCAACATAATTGGAAGAAATCTGTTGACTCAACTTGGTTGCACTTTAAATTTTGAAATGGAAAAGGAAGGAAAAATTTCAAAAATTGGGCCTGAAAATCCATACAACACTCCAGTATTTGCCATAAAGAAAAARGACAGTACTAAATGGAGAAAATTAGTAGATTTTAGAGAACTTAARAGAACTCAAGACTTCTGGGAAGTTCAATTAGGA…
>AUT-110254963
AAGGAAGCTCTATTAGATACAGGAGCAGATGATACAGTATTAGAAGATATAAATTTGCCAGGGAAATGGAAACCAAAAATGATAGGGGGAATTGGAGGTTTTATCAAAGTAAAACARTATGATCAAATAGCCATAGAAATTTGTGGACACAAGGCTATAGGTACAGTRTTAGTAGGACCTACACCTGTCAACATAATTGGAAGRAACCTGTTGACTCAGATTGGATGCACTTTAAATTTTGARATGGARAARGAAGGAAAAATTTCAAAAATTGGGCCTGAMAATCCATACAATACTCCAGTATTTGCCATAAAGAAAAAAGAYAGTRCTAAATGGAGAAAATTAGTAGATTTTAGRGAACTTAAAAGAACTCAGGATTTTTSRGAAGTTCAATTAGGA…
>AUT-110255038
AAAGAGGCTCTACTAGATACAGGAGCAGATGATACAGTATTAGAAGACATAAATTTGCCAGGGAAATGGAAACCAAAAATGATAGGAGGAATTGGAGGTTTTATYAAAGTAAGAGAGTATGAAGAAATACCCATAGAAATTTGTGGAAAAAARGCTATAGGTACAGTATTAGTGGGACCTACACCTATCAACATAATTGGGAGAAATATGTTGACACAGCTTGGATGTACACTAAATTTTGATATGGAAAAGGAAGGAAAAATTACAAAAATTGGGCCTGAAAATCCATATAACACTCCAATATTTGCCATAAAAAAGAAGGACAGTACTAAGTGGAGAAAATTAGTAGATTTCAGGGAACTCAAAAGAACTCAAGACTTTTGGGAAGTTCAATTAGGA…
>AUT-110255039
AAGGAAGCTTTATTAGATACRGGAGCAGATGATACAGTATTAGAAGAAATACAGTTGCCAGGGAGATGGAAACCAAAAATGATAGGGGGAATTGGAGGTTTTATCAAAGTAAGACAGTATGATCAGATACTCATAGAAATTTGTGGACATAARGCTATAGGTACAGTATTAGTAGGACCTACACCTGTCAACATAATTGGAAGAAACCTGTTGACTCAGATTGGCTGCACTTTAAATTTTGAAATGGAAAAGGAAGGAAAAATTTCAAAAATTGGGCCTGAAAATCCATACAATACTCCAATATTTGCCATAAGGAAAAAAGACAGTACTAAATGGAGAAAATTAGTAGATTTCAGAGAACTTAAGAGAACTCAAGACTTCTGGGAAGTTCAATTAGGA…
>AUT-110255041
AAGGAAGCTCTATTAGATACAGGAGCAGATGATACAGTATTAGAAGACATGCAGTTGCCAGGAAAATGGAAACCAAAAATGATAGGGGGAATTGGAGGTTTTATCAAAGTAAGACAGTATGATCAGATATGCATAGAAATATGCGGACATAAAGCTATAGGTACAGTATTAGTAGGACCTACACCTATCAACATAATTGGAAGAAATCTGTTGACTCAAATTGGCTGTACTTTAAATTTTGAAATGGAAAAGGAAGGAAAAATTTCAAAAATTGGGCCTGAAAATCCATACAATACTCCAGTATTTGCCATAAAGAAAAAAGATAGTACTAAATGGAGAAAATTAGTAGAYTTCAGGGAACTTAAGAGAACTCAAGACTTYTGGGAAATTCAATTAGGG…
>AUT-110255045
AAGGAAGCTCTATTAGATACAGGAGCAGATGATACAGTATTAGAAGAAATGAATTTGCCAGGAAAATGGAAACCAAAAATGATAGGGGGAATTGGAGGTTTTATCAAAGTAAGACAATATGATCAGATACTTGTAGAAATCTGTGGGCATAAAGCTATAGGTACAGTATTAGTAGGACCTACACCTGTCAACATAATTGGAAGRAATCTGTTGACTCAGCTTGGATGCACAYTAAATTTTGAAATGGAAAAGGAAGGAAAAATTTCAAAAATWGGGCCTGARAACCCATACAATACTCCAGTATTTGCCATAAAGAAAAAAGACAGTACTAAATGGAGAAAATTAGTAGATTTCAGAGAGCTTAARAGAACTCAAGACTTCTGGGAAGTTCAATTAGGA…
>AUT-110255046
AAGGAAGCTCTATTAGATACAGGAGCAGATGATACAGTATTAGAAGAAATGAATTTGCCAGGAAGATGGAAACCAAAAATGATAGGGGGAATTGGAGGTTTTATCAARGTGAAACAGTATGAACAAATAGCAGTAGAAATCTGTGGACATAAAGCTGTAGGTACAGTRTTAGTAGGACCTACACCTGTCAACATAATTGGAAGAAATCTGTTGACTCAGATTGGCTGTACTTTAAATTTTGAAATGGAAAAGGAAGGAAAAATTTCAAAAATTGGGCCTGAAAATCCATACAATACTCCAGTATTTGCCATAAAGAAAAARGAYGGTAATAAATGGAGAAAATTAGTAGACTTCAGAGAACTTAAGAGAACTCAAGACTTCTGGGAAGTTCAGTTAGGA…
>AUT-110255047
AAGGAAGCTCTATTAGATACAGGAGCAGATGATACAGTATTAGAAGAAATGAGTCTACCAGGAAAATGGAAACCAAAAATGATAGGGGGAATTGGAGGTTTTATCAAAGTAAAACAGTATGATCAGATACCAATAGAAATTTGTGGACATAAAGTTATAGGTACAGTATTAGTAGGACCTACACCTGTCAACATAATTGGAAGAAATCTGTTGACTCAGCTTGGATGCACTTTAAATTTTGAAATGGAAAAGGAAGGAAAAATTTCAAAGATTGGACCTGAAAATCCCTACAATACTCCAGTATTTGCCATAAAGAAAAAAGACAGTACTAAATGGAGAAAATTAGTAGATTTCAGAGAACTTAAGAGAACTCAAGACTTCTGGGAAGTTCAATTGGGA…
>AUT-110255048
AAGGAAGCTCTATTAGATACAGGAGCAGATGATACAGTATTAGAAGAAATGARTTTGCCAGGAAGATGGACACCAAAAATGATAGGGGGAATTGGAGGTTTTATCAAAGTAAGACAGTATGAACAGGTACCTGTAGAAATTTGTGGACATAAAGCTATAGGTACAGTATTAGTAGGACCTACACCAGTCAACATAATTGGAAGAAATCTGTTGACTCAGGTTGGCTGTACGTTAAATTTTGAAATGGAAAAGGAAGGGAAAATTTCAAAAATTGGGCCTGAGAATCCATATAATACTCCAGTATTTGCCATAAAGAAAAAAGACAGTACTAAATGGAGAAAACTAGTAGATTTCAGAGAACTTAAGAGAACTCAAGACTTCTGGGAAGTTCAATTAGGA…
>AUT-110255049
AAGGAAGCTCTATTAGATACAGGAGCAGATGATACAGTATTAGAAGAAATGAGTCTACCAGGAAAATGGAAACCAAAAATGATAGGGGGAATTGGAGGTTTTATCAAAGTAAAACAGTATGATCAGATACCAATAGAAATTTGTGGACATAAAGTTATAGGTACAGTATTAGTAGGACCTACACCTGTCAACATAATTGGAAGAAATCTGTTGACTCAGCTTGGATGCACTTTAAATTTTGAAATGGAAAAGGAAGGAAAAATTTCAAAGATTGGACCGGAAAATCCCTACAATACTCCAGTATTTGCCATAAAGAAAAAAGACAGTACTAAATGGAGAAAATTAGTAGATTTCAGAGAACTTAAGAGAACTCAAGACTTCTGGGAAGTTCAATTGGGA…
>AUT-110255064
AAGGAAGCTCTATTAGATACAGGAGCAGATGATACAGTATTAGAAGACATGGATTTGCCAGGAAGATGGAAACCAAAAATGATAGGGGGAATTGGAGGTTTTATCAAAGTAAGACAGTATGATCAGGTACCCATGGAAATCTGTGGGCATAAAGCTATAGGTACAGTCTTAGTAGGACCTACACCTGTCAACATAATTGGAAGGAATCTGTTGACACAAATTGGATGCACTTTAAATTTCGAAATGGAAAAGGAAGGAAAAATTTCAAAAATTGGGCCTGAAAATCCATACAATACTCCAGTATTTGCCATAAAGAAAAAAGACAGTACTAAGTGGAGAAAATTAGTAGATTTTAGAGAACTTAAGAAAACTCAAGACTTCTGGGAAGTTCAATTAGGA…
>AUT-110255651
AAGGAGGCTCTCTTAGATACAGGAGCAGATGATACAGTATTAGAAGACATAAATTTGCCAGGAAAATGGAAACCAAGAATGATAGGAGGAATTGGAGGTTTTATCAAAGTAAAACAATATGATCAAATACATATAGAAATTTGTGGAAAAAAGGCTATAGGTACAGTATTAGTAGGACCTACACCTGTCAACATAATTGGAAGAAATATGTTGACTCAGCTTGGATGCACACTAAATTTTGAAATGGAAAAGGAAGGAAAAATTACAAAAATTGGGCCTGATAACCCATATAACACTCCAGTATTTGCCATAAAAAAGAAGGACAGTACTAAGTGGAGAAAATTAGTAGATTTCAGGGAACTCAAAAGAACTCAAGACTTTTGGGAAGTTCAATTAGGA…
>AUT-110255654
AAGGAAGCTCTATTAGATACAGGAGCAGATGATACAGTATTAGAAGAAATGAGTTTACCAGGAAGATGGAAACCAAAAATGATAGGGGGAATTGGAGGTTTTATCAAAGTAAGACAGTACGATCAGATACTCATAGAAATCTGTGGACAAAAGGCTATAGGTACAGTATTAGTAGGACCTACCCCTATCAATATAATTGGAAGAAATTTGTTGACTCAGATTGGTTGCACTTTAAATTTTGAGATGGAAAAAGAAGGAAAAATTTCAAAAATTGGGCCTGAAAACCCATACAATACTCCAGTATTTGCCATAAAGAAAAAAGATAGTACTAAGTGGAGAAAATTAGTAGATTTCAGAGAACTTAAGAGAACTCAAGACTTCTGGGAGGTTCAATTAGGA…
>AUT-110256189
AAGGAAGCTCTATTAGATACAGGAGCGGATGATACAGTATTAGAAGATATGGATTTGCCAGGAAGATGGAAACCAAAAATGATAGGGGGAATTGGAGGTTTTATCAAAGTAAGACAGTATGATCAGATACCCTTAGAAATCTGTGGACATAAAGCTATCGGTACAGTATTAGTAGGACCCACACCTGTCAACATAATTGGAAGAAACCTGTTGACGCAGATTGGTTGCACTTTAAATTTTGAAATGGAAAAAGAAGGAAAAATTTCAAAAATTGGGCCTGAAAATCCATATAATACTCCAGTATTTGCCATAAAGAAAAAGGACAGTACTAAATGGAGAAAATTAGTAGATTTCAGAGAACTTAAAAGAACTCAAGACTTCTGGGAAGTTCAATTAGGA…
>AUT-110256192
AAGGAGGCTCTCTTAGATACAGGAGCAGATGATACAGTATTAGAAGACATAAATTTGCCAGGAAAATGGAAACCAAGAATGATAGGAGGAATTGGAGGTTTTATCAAAGTAAAACAATATGATCAAATACATATAGAAATTTGTGGAAAAAAGGCTATAGGTACAGTATTAGTAGGACCTACACCTGTCAACATAATTGGAAGAAATATGTTGACTCAGCTTGGATGCACACTAAATTTTGAAATGGAAAAGGAAGGAAAAATTACAAAAATTGGGCCTGATAACCCATATAACACTCCAGTATTTGCCATAAAAAAGAAGGACAGTACTAAGTGGAGAAAATTAGTAGATTTCAGGGAACTCAAAAGAACTCAAGACTTTTGGGAAGTTCAATTAGGA…
>AUT-110256682
AAGGAAGCTCTATTAGATACAGGAGCAGATGATACAGTACTAGAAGAAATGTGTTTGCCAGGGAGATGGAAACCAAAAATGATAGGGGGAATTGGAGGTTTTATCAAAGTAAGACAGTATGATCAGGTACAATTAAAAATATGTGGACATAAAGCTATAGGTACAGTATTAGTAGGACCTACACCTGTCAACATAATTGGAAGAAATCTGTTGACTCAGATTGGTTGCACTYTAAATTTTGAAATGGAAAAGGAAGGRAAAATTTCAAAAATTGGGCCTGAAAATCCATACAATACTCCAGTATTTGCCATAAAGAAAAAAGATGGTACTAAATGGAGAAAATTAGTAGATTTYAGRGAACTTAAGAGAACTCAAGACTTCTGGGAAGTTCAATTAGGG…
>AUT-110256769
AAGGAAGCTCTATTAGATACAGGAGCAGATGATACAGTATTAGAAGACATGAGTTTGCCAGGAAAATGGAAACCAAAAATGATAGGGGGAATTGGAGGTTTTATCAAAGTAAGACAGTATGATCAGATAKCTRTAGAAATCTGYGGACACAAAGCTATAGGTACAGTATTAGTAGGACCTACACCTGTCAACATAATTGGAAGAAACCTGTTGACTCAGATTGGCTGCACTTTAAACTTTGAGATGGAAAAGGAAGGAAAAATTTCAAAAATTGGGCCTGAAAATCCATACAATACTCCAGTATTTGCCATAAAGAAAAAAGACAGTACTAAATGGAGAAAATTAGTAGATTTYAGAGAACTTAARAGAACTCAAGACTTCTGGGAAGTTCAATTAGGA…
>AUT-110257225
AAGGAAGCTCTATTAGATACAGGAGCAGATGATACAGTAYTAGAAGAAATGAATTTGCCAGGAARATGGAAACCTAAAATGATAGGAGGAATTGGAGGTTTTATCAAAGTAAGACAGTATGAWCAAATAYYAGTAGAAATCTRTGGACATAAAGCCATAGGTACAGTATTAGTAGGACCTACACCTGTCAACATAATTGGAAGAAATCTGTTGACTCAGATTGGTTGCACTCTAAATTTTGAAATGGAAAAGGAAGGAAAAATTTCAAAAATTGGGCCTGAAAATCCATAYAATACTCCAGTATTTGCCATAAAGAAAAAAGACAGTACTAAATGGAGAAAATTAGTAGATTTCAGAGAACTTAAGAGAACTCAAGACTTCTGGGAAGTTCAATTAGGA…
>AUT-110258466
AAGGAAGCTCTATTAGATACAGGAGCAGATGATACAGTATTAGAAGAAATGACTTTACCAGGRAGATGGAAACCAAAAATGATAGGGGGAATTGGAGGTTTTATCAAAGTAAAACAATATGAKAATATAACTRTGGACATTTGTGGACACAAAGCGATAGGTACAGTATTAGTAGGACCTACACCTGTCAACATAATTGGAAGAAATCTGTTGACTCAGCTTGGTTGCACTTTAAATTTTGAATTGGAAAATGAMGGAAAAATTTCAAAAATTGGGCCTGAGAATCCATATAATACTCCAGTATTTGCCATAAAGAAAAAAGACAGTACTAAATGGAGAAAATTAGTAGATTTCAGAGAACTTAAGAGAACTCAAGAYTTCTGGGAAGTTCAATTAGGA…
>AUT-110258843
ATAGAAGCTCTATTAGACACAGGAGCAGATGATACAGTATTAGAAGAAATAAATTTACCAGGAAAATGGAAACCAAAAATGATAGGGGGAATTGGAGGKTTTATCAAAGTAAGACAATATGATCAGATACTTATAGAAATTTGTGGAAAAAAGGCCATAGGTACGGTATTAGTAGGACCTACACCTRTCAACATAATTGGACGAAATATGTTGACTCAGATTGGTTGTACTTTAAATTTTGAGATGGAAAAGGAGGGAAAAATTTCAAAAATTGGGCCTGAAAATCCATACAATACTCCAGTATTTGCCATAAAGAAAAAAGAYAGTACYAAATGGAGAAAATTAGTAGAYTTCAGAGAACTCAAGAGAACTCAAGACTTCTGGGAGGTCCAATTAGGA…
>AUT-110258920
AAGGAAGCTCTATTAGATACAGGAGCAGATGATACAGTATTAGAAGAAATGAATTTGCCAGGAAAATGGAGACCAAAAATGATAGGGGGAATTGGAGGTTTTATCAAAGTAAGACAGTATGACCAGATACCAGTAGAAATCTGTGGACATAAAGCTGTARGTACAGTATTAGTAGGGCCTACACCTGTCAACATAATTGGAAGAAATCTGTTGACTCAGATTGGATGTACTTTAAATTTTGAAATGGAAAAGGAAGGAAAAATTTCAAGAATTGGGCCTGAAAATCCATACAATACTCCAGTATTTGCCATAAAGAAAAAAGACAGTACTAAATGGAGGAAATTAGTAGATTTTAGAGAACTTAAGAGAACTCAAGACTTYTGGGAAGTTCAATTAGGA…
>AUT-110258921
AAAGAAGCTCTGTTAGATACAGGAGCAGATGATACAGTATTAGAAGACATAAATTTGCCAGGAAAATGGAAACCAAAAATGATAGGGGGAATTGGAGGTTTTATCAAGGTAAGACAGTATGATCAGATACTTATAGAAATTTGTGGAAAAAAGGCTATAGGTACGGTATTAGTAGGACCTACCCCTGTCAACATAATTGGAAGAAATATGTTGACTCAGCTTGGTTGTACTTTAAATTTCGAGATGGAAAAGGAAGGAAAAATTTCAAAAATTGGGCCTGAAAATCCATACAATACTCCAGTATTCGCTATAAAGAAAAAGGACAGCACTAAGTGGAGGAAATTAGTAGATTTCAGGGAGCTCAAAAGAACTCAAGACTTTTGGGAAGTTCAATTAGGA…
>AUT-110259144
AAAGAAGCTCTATTAGATACAGGAGCAGATGATACAGTATTAGAAGAYATAGAGTTGCCAGGAAAATGGAAACCAAAAATGATAGGGGGAATTGGAGGTTTTATCAAAGTAAGACAGTATGATCARATACTTATAGAAATTTGTGGAAAAAAGGCTATAGGTACAGTATTAGTAGGACCTACCCCTGTCAACATAATTGGAAGAAATATGTTGACTCAGATTGGTTGTACTTTAAATTTTGAAATGGAAAAGGAAGGAAAAATTTCAAAAATTGGGCCTGAAAATCCATACAATACTCCAGTATTTGCTATAAAGAARAAGGATGGCACTAAGTGGAGAAAATTAGTAGATTTCAGGGAGCTCAAAAGAACTCAGGATTTTTSGGAAGTKCAATTAGGG…
>AUT-110259246
AAGGAAGCTCTATTAGATACAGGAGCAGATGATACAGTATTAGAAGAAATAGATTTRCCAGGAARATGGAARCCAAAAATGATAGGGGGAATTGGAGGTTTTATCAAAGTAAGRCAGTATGATCAGATAACCATAGAAATTTGTGGACATAAAGCTAYAGGTACAGTATTAGTAGGACCTACACCTGTCAACATAATTGGAAGAAATCTGTTGACTCAGCTTGGTTGTACTTTAAATTTTGAAATGGAAAAGGAAGGAAAAATTTCAAAAATTGGGCCTGAAAATCCATACAATACTCCAGTATTTGCCATAAAGAAAAAAGACAGTACTAAATGGAGAAAATTAGTAGATTTCAGAGAACTTAAGAGAACTCAAGACTTYTGGGAAGTTCAATTAGGA…
>AUT-110259520
AAGGAAGCTCTATTAGATACAGGAGCAGATGATACAGTATTAGAAGAAATGAATTTGTCAGGAAAATGGAAACCAAAAATGATAGGGGGAATTGGAGGTTTTATCAAGGTAAGACAGTATGAGCAGGTACCCATAGAAATCTGTGGCCATAAAGTTATAGGTACAGTATTAGTAGGACCTACACCTGTCAACATAATTGGAAGAAATCTGTTGACTCAGCTTGGTTGCACTTTAAATTTTGAAATGGAAAARGAAGGAAAAATTTCAAAAATAGGGCCTGAAAATCCATACAATACGCCAGTATTYGCTATAAAGAAAAAAGAYAGTACTAAATGGAGAAAATTAGTAGATTTCAGAGAACTTAAGAGAACCCAAGACTTCTGGGAAGTTCAATTAGGA…
>AUT-110259521
AAGGAAGCTCTATTAGATACAGGAGCAGATGATACAGTGTTAGGGGAAATGAATTTGCCAGGAAGATGGAAACCAAAAATGATAGGGGGAATTGGAGGTTTTATCAAAGTAAGACAGTATGATCAGATAACCATAGAAATCTGTGGCCATAAAGCGACAGGTACAGTATTAATAGGACCTACACCTGTCAACATAATTGGAAGAAATCTGTTGACCCAGCTTGGTTGCACTTTAAATTTTGAAATGGAAAAGGAAGGAAAAATTTCAAAAATAGGGCCTGAAAACCCATATAATACTCCAGTATTTGCAATAAAGAAAAAGGACAGTACTAAATGGAGAAAATTAGTAGATTTCAGAGAACTTAAGAGAACTCAAGACTTTTGGGAAGTTCAATTAGGA…
>AUT-110260853
AAGGAGGCTCTCTTAGATACAGGAGCAGATGAYACAGTATTAGAAGACATAAATTTGCCAGGAAAATGGAAACCAAGAATGATAGGAGGAATTGGAGGTTTTATCAAAGTAAGACAATATGATCAAATACATATAGAAATTTGTGGAAAAAAGGCTATAGGTACAGTCTTAGTRGGACCTACACCTGTCAACATAATTGGAAGAAATATGTTGACTCAGCTTGGATGCACAYTAAATTTTGAAATGGAAAAGGAAGGAAAAATTACAAAGATTGGGCCTGATAACCCATATAACACTCCAGTATTTGCCATAAAAAAGAAGGACAGTACTAAGTGGAGAAAATTAGTAGATTTCAGGGAGCTCAAAAGAACTCAAGACTTTTGGGAAGTTCAATTAGGA…
>AUT-110260854
AAGGAAGCTCTATTAGATACAGGAGCAGATGATACAGTGTTAGGGGAAATGAATTTGCCAGGAAGATGGAAACCAAAAATGATAGGGGGAATTGGAGGTTTTATCAAAGTAAGACAGTATGATCAGATAACCATAGAAATCTGTGGCCATAAAGCGACAGGTACAGTATTAATAGGACCTACACCTGTCAACATAATTGGAAGAAATCTGTTGACCCAGCTTGGTTGCACTTTAAATTTTGAAATGGAAAAGGAAGGAAAAATTTCAAAAATAGGGCCTGAAAACCCATATAATACTCCAGTATTTGCAATAAAGAAAAAGGACAGTACTAAATGGAGAAAATTAGTAGATTTCAGAGAACTTAAGAGAACTCAAGACTTTTGGGAAGTTCAATTAGGA…
>AUT-110260855
ATAGAAGCCCTATTAGATACAGGAGCAGATGATACAGTATTAGAAGAAATAAATTTACCAGGAAAATGGAGACCAAAAATGATAGGGGGAATTGGAGGTTTTATCAAAGTAAGACAGTATGATCAGATAGCTATAGAAATTTGTGGAAAAAAGGCTGTAGGTACAGTATTAGTAGGACCTACACCTGTCAACATAATTGGACGAAATATGTTGACTCAGATTGGGTGTACTTTAAATTTTGAGATGGAAAAAGAAGGAAAAATTTCAAAAATTGGGCCTGAAAATCCATACAATACTCCAGTGTTTGCCATAAAGAAAAAAGATAGCACTAAGTGGAGAAAATTAGTAGATTTCAGAGAACTCAAGAGAACTCAAGACTTCTGGGAGGTTCAATTAGGA…
>AUT-110260856
AAGGAAGCTCTATTAGATACAGGAGCAGATGATACAGTATTAGAAGACATGRATTTGCCAGGAAGATGGAAACCAARAATGATAGGGGGAATTGGAGGTTTTATCAAAGTAAAACAGTATGATCAAGTACCCATAGAAATCTGTGGGCATAAAGCTATTGGTACAGTATTAGTAGGGCCTACACCTGTCAACATAATTGGAAGAAATCTGTTGACTCAGCTTGGCTGCACTTTAAATTTTGAAATGGAAAAGGAAGGGAAAATTTCAAAAATTGGGCCTGAAAATCCATACAATACTCCAGTATTTGCTATAAAGAAAAAAGACAGTACTAAATGGAGAAAATTAGTAGACTTTAGAGAACTTAAGAGAACACAAGACTTTTGGGAAGTTCAATTAGGA…
>AUT-110260862
AAGGAAGCTCTATTAGATACAGGAGCAGATGATACAGTATTAGAAGAAATGAGTCTGCCAGGAAGATGGAAACCAAAAATGATAGGGGGAATTGGAGGTTTTATCAAAGTAAAACAGTATGATCAGGTACCAATAGAAATCTGTGGACATAAAGCTATAGGTACAGTATTAATAGGACCTACACCTGTCAACATAATTGGAAGAAATCTGTTGACTCAGATTGGATGCACTTTAAATTTTGAAATGGAAAAGGAAGGAAAAATTTCAAAGATTGGGCCTGAAAATCCATACAATACTCCAGTATTTGCCATAAGGAAAAAAGATAGTACTAAATGGAGAAAATTAGTAGATTTCAGAGAACTTAAGAGAACTCAAGACTTCTGGGAAGTTCAATTGGGA…
>AUT-110260865
AAGGAAGCTCTATTAGATACAGGAGCAGATGATACAGTATTAGAAGACATGGCGTTGCCAGGAAGATGGAAACCAAAAATGATAGGGGGAATTGGAGGTTTTATCAAAGTAAGACAATATGATCAGATACCCATAGAAATCTGTGGACATAAAGCTATAGGTACAGTATTAGTAGGGCCTACACCTGTCAACATAATTGGAAGAAATCTGTTGACTCAGATTGGTTGCACTTTAAATTTTGAAATGGAAAAGGAAGGGAAAATTTCAAAAATTGGGCCTGAAAATCCATACAATACTCCAGTATTTGCCATAAAGAAAAAAGATGGTACTAAATGGAGAAAATTAGTAGATTTCAGAGAACTTAAGAGAACTCAAGACTTCTGGGAGGTCCAATTAGGA…
>AUT-110261939
AAGGAAGCTCTATTAGATACAGGAGCAGATGATACAGTATTAGAAGARATGAATTTGTCAGGAAGATGGAAACCAAAAATGATAGGGGGAATTGGAGGTTTTATCAAAGTAAGACAGTATGATCAGATATCTGTAGAAATATGTGGACATAAAGCTATAGGTACAGTATTAGTAGGACCTACACCTGTCAACATAATTGGAAGAAATCTGTTGACTCAGATTGGTTGCACTTTAAATTTTGAAATGGAAAAGGAAGGAAAAATTTCAAAAATTGGGCCTGAAAATCCATACAATACTCCAGTATTTGCCATAAAGAAAAARGACAGTACTAAATGGAGAAAATTAGTAGATTTCAGAGAACTTAAAAGAACTCAAGACTTCTGGGAGGTTCAATTAGGA…
>AUT-110261940
ATAGAAGYCCTATTAGATACAGGAGCAGATGATACAGTATTAGAAGAAATAAATTTACCAGGAAAATGGAAACCAAAAATGATAGGGGGAATTGGAGGTTTTATCAAAGTAAGACAGTATGATCAGATACCTATAGAAATTTGTGGGAAAAGGGCCGTAGGTACGGTATTAGTAGGGCCTACACCTGTCAACATAATTGGACGAAATATATTGACTCAGATTGGWTGTACTTTAAATTTGGAAATGGAAAAGGAAGGAAAAATTTCAAAAATTGGGCCTGAAAATCCATAYAACACCCCAGTATTTGCCATAAAGAAAAAGGATAGTACTAAATGGAGAAAATTAGTAGATTTCAGAGAACTCAAAAGAACTCAAGACTTCTGGGAGGTCCAATTAGGA…
>AUT-110262494
AAGGAAGCTCTATTAGATACAGGAGCAGATGATACAGTATTAGAAGACATGAGTTTGCCAGGAAAATGGAAACCAAAAATGATAGGGGGAATTGGAGGTTTTATCAAAGTAAAACAGTATGATCAGATACCAATAGAAATCTGTGGACATAAAGTTATAGGTACAGTATTAATAGGATCTACACCTGTCAACATAATTGGGAGAAATCTGTTGACTCAACTTGGATGCACTTTAAATTTTGAAATGGAAAAGGAAGGAAAAATTTCAAAGATTGGGCCTGAAAATCCATACAATACTCCAGTATTTGCCATAAAGAAAAAAGACAGTACTAAATGGAGAAAATTAGTAGATTTCAGAGAACTTAAAAGAACTCAAGACTTCTGGGAAGTTCAATTGGGA…
>AUT-110263151
AAGGAGGCTCTCTTAGATACAGGAGCAGATGATACAGTATTAGAAGACATAAATTTGCCAGGAAAATGGAAACCAAGAATGATAGGAGGAATTGGAGGTTTTATCAAAGTAAGACAATATGATCAAATACATATAGAAATTTGTGGAAAAAAGGCTATAGGTACAGTATTAGTAGGACCTACACCTGTCAACATAATTGGAAGAAATATGTTGACTCAGCTTGGATGCACACTAAATTTTGATATGGAAAAGGAAGGAAAAATTACAAAAATTGGGCCTGATAACCCATATAACACTCCAGTATTTGCCATAAAGAAGAAGGACAGTACTAAGTGGAGAAAATTAGTAGATTTCAGGGAACTCAAAAGAACTCAAGACTTTTGGGAAGTTCAATTAGGA…
>AUT-110263153
AAGGAAGCTCTATTAGATACAGGAGCAGATGATACAGTATTAGAAGAAATGAGTTTGCCAGGAAGATGGATACCAAAAATGATAGGGGGAATTGGAGGTTTTATCAAAGTAAGACAGTATGAACAGGTACCTGTAGAAATTTGTGGACATAAAGCTATAGGTACAGTATTAGTAGGACCTACACCTGTCAACATAATTGGAAGAAATCTGTTGGCTCAGATTGGCTGTACTTTAAATCTTGAAATGGAAAAGGAAGGGAAAATTTCAAAAATTGGGCCTGAGAATCCATATAATACTCCAGTATTTGCCATAAAGAAAAARGACAGTACTAAATGGAGAAAACTAGTAGATTTCAGAGAACTTAAGAGAACTCAAGACTTCTGGGAAGTTCAATTAGGA…
>AUT-110263154
AAGGAAGCCCTATTAGATACAGGAGCAGATGATACAGTATTAGAAGACATAAATTTGCCAGGAAGATGGAAACCAAAAATGATAGGGGGAATTGGAGGYTTTATCAAAGTAAGACAGTATGATCAGATACCCATAGAGATCTGTGGACATAAAGCTATAGGTACAGTATTAGTAGGACCTACACCTGTCAACATAATTGGAAGAAACCTGTTGACTCAGATTGGCTGCACTTTAAATTTTGAAATGGAAAAAGAAGGAAAAATTTCAAAAATTGGGCCTGAAAATCCATACAATACTCCAATATTTGCCATAAAGAAAAAAGACAGTACTAAATGGAGAAAATTAGTAGACTTCAGAGAACTTAAGAGAACTCAAGACTTCTGGGAAGTTCAATTAGGA…
>AUT-110263308
AAGGAAGCTCTATTAGAYACAGGAGCAGATGATACAGTATTAGAAGAAATGAATTTGCCAGGRAGATGGAAACCAAAAATGATAGGGGGAATTGGAGGTTTTATCAAAGTAAGACAGTATGATCAAGTACCCATAGAAATCTATGGAAAGAAAGCTATAGGTACAGTGTTAATAGGACCTACACCTGTCAACATAATTGGAAGAAATCTGTTGACTCAGATTGGCTGCACTTTAAATTTTGAAATGGAAAAGGAAGGRAAAATTTCAAGAATTGGGCCTGAAAATCCATAYAATACTCCAGTATTTGCCATAAAGAAAAAAGACAGTACTAAATGGAGAAAATTAGTAGATTTCAGAGAACTTAAGAGAACTCAAGACTTYTGGGAAGTTCAATTAGGA…
>AUT-110265226
AAAGAAGCTCTATTAGACACAGGAGCAGATGATACAGTATTAGAAGACATGARTTTGCCWGGAAGATGGAARCCAAAAATGATAGGRGGAATTGGAGGTTTTATCAAAGTAAAACARTATGATCAGATACCCATAGAAATCTGTGGRCATAARGCTATAGGTACAGTRTTAATAGGACCTACACCTGTCAACATAATTGGAAGAAATCTGTTGACTCAGATTGGCTGCACTTTAAATTTTGAAATGGAAAAGGAAGGAAAAATTTCAAAAATTGGGCCWGAMAATCCMTACAATACTCCAGTATTTGCTATAAAGAAAAAAGACAGTACYAAGTGGAGAAAATTAGTAGATTTCAGAGAACTTAAGAGAACTCAAGACTTCTGGGAAGTTCAATTAGGA…
>AUT-110265640
AAAGAAGCTCTATTAGATACAGGAGCAGATGATACAGTAGTAGAAGAAATGAGTTTGCCAGGAARATGGAAACCAAAAATGATAGGGGGAATTGGAGGTTTTATCAAAGTAAGACAGTATGATCAGATACAAGTAGAAATCTGCGGACATAAAGCTATAGGTACAGTATTAGTAGGACCTACACCTGTCAACATAATTGGAAGAAACCTGTTGACTCAACTTGGATGCACTTTAAATTTTGAAATGGAAAAGGAAGGAAAAATTTCAAAAATTGGGCCTGAAAATCCATACAATACTCCAGTGTTTGCCATAAAGAAAAAAGATAGCACTAAATGGAGAAAATTAGTAGATTTCAGAGAACTTAAGAGAACTCAAGACTTCTGGGAAGTTCAACTAGGA…
>AUT-110265745
AAGGAAGCTCTATTAGATACAGGAGCAGATGATACAGTATTAGAAGAMATGARTTTGCCAGGAAAATGGAAACCAAAAATGATAGGGGGAATTGGAGGTTTTATCAAAGTAAGACAGTATGATCAGATACCCATAGAAATCTGTGGACATAAAGCTATAGGTACAGTRTTAGTAGGACCAACACCTGCCAACATAATTGGCAGAAATTTGTTGACTCAGATTGGCTGCACTTTGAATTTTGAAATGGAAAAGGAAGGGAAAATTTCAAAAATTGGGCCTGAAAATCCATACAATACTCCAGTATTTGCCATAAAGAAAAAAGACAGTACTAAATGGAGAAAATTAGTAGATTTCAGAGAACTTAAGAGAACTCAAGACTTCTGGGAAGTTCAACTAGGA…
>AUT-110265747
AAAGAAGCTCTATTAGAYACAGGAGCAGATGATACAGTATTAGAAGAAATGGATTTGCCAGGAARATGGAAACCAAAAATGATAGGGGGAATTGGAGGTTTTATCAAAGTAAGACAGTATGATCAAATAGMTGTAGAAATCTGCGGACATAAAGCTAYAGGTACAGTATTAGTAGGACCTACACCTGTCAACATAATTGGAAGAAATCTGTTGACTCAGATTGGCTGTACTTTAAATTTTGAAATGGAAAAGGAAGGAAAAATTTCAAGAGTTGGGCCTGAAAATCCATACAATACTCCAATATTTGCCATAAAGAAAAAGGACAGTACTAAATGGAGAAAATTAGTAGATTTCAGAGAACTTAAGAGAACTCAAGAYTTCTGGGAAGTTCAATTAGGA…
>AUT-110265920
AAGGAAGCTCTATTAGATACAGGAGCAGATGATACAGTATTAGAAGAAATGAATTTGCCAGGAAAATGGAGGCCAAAAATGATAGGGGGAATTGGAGGTTTTATCAAAGTAAGACAGTATGATCAAGTACACATAGAAATCTGTGGAAGTAAAGTTATAGGTACAGTATTARTAGGACCTACACCTGTCAACATAATTGGAAGRAATCTGTTGACTCAGCTTGGTTGCACTTTAAATTTTGAAATGGAAAAGGAAGGGAAAATTTCAAAAATTGGGCCTGAGAATCCATATAATACACCAGTGTTTGCTATAAAGAAAAAAGACAGTACTAAATGGAGAAAATTAGTAGATTTCAGAGAACTTAAGAGAACTCAAGACTTCTGGGAAGTTCAATTAGGA…
>AUT-110265921
AAGGAAGCTCTATTAGATACAGGAGCAGATGATACAGTATTAGAAGAAATGACTTTACCAGGAAAATGGAAACCAAAAATGATAGGGGGAATTGGAGGTTTTATCAAAGTAAGACAGTATGATCAGATACTCATAGAAATTTGTGGACATAAAGCTATAGGTACAGTATTAGTAGGACCTACACCTGTCAACATAATTGGAAGAAATCTGTTGACTCAGATTGGCTGTACTTTAAATTTTGAAATGGAAAAGGAAGGAAAAATTTCAAAAATTGGGCCTGAAAATCCATACAATACTCCAGTATTTGCWATAAAGAAAAAAGACAGTACTAAATGGAGAAAATTAGTAGATTTCAGAGAACTTAAGAGAACTCAAGACTTCTGGGAAGTYCAATTAGGA…
>AUT-110266557
AAGGAAGCTCTATTAGATACAGGAGCAGATGATACAGTATTAGAAGACATGGATTTGCCAGGAAGATGGAGRCCAAAAATGATAGGGGGAATTGGAGGTTTTATCAAAGTAAGACAGTATGATCAGGTACCCATAGAAATCTGTGGACATAAAGCTATAGGTACAGTATTAGTAGGACCTACACCTGTCAACATAATTGGAAGAAATCTGTTGACTCAGCTTGGTTGTACTTTAAATTTTGAAATGGAAAAGGAAGGGAAAATTTCAAAAATTGGGCCTGAAAATCCATACAACACTCCAGTRTTTGCCATAAAGAAAAAAGACAGTACTAAATGGAGGAAATTAGTAGATTTCAGAGAACTTAAAAGAACTCAAGAATTCTGGGAAGTTCAATTAGGA…
>AUT-110266558
AAGGAAGCTCTATTAGATACAGGAGCAGATGATACAGTATTAGAAGAAATGAGTTTGCCAGGAAAATGGAAACCAAAAATGATAGGAGGAATTGGAGGTTTTATCAAAGTAAGACAGTATGATCAGGTGTCCATGGAAATCTGTGGACATAAAGCTATAGGTACAGTATTAGTAGGACCTACACCTGTCAACATAATTGGAAGAAACCTGTTGACTCAGATTGGTTGCACTTTAAATTTTGAAATGGAAAAGGAAGGAAAAATTTCAAAAATTGGGCCTGAAAACCCATACAATACTCCAGTATTTGCCATAAAGAAAAAGGACAGTACTAAATGGAGAAAATTAGTAGATTTTAGAGAACTTAAAAGAACTCAAGATTTCTGGGAGGTTCAATTAGGA…
>AUT-110266642
AAGGAAGCTCTATTAGATACAGGAGCAGATGATACAGTGTTAGAAGAAATRAATTTGCCAGGAAGATGGAAACCAAAAATGATAGGGGGAATTGGAGGTTTTATCAAAGTAAGACAGTATGATCAGATAACCATAGAAATCTGTGGCCATAAAGCGACAGGTACAGTATTAATAGGACCTACACCTGTCAACATAATTGGAAGAAATCTGTTGACCCAGCTAGGTTGCACTTTAAATTTTGAAATGGAAAAGGAAGGAAAAATTTCAAAAATAGGGCCTGAAAACCCATATAATACTCCAGTATTTGCTATAAAGAAAAAGGACAGTACTAAATGGAGAAAATTAGTAGATTTCAGAGAACTTAAGAGAACTCAAGACTTTTGGGAAGTTCAATTAGGA…
>AUT-110266688
ATAGAAGCCCTATTAGATACAGGAGCAGATGATACAGTATTAGAAGARATAAATTTACCAGGAAAATGGAAACCAARAATGATAGGGGGAATTGGAGGTTTTATCAAAGTAAGACAATATGATCAGRTACTTGTAGAAATTTRTGGGAAAAAGGCCGTAGGTACGGTATTAGTAGGGCCTACACCTGTYAACATAATTGGACGAAATATATTGGCTCAGATTGGTTGTACTTTAAATCTTGAAATGGAAAAGGAAGGAAAAATTTCAAAAATTGGGCCTGAAAATCCATACAACACTCCAGTATTTGCCATAAAGAAAAAGGATAGTACTAARTGGAGAAAATTAGTAGATTTCAGAGAACTCAAAAGAACTCAAGACTTCTGGGAGGTYCAATTGGGA…
>AUT-110267371
AWGGAAGCTCTATTAGAYACAGGAGCAGATGATACAGTATTAGARGATATAAATTTACCAGGAAAATGGAAACCAAAAATGATAGGGGGAATTGGAGGKTTTATCAAAGTAAAACAGTATGATAACATAGCCATAGACATTTGTGGACACAAGGCTATAGGTACAGTGTTGATAGGACCTACGCCTGTCAACATAATTGGAAGAAATCTGTTGACTCAGCTTGGGTGTACATTAAATTTTGACATGGAAAAGGAAGGAAAAATTTCAAAAATTGGGCCTGAAAATCCATACAATACTCCAGTATTTGCCATAAAGAAAAARGACAGTACTAAATGGAGAAAATTAGTAGATTTCAGAGAACTTAAAAGAACTCAAGATTTTTGGGAGGTTSAATTAGGA…
>AUT-110267375
AAGGAAGCTYTATTAGATACAGGAGCAGATGATACAGTATTAGAAGAAATGAATTTGCCAGGAAAATGGAGGCCAAAAATGATAGGGGGAATTGGAGGTTTTATCAAAGTAAGACAGTATGATCAAGTACACATAGAAATCTGTGGAAGTAAAGTTATAGGTACAGTATTAATAGGACCCACACCTGTYAACATAATTGGAAGAAATCTGCTGACTCAACTTGGTTGCACTTTAAATTTTGAAATGGAAAAGGAAGGGAAAATTTCAAAAATTGGGCCTGAGAATCCATATAATACTCCAGTGTTTGCTATAAAGAAAAAAGACAGTACTAAATGGAGAAAATTAGTAGATTTCAGAGAACTTAAGAGAACTCAAGACTTCTGGGAAGTYCAATTAGGA…
>AUT-110267528
AAGGAAGCTCTATTAGATACAGGAGCAGATGATACAGTATTAGAAGAAATGAGTTTGCCAGGAAAATGGAGGCCAAAAATGATAGGGGGAATTGGAGGTTTTATCAAAGTAAGACAGTATGATCAAGTACACATAGAAATCTGTGGAAGTAAAGTTATAGGTACAGTATTAATAGGGCCTACACCTGTCAACATAATTGGAAGAAATCTGTTGACTCAGCTTGGTTGCACTTTAAATTTTGAAATGGAAAAGGAAGGGAAAATTTCAAAAATTGGGCCTGAGAATCCATATAATACTCCAGTGTTTGCTATAAAGAAAAAAGACAGTACTAAATGGAGAAAATTAGTAGATTTCAGAGAACTTAAGAAAACTCAAGACTTCTGGGAAGTTCAATTAGGA…
>AUT-110268335
AAGGAAGCTCTATTAGATACAGGAGCAGATGATACAGTATTAGAAGATATAAATTTACCAGGAAAATGGAAACCAAAAATGATAGGGGGAATTGGAGGTTTTATCAAAGTAAGGCAATATGATCAGATAGTTTTAGAAATTTGTGGAAAAAAGGCTATAGGTACAGTGCTAGTAGGACCTACACCTGTCAACATAATTGGACGAAATATGTTGACTCAGATTGGTTGTACTTTAAATTTCGAAATGGAAGAGGAAGGAAAAATTTCAAAAATTGGGCCTGAAAATCCATACAATACTCCAGTATTTGCTATAAAGAAAAAGGACAGCACTAAATGGAGAAAATTAGTAGATTTCAGAGAACTCAAAAGAACTCAGGACTTTTGGGAAGTTCAATTAGGA…
>AUT-110268336
AAGGAAGCTTTATTGGATACAGGAGCAGATGATACAGTATTAGAARAAATGAGTTTACCAGGAAGATGGAAGCCAAAAATGATAGGGGGAATTGGAGGTTTTATCAAAGTAAGACAGTATGATCAGATACCCATAGAAATCTGCGGACATAAAGCTATAGGTACAGTATTAGTAGGACCTACACCTGTCAACATAATTGGAAGAAATCTGTTGACTCAGCTAGGTTGCACTTTAAATTTTGAAATGGAAAAGGAAGGAAAAATTTCAAAAATTGGGCCTGAAAATCCATACAATACTCCAGTATTTGCAATAAAGAAAAAAGACAGTACTAAATGGAGAAAATTAGTAGATTTCAGAGAACTTAAAAGAACTCAAGACTTCTGGGAAGTTCAATTAGGA…
>AUT-110268338
AAGGAGGCTCTCTTAGATACGGGAGCAGATGATACAGTATTAGAAGACATAAATTTGCCAGGAAAATGGAAACCAAGAATGATAGGAGGAATTGGAGGTTTTATCAAAGTAAGACAATATGATCAAATACATATAGAAATTTGTGGAAAAAAGGCTATAGGTACAGTATTAGTAGGACCTACACCTGTCAACATAATTGGAAGAAATATGTTGACTCAGCTTGGATGCACACTAAATTTTGAAATGGAAAAGGAAGGAAAAATTACAAAAATTGGGCCTGATAACCCATATAACACTCCAGTATTTGCCATAAAAAAGAAGGACAGTACTAAGTGGAGAAAATTAGTAGATTTCAGGGAACTCAAAAGAACTCAAGACTTTTGGGAAGTTCAATTAGGA…
>AUT-110269448
AAGGAAGCTCTATTAGATACAGGAGCAGATGATACAGTATTAGAAGAAATGAATTTGCCAGGAAGATGGAAACCAAAAATGATAGGGGGAATTGGAGGTTTTATCAAAGTAAGACAGTATGATCAAATACCCATAGAAATCTGTGGACATAAAGCTATAGGTACAGTGTTAATAGGACCTACACCTGTCAATATAATTGGAAGAAATCTGTTAACCCAGCTTGGTTGCACTTTAAATTTTGAAATGGAAAAAGAAGGRAAGATTTCAAAAATTGGGCCTGAAAATCCATATAATACTCCAGTATTTGCYATTAAGAAAAAGGACAGCACTAAATGGAGAAAATTAGTAGATTTCAGAGAACTTAAGAGAACTCAAGACTTCTGGGAAGTCCAACTAGGA…
>AUT-110269449
AAGGAAGCTCTATTAGATACAGGAGCAGATGATACAGTATTAGAAGAAATAAATTTGCCAGGCAGATGGAAACCAAAAATGATAGGGGGAATTGGAGGATTTATCAAAGTAAGACAGTATGATCAGATAGTCATAGAAATCTGTGGACATAAAGCTATAGGTACAGTATTAGTAGGACCTACACCTGTCAACATAATTGGAAGAAATTTGTTGACTCAGCTTGGCTGTACTTTAAATTTTGAAATGGAAAAGGAAGGAAAAATTACAAAAATTGGGCCTGAAAATCCATACAATACTCCAGTATTTGCCATAAAGAARAAAGACAGTACAAAATGGAGGAAATTAGTAGATTTCAGAGAACTTAAAAGAACTCAAGACTTTTGGGAAGTTCAATTAGGA…
>AUT-110271438
AAGGAAGCTCTATTAGATACAGGAGCAGATGATACAGTATTAGAAGAAATGTGTTTGCCAGGAAAATGGAAACCAAAAATGATAGGGGGAATTGGAGGTTTTATCAAAGTAAGACAGTATGATCAAATACCTGTAGAAATTTGTGGACATAAAGCTATAGGTACAGTATTAATAGGACCTACACCTGTCAACATAATTGGAAGAAATCTGTTGACACAGCTTGGTTGCACTTTAAATTTTGAGATGGAAAAGGAGGGAAAAATTTCAAAAATAGGGCCTGAAAATCCATACAATACTCCAATATTTGCTATAAAGAAGAAGGACAGTACTAAATGGAGAAAATTAGTAGATTTCAGAGAACTTAAGAGAACTCAAGACTTCTGGGAAGTTCAATTAGGA…
>AUT-110271439
AAGGAGGCTCTCTTAGATACAGGAGCAGATGATACAGTATTAGAAGACATAAATTTGCCAGGAAAATGGAAACCAAGAATGATAGGAGGAATTGGAGGTTTTATCAAAGTAAGACAATATGATCAAATACATATAGAAATTTGTGGAAAAAAGGCTATAGGTACAGTCTTAGTAGGACCTACACCTGTCAACATAATTGGAAGAAATATGTTGACTCAGCTTGGATGCACACTAAATTTTGAAATGGAAAARGAAGGAAAAATTACAAAAATTGGGCCTGATAACCCATATAACACTCCAGTATTTGCCATAAAAAAGAAGGACAGTACTAAGTGGAGAAAATTAGTAGATTTCAGRGARCTCAAAAGAACTCAAGACTTTTGGGAAGTTCARTTAGGA…
>AUT-110273050
AAGGAAGCTCTATTAGACACAGGAGCAGATGATACAGTATTAGAAGACATAAATTTACCAGGRAAATGGAAACCAAAAATGATAGGGGGAATTGGAGGTTTTATCAAAGTAAAACAGTATGATAACATAACCATAGACATTTGTGGACACAAGGCTATAGGTACAGTGTTAATAGGACCTACGCCTGTCAACATAATTGGAAGAAATATGTTGACTCAGATTGGGTGTACATTAAATTTTGAAATGGAAAAGGAAGGAAAAATTTCAAAAATTGGGCCTGAAAATCCATACAATACTCCAGTATTTGCCATAAAGAAAAAAGACAGTACTAAATGGAGAAAATTAGTAGATTTCAGAGAACTTAAAAGAACTCAAGATTTTTGGGAGGTTCAATTAGGA…
>AUT-110273840
AAGGAGGCTCTACTAGATACAGGAGCAGATGATACAGTATTAGAAGAAATGAGTTTGCCAGGAAAATGGAAACCAAAAATGATAGGGGGAATTGGAGGTTTTATTAAAGTAAGACAGTATGATCAGATAACTGTAGAAATCTGCGGACATAAAGCTATAGGTACAGTATTAGTAGGACCTACACCTGTCAACATAATTGGAAGAAATCTGTTGACTCAGCTTGGTTGCACTTTAAATTTTGATATGGAAAAGGAAGGAAAAATTTCAAAAATTGGGCCTGAAAATCCATACAATACTCCAGTATTTGCCATAAAGAAAAAGGACAGTACTAAATGGAGAAAATTAGTAGATTTCAGGGAGCTTAAAAGAACTCAAGACTTCTGGGAAGTTCAATTAGGA…
>AUT-110273841
AAGGAAGCTTTATTAGATACAGGGGCAGATGATACAGTATTAGAAGATATGAATTTGCCAGGAAGATGGAAACCAAAAATGATAGGGGGAATTGGAGGCTTTATCAAAGTAAGACAGTATGATCAGATACCAATAGAAATTTGTGGACATAAAGCTATAGGTACAGTATTAGTAGGACCTACACCTGTCAACATAATTGGAAGAAATYTGTTGACTCAAMTTGGTTGCACTTTAAATTTTGAAATGGAAAAGGAAGGGAAAATTTCAAAAATCGGGCCTGAAAATCCATACAATACTCCAGTATTTGCYATAAAGAAAAAAGACAGTACTAAATGGAGAAAACTAGTAGATTTCAGAGAACTTAAAAGAACTCAAGACTTTTGGGAGGTTCAGCTAGGA…
>AUT-110273844
ARGGAAGCTCTATTAGATACAGGAGCAGATGATACAGTATTAGAAGAAATGARTTTGCCAGGAAGATGGAAACCAAAAATGATAGGGGGAATTGGAGGGTTTATCAAAGTAAGACAGTATGATCAGATACCCATAGAAATTTGTGGGCATAAAGCTAYAGGTACAGTGTTAATAGGACCTACACCTATYAACATAATTGGAAGAAATCTGTTGACTCAGATTGGTTGTACTTTAAATTTTGAAATGGAAAAGGAAGGAAAGATTTCAAAAATTGGGCCTGAAAATCCATACAATACTCCAGTATTTGCTATAAAGAAAAAAGACAGTACTAAGTGGAGAAAATTAGTAGATTTCAGAGAACTYAAGAGAACTCARGATTTCTGGGARGTTCAATTAGGA…
>AUT-110274159
AAGGAAGCTCTATTAGATACAGGAGCAGATGATACAGTATTAGAAGAAATGAGTCTGCCAGGAAGATGGAAACCAAAAATGATAGGGGGAATTGGAGGTTTTATCAAAGTAAAACAGTATGATCAGATACCAATAGAAATCTGTGGACATAAAGCTATAGGTACAGTRTTAATAGGACCTACACCTGTCAACATAATTGGGAGAAATCTGTTGACTCAGCTTGGGTGTACTTTAAATTTTGAAATGGAAAAGGAAGGAAAAATTTCAAAGATTGGGCCTGAAAATCCATATAATACTCCAGTATTTGCCATAAAGAAAAAAGACAGTACTAAATGGAGAAAATTAGTAGATTTCAGAGAACTTAARAGAACTCAAGACTTCTGGGAAGTTCAATTGGGT…
>AUT-110274172
AARGAAGCTCTATTAGATACAGGAGCAGATGATACAGTATTAGAAGAAATGAATTTGCCAGGCAGATGGAAACCAAAAATGATAGGGGGAATTGGAGGTTTTATCAAAGTAAGACAGTATGATCAGATACCCATAGAAATCTGTGGGCATAAAGCTATAGGTACAGTTTTAGTAGGACCTACACCTGTCAACATAATTGGAAGAAATCTGTTGACTCAGMTTGGHTGCACTTTAAATTTTGAAATGGAAAAGGAAGGAAAAATTWCAAAAATTGGGCCTGAAAATCCATACAATACTCCAGTTTTTGCCATAAAGAAAAAGGACAGTACTAAATGGAGAAAATTAGTAGATTTCAGAGAACTTAAGAGAACTCAAGACTTYTGGGAAGTTCAATTAGGA…
>AUT-110274497
AGGGAAGCTCTATTAGATACAGGGGCAGATGATACAGTATTAGAAGACATAAATTTGCCAGGAAAATGGAAACCAAAAATGATAGGGGGAATTGGAGGTTTTATCAAAGTAAAACAGTATGACCAAATAACCATAGATATTTGTGGGCATAGGGCTACAGGTACAGTGTTAATAGGACCTACACCTGTCAACATAATTGGGAGGAATATGTTGACCCAGATTGGTTGCACTTTAAATTTTGAAATGGAGAATGAAGGAAAAATTTCAAAAATTGGGCCTGAAAATCCATACAATACCCCAATATTTGCCATAAAGAAAAAGGATGGTACTAAATGGAGAAAATTGGTAGATTTTAGAGAACTTAAAAGAACTCAGGATTTTTGGGAAGTTCAATTAGGA…
>AUT-110274926
AAGGAAGCCCTGTTAGATACAGGAGCAGATGATACAGTATTAGAAGAAATGAGTTTGCCAGGAAGATGGAGACCAAAAATGATAGGGGGAATTGGAGGTTTTATCAAAGTAAAACAGTATGATCAARTACCCATAGAAATCTGTGGGCATAAAGCTATAGGTACAGTATTAGTAGGACCTACACCTGTTAACATAATTGGAAGAAATCTGTTGACTCAGATTGGTTGTACTTTAAATTTTGAAATGGAGAAGGAAGGAAAAATTTCAAAAATTGGGCCTGAAAATCCATACAATACTCCAGTATTTGCCATAAAGAAAAAAGACAGTACTAARTGGAGAAARTTAGTAGATTTCAGAGAACTTAAGAAAACTCAAGACTTCTGGGAAGTTCAATTAGGA…
>AUT-110274933
AAGGAGGCTCTCTTAGATACAGGAGCAGATGATACAGTATTAGAAGACATAAATTTGCCAGGAAAATGGAAACCAAGAATGATAGGAGGAATTGGAGGTTTTATCAAAGTAAAACAATATGATCAAATACATATAGAAATTTGTGGAAAAAAGGCTATAGGTACAGTATTAGTAGGACCTACACCTGTCAACATAATTGGAAGAAATATGTTGACTCAGCTTGGATGCACACTAAATTTTGAAATGGAAAAGGAAGGAAAAATTACAAAAATTGGGCCTGATAACCCATATAACACTCCAGTATTTGCCATAAAAAAGAAGGACAGTACTAAGTGGAGAAAATTAGTAGATTTCAGGGAACTCAAAAGAACTCAAGACTTTTGGGAAGTTCAATTAGGA…
>AUT-110274935
AAGGAAGCTCTATTAGACACAGGAGCAGATGATACAGTATTAGAAGAAATGAATTTGCCAGGAARATGGAAACCAARAATGATAGGAGGAATTGGAGGTTTTATCAAAGTAAGACAATATGATRATGTACCCCTAGAAATCTGTGAACATAAAGTTGTAGGTACAGTATTAATAGGACCTACCCCTGTCAACATAATTGGAAGRAATCTGTTGACTCAGCTTGGTTGTACTTTAAATTTTGAAATGGAAAAGGAAGGAAAAATCTCAAAAATTGGGCCTGAAAAYCCATACAATACTCCAGTATTTGCCATAAAGAAAAARGACAGTACTAAATGGAGAAAATTAGTAGATTTCAGAGAACTTAAGAGAACTCAAGACTTYTGGGAAGTTCAATTAGGG…
>AUT-110274936
ATAGAAGCCCTATTAGACACAGGAGCAGATGATACAGTATTAGAGGAAATAGATTTGCCAGGAAAATGGAAACCAAAAATGATAGGGGGAATTGGAGGTTTTATCAAAGTAAGACAGTATGATCAGATACTTATGGAAATTTGTGGAAAAAGGGCCATTGGTACAGTATTAGTAGGRCCTACACCTGTCAACATAATTGGACGAAATATGTTGACTCAGATTGGTTGTACTTTAAATTTTGAGATGGAAAAGGAAGGAAAAATTTCAAAAATTGGGCCTGAAAATCCATACAATACTCCAATATTTGCCATAAAGAAAAAGGACAGTACTAAATGGAGAAAATTAGTAGATTTCAGAGAACTCAAGAGAACTCAAGACTTCTGGGAGGTCCAATTAGGA…
>AUT-110275016
AAAGAAGCCCTGTTAGATACAGGAGCAGATGATACAGTATTAGAAGATATGAATTTGCCAGGGAAATGGARACCAAAAATGATAGGGGGAATTGGAGGTTTTATCAAAGTAAGACAGTATGATCAGATACCCATAGAGATCTGTGGRCATAAAGCTATAGGTACAGTRTTARTAGGACCTACACCTGTTAACATAATTGGAAGAAATCTGTTRACTCARCTTGGTTGTACYTTAAATTTTGAAATGGAAAAGGAAGGAAAAATTTCAAAAATTGGGCCTGAAAATCCATACAATACTCCAGTATTTGCCATAAAGAAAAAAGACAGTACTAAGTGGAGAAAATTAGTAGATTTCAGAGAACTWAAGAAAACTCAAGACTTCTGGGAAGTTCAATTAGGA…
>AUT-110276072
AAGGAAGCTCTATTAGATACAGGAGCAGATGATACAGTATTAGAAGAAATGARTTTGCCAGGAAGATGGAAACCAAAAATGATAGGGGGAATTGGAGGTTTTATCAAAGTAAAACAGTATGATCAGATACCAATAGAAATCTGTGGACATAAAGCTATAGGTACAGTATTAATAGGACCTACACCTGTCAACATAATTGGRAGAAATATGYTGACTCAGCTTGGATGCACTTTAAATTTTGAAATGGAAAAGGAAGGAAAAATTTCAAAGATTGGGCCTGAAAATCCATATAATACTCCAGTATTTGCCATAAAGAAAAAAGACAGTACTAAATGGAGAAAATTAGTAGATTTCAGAGAACTTAAGAGAACTCAAGACTTCTGGGAAGTTCAATTGGGA…
>AUT-110276074
AAGGAAGCTCTATTAGATACAGGAGCAGATGATACAGTATTAGAAGAAATGAATTTGCCAGGAAGATGGAAACCAAAAATGATAGGGGGAATTGGAGGTTTTATCAAAGTCAGACAATATGATCAGATACTCATAGAAATTTGTGGACATAAAGCTATAGGTACAGTATTAATAGGACCTACACCTGTCAACATAATTGGAAGAAATCTGTTGACCCAACTTGGTTGCACTTTAAATTTCGAAATGGAAAAGGAGGGAAAAATTTCAAAAATAGGGCCTGAAAATCCATACAATACTCCAATATTTGCTATAAAGAAGAAGGACAGTACTAAGTGGAGAAAATTAGTAGATTTCAGAGAACTTAAGAGAACYCAAGACTTCTGGGAAGTTCAATTAGGA…
>AUT-110276075
AAGGAAGCTCTATTAGATACAGGAGCAGATGATACAGTATTAGAAGAAATAAATTTGCCAGGAAGATGGAAACCGAAAATGATAGGGGGAATTGGAGGTTTTATCAAAGTAAGGCAGTATGATCAGGTAAACATAGAAATCTGTGGACATAAAGCTACAGGTACAGTATTAGTAGGACCTACACCTGTCAACATAATTGGAAGAAATCTGTTGACTCAGCTTGGTTGTACTTTAAATTTTGAAATGGAAAAGGAAGGGAAAATTTCAAAAATTGGGCCTGAAAATCCATATAATACTCCAGTATTTGCCATCAAGAAAAAAGACAGTACTAAATGGAGAAAATTAGTGGATTTCAGAGAACTTAAGAGAACTCAAGACTTCTGGGAAGTCCAATTAGGA…
>AUT-110276076
AAAGAAGCTCTATTGGATACAGGAGCAGATGATACAGTATTAGAAGAAATRAATTTGCCAGGAAGATGGAAACCAAAAATGATAGGGGGAATTGGAGGTTTTATCAAAGTWAGACAGTATGATCAAGTACCCATAGAAATCTGTGGMAATAAAGCTATAGGTACAGTATTAGTAGGACCTACACCTGTCAACATAATTGGAAGAAATCTGTTGACTCAGATTGGTTGCACTTTAAATTTTGAAATGGAAAAGGAAGGGAAAATTTCAAGAGTTGGGCCTGAAAAYCCATATAATACTCCARTATTTGCYATAAAGAAAAAAGACAGTACTAAATGGAGAAAATTAGTAGATTTCAGAGAACTTAAGAAAACTCAAGACTTCTGGGAAGTCCAATTAGGG…
>AUT-110276476
AAGGAAGCTCTATTAGATACAGGAGCAGATGAYACAGTATTAGAAGACATRARYTTGCCAGGAAGATGGAAACCAAAAATGATAGGGGGAATTGGRGGTTTTATCAAAGTAAGACAGTATGATCAGATACCCATAGARATTTGTGGACRTGAAGCTATAGGTACAGTRTTAGTAGGACCTACACCTGTCAACATAATTGGWAGAAATCTGTTGACTCARATTGGTTGCACTTTAAATTTTGAAATGGAAAAGGAAGGGAAAATTTCAAAAATTGGGCCTGAAAATCCATACAATACTCCAGTATTCGCCATAAAGAAAAAAGACAGTACTAAATGGAGAAAATTRGTAGATTTCAGAGAACTTAAGAGAACTCAAGACTTYTGGGAAGTTCAATTAGGA…
>AUT-110276479
AAGGAAGCTCTAYTAGATACAGGAGCAGATGATACAGTATTAGAAGACATGAGTTTGCCAGGAAAATGGAAACCAAAAATGATAGGGGGAATTGGAGGTTTTATCAAAGTAAGGCAATATGATCAGATACTYATAGAAATCTGCGGACATAAAGCTATAGGTACAGTATTAGTAGGACCTACACCTGTCAACATAATTGGAAGAAATCTGTTGACTCAGATTGGCTGTACTTTAAATTTTGAAATGGAAAAGGAAGGAAAAATTTCAAAAATTGGGCCTGAAAATCCATACAATACTCCAGTATTTGCCATAAAGAAAAAAGACAGTACTAAATGGAGAAAATTAGTAGATTTCAGGGAACTTAAAAGAACTCAAGACTTTTGGGAAGTTCAATTAGGA…
>AUT-110276480
ATAGAAGCCCTATTRGACACAGGAGCAGATGATACAGTATTAGAAGAAATAMATTTACCAGGAAAATGGAAACCAAAAATGATAGGGGGAATTGGAGGTTTTATCAAAGTAAGRCAGTATGATCAGATACTTATAGAAATTTGTGGAAAAAAGGCCATAGGTACAGTATTAGTAGGACCTACACCTGTTAACATAATTGGACGRAATATGTTGACTCARATTGGYTGTACTTTAAATTTTGAGATGGAAAAGGAAGGAAAAATTTCAAAAATTGGGCCTGAAAAYCCATACAATACTCCAGTATTTGCCATAAAGAAAAAAGATAGTACTAAATGGAGAAAATTAGTAGATTTCAGRGAACTCAAAAGAACTCAAGATTTCTGGGAGGTCCAATTAGGA…
>AUT-110276485
AAGGAAGCTCTATTAGATACAGGAGCAGATGATACAGTATTAGAAGAAATGAATTTGCCAGGAAAATGGAAGCCAAAAATGATAGGGGGAATTGGAGGGTTTATCAAAGTAAGACAATATGACCAAGTAMSCATAGAAATCTGTGGACATAAAGCTRTAGGTACAGTATTAATAGGACCYACMCCTGTCAACATAATTGGAAGAAATCTGTTGACTCAGCTKGGTTGYACTTTAAATTTTGAAATGGAAAAGGAAGGGAAAATTTCAAAAATTGGGCCTGAAAATCCATATAATACTCCAATATTTGCCATAAAGAAAAAAGACAGTACAAAATGGAGAAAATTAGTAGATTTCAGGGAACTTAAGAAAACTCAAGACTTCTGGGAAGTTCAATTAGGA…
>AUT-110276487
AAGGAAGCTCTATTAGATACAGGAGCAGATGATACAGTATTAGAAGAAATGAATTTGCCAGGAAAATGGAGGCCAAAAATGATAGGGGGAATTGGAGGTTTTATCAAAGTAAGACAGTATGATCAAGTACAMATAGAAATCTGTGGAAGTAAAGTTATAGGTACAGTATTAGTAGGGCCTACACCTGTCAACATAATTGGAAGAAATCTGTTGACTCAGCTTGGTTGCACTTTAAATTTTGAAATGGAAAAGGAAGGGAAAATTTCAAAAATTGGGCCTGAGAATCCATATAATACTCCAGTGTTTGCTATAAAGAAAAAAGACAGTACTAAATGGAGAAAATTAGTAGATTTCAGRGAACTTAAGAAAACTCAAGACTTCTGGGAAGTTCAATTAGGA…
>AUT-110276488
AAGGAAGCTCTATTAGATACAGGAGCAGATGATACAGTATTAGAAGAAATGAGTCTGCCAGGAAGATGGAAACCAAAAATGATAGGGGGAATTGGAGGTTTTATCAAAGTAAAACAGTATGATCAGATACCAATAGAAATCTGTGGACATAAAGCTATAGGTACAGTATTAGTAGGACCTACACCTGTCAACATAATTGGGAGAAATCTGTTGACTCAGMTTGGATGCACTTTAAATTTTGAAATGGAAAAGGAAGGAAAAATTTCAAAGATTGGGCCTGAAAATCCATACAATACTCCAGTATTTGCCATAAAGAAAAAAGACAGTACTAAATGGAGAAAATTAGTAGATTTCAGAGAACTTAAGAGAACTCAAGACTTCTGGGAAGTTCAATTGGGA…
>AUT-110276496
AAGGAAGCTCTATTAGATACAGGAGCAGATGATACAGTGTTAGAAGAAATGAATTTACCAGGGAGGTGGAAGCCAAAAATGATAGGGGGAATTGGAGGWTTTATCAAAGTAAGACAGTATGATCAGATACCCATAGAAATCTGTGGACATAAAGCTATAGGTACAGTATTAATAGGACCTACACCTGTCAACATAATTGGAAGAAATCTGTTGACTCAGCTTGGTTGCACTTTAAATTTTGAACTAGAAAAGGAAGGAAAAATTTCAAGAATTGGGCCTGAGAATCCATATAATACACCAATATTTGCCATAAAGAAAAAGGACAGTACTAAATGGAGAAAACTAGTAGATTTCAGAGAACTTAAGAGAACTCAAGACTTYTGGGAAGTTCAATTAGGA…
>AUT-110276498
AGAGAAGCTCTATTAGATACAGGAGCAGATGATACAGTATTAGAAGAYATAGATTTGCCAGGAAAATGGAAACCAAAAATGATAGGGGGAATTGGAGGTTTCATCAARGTAAAACAGTATGATCAGATACTTATAGAAATTTGTGGAAAAAAGGCTATAGGTACAGTATTAGTAGGACCTACACCTGTCAACATAATTGGAAGAAATATGTTGACCCAGATTGGTTGTACTTTAAATTTCGATATGGAAAAGGAAGGAAAAATTTCAAAAATTGGRCCTGAAAATCCATACAATACTCCAATATTTGCAATAAAGAAAAAGGATAGCACTAAATGGAGAAAATTAGTAGATTTCAGAGAGCTCAAAAGAACACAAGACTTTTGGGAAGTTCAATTAGGA…
>AUT-110276500
ACGGAAGCTTTATTAGATACAGGAGCAGATGATACAGTATTAGAAGAAATGRATTTGCCAGGAAAATGGAAACCAAAAATGATAGGGGGAATTGGAGGTTTTATCAAAGTAAGACAGTATGATCAGGTACYCATAGAAATCTGTGGACATAAAGCTATAGGTACAGTGTTAGTAGGACCTACACCTGTCAACATAATTGGAAGAAATCTGTTGACTCAGCTTGGGTGCACTTTAAATTTTGAAATGGAAAAGGAAGGAAAAATTTCAAAAATTGGGCCTGAAAATCCATACAATACTCCAGTATTTGCCATAAAGAAAAAAGATAGTACTAAATGGAGAAAATTAGTAGATTTCAGAGAACTTAAGAGAACTCAAGATTTTTGGGAAGTTCAATTAGGA…
>AUT-110276502
AAGGAAGCTCTATTAGACACAGGAGCAGATGATACAGTATTAGAAGACATAAATTTACCAGGAAAATGGAAACCAAAAATGATAGGGGGAATTGGAGGTTTTATCAAAGTAAAACAGTATGATAACATAGCCATAGACATTTGTGGACACAAGGCTATAGGTACAGTGTTGGTAGGACCTACGCCTGTCAACATAATTGGAAGAAATATGTTGACTCAGATTGGTTGTACATTAAATTTTGAAATGGAAAAGGAAGGAAAAATTGAAAAAATTGGGCCTGAAAATCCATACAATACTCCAGTATTTGCCATAAAGAAAAARGACAGYACTAAATGGAGAAAATTAGTAGATTTCAGAGAACTTAAAAGAACTCARGATTTTTGGGAGGTTCAATTAGGA…
>AUT-110276505
AAGGAAGCTCTATTAGAYACAGGAGCAGATGATACAGTATTAGAAGAYATAAATTTGCCAGGAAAATGGAAACCAAAAATGATAGGGGGAATTGGAGGKTTTATTAAAGTAAAACAGTATGATAACATACTCATAGAMATTTGTGGAYACAARGCTACAGGTACAGTGTTAGTAGGACCTACRCCTGTCAACATAATTGGAAGRAATATGTTGACTCAGATTGGRTGTACCTTAAATTTTGAAATGGAAAAAGAAGGAAAAATTTCAAGAATTGGGCCTGAAAATCCATACAATACTCCAGTATTTGCYATAAAGAAAAARGATAGTACTAAATGGAGRAAATTAGTAGATTTCAGAGAACTTAAAAGRACTCAAGATTTTTGGGAGGTTCAATTAGGA…
>AUT-110276507
AARGAAGCTCTATTAGAYACAGGAGCAGATGATACAGTATTAGAAGAAATGGATTTGCCAGGRAGATGGAAACCAAAAATGATAGGGGGAATTGGAGGTTTTATCAAAGTAAGAGAGTATGATCAGGTATCCATAGARATCTGTGGACATAAAGCTATAGGTACAGTATTAATAGGACCTACRCCTGTCAACATAATTGGAAGAAATCTGATGACTCAGATTGGTTGCACTTTAAATTTTGAAATGGAAAAGGAAGGGAAAATTTCAAAAATTGGGCCTGAAAACCCATACAATACTCCAGTATTTGCTATAAAGAAAAAAGACAGTACTAAATGGAGAAAATTRGTAGATTTYAGRGAACTTAAGAGAACTCAAGACTTCTGGGAAGTTCAATTGGGA…
>AUT-110276508
AAGGAAGCTCTATTAGATACAGGAGCAGATGATACAGTAYTAGAAGAMATGAVTTTGCCAGGAAGATGGAAACCAAAAATGATAGGGGGAATTGGAGGTTTTATCAAAGTAAGACAGTATGATCAGATACTCRTAGAAATCTGTGGACATAAAGCTATAGGTACAGTATTGGTAGGACCTACACCTGTCAACATAATTGGAAGGAATCTGTTGACTCAGATTGGGTGCACTTTAAATTTTGAAATGGAAAAGGAAGGGAAAATTTCAAAAATTGGGCCTGAAAATCCATACAATACTCCAGTATTTGCCATAAAGAAAAAAGACAGTACTAAATGGAGAAAATTAGTAGATTTCAGGGAACTTAAGAGAACTCAAGACTTCTGGGAAGTTCAATTAGGA…
>AUT-110276509
AAGGAAGCTCTATTAGATACAGGAGCAGATGAYACAGTAGTAGAAGAAATGAATTTGCCAGGAAAATGGAGGCCAAAAATGATAGGGGGAATTGGAGGTTTTATCAAAGTAAGACAGTATGATCAAGTACACATAGAAATCTGTGGAAATAAAGTTATAGGTACAGTRTTAGTAGGRCCTACACCTGTCAACATAATTGGAAGAAATCTGTTGACTCAGCTTGGTTGCACTTTGAATTTTGAAATGGAAAAGGAAGGGAAAATTTCACAAATTGGGCCTGARAATCCATATAATACTCCAGTATTTGCTATAAAGAAAAAAGACAGTACTAAATGGAGAAAATTAGTAGATTTCAGAGAACTTAAGAGAACTCAAGACTTCTGGGAAGTTCAATTAGGA…
>AUT-110276510
AAGGAGGCTCTCTTAGATACAGGAGCAGATGATACAGTATTAGAAGACATAAATTTGCCAGGAAAATGGAAACCAAGAATGATAGGAGGAATTGGAGGTTTTATCAAAGTAAGACAATATGATCAAATACATATAGAAATTTGTGGAAAAAAGGCTATAGGTACAGTATTAGTAGGACCTACACCTGTCAACATAATYGGAAGAAATATGTTGACTCAGCTTGGATGCACACTAAATTTTGATATGGAAAAGGAAGGAAAAATTACAAAAATTGGGCCTGATAACCCATATAACACTCCAGTATTTGCCATAAAGAAGAAGGACAGTACTAAGTGGAGAAAATTAGTAGATTTCAGGGAACTCAAAAGAACTCAAGACTTTTGGGAAGTTCAATTAGGA…
>AUT-110276519
AAGGAAGCTCTATTAGATACAGGAGCAGATGATACAGTATTAGAAGACATGAATTTGCCAGGAAGATGGAAACCAAAAATGATAGGGGGAATTGGAGGTTTTATCAAAGTAAGACAGTATGATCAAATACCTATAGAAATCAGTGGACATAAAGCTATAGGTACAGTATTAGTAGGACCTACACCTGTCAACATAATTGGAAGAAATCTGTTGACTCAGATTGGTTGCACTTTAAATTTTGAAATGGAAAAAGAAGGRAAAATTTCAAARATTGGGCCTGAAAATCCMTATAATACTCCAGTGTTTGCMATAAAGAAAAAAGACAGTACTAAATGGAGAAAATTAGTAGATTTCAGAGAACTTAAGARAACTCAAGACTTYTGGGAAGTSCAATTAGGR…
>AUT-110276521
AAGGAAGCTCTATTAGATACAGGAGCAGATGATACAGTATTAGAAGAMATGMVTTTGYCAGGAARATGGAAACCAAAAATGATAGGGGGAATTGGAGGDTTTATCAAAGTAAGACAGTATGATCAGATAVCCATAGAAATCTGTGGGCATAAAGYTGTAGGTACAGTTTTAGTAGGACCTACACCTGTCAACATAATTGGAAGAAATCTGTTGACTCAGCTTGGATGCACTTTAAATTTTGAAATGGAAAAGGAAGGAAAAATTTCAAAAATTGGGCCTGAAAATCCATACAATACTCCAGTATTTGCCATAAAGAAAAAAGACAGTACTAAATGGAGAAAATTAGTAGATTTCAGAGAACTTAAGAAAACTCAAGACTTCTGGGAAGTWCAATTAGGA…
>AUT-110276522
AAGGAAGCTCTATTAGATACAGGAGCAGATGATACAGTATTAGAAGAAATAAATTTACCAGGAAAATGGAAACCAAAAATGATAGGGGGAATTGGAGGTTTTATCAAAGTAAGACAGTATGATCAGGTAACTGTAGAAATTTATGGACATAAAGCTATAGGTACAGTRTTAGTAGGACCTACACCTGTCAACATAATTGGAAGAAACCTGTTGACTCAGATTGGCTGCACTTTAAATTTTGAAATGGAAAAGGAAGGAAAAATTTCAAAAATTGGGCCTGAAAATCCATACAATACTCCAATATTTGCCATAAAGAAAAAAGACAGTACTAAATGGAGAAAATTAGTAGATTTCAGRGAACTTAAGAGAACTCAAGACTTCTGGGAAGTTCAATTAGGA…
>AUT-110276526
ATGGAGGCTCTCTTAGACACAGGAGCAGATGATACAGTATTAGAAGACATAAATTTGCCAGGAAAATGGAAACCAAAAATGATAGGAGGAATTGGAGGTTTTATCAAAGTAAGACAGTATGATGAAATACAGATAGAAATTTGTGGAAAAAAGGCTATAGGTGCAGTATTAGTAGGACCTACACCTGTCAACATAATTGGAAGAAATATGTTGACTCAGCTTGGATGCACACTAAATTTTGAAATGGAGAAGGAAGGAAAAATTWCAAAAATTGGGCCTGAYAACCCATATAACACTCCAGTATTTGCCATAAAAAAGAAGGACAGTACTAAGTGGAGAAAATTAGTAGATTTCAGGGAGCTCAAAAGAACCCAAGACTTTTGGGAAGTTCAATTAGGA…
>AUT-110276527
AAGGAAGCTCTATTAGACACAGGAGCAGATGATACAGTATTAGAAGACATAAATTTACCAGGAAAATGGAAACCAAAAATGATAGGGGGAATTGGAGGTTTTATCAAAGTAAAACAGTATGATAACATAGCCATAGATATTTGTGGACACAAGGCTATAGGTACAGTGTTGATAGGACCTACGCCTGTCAACATAATTGGAAGAAAYATGTTGACTCAGCTTGGTTGTACATTAAATTTTGACATGGAAAAGGAAGGAAAAATTTCAAAAATTGGGCCTGAAAATCCATACAATACTCCAGTATTTGCCATAAAGAAAAAAGACAGTACTAAATGGAGAAAAYTAGTAGATTTCAGAGAACTTAAAAGAACYCAAGATTTTTGGGAGGTTCAATTAGGA…
>AUT-110276528
AAGGAGGCTCTCTTAGATACAGGAGCAGATGATACAGTATTAGAAGACATAAATTTGCCAGGAAAATGGAAACCAAGAATGATAGGAGGAATTGGAGGTTTTATCAAAGTAAGACAATATGATCAAATACATATAGAAATTGGTGGAAAAAAGGCTATAGGTACAGTATTAGTAGGACCTACACCTGTCAACATAATTGGAAGAAATATGTTGACTCAGCTTGGATGCACACTAAATTTTGAAATGGAAAAGGAAGGAAAAATTACAAAAATTGGGCCTGATAACCCATATAACACTCCAGTATTTGCCATAAAAAAGAAGGACAGTACTAAGTGGAGAAAATTAGTAGATTTCAGGGAACTCAAAAGAACTCAAGACTTTTGGGAAGTTCAATTAGGA…
>AUT-110276531
AAAGAAGCTCTATTAGATACAGGAGCAGATGATACAGTATTAGAAGATATAAAKTTACCAGGAAAATGGAAACCAAGAATGATAGGRGGAAYTGGAGGTTTTATCAAAGTAAGACAGTATGATCAAATACTTATAGAAATTTGTGGAAAAAAGGCTATAGGTACAGTATTAGTAGGACCTACGCCTGTCAACATAATTGGGAGAAATATGTTGACCCAAATTGGKTGTACTTTAAATTTTGAGATGGAAAAAGAAGGAAAAATTTCAAAAATTGGGCCTGAAAATCCATACAATACTCCAATATTTGCCATAAAGAAAAAAGATAGCACTAAATGGAGAAARTTAGTAGATTTCAGAGAGCTCAAAAGAACACAAGACTTTTGGGAAGTTCAATTAGGA…
>AUT-110276532
AAGGAAGCTCTATTAGATACAGGAGCAGATGATACAGTAGTAGAAGAAATGCATTTGCCAGGAAAATGGAGGCCAAAAATGATAGGGGGAATTGGAGGTTTTATCAAAGTAAGACAGTATGATCAAGTACAMATAGAAATCTGTGGAAGTAAAGTTATAGGTACAGTATTAGTAGGACCTACACCTGTCAACATAATTGGAAGAAATCTGTTGACTCAGCTTGGTTGCACTTTAAATTTTGAAATGGAAAAGGAAGGGAAAATCTCAAAAATTGGGCCTGAGAATCCATATAATACTCCAGTATTTGCTATAAAGAAAAAAGACAGTACCAAATGGAGAAAATTAGTAGATTTCAGAGAACTTAAGAGAACTCARGACTTCTGGGAAGTTCAATTAGGA…
>AUT-110276534
AAGGAAGCTCTATTAGATACAGGAGCAGATGATACAGTATTRGAAGAAATAGATTTGCCTGGAAGATGGAAACCAAAAATGATAGGGGGAATTGGAGGTTTTATCAAAGTAAGACAGTATGAGCAGATACCCATAGAAATCTGTGGACATAAAGCTATAGGTACAGTATTAGTAGGACCTACACCTGTCAACATAATTGGAAGAAATCTGTTGACTCAGATTGGTTGCACTTTAAATTTCGAAATGGAAAAGGAAGGAAAAATTTCAAAAATTGGGCCTGAAAATCCATACAATACTCCAGTATTTGCCATAAAGAAAAAAGACAGTACTAAATGGAGAAAATTAGTAGATTTCAGAGAACTTAAGAGGACTCAAGACTTCTGGGAAGTTCAACTAGGA…
>AUT-110276537
AAGGAAGCTCTATTAGACACAGGAGCAGATGATACAGTATTAGAAGAAATAARTTTGCCAGGAAGGTGGAAACCAAAAATGATAGGGGGAATTGGAGGTTTTATCAAAGTAAGACAGTATGATCAGATACCYATAGAAATCTGTGGACATAAAGCCATAGGTACAGTATTAGTAGGACCAACCCCCGTCAACATAATTGGAAGAAATCTGTTGACTCAGATTGGTTGCACTTTAAATTTTGAAATGGAAAAGGAAGGAAAAATTTCAAAAATTGGGCCTGAAAATCCATACAATACTCCAGTATTTGCTATAAAGAAAAAGGACAGTACCAAATGGAGAAAATTAGTAGATTTTAGAGAACTCAAGAGAACTCAAGACTTCTGGGAAGTTCAATTAGGA…
>AUT-110276538
AAGGAAGCTTTATTAGATACAGGAGCAGATGATACAGTATTAGAAGACATGGAGTTGCCAGGAAGATGGAAACCAAAAATGATAGGGGGAATTGGAGGTTTTATCAAAGTAAGACAGTATGATCAAATACAAGTAGAAATCTGTGGACATAAAGCTATAGGTACAGTATTAGTAGGACCTACACCTGTCAACATAATTGGAAGAAATCTGTTGACTCAGATTGGTTGCACTTTAAATTTTGAAATGGAAAAGGAAGGGAAAATTTCAAAAATTGGACCTGAAAATCCATATAATACTCCAGTATTTGCCATAAAGAAAAAAGACAGTACTAAATGGAGAAAATTAGTAGATTTCAGAGAACTTAAGAAAACTCAAGACTTCTGGGAAGTTCAATTAGGA…
>AUT-110276539
AAGGAAGCTCTATTAGACACAGGAGCAGATGATACAGTATTAGAAGACATAAATTTACCAGGAAAATGGAAACCAAAAATGATAGGGGGAATTGGAGGTTTTATCAAAGTAAAACAGTATGATAACATAACCATAGACATTTGTGGACACAAGGCTATAGGTACAGTGTTGATAGGACCTACACCTGTCAACATAATTGGAAGAAATATGTTGACTCAGATTGGGTGTACATTAAACTTTGACATGGAAAAGGAAGGAAAAATTTCAAGAATTGGGCCTGAAAATCCATACAATACTCCAGTATTTGCCATAAAGAAAAAAGACAGTACTAAATGGAGAAAATTAGTAGATTTCAGAGAACTTAAAAGAACTCAAGATTTTTGGGAGGTTCAATTAGGA…
>AUT-110276540
AAGGAAGCTCTATTAGACACAGGAGCAGATGATACAGTATTAGAAGAAATGAATTTGCCAGGAAGGTGGAAACCAAAAATGATAGGGGGAATTGGAGGTTTTATCAAAGTAAGACAGTATGATCAGATACCCATAGAAATCTGTGGACATAAAGCTATAGGTACAGTATTAGTAGGACCAACCCCTGTCAACATAATTGGAAGAAATCTGTTGACTCAGATTGGTTGCACTTTAAATTTTGAAATGGAAAAGGAAGGAAAAATTTCAAAAATTGGGCCTGAAAATCCATATAATACTCCAGTATTTGCTATAAAGAAAAAGGACAGTACCAAATGGAGAAAATTAGTAGATTTCAGAGAACTTAAGAGAACTCAAGACTTCTGGGAAGTGCAATTAGGA…
>AUT-110276541
AAGGAAGCTCTATTAGATACAGGAGCAGATGATACAGTWTTAGAAGAAATGAATTTGCCAGGAAGATGGAAACCAAAAATGATAGGGGGAATTGGAGGTTTTATCAAAGTGAGACARTATGATCAGATTCTYATAGAAATTTGTGGACATAAAGCTATAGGTACAGTGTTAGTAGGACCTACGCCTGTCAACATAATTGGAAGAAATCTGTTGACTCAGATTGGTTGYACTTTAAATTTTGAAATGGAAAAGGAAGGAAAAATTTCAAAAATTGGGCCTGAAAATCCATACAATACTCCAATATTTGCCATAAAGAAAAAGGACAGTACTAAATGGAGAAAATTAGTAGATTTCAGAGAACTTAAGAGAACTCAAGACTTCTGGGAAGTTCAATTAGGA…
>AUT-110276542
AGGGAAGCTCTATTAGATACAGGAGCTGATGATACAGTATTAGAGGACATAAATTTGCCAGGAAAGTGGAAACCAAAAATGATAGGGGGRATTGGAGGTTTTATCAAAGTAAGACAGTATGATCAAATACTCATAGAAATTTGTGGRCATAAAGCTGTAGGTACAGTATTAGTAGGACCTACACCTGTCAACATAATTGGAAGAAATCTGTTGACCCAGCTTGGKTGCACTTTAAATTTTGAAATGGAAAAAGAGGGAAAAATCTCAAAAATTGGGCCTGAAAATCCATACAATACTCCAGTATTTGCCATAAAGAAAAAAGACAGTACTAAATGGAGAAAATTAGTAGATTTTAGRGAACTTAAGAGAACTCAAGACTTCTGGGAAGTTCAATTAGGA…
>AUT-110276544
AAGGAAGCTCTATTAGACACAGGAGCAGATGATACAGTATTAGAAGACATAAATTTACYAGGAAAATGGAAACCAAAAATGATAGGGGGAATTGGAGGTTTTATCAAAGTAAAACAGTATGATAACATAGCCATAGACATTTGTGGACACAAGGCTATAGGTACAGTGTTGATAGGACCTACGCCTGTCAACATAATTGGAAGAAAYATGTTGACTCAGATTGGGTGTACATTAAATTTTGACATGGAAAAGGAAGGAAAAATTTCAAAAATTGGGCCTGAAAATCCATACAATACTCCAGTATTTGCCATAAAGAAAAAAGACAGTACTAAATGGAGAAAATTAGTAGATTTCAGAGAACTTAAAAGAACTCAAGATTTTTGGGARGTTCAATTAGGA…
>AUT-110276550
AAGGAGGCTCTCTTAGACACAGGAGCAGATGATACAGTATTAGAAGAAGTAAATTTRCCAGGGAAATGGAAACCAAAAATGATAGGAGGAATTGGAGGTTTTATCAAAGTAAGACAATATGATCAAATAMCTATAGAAATTTGTGGGAAAAAGGCTGTAGGTTCAGTRTTAGTAGGACCCACACCTGTCAACATAATTGGAAGAAATTTGTTGACTCAGATTGGATGCACACTAAATTTTGAAATGGAGAAGGAAGGAAAAATTACAAAAATTGGGCCTGAAAATCCATACAACACTCCAATATTTGCCATAAAAAAGAAGGACAGTACTAAGTGGAGAAAATTAGTAGATTTCAGGGAACTCAAAAGAACTCAAGATTTTTGGGAAGTTCAATTAGGA…
>AUT-110276551
AAGGAAGCTCTATTAGATACAGGAGCAGATGATACAGTATTAGAAGAAATGAATTTGCCAGGAARATGGAGACCAAAAATGATAGGGGGAATTGGAGGTTTTATCAAAGTAAGACAGTATGATCAAATACCCATAGAAATCTGTGGACATAAAGCTATAGGTACAGTATTAATAGGACCTACACCTGTCAACATAATTGGAAGAAATYTGTTGACTCAGCTTGGTTGCACTTTAAATTTTGAAATGGAAAAGGAAGGGAAAATTTCAAAAATTGGGCCTGAAAATCCATATAATACTCCARTATTTGCTATAAAGAAAAAAGACAGTACTAAATGGAGAAAATTAGTAGATTTCAGAGAACTTAAGAGAACTCAAGACTTCTGGGAAGTTCAATTAGGA…
>AUT-110276552
AAAGAAGCTCTATTAGATACAGGAGCAGATGATACAGTATTAGAAGATATAAATTTGCCAGGAAAATGGAAACCAAAAATGATAGGGGGAATTGGAGGTTTTATCAAAGTAAGGCAATATGATCAGATACCTATAGAAATTTGTGGAAAAAAGGCTATGGGTACAGTGTTAGTAGGACCTACACCTGTCAACATAATCGGACGAAATATGTTGACTCAGCTTGGTTGTACTTTAAATTTCGAGATGGAAGAGGAAGGGAAAATCTCAAAAATTGGGCCTGAAAATCCATACAATACTCCAGTATTTGCTATAAAGAAAAAGGACAGCACCAAATGGAGGAAATTAGTAGATTTCAGAGAGCTCAAAAGAACTCAGGMTTTTTGGGAAGTTCAATTAGGA…
>AUT-110276553
AAAGAAGCTCTATTAGATACAGGAGCAGATGATACAGTATTAGAAGAAATGAATTTGCCAGGAAGATGGAAACCAAAAATGATAGGGGGAATTGGAGGTTTTATCAAAGTAAGACAGTATGATCAGATACCCRTAGARATCTGTGGACATAAAGCYACAGGTACAGTATTAATAGGACCTACACCTGTCAACATAATTGGAAGGAATCTGTTGACTCAGATTGGTTGTACTTTAAATTTTGAAATGGAGAAGGAAGGGAAAATTTCAARAATTGGGCCTGAAAATCCATAYAATACTCCAGTATTTGCCATAAAGAAAAARGACAGTACTAAATGGAGAAAATTAGTAGATTTCAGAGAACTTAARAGAACTCAAGAYTTCTGGGAAGTTCARTTAGGA…
>AUT-110276555
AAGGAGGCTCTCTTAGATACAGGAGCAGATGATACAGTATTAGAAGACATAAATTTGCCAGGAAAATGGAAACCAAGAATGATAGGAGGAATTGGAGGTTTTATCAAAGTAAGACAATATGATCAAATACATATAGAAATTTGTGGAAAAAAGGCTATAGGTACAGTATTAGTAGGACCTACACCTGTCAACATAATTGGAAGAAATATGTTGACTCAGCTTGGATGCACACTAAATTTTGAAATGGAAAAGGAAGGAAAAATTACAAAAATTGGGCCTGATAACCCATATAACACTCCAGTATTTGCCATAAAGAAGAAGGACAGTACTAAGTGGAGAAAATTAGTAGATTTCAGGGAACTCAAAAGAACTCAAGACTTTTGGGAAGTTCAATTAGGA…
>AUT-110276556
AAGGAAGCTCTATTAGAYACAGGAGCAGATGATACAGTATTAGAAGACATAAATTTACCAGGAAAATGGAAACCAAAAATGATAGGGGGAATTGGAGGTTTTATCAAAGTAAAACAGTATGATAACATAGCCATAGACATTTGTGGACACAAGGCTRTAGGTACAGTGTTGATAGGACCTACRCCTGTCAACATAATTGGAAGRAATATGTTGACTCAGATTGGYTGTACATTAAATTTTGAAATGGAAAAGGAAGGAAAAATTTCAAAAATTGGGCCTGARAATCCATACAACACTCCAGTATTTGCCATAAAGAAAAAAGACAGTACTAAATGGAGAAAATTAGTAGATTTCAGAGAACTTAAAAGAACTCAAGATTTTTGGGAGGTTCAATTAGGA…
>AUT-110276557
AAAGAAGCTCTATTAGATACAGGAGCAGATGATACAGTATTAGAAGACATGAATTTGCCAGGAAAATGGAAACCAAAAATGATAGGGGGAATTGGAGGTTTTATCAAGGTAAGACAGTATGATCAAATACTTATAGAAATTTGTGGAAAAAAGGCTATCGGTACGGTATTAGTAGGACCTACCCCTGTCAACATAATTGGAAGAAATATGTTGACTCAGCTTGGTTGTACTTTAAATTTTGAGATGGAAAAGGAAGGAAAAATTTCAAAAATAGGGCCTGAAAATCCATACAATACTCCAGTATTTGCTATAAAGAAAAAGGACAGCACTAAGTGGAGGAAATTAGTAGATTTCAGGGAGCTCAAGAGAACTCAGGACTTTTGGGAAGTTCAATTAGGA…
>AUT-110276559
AAGGAAGCTCTATTAGATACAGGAGCAGATGATACAGTAGTAGAAGAAATGAGTTTGCCAGGAAGATGGAAACCAAAAATGATAGGGGGAATTGGAGGTTTTATCAAAGTAAGACAGTATGATCAGATACAAGTAGAAATCTGYGGACACAAAGCTATAGGTACAGTATTAGTAGGACCTACACCTGTCAACATAATTGGAAGAAACCTGTTGACTCAAATTGGATGCACTTTAAATTTTGAAATGGAAAAGGAAGGAAAAATTTCAAAAATTGGGCCTGAAAATCCATACAATACTCCAGTGTTTGCCATAAAGAAAAAAGATAGTACTAAATGGAGAAAATTAGTAGATTTCAGAGAACTTAAGAGAACTCAAGACTTCTGGGAAGTTCAATTAGGA…
>AUT-110276560
AAGGAAGCTCTATTAGATACAGGAGCAGATGATACAGTATTAGAAGAAATGAATTTGCCAGGAAGATGGAAACCAAAAATGATAGGGGGAATTGGAGGTTTTATCAAAGTAAGACAGTATGATCAYATAACCATAGAAATYTGTGGGCGTGAAGCYAYAGGTACAGTATTAGTAGGACCTACACCTGTCAACATAATTGGAAGAAATTTGTTGACTCAGMTTGGKTGCACTTTAAATTTTGAAATGGAAAAGGAAGGGAAAATTTCAAAAATTGGGCCTGAAAATCCATAYAATACTCCAGTATTTGCCATAAGGAAAAAGGACAGTACTAAATGGAGAAAATTAGTAGATTTCAGAGAACTTAAGAGAACTCAAGACTTCTGGGAAGTTCAATTAGGA…
>AUT-110276561
AAAGAAGCTTTATTAGATACAGGAGCAGATGATACAGTATTAGAAGACATGAATTTGCCAGGAAGATGGAAACCAAAAATGATAGGGGGAATTGGAGGTTTTATCAAAGTAAGACAGTATGATCAGATAGCCATAGAAATCTGTGGACATAAAGCTATAGGTACAGTATTAATAGGACCTACACCTGTCAACATAATTGGAAGAAAYCTGTTGACTCAGCTTGGTTGCACTTTAAATTTTGAAATGGAAAAGGAAGGRAAAATTTCAAAAATTGGGCCTGAGAATCCATATAATACTCCAGTATTTGCMATAAAGAAAAARGACAGTACTAAATGGAGAAAATTAGTAGATTTTAGAGAACTTAAGAGAACTCAAGAYTTCTGGGAAGTTCAATTAGGA…
>AUT-110276562
AAGGAAGCTCTATTAGACACAGGAGCAGATGATACAGTATTAGAAGAAATGAATTTGCCAGGAAGGTGGAAACCAAAAATGATAGGGGGAATTGGAGGTTTTATCAAAGTAAGACAGTATGATCAGATACCCATAGAAATCTGTGGACATAAAGCTATAGGTACAGTATTAGTAGGACCAACCCCTGTCAACATAATTGGAAGAAATCTGTTGACTCAGATTGGTTGCACTTTAAATTTTGAAATGGAAAAGGAAGGAAAAATTTCAAAAATTGGGCCTGAAAATCCATATAATACTCCAGTATTTGCTATAAAGAAAAAGGACAGTACCAAATGGAGAAAATTAGTAGATTTCAGAGAACTTAAGAGAACTCAAGACTTCTGGGAAGTGCAATTAGGA…
>AUT-110276563
AAGGAAGCTCTATTAGATACAGGAGCAGATGATACAGTATTAGAAGAAATGAATTTGCCAGGAAAATGGAAACCAAAAATGATAGGGGGAATTGGAGGTTTTATCAAAGTAAGACAGTATGATCAAATACTCATAGAAATCTGTGGAAAGAAAGCTATAGGTACAGTATTAGTAGGACCTACACCTGTCAACATAATTGGAAGAAATCTGTTGACTCAGCTTGGTTGCACCTTAAATTTTGAAATGGAAAAGGAAGGAAAAATTTCAAAAATTGGGCCTGAAAATCCATATAATACTCCAGTATTTGCCATAAAGAGAAAAGACAGTACTAAATGGAGAAAAYTAGTAGATTTCAGAGAACTTAAGAGAACTCAAGACTTCTGGGAAGTTCAATTAGGA…
>AUT-110276564
AAAGAAGCTCTATTAGATACAGGAGCAGATGATACAGTATTAGAAGATATAAATTTGCCAGGAAAATGGAAACCAAAAATGATAGGGGGAATTGGAGGTTTTATCAAAGTAAGRCAATATGATCAGATACTTATAGAAATTTGTGGAAAAAAGGCTATAGGTACAGTRTTAGTAGGACCYACACCTGTCAACATAATTGGACGWAATATGTTGACTCAGATTGGTTGTACTTTAAATTTCGAGATGGAAGAGGAAGGAAAAATTTCAAAGATTGGGCCTGAAAATCCATACAATACTCCAGTATTTGCTATAAAGAAAAAGGACAGCACTAAATGGAGGAAATTGGTAGATTTTAGAGAGCTCAAAAGAACTCAGGACTTTTGGGAAGTTCAATTAGGA…
>AUT-110276566
ARGGAAGCTCTATTGGATACAGGAGCAGATGATACAGTATTAGAAGAAATGTGTTTGCCAGGGARATGGAAACCAAAAATGATAGGGGGAATTGGAGGTTTTATCAAAGTAAGACAATATGATCAAATAGCAGTAGAAATCTGTGGACATAAAGCTATAGGTACAGTATTAATAGGACCTACACCTGTCAACATAATTGGAAGAAATCTGTTGACTCAGATTGGTTGCACTTTAAATTTTGAAATGGAAAAGGAAGGGAAGATTTCAAAAATTGGGCCTGAAAATCCATACAACACTCCAGTATTTGCAATAAAGAAGAAAGACAGTACTAAATGGAGAAAATTAGTAGATTTCAGAGAACTTAAGAGAACTCAAGACTTTTGGGAAGTTCAATTAGGA…
>AUT-110276567
AAAGAAGCTCTATTAGATACAGGAGCAGATGATACAGTATTAGAAGAAATGAGTTTGCCAGGAAAATGGAAACCAAAAATGATAGGGGGAATTGGAGGCTTTATCAAAGTAAAACAGTATGATCAAGTATGCATAGAAATCTGTGGACATAAAACCATAGGTACAGTATTAATAGGACCTACACCTGTCAACATAATTGGAAGAAATTTGTTGACTCAGCTTGGTTGCACTTTAAATTTTGAAATGGAAAAAGAAGGAAAAATTTCAAGAATTGGGCCTGAAAATCCATACAATACCCCAATATTTGCCATAAAGAAAAAAGACAGTACTAAGTGGAGAAAATTAGTAGATTTCAGAGAACTTAAGAGGACTCAAGACTTCTGGGAAGTTCAACTAGGA…
>AUT-110276571
ATAGAAGCCCTATTAGACACAGGGGCAGATGATACAGTGTTAGAAGAAATAAATTTAACAGGAAAATGGAAGCCAAAAATGATAGGGGGAATTGGAGGTTTTATCAAAGTACGACAGTATGATCAGATACTTATAGAAATTTGTGGAAAAAAGGCCATAGGCACAGTATTAGTAGGACCTACACCTGTCAACATAATTGGACGAAATATGTTGACTCAGATTGGATGTACCTTAAATTTTGAGATGGAAAAGGAAGGAAAAATTTCAAAAATTGGGCCTGAAAATCCATACAATACTCCAGTATTTGCCATAAAAAAGAAAGATAGTACTAAATGGAGAAAATTAGTAGATTTCAGAGAACTCAAGAGRACTCAAGACTTCTGGGAGGTCCAATTAGGA…
>AUT-110276572
AAAGAAGCTCTATTAGATACAGGAGCAGATGATACRGTATTAGAAGACATAAATTTGCCAGGAAAATGGAAACCAAAAATGATAGGGGGAATTGGAGGTTTTATCAARGTAAGACAGTATGATCAGATACTTATAGAAATTTGTGGKAAAAAGGCGATAGGTACAGTATTAATAGGGCCTACCCCTGTCAACATAATTGGMAGAAATATGTTGACTCAGCTTGGTTGTACTTTAAATTTTGAGATGGAAAAGGAAGGAAAAATTTCAAAAATTGGGCCTGARAATCCATACAATACTCCAGTATTTGTTATAAAGAAAAAAGATAGYACTAAGTGGAGRAAATTAGTAGATTTCAGGGAGCTYARAAGAACTCAGGACTTTTGGGAAGTTCAATTAGGA…
>AUT-110276573
AAGGAAGCTCTATTAGATACAGGAGCAGATGATACAGTATTAGAAGACATGGATTTGCCAGGAAGATGGAAACCAAAAATGATAGGGGGAATTGGAGGTTTTATTAAAGTAAAACAGTATGATCAGATACCCATAGAAATCTGTGGACATAAAACTATAGGTACAGTATTAATAGGACCTACACCTGTCAACATAATTGGAAGAAATCTGTTGACTCAGCTTGGCTGCACTTTAAATTTTGAAATGGAAAAGGAAGGAAAAATATCAAAAATTGGGCCTGAAAATCCATACAATACTCCAGTATTTGCCATAAAGAAAAAAGACAGTACTAAATGGAGAAAATTAGTAGATTTCAGAGAACTTAAAAGAACTCAAGACTTCTGGGAAGTTCAATTAGGA…
>AUT-110276574
AAGGAAGCTCTATTAGATACAGGAGCAGATGATACAGTATTAGAAGAAATGAATTTGCCRGGAAGATGGAGACCAAAAATGATAGGGGGAATTGGAGGTTTTATCAAAGTAAGACAGTATGACCAAATACTCATAGAAATTTGTGGACATAAAGCTATAGGTACAGTATTAGTAGGACCTACACCTGTCAACATAATTGGAAGAAACCTGTTGACTCAGATTGGTTGCACTTTAAATTTTGAAATGGAAAAGGAAGGGAAAATTTCAAAAATTGGGCCTGAAAATCCATATAATACTCCAGTATTTGCCATAAAGAAAAARGACAGTACTAAATGGAGAAAATTAGTAGATTTCAGAGAACTTAAGAAAACTCAAGACTTCTGGGAAGTTCAATTAGGG…
>AUT-110276575
AAGGAAGCTCTATTAGACACAGGAGCAGATGATACAGTATTAGAAGACATAGATTTACCAGGAAAATGGAAACCAAAAATGATAGGGGGRATTGGAGGTTTTATCAAAGTAAAACAGTATGATAACATAACCATAGACATTTGTGGACACAAGGCTATAGGTACAGTGTTGATAGGACCTACGCCTGTCAACATAATTGGAAGAAATATGTTGACTCAGATTGGGTGTACATTAAATTTTGAAATGGAAAAGGAAGGAAAAATTTCAAAAATTGGGCCTGAAAATCCATATAATACTCCAGTATTTGCCATAAAGAAGAAAGACAGTACTAAATGGAGAAAATTAGTAGATTTCAGAGAACTTAAAAGAACTCAAGATTTTTGGGAGGTTCAATTAGGA…
>AUT-110276576
AAGGAAGCTCTATTAGATACAGGAGCAGATGATACAGTAATAGAAGACATGCATTTGCCAGGAAAATGGAGGCCAAAAATGATAGGGGGAATTGGAGGTTTTATCAAAGTRARACAGTATGATCAAGTACCCATAGAAATCTGTGGAAGTAAAGTYATAGGYACAGTATTAGTAGGACCTACACCTGTCAACATAATTGGAAGAAATCTGTTGACTCAGCTTGGTTGCACTTTAAATTTTGAAATGGAAAAGGAAGGRAAAATCTCAARAATTGGGCCTGAGAATCCATATAATACTCCAGTATTTGCTATAAAGAAAAAAGACAGTACTAAATGGAGAAAATTAGTAGATTTCAGAGAACTTAAGAAAACTCAAGACTTCTGGGAAGTTCAATTAGGA…
>AUT-110276581
AAGGAAGCTCTATTAGACACAGGAGCAGATGATACAGTATTAGAAGACATAAATTTACCAGGAAAATGGAAACCAAAAATGATAGGGGGAATTGGAGGTTTTATCAAAGTAAAACAGTATGATAACATAGCCATAGACATTTGTGGACACAAGGCTATAGGTACAGTGTTRATAGGACCTACGCCTGTCAACATAATTGGAAGAAATATGTTGACTCAGATTGGGTGTACATTAAATTTTGACATGGAAAAGGAAGGAAAAATTTCAAAAATTGGGCCTGAAAATCCATACAATACTCCAGTATTTGCCATAAAGAAAAAAGACAGTGCTAAATGGAGAAAATTAGTAGATTTCAGAGAACTTAAAAGAACTCAAGATTTTTGGGAGGTTCAATTAGGA…
>AUT-110276582
AAGGAAGCTCTATTAGATACAGGAGCAGATGATACAGTATTAGAAGACATGCAGTTGCCAGGAAGATGGAAACCAAAAATGATAGGGGGAATTGGAGGTTTTATCAAAGTAAAACAGTATGATCAGATAACAGTAGACATCTGTGGACATAAAGCCACAGGTACAGTGTTAATAGGACCTACACCTGTCAACATAATTGGAAGAAATCTGTTGACTCAGATTGGBTGCACTTTAAATTTTGAAATGGAAAAGGAAGGGAAAATTTCAAAAATTGGGCCTGAAAATCCATACAATACTCCAGTATTTGCTATAAAGAAAAAAGACAGTACTAAATGGAGAAAATTAGTAGATTTCAGAGAACTTAAGAGAACTCAAGACTTCTGGGAAGTTCAATTAGGG…
>AUT-110276584
AAGGAAGCTCTATTAGATACAGGAGCAGATGATACAGTATTAGAAGACATGGATTTGCCAGGAAGATGGAAACCAAAAATGATAGGGGGAATTGGAGGTTTTATCAAAGTAAGACAGTATGAGSAGATACCCATAGAAATATGTGGACATAAAACTATAGGTACAGTATTAATAGGACCTACACCTGTCAACATAATTGGAAGAAATCTGTTGACTCAGCTTGGTTGTACTTTAAATTTTGAAATGGAAAAGGAAGGGAAAATTTCAAAAATTGGGCCTGAAAATCCATACAATACTCCAGTATTTGCTATAAAGAAAAAAGACAGTACTAAATGGAGAAAATTAGTAGATTTCAGAGAACTTAAGAGAACTCAAGAYTTCTGGGAAGTTCAATTAGGA…
>AUT-110276586
AAGGAAGCTCTATTAGATACAGGAGCAGATGATACAGTATTAGAAGAAATGAGTTTGCCAGGGAGATGGAAGCCAAAAATGATAGGGGGAATTGGAGGTTTTATCAAAGTGAGACAGTATGATCAGATACCCATAGAAATCTGTGGACATAAAGCTATAGGCACAGTATTAATAGGACCTACTCCCGTCAACATAATCGGAAGAAATCTGTTGACTCAGCTTGGTTGCACTTTAAATTTTGAAATGGAAAAGGAAGGAAAAATTTCAAGAATTGGGCCTGAAAATCCATACAATACTCCAGTATTTGCCATAAAGAAAAAAGACAGTACTAAATGGAGAAAATTAGTAGATTTCAGAGAACTTAAAAGAACTCAAGACTTCTGGGAAGTTCAATTAGGA…
>AUT-110276592
AAGGAAGCTCTATTAGATACAGGAGCAGATGATACAGTATTAGAAGAAATGAATTTGCCAGGAAGATGGAARCCAAAAATGATAGGGGGAATTGGAGGTTTTATCAAAGTAAGACAGTATGATCAGATTCCCATAGAAATTTGTGGACAAAAAGCTATAGGTACAGTGTTAGTAGGACCTACGCCTGTCAACATAATTGGAAGAAATCTGTTGACTCAGATTGGTTGCACTTTAAATTTYGAAATGGAAAAGGAAGGAAARATTTCAAAAATTGGGCCTGAAAATCCATACAATACTCCAATATTTGCCATAAAGAAAAAAGACAGTACTAAATGGAGAAAATTAGTAGATTTCAGAGAACTTAAGAGAACTCAAGACTTCTGGGAAGTTCAATTAGGA…
>AUT-110276593
AAGGAAGCTCTATTAGATACAGGAGCAGATGATACAGTATTAGAAGAAATGAATTTGCCAGGAAAATGGAGGCCAAAAATGATAGGGGGAATTGGAGGTTTTATCAAAGTAAGACAGTATGATCAAGTACACATAGAAATCTGTGGAAGTAAAGTTATAGGTACAGTATTAATAGGRCCCACACCTGTCAACATAATTGGAAGAAATCTGTTGACTCAGCTTGGTTGCACTTTAAATTTTGAAATGGAAAAGGAAGGGAAAATTTCAAAAATTGGGCCTGAGAATCCATAYAATACTCCAGTGTTTGCTATAAAGAAAAAAGACAGTACTAAATGGAGAAAATTAGTAGATTTCAGAGAACTTAAGAGAACTCAAGACTTCTGGGAAGTTCAATTAGGA…
>AUT-110276594
AGGGAAGCTCTATTAGATACAGGAGCAGATGATACAGTAKTAGAAGAAATGCATTTGCCAGGAAAATGGAGGCCAAAAATGATAGGGGGAATTGGAGGTTTTATCAAAGTAAGACAGTATGATCAAGTACACATAGAAATTTGTGGAAGTAAAGTTATAGGTACAGTATTAGTAGGRCCTACACCTGTCAACATAATTGGAAGAAATCTGTTGACTCAGCTTGGTTGCACTTTAAATTTTGAAATGGAAAAGGAAGGRAAAATCTCAAAAATTGGGCCTGAGAATCCATATAATACTCCAGTATTTGCTATAAAGAAAAAAGACAGTACTAAATGGAGAAAATTAGTAGATTTCAGRGAACTTAAGAAAACTCAAGACTTCTGGGAAGTTCAATTAGGA…
>AUT-110276595
AAGGAAGCTCTATTAGATACAGGAGCAGATGATACAGTATTAGAAGAAATGACTTTGCCAGGAAAATGGAGGCCAAAAATGATAGGGGGAATTGGAGGTTTTATCAAAGTAAGACAGTATGATCAAGTACACATAGAAATCTGTGGAAATAAAGTTATAGGTACAGTATTAGTAGGACCTACACCTGTCAACATAATTGGAAGAAATCTGTTGACTCAGCTTGGTTGCACTTTAAATTTTGAAATGGAAAAGGAAGGGAAAATTTCAAAAATTGGGCCTGAGAATCCATATAATACTCCAGTGTTTACTATAAAGAAAAAAGACAGTACTAAATGGAGAAAATTAGTAGATTTCAGAGAACTTAAGAGAACTCAAGACTTCTGGGAAGTTCAATTAGGA…
>AUT-110276596
AAGGAAGCTCTATTAGATACAGGAGCAGATGATACAGTATTAGAAGAAATGAATTTGCCAGGAAGGTGGAAGCCAAAAATGATAGGGGGAATTGGAGGTTTTATCAAAGTAAGACAGTATGATCAAATAACYMTAGAAATCTGTGGACATAAAGCTATAGGTACAGTRTTAATAGGACCTACACCTGTCAACATAATTGGAAGAAATCTGTTGACTCAAATTGGTTGCACTTTAAATTTTGAAATGGAAAAGGAAGGGAARATTTCAAAAATTGGGCCTGAAAATCCATATAATACACCAGTATTTGCCATAAAGAAAAAAGATAGTACTAAATGGAGAAAATTAGTAGATTTCAGAGAACTTAARAGAACTCAAGACTTCTGGGAAGTTCAATTAGGA…
>AUT-110276597
AAGGAAGCTCTATTAGATACAGGGGCAGATGATACAGTATTAGAAGAAATGAATTTRCCAGGGAGATGGAAACCAAAAATGATAGGGGGAATTGGAGGATTTATCAAAGTAAGACAATATGATCAGGTASCCWTAGAAATCTGTGGACATAAAGCTATAGGTACAGTATTAGTAGGACCTACACCTGTCAACATAATTGGAAGAAATCTGTTGACTCAACTWGGTTGCACTTTAAAYTTTGAAATGGAAAAGGAAGGGAAAATTTCAAAAATTGGGCCTGAAAATCCATACAATACTCCAGTATTTGCCATAAAGAAAAAAGACAGTAATAAATGGAGAAAATTAGTAGATTTCAGGGAACTTAAGAAAACTCAAGACTTCTGGGAAGTTCAGTTAGGA…
>AUT-110276598
AAGGAAGCTCTATTAGACACAGGAGCAGATGATACAGTATTAGAAGACATAAATTTACCAGGAAAATGGAAACCAAAAATGATAGGGGGAATTGGAGGTTTTATCAAAGTAAAACAGTATGATAACATAACCATAGACATTTGTGGACACAAGGCTATAGGTACAGTGTTGATAGGACCTACGCCTGTCAACATAATTGGAAGGAATATGTTGACTCAGCTTGGTTGTACATTAAATTTTGAAATGGAAAAGGAAGGAAAAATTTCAAAAATTGGRCCTGAAAATCCATACAATACTCCAGTATTTGCCATAAAGAAAAAAGACAGCACTAAATGGAGAAAATTAGTAGATTTCAGAGAACTTAAAAGAACTCAAGATTTTTGGGAGGTTCAATTAGGA…
>AUT-110276599
AGGGAAGCTCTATTAGATACAGGAGCAGATGATACAGTATTAGAAGACATAGATTTGCCAGGAAAATGGAAACCAAAAATGATAGGGGGAATTGGAGGTTTTATCAAAGTAAAACAGTATGAYCAAATAACCATAGATATTTGTGGACACAAAGCTACAGGTACAGTRTTAGTAGGACCTACGCCTGTCAACATAATTGGGAGAAATATGTTGACTCAGATTGGTTGCACTTTAAATTTTGATATGGAAAAAGAAGGAAAGATCTCAAAAATTGGGCCTGAAAATCCATACAATACTCCAGTATTTGCCATAAAGAAAAAAGACAGTACTAAATGGAGAAAATTAGTAGATTTTAGAGAACTCAAAAGAACTCAAGACTTTTGGGAAGTTCAGTTAGGA…
>AUT-110276603
ATAGAAGCCCTATTAGACACAGGAGCAGATGATACAGTATTAGAAGAAATAACTTTACCAGGAAAATGGAAACCAAAAATGATAGGGGGAATTGGAGGTTTTATCAAAGTAAGACAATATGATCAGATACTTATRGAAATTTGTGGAAARAGRGCCATAGGTACAGTATTAGTAGGACCTACACCTGTCAACATAATTGGACGAAATATGTTGACTCAGATTGGTTGTACTTTAAATTTTGAGATGGAAAARGAAGGAAAGATTTCAAAAATTGGRCCTGAAAATCCATACAATACTCCAATATTTGCCATAAAGAAAAAAGATAGTACCAAATGGAGAAAATTAGTAGATTTCAGAGAACTCAAGAGAACTCAAGATTTCTGGGAGGTCCAATTAGGA…
>AUT-110276604
AAGGAAGCTCTATTAGATACAGGAGCAGATGATACAGTATTAGAAGACATGAATYTGACAGGAAGATGGAAACCAAAAATGATAGGGGGAATTGGAGGTTTTATCAAAGTAAGACAGTATGATCAGATACCCATAGAAATCTGCGGACATAAAGCTATAGGTACAGTATTAGTAGGACCTACRCCTGTCAACATAATTGGAAGAAATCTGTTGACTCAGATTGGCTGCACTTTAAATTTTGAAATGGAAAAAGAAGGAAAAATTTCAAAAATTGGGCCTGAAAACCCATACAATACTCCAGTATTTGCCATAAAGAAAAAAGACAGTACTAAATGGAGAAAATTAGTAGATTTCAGAGAACTTAAGAGAACTCAAGACTTCTGGGAAGTTCAGTTAGGA…
>AUT-110276605
AAAGAAGCTCTATTAGATACAGGAGCAGATGATACAGTRTTAGAAGACATAGATTTGCCAGGAAAATGGAAACCAAAAATGATAGGGGGAATTGGRGGTTTTATCAAGGTAAGACARTATGATCAGATACYTATAGAAATTTGTGGAAAAAAGGCTATAGGTACRGTATTAGTAGGACCTACCCCTGTCAACATAATTGGAAGAAATATGTTGACTCAGCTTGGTTGTACTTTAAATTTTGAGATGGAAAAGGAAGGAAAAATTTCAAAAATTGGGCCTGAAAATCCATACAATACTCCAGTRTTTGCTATAAAGAAAAAGGACAGCACTAAGTGGAGGAAATTAGTAGATTTCAGGGAGCTCAAAAGAACTCAGGACTTTTGGGAAGTTCAATTAGGA…
>AUT-110276606
AAGGAAGCCCTGTTAGATACAGGAGCAGATGATACAGTATTAGAAGAAATAAATTTGCCAGGAAGATGGAAGCCAAAAATGATAGGGGGAATTGGAGGTTTTATCAAAGTGAGACAATATGATCAAATACCTATAGAAATTTGTGGACATAAGGCTGTAGGTACAGTATTAGTAGGACCTACACCTGYCAACATAATTGGAAGAAATCTGTTGACTCARATTGGTTGTACTTTAAATTTTGAAATGGAAAAGGAAGGAAAAATTTCAAAAATTGGGCCTGAGAATCCATAYAATACTCCAGTATTTGCCATAAAGAAAAAARAYAGTACTARATGGAGAAAATTAGTAGATTTYAGAGAACTTAAGAAAACTCAAGACTTCTGGGAAGTTCAATTAGGA…
>AUT-110276609
AAGGAAGCTCTATTAGATACAGGAGCAGATGATACAGTATTAGAAGAAATGAATTTGCCAGGAAAATGGAGACCAAAAATGATAGGGGGAATTGGAGGTTTTATCAAAGTAAAACAGTATGATCAAGTACACATAGAAATCTGTGGACATAAAGTKGTGGGTACAGTATTAGTAGGACCTACACCTGTCAACATAATTGGAAGAAATCTGTTGACTCAGCTTGGTTGCACTTTAAATTTTGAAATGGAAAAGGAAGGGAAAATTTCAAAAATTGGGCCTGAAAATCCATATAATACTCCAGTATTTGCCATAAAGAAAAAAGACAGTACTAAATGGAGAAAATTAGTAGATTTCAGAGAACTTAAAAGAACTCAAGATTTCTGGGAAGTTCAATTAGGA…
>AUT-110276610
AAGGAAGCTCTATTAGATACAGGAGCAGATGATACAGTATTAGAAGACATGAATTTGCCAGGAAGATGGAAGCCAAAAATGATAGGGGGAATTGGAGGTTTTATCAAAGTAAGACAGTATGATCAGATACCCATAGAAATTTGTGGACATAAAGCTGTAGGTACAGTACTAGTAGGACCTACACCTGTCAACATAATTGGAAGAAATCTGTTGACTCAGATTGGCTGCACTTTAAATTTTGAAATGGAAAAGGAAGGAAAAATTTCAAAAATTGGGCCTGAAAATCCATACAATACTCCAGTATTTGCCATAAAGAAAAAAGACAGTACTAAATGGAGAAAATTAGTAGATTTTAGAGAACTTAAGAGAACTCAAGACTTCTGGGAAGTTCAATTAGGA…
>AUT-110276611
AAGGAAGCCCTATTAGATACAGGAGCAGATGATACAGTATTAGAAGAAATGAGTCTGCCAGGAAGATGGAAACCAAAAATGATAGGGGGAATTGGAGGTTTTATCAAAGTAAGACAGTATGATCAGATACCCATAGAAATCTGTGGACAGAAAGCTATAGGTACAGTATTAGTAGGRCCTACACCTGTCAATATAATTGGAAGAAATCTGTTGACACAGATTGGTTGCACTTTAAATTTYGAAATGGARAAGGAAGGGAAAATTTCAAAAATTGGGCCTGAAAACCCATACAAYACTCCAATATTTGCCATAAAGAAAAAAGATGGTACTAAATGGAGAAAATTAGTAGATTTCAGAGAACTTAAGAGAACTCAAGACTTCTGGGAAGTCCAATTAGGA…
>AUT-110276788
AAGGAAGCTCTATTAGATACAGGAGCAGATGATACAGTATTAGAAGACATGAATTTGCCAGGAAGATGGAAACCAAAAATGATAGGGGGAATTGGAGGTTTTATCAAAGTAAGACARTATGATCAGGTACCACTAGAAATCTGTGGACATAAAGCCATAGGTACAGTATTAGTAGGACCTACACCTGTCAACATAATTGGAAGAAATCTGTTGACTCAGATTGGTTGCACTTTAAATTTTGAAATGGAAAAGGAAGGGAAAATTTCAAAAATTGGGCCTGAAAACCCATACAATACTCCAGTATTTGCCATAAAGAAAAAAGACAGTACTAAGTGGAGAAAATTAGTAGATTTCAGAGAACTTAAGAGAACTCAAGACTTCTGGGAAGTTCAATTAGGA…
>AUT-110276789
AAGGAAGCTTTATTAGATACAGGAGCAGATGATACAGTATTAGAAGAAATACAGTTGCCAGGGAGATGGAAACCAAAAATGATAGGGGGAATTGGAGGTTTTATCAAAGTAAGACAGTATGATCAGATAGTCATAGAAATTTGTGGACATAAAGCTATAGGTACAGTATTAGTAGGACCTACACCTGTCAACATAATTGGAAGAAACCTGTTGACTCAGATTGGCTGCACTTTAAATTTTGAAATGGAAAAGGAAGGAAAAATTTCAAAAATTGGGCCTGAAAATCCATACAATACTCCAATATTTGCCATAAGGAAAAAAGACAGTACTAAATGGAGAAAATTAGTAGATTTCAGAGAACTTAAGAGAACTCAAGACTTCTGGGAAGTTCAATTAGGA…
>AUT-110276790
AAAGAAGCTCTATTAGATACAGGAGCAGATGATACAGTATTAGAAGACATAGATTTGCCAGGAAAATGGAAACCAAAAATGATAGGGGGAATTGGAGGCTTYATCAARGTAAGACAGTATGATCAGATACTTATAGAAATTTGTGGAAAAAAGGCTATAGGTACAGTATTGGTAGGACCTACACCTGTCAACATAATTGGAAGGAACATGTTGACCCAGATTGGTTGTACTTTAAATTTCGATATGGAAAAGGAAGGAAAAATTTCAAGAATTGGGCCTGAAAATCCATACAATACTCCAATATTTGCAATAAAGAAAAAGGATAGCACTAAATGGAGAAAATTAGTAGATTTCAGAGAGCTCAAAAGAACACAAGACTTTTGGGAAGTTCAATTAGGA…
>AUT-110276793
AAGGAAGCTCTATTAGATACAGGAGCAGATGATACAGTATTAGAAGARATGAATTTGCCHGGAAGATGGAAACCAAAAATGATAGGGGGAATTGGAGGTTTTATCAAAGTAAGACAGTATGATCAGATACCTATAGAAATCTGTGGACATAAAGCCATAGGTACAGTRTTAATAGGACCTACACCTGTCAACATAATTGGGAGAAATCTGTTGACTCAGCTTGGGTGCACTTTAAATTTTGAAATGGAAAAGGAAGGRAAAATTTCAAAAATTGGGCCTGAAAATCCATATAATACTCCAGTATTTGCCATAAAGAAAAAAGACAGTACTAAATGGAGAAAATTAGTAGAYTTCAGGGAACTTAARAGAACTCAAGACTTCTGGGAAGTTCAATTAGGA…
>AUT-110276794
AAAGAAGCTCTATTAGATACAGGAGCAGATGATACAGTRTTAGAAGARATAAATTTGCCAGGAAAATGGAAACCAAAAATGATAGGGGGAATTGGAGGTTTTATCAAAGTAAGGCAATATGATCAGATACTTATAGAAATTTGTGGAAAAAAGGCTATAGGTACAGTATTAGTAGGACCTACACCTRTCAACATAATTGGAAGAAATATATTGACTCAGATTGGTTGTACTTTAAATTTCGAGATGGAAAAGGAAGGAAAAATCTCAAAAATTGGGCCTGAAAATCCATACAATACTCCAGTATTTGCTATAAAGAAAAAGGACAGTACYAAATGGAGGAAATTAGTGGATTTCAGRGAGCTMAAAAGAACTCAGGACTTTTGGGAAGTTCAATTAGGA…
>AUT-110276796
AAGGAAGCTCTATTAGATACAGGAGCAGATGATACAGTATTAGAAGAAATGAATTTGCCAGGAAGATGGAAACCAAAAATGATAGGGGGAATTGGAGGTTTTATCAAAGTAAGACAGTATGATCAGATATCCATAGAAATCTGTGGACATAAAGCTATAGGTACAGTGTTAATAGGACCTACGCCTGTCAACATAATTGGAAGAAATCTATTGACTCAGATTGGTTGCACYTTAAATTTTGAAATGGAAAAGGAAGGGAAAATTTCGAAAATTGGGCCTGAAAACCCATACAATACTCCAGTATTTGCCATAAAGAAAAAAGACAGTACTAAATGGAGAAAATTAGTAGATTTCAGAGAACTTAAGAAAACTCAAGACTTCTGGGAAGTCCAATTAGGG…
>AUT-110276798
AAGGAAGCTCTATTAGATACAGGAGCAGATGATACAGTATTAGAAGAAATAAATTTGCCAGGAAGATGGAAACCAAAAATGATAGGGGGAATTGGRGGTTTTATCAAAGTAAGACAGTATGATCAGGTATCAGTAGAAATCTGTGGACATAAAGCTATAGGTACAGTATTAGTAGGACCTACACCTGTCAACATAATTGGAAGGAATCTGTTGACTCAGCTTGGGTGCACTTTAAATTTTGAAATGGAAAAGGAAGGGAAAATCTCAAAAATTGGGCCTGAAAATCCATACAATACTCCAGTATTTGCCATAAAGAAAAAAGACAGTACTAAATGGAGAAAATTAGTAGATTTCAGAGAACTCAAGAAAACTCAAGACTTCTGGGAAGTTCAATTAGGG…
>AUT-110276799
AAGGAAGCTCTATTAGAYACAGGAGCAGATGATACAGTATTAGAAGAAATGARTTTGCCAGGCAGATGGAAACCAAAAATGATAGGGGGAATTGGAGGATTTATCAAAGTAAGACAGTATGATCAGRTAGTCATAGAAATCTGTGGACATAAAGCTATAGGTACAGTATTAGTAGGACCTACACCTGTCAACATAATTGGAAGAAATCTGTTGACTCAGCTTGGCTGTACTTTAAATTTTGAAATGGAAAAGGAAGGAAAAATTACAAAAATTGGGCCTGAAAATCCATACAATACTCCAGTATTTGCCATAAAGAAAAAAGACAGTACAAAATGGAGGAAATTAGTAGATTTCAGAGAACTTAAAAGAACTCAAGACTTTTGGGAAGTTCAATTAGGA…
>AUT-110276802
AAGGAAGCTCTATTAGATACAGGAGCAGATGATACAGTATTAGAAGAAATGAGTTTGCCAGGAAGATGGAAACCAAAAATGATAGGGGGAATTGGAGGTTTTATCAAAGTAAGACAGTATGAACAAATAACAGTAGAAATCTGTGGACATAAAGCTGTGGGTACAGTATTAATAGGACCTACACCTGTCAACATAATTGGAAGAAATCTGTTGACTCAGATTGGCTGCACTTTAAATTTCGAAATGGAAAAGGAAGGAAAAATTTCAAAAATTGGGCCTGAAAATCCATACAATACTCCAGTATTTGCCATAAAGAAAAAAGACAGTACTAGCTGGAGAAAATTAGTAGATTTCAGAGAACTTAAGAGAACTCAAGACTTCTGGGAAGTTCAATTAGGA…
>AUT-110276803
AAGGAAGCTCTATTAGACACAGGAGCAGATGATACAGTATTAGAAGACATAAATTTACCAGGAAAATGGAAACCAAAAATGATAGGGGGAATTGGAGGTTTTATCAAAGTAAAACAGTATGATAACATAACCATAGACATTTGTGGRCACAAGGCTAYAGGTACAGTGTTGATAGGACCTACGCCTGTCAACATAATTGGAAGAAATATGTTGACTCAGATTGGGTGTACATTAAATTTTGACATGGAAAAGGAAGGAAAAATTTCAAAAATTGGGCCTGAAAATCCATACAATACTCCAGTATTTGCCATAAAGAAAAARGACAGTACTAAATGGAGAAAATTAGTAGATTTCAGAGAACTTAAAAGAACTCAAGATTTTTGGGAGGTTCAATTAGGA…
>AUT-110276804
ARAGAAGCTCTATTAGATACAGGAGCAGATGATACAGTATTAGAAGATATAAATTTGCCAGGAAAATGGAAGCCAAAAATGATAGGGGGAATTGGAGGTTTTATCAAAGTAAGRCAATATGATCAGATACTTATAGAAATTTGTGGAAAAAAGGCTATAGGTACAGTATTAGTAGGGCCTACACCTGTCAACATAATTGGACGAAATATGTTGACYCAGATTGGTTGTACTTTAAATTTCGARATGGAAAAGGAAGGAAAAATCTCAAAAATTGGGCCTGAAAATCCATACAATACTCCAGTATTTGCTATAAAGAAAAAGGACAGCACYAAATGGAGGAAATTAGTRGATTTYAGAGAACTCAAAAGAACTCAGGACTTTTGGGAAGTTCAATTAGGR…
>AUT-110276806
AAAGAAGCTCTAYTAGATACAGGAGCAGATGATACAGTATTAGAAGACATAAATTTGCCAGGAAAATGGAAACCAAAAATGATAGGGGGAATTGGAGGTTTCATCAAAGTAAAACAGTATGATCAGGTAMCTATAGAAATTTGTGGAAARAAGGCYATAGGTGCAGTATTAGTAGGACCTACACCTGTCAACATAATTGGAAGAAACATGTTGACCCAGATTGGTTGTACTYTAAATTTCGAWATGGAAAAGGAAGGAAAAATTTCAAAAATTGGGCCTGAAAATCCATACAATACTCCAATATTTGCAATMAAGAAAAARGACAGCACTAAATGGAGGAAGTTAGTAGATTTCAGAGAGCTCAAAAGAACACAAGACTTTTGGGAAGTTCAATTAGGA…
>AUT-110276809
AAGGAAGCTCTATTAGATACAGGAGCAGATGATACAGTATTAGAAGACATAAATTTGCCAGGAAAATGGAARCCAAAAATGATAGGGGGAATTGGAGGTTTTATCAAAGTAAGACAGTATGATCAAGTACAMATAGAAATCTGTGGAAGTAAAGTTATAGGTACAGTATTAGTAGGGCCTACACCTGTCAACATAATTGGAAGAAATCTGTTGACTCAGCTTGGTTGCACTTTAAATTTTGAAATGGAAAAGGAAGGGAAAATTTCAARAATTGGGCCTGAGAATCCATATAATACTCCAGTGTTTGCTATAAAGAAAAAAGACAGTACTAAATGGAGAAAATTAGTAGATTTCAGAGAACTTAAGAGAACTCAAGACTTCTGGGAAGTTCAATTAGGA…
>AUT-110276810
AARGAAGCTCTATTAGATACAGGAGCAGATGATACAGTATTAGARGATATAAATTTGCCAGGAAAATGGAAACCAAAAATGATAGGGGGAATTGGAGGTTTTATCAAAGTMAGACAGTATGATCAGGTACTTGTAGAAATYTGTGGACATAAAGCTATAGGTACAGTATTAGTAGGACCTACACCTGTCAACATAATTGGAAGAAATCTGTTGACTCAACTTGGMTGTACTTTAAATTTTGAAATGGAAAAGGAAGGAAAAATTTCAAAAATTGGGCCTGAAAACCCATACAATACTCCAATATTTGCTATAAAGAAAAAAGACAGTACTAAATGGAGAAAATTAGTAGATTTCAGAGAACTTAAGAGAACTCAAGACTTCTGGGAAGTTCAATTAGGA…
>AUT-110276811
AAGGAAGCTCTATTAGATACAGGAGCAGATGATACAGTATTAGAAGACATGGAGTTGCCAGGAAGATGGAGACCAAAAATGATAGGGGGAATTGGAGGTTTTATCAAAGTAAAGCAGTATGATCAGATACCCATAGACATCTGTGGGCATAAAGCTATAGGTACAGTATTAGTAGGACCTACACCTGTCAACATAATTGGAAGAAATCTGTTGACTCAGATTGGTTGCACTTTAAATTTTGAAATGGAAAAGGAAGGAAAAATTTCAAAAATWGGGCCTGAAAATCCATACAATACTCCAGTATTTGCCATAAAGAAAAAAGACAGTACTAAATGGAGAAAATTAGTAGACTTTAGAGAACTTAAGAGAACTCAAGACTTCTGGGAAGTTCAATTAGGA…
>AUT-110276812
AAGGAAGCCCTATTAGATACAGGAGCAGATGATACAGTATTAGAAGACATGGAGTTGCCAGGAAGATGGAGACCAAAAATGATAGGGGGAATTGGAGGGTTTATCAAAGTAAGACAGTATGATCAAGTAKGCATAGAAATCTGTGGACATAAAGTTATAGGTACAGTGTTAATAGGACCTACACCTGTCAACATAATTGGAAGAAATCTGTTGACTCAGCTTGGTTGCACTYTAAATTTTGAAATGGAAAAGGAAGGAAAAATCTCAAAAATTGGGCCTGAAAATCCATATAATACTCCAGTATTTGTCATAAAGAAAAAAGACAGTACTAAATGGAGAAAACTAGTAGATTTTAGAGAACTTAAGAGAACTCAAGATTTYTGGGAAGTTCAATTAGGA…
>AUT-110276813
AAGGAAGCTCTATTAGATACAGGAGCAGATGATACAGTATTAGAAGAAATGARTTTGCCAGGAAGATGGAYACCAAAAATGATAGGGGGAATTGGAGGTTTTATCAAAGTAAGACAGTATGAACAGGTACCTGTAGAAATTTGTGGACATAAAGCTATAGGTACAGTATTAGTAGGACCTACACCTGTCAACATAATTGGAAGAAATCTGTTGACTCAGGTTGGCTGTACTTTAAATTTTGAAATGGAAAAGGAAGGRAAAATTTCAAAAATTGGGCCTGAGAATCCATAYAATACTCCAGTATTTGCCATAAAGAAAAARGACAGTACTAAATGGAGAAAAYTAGTAGATTTCAGAGAACTTAAGAGAACTCAAGACTTCTGGGAAGTTCAATTAGGA…
>AUT-110276815
AAGGAAGCTCTATTAGATACAGGAGCAGATGATACAGTATTAGAAGAAATGAATTTGTCAGGAAAATGGAAACCAAAAATGATAGGGGGAATTGGAGGTTTTATCAAAGTAAGACAGTATGATCAGATACCCATAGAAATCTGTGGACATAAAGCTATAGGTACAGTATTAGTAGGACCTACACCTGTCAACATAATTGGAAGAAATCTGTTGACTCAGATTGGGTGTACTTTAAATTTTGAAATGGAAAAGGAAGGGAAAATTTCAAGAATTGGGCCTGAAAATCCATATAATACTCCAGTATTTGCCATAAAGAAAAAAGACAGTACTAAATGGAGAAAATTAGTAGATTTCAGAGAACTTAAGAAGACTCAAGACTTCTGGGAAGTTCAATTAGGA…
>AUT-110276816
AGGGAAGCTCTATTAGACACAGGAGCAGATGATACAGTATTAGAAGACATAAATTTACCAGGAARATGGAAACCAAAAATGATAGGGGGAATTGGAGGTTTTATCAAAGTAAAACAGTATGATAACATAACCATAGACATTTGTGGACAYAAGGCYACAGGTACAGTGTTGGTAGGACCTACRCCTGTCAACATAATTGGAAGAAATATGTTGACTCAGATTGGTTGTACATTAAATTTTGAGATGGAAAAGGAAGGAAAAATTTCAAAAATTGGGCCTGAAAATCCATACAATACTCCAGTATTTGCCATAAAGAAAAAAGACAGTACTAAATGGAGAAAATTAGTAGATTTCAGAGAACTTAAAAGAACTCAAGATTTTTGGGARGTTCAATTAGGA…
>AUT-110276817
AAGGAAGCTCTRTTAGATACAGGAGCAGATGATACAGTATTAGAAGACATGAGTTTGCCAGGAAAATGGAAACCAAAAATGATAGGGGGAATTGGAGGTTTTATCAAAGTAAGACAGTATGATCAGATAYTAGTAGAAATCTGTGGMCATAAAGCTATAGGTACAGTATTAGTAGGACCTACRCCTGTCAACATAATTGGAAGAAATCTGTTGACTCAGATTGGTTGCACTTTAAATTTTGAAATGGAAAAGGAAGGAAAAATTTCCAAAATTGGGCCTGAAAATCCATACAATACTCCRGTATTTGCCATAAAGAAAAAAGACAGTACTAAATGGAGAAAATTAGTAGATTTCAGAGAACTTAAGAGAACTCAAGACTTYTGGGARGTTCAATTAGGA…
>AUT-110276818
AAGGAAGCTCTCTTAGATACAGGAGCAGATGATACAGTATTAGAAGAAATAAATTTACCAGGGAGATGGAAACCAAAAATGATAGGGGGAATTGGAGGTTTTATCAAAGTAAGGCAGTATGATCAGGTAGCCATAGACATYTGTGGACATAAAGCTGTAGGTACAGTATTAGTAGGACCTACACCTGTAAACATAATTGGAAGAAATCTATTGACTCAGATTGGCTGCACTTTAAATTTTGAAATGGAAAAGGAAGGAAAGATTTCAAGAATTGGGCCCGAGAATCCATACAATACTCCCATATTTGCCATAAAGAAAAAAGACAGTACTAAATGGAGAAAATTAGTAGATTTCAGAGAACTTAAGAGAACTCAAGATTTTTGGGAAGTTCAATTAGGA…
>AUT-110276820
AAAGAAGCTCTATTAGACACAGGAGCAGATGATACAGTACTAGAAGACATAAATTTGCCAGGAAAATGGAAGCCAAAAATGATAGGGGGAATTGGAGGTTTTATCAAAGTAAGACAGTATGATCAGATACTTATAGAAATTTGTGGAAAAAAGGCTATAGGTACAGTATTGGTAGGACCTACACCTGTCAACATAATTGGACGAAACATGTTGACTCAGATTGGCTGTACTTTAAACTTCGATATGGAAAAGGAAGGAAAAATTTCAAAAATTGGGCCTGAAAATCCATACAATACTCCAGTATTTGCTATAAAGAAAAAGGACAGCACTAAATGGAGGAAATTAGTAGATTTCAGAGAGCTCAAGAGAACTCAGGACTTCTGGGAAGTCCAATTAGGA…
>AUT-110276844
AAGGAAGCTCTRTTAGATACAGGAGCAGATGATACAGTATTAGAAGAAATGAGTTTGCCAGGAAAATGGAGGCCAAAAATGATAGGGGGAATTGGAGGTTTTATCAAAGTAAGACAGTATGATCAAGTACAAATAGAAATCTGTGGAAGTAAAGTTATAGGTACAGTATTAGTAGGGCCTACACCTGTCAACATAATTGGAAGGAATCTGTTGACCCAGCTTGGTTGCACYCTAAATTTTGAAATGGAAAARGAAGGGAAAATTTCAAAAATTGGGCCTGAGAATCCATATAATACTCCAGTGTTTGCTATAAAGAAAAAAGACAGTACTAAATGGAGAAAATTAGTAGATTTCAGAGAACTTAAGAGAACTCAAGACTTCTGGGAAGTTCAATTAGGA…
>AUT-110276845
AAGGAAGCTCTATTAGATACAGGAGCAGATGATACAGTATTAGAAGACATGAATTTGCCAGGAAGATGGAAGCCAAAAATGATAGGGGGAATTGGAGGTTTTATCAAAGTAAGACAGTATGATCAGGTRCCCATGGAAATCTGTGGGCATAAAGCTATAGGTACAGTCTTAGTAGGACCTACACCTGTCAACATAATTGGAAGRAATCTGTTGACACAAATTGGATGCACTTTAAATTTCGAAATGGAAAAGGAAGGAAAAATTTCAAAAATTGGGCCTGAAAATCCATACAATACTCCAGTATTTGCCATAAAGAAAAAAGACAGTACTAAATGGAGAAAATTAGTAGAYTTTAGAGAACTTAAGAAAACTCAAGACTTCTGGGAAGTTCAATTAGGA…
>AUT-110276847
AAGGARGCTYTATTAGATACAGGAGCAGATGATACAGTATTAGAGGATATAAATTTGCCAGGAAGATGGAAACCAAAAATGATAGGGGGAATTGGAGGTTTTATCAAAGTAAGACAGTATGATCAGATACTTGTAGAAATCTGTGGACATAAAGCTATAGGTACAGTATTAGTAGGACCTACACCTGTCAACATAATTGGAAGAAATCTGTTGACTCAACTTGGCTGTACTTTAAATTTTGAAATGGAAAAGGAAGGAAAAATTTCAAAAATTGGGCCTGAAAACCCATACAATACTCCAATATTTGCCATAAAGAAAAARGACAGTACTAAATGGAGAAAATTAGTAGATTTCAGAGAACTTAAGAGAACTCAAGACTTCTGGGAAGTTCAATTAGGG…
>AUT-110276848
AAGGAAGCTCTATTAGATACAGGAGCAGATGATACAGTRTTAGAAGAAATGAGTCTGCCAGGAAAATGGAAACCAAAAATGATAGGGGGAATTGGAGGTTTTATCAAAGTAAAACAGTATGATCAGATACCAATAGAAATCTGTGGACATAAAGCTATAGGTACAGTATTAGTAGGACCTACACCTGTCAACATAATTGGGAGAAATCTGTTGACTCAGCTTGGATGCACTTTAAATTTTGAAATGGAAAAGGAAGGAAAAATTTCAAAAATTGGGCCTGAAAATCCATACAATACTCCAGTATTTGCCATAAAGAAAAAAGACAGTACTAAATGGAGAAAATTAGTAGATTTCAGAGAACTTAAGAGAACTCAAGACTTCTGGGAAGTGCAATTGGGA…
>AUT-110276852
AAGGAAGCTCTATTAGATACAGGAGCAGATGATACAGTRTTAGAAGAAATAGATTTACCAGGAAGATGGAAACCAAAAATGATAGGGGGAATTGGAGGYTTTATCAAAGTAAGACAGTATGATAAGATARSCATAGAAATTTGTGGACATAAAGCTATAGGTACAGTRTTAGTAGGACCTACACCTGTCAACATAATTGGAAGAAATCTGTTGACTCAGCTTGGCTGTACTTTAAATTTTGAAATGGAAAAGGAAGGAAAAATCTCAAAAATTGGGCCTGAAAATCCATACAATACTCCAGTATTTGCCATAAAGAAAAAAGACAGTACTAAATGGAGAAARYTAGTAGATTTCAGAGAACTTAAGAGAACTCAAGACTTCTGGGAARTTCAATTAGGA…
>AUT-110276853
AARGAAGCTCTATTAGATACAGGAGCAGATGATACAGTRTTAGAAGAYATAAATTTGCCAGGAAAATGGAAACCAAAAATGATAGGGGGAATTGGAGGCTTTATCAAAGTAAGAYAGTATGATCAGATACTTATAGAAATTGAGGGAAAAAAGGCTATAGGTACAGTATTGGTAGGACCCACACCCGTCAACATAATTGGAAGAAACATGTTGACTCAGATTGGTTGTACTTTAAATTTTGARATGGAAGAGGAAGGAAAAATTTCAAAAATTGGGCCTGAAAATCCATACAATACTCCAGTATTTGCTATAAAGAAAAAAGATAGYACTAAATGGAGGAAATTAGTAGATTTCAGAGAGCTYAAAAGAACTCAGGACTTCTGGGAAGTTCAATTAGGA…
>AUT-110276861
AAGGAAGCTCTATTAGATACAGGAGCAGATGATACAGTATTAGAAGACATGGATTTGCCAGGAAGGTGGAAACCAAAAATGATAGGGGGAATTGGAGGTTTTATCAAAGTAAAACAATATGATCAGATAACCTTAGAAATCTGTGGACATAAAGTTACAGGTACAGTATTAGTAGGGCCTACACCTGTCAACATAATTGGAAGAAATCTGTTGACTCAGCTTGGATGCACTTTAAATTTTGAAATGGAAAAGGAAGGGAAAATTTCAAAAATTGGGCCTGAAAATCCATACAATACTCCAATATTTGCCATAAAGAAAAAAGACAGTACTAAATGGAGAAAATTAGTAGATTTCAGAGAACTTAAGAGAACTCAAGACTTCTGGGAAGTTCAATTAGGA…
>AUT-110276863
AAGGAAGCTCTATTAGATACAGGAGCAGATGATACAGTATTAGAAGAAATGAATTTGCCAGGAAGATGGAAACCAAAAATGATAGGGGGAATTGGAGGTTTTATCAAAGTAAGACAATATGATCAGATACTCATAGAAATCTGTGGACATAAAGCTATAGGTACAGTATTAATAGGACCTACACCTGTCAACATAATTGGAAGAAATCTGTTGACCCAACTTGGTTGCACTTTAAATTTCGAAATGGAAAAGGAGGGAAAAATTTCAAAAATAGGGCCTGAAAATCCATACAATACTCCAATATTTGCTATAAAGAAGAAGGACAGTACTAAATGGAGAAAATTAGTAGATTTCAGAGAACTTAAGAGAACTCAAGACTTCTGGGAAGTTCAATTAGGA…
>AUT-110276864
AARGAAGCTCTATTAGATACAGGAGCAGATGATACAGTATTAGAAGAAATGGATTTGCCAGGAAGATGGAAACCAAAAATGATAGGGGGAATTGGAGGTTTTATCAAAGTAAGACAGTATGATCAGRTACCCATAGAAATYAGTGGRCATAMAGYTACAGGTACAGTATTAATAGGACCTACACCTGTCAACATAATTGGAAGAAATCTGTTGACTCAGMTTGGTTGCACTCTAAATTTTGAAATGGAAARGGAAGGGAAAATTTCAARAATTGGACCTGAAAATCCATACAATACTCCAGTATTTGCTATAAAGAARAAAGACAGTACTAAATGGAGAAAATTAGTAGATTTCAGAGAACTTAAGARAACTCAAGACTTCTGGGAAGTTCAATTAGGA…
>AUT-110276872
AAAGAAGCTCTATTAGATACAGGAGCAGATGATACAGTATTAGAAGACATAAATTTGCCAGGAAAATGGAAACCAAAAATGATAGGGGGAATTGGAGGTTTTATCAAAGTAAGACAATATGATCAGATACCTATAGAAATTTGTGGAAAAAAGGCTATAGGTACRGTATTAATAGGGCCTACCCCTGTCAACATAATTGGAAGAAATATGTTGACTCAGCTTGGTTGTACTTTAAATTTTGAGATGGAAAAGGAAGGAAAAATTTCAAAAATTGGGCCTGAAAATCCATACAATACTCCAGTATTTGTKATAAAGAAAAAAGATAGCACTAAGTGGAGGAAATTAGTAGATTTCAGGGAGCTCAAAAGAACTCAGGACTTTTGGGAAATTCAATTAGGA…
>AUT-110276873
AAGGAAGCTCTATTAGATACAGGGGCAGATGATACAGTATTAGAAGACATGRRKTTGHCAGGAAGATGGAAGCCAAAAATGATAGGGGGAATTGGAGGTTTTATCAAAGTAAGACAGTATGATCAGGTACCCTTAGAAATCTGTGGACATAAAGTTATAGGTACAGTATTAATAGGACCTACACCTGTCAACATAATTGGAAGAAATCTGTTGACTCAGCTTGGCTGTACTTTAAATTTTGAAATGGAAAAGGAAGGAAAAATTTCAAAAATTGGGCCTGAAAACCCGTACAATACTCCAGTATTTGCCATCAAGAAAAAAGACAGTACTAAATGGAGAAAATTGGTAGATTTCAGAGAACTTAAGAGAACTCAAGACTTTTGGGAAGTTCAATTAGGA…
>AUT-110276877
AAGGAAGCTCTATTAGATACAGGAGCAGATGATACAGTATTAGAAGAAATGAATTTGCCAGGAAAATGGAAACCAAAAATGATAGGGGGAATTGGAGGTTTTATCAAAGTAAGACAGTATGATCAGGTATCCATAGAAATTTGTGGACATAAARCTATAGGTACAGTATTARTAGGACCTACACCTGTCAACATAATTGGAAGAAATCTGTTGACTCAGCTTGGTTGCACTTTAAATTTTGAAATGGARAAGGAAGGAAAAATTTCAAAAATTGGGCCTGAAAACCCATACAATACTCCAGTATTTGCCATAAAGAAAAAAGACAGTACTAAATGGAGAAAATTAGTAGATTTCAGAGAACTTAAGAAAACTCAAGACTTCTGGGAAGTTCAATTAGGA…
>AUT-110276878
AGGGAAGCTCTATTAGATACAGGAGCAGATGATACAGTATTAGAAGAAATAAATTTGCCAGGAAGATGGAAACCAAAAATGATAGGAGGAATTGGAGGTTTTATCAAAGTAAGACAGTATGATCAAGTACCCATAGAAATYTATGGACATAAAGCTATAGGTACAGTGTTAGTAGGACCTACACCTGTCAACATAATTGGAAGAAATTTGTTGACTCAGATTGGTTGCACTCTAAATTTTGAAATGGAAAAGGAAGGGAAAATTTCAAAAATTGGGCCTGAAAATCCATATAATACTCCAGTATTTGCCATAAAGAAAAARGACAGTACTAAATGGAGAAAATTAGTAGATTTCAGAGAACTTAAGARAACTCAAGACTTCTGGGAAGTTCAATTAGGA…
>AUT-400102938
AAGGAAGCTCTATTAGATACAGGAGCAGATGAYACAGTATTAGAAGAAATGAATTTGCCAGGAAAATGGAAACCAAAAATGATAGGGGGAATTGGAGGTTTTATCAAAGTAAGACAGTATGAGCAGATACCCATAGAAATCTGTGGACATAAAGCDGTAGGTACAGTGTTAATAGGACCTACACCTGTCAACATAATTGGAAGAAATCTGTTGACTCAGCTTGGTTGCACTTTAAATTTTGAAWTGGAAAAGGAAGGAAAAATYTCAAAAATTGGGCCTGAAAATCCATAYAATACTCCARTATTTGCYATAAAGAAAAARRACAGTACTAAATGGAGAAAATTAATAGATTTYAGAGAACTTAARAGAACTCAAGACTTCTGGGAAGTTCAATTAGGA…
>AUT-400104147
AAGGAAGCTCTATTAGATACAGGAGCAGATAATACAGTATTAGAMGAAATRAATTTACCAGGAAGGTGGAAACCAAAAATRATAGGGGGAATTGGAGGTTTTATTAAAGTAAGACAGTATGATGAAATACTTGTAGAAATCTGTGGACATAAAGCTATAGGTACAGTATTAGTAGGACCTACACCTGTCAACATAATTGGAAGARATCTGTTGACTCAGATTGGTTGCACTTTAAATTTTGAAATGGAAAAGGAAGGRAAGATTTCAAAAATTGGGCCTGAAAATCCATATAATACTCCAGTATTTGCCATAAAGAAAAAAGACAGTACTAAATGGAGAAAATTAGTAGATTTCAGAGAACTTAAGAGAACTCAAGATTTCTGGGAAGTTCAATTAGGA…
>AUT-400104178
AHRGAAGCTCTATTAGATACAGGAGCAGATRATACAGTATTAGAAGACATRGATTTGCCAGGAAGATGGAAACCAAMAATRATAGGGGGAATTGGAGGTTTTATCAAAGTAAGACAGTATGAGCAGATACCCATAGAAATCTGTGGGCATAAARYTATAGGTACAGTATTAGTAGGACCTACACCTGTCAACATAATTGGAAGAARTCTGTTGACTCAAATYGGTTGCACTTTAAATTTTGAAYTGGAAAAGGAAGGGAAAATTTCAAAAATTGGGCCTGAAAATCCATACAATACTCCAGTATTTGCCATAAAGAAAAAGGACAGTACTAAATGGAGAAAATTAGTAGATTTYAGAGAGCTTAAGAGAACTCAAGACTTCTGGGAAGTTCARTTAGGA…
>AUT-400104383
AAGGAAGCTCTATTAGATACAGGAGCAGATGATACAGTGTTAGAAGAAATGACTTTGCCAGGAAGATGGAAACCAAAAATGATAGGGGGAATTGGAGGTTTTATCAAAGTAAGACAGTATGATCAAATATGCGTAGAAATCTGTGGGCATAAAGCTATAGGTACAGTATTAATAGGACCTACACCTGTCAACATAATTGGAAGAAATCTRATGACTCAGATTGGTTGCACTTTAAATTTTGAAATGGAAAAGGAAGGGAAAATTTCAAAAATTGGGCCTGAAAATCCATATAATACTCCAGTATTTGCCATAAAGAAAAAAGACAGTACTAAATGGAGAAAATTAGTAGATTTCAGRGAACTTAAGAGAACTCAAGACTTCTGGGAAGTTCAATTGGGA…
>AUT-400106254
AAGGAAGCTCTATTAGATACAGGAGCAGATGATACAGTAGTAGAAGAAATAAATTTGCCAGGAAAATGGAAACCAAAAATGATAGGGGGAATTGGAGGCTTTATCAAAGTAAGACAGTATGATCAAATACTTGTAGAAATTTGTGGACATAAAGCTATAGGTACAGTATTAGTAGGACCTACACCTGTCAACATAATTGGAAGAAATTTGTTGACTCAGATTGGTTGCACTTTAAATTTTGAACTGGAAAAGGAAGGAAAAATTTCAAGAATTGGGCCTGAAAATCCATATAATACTCCAATATTTGCCATAAAGAAAAAAGACAGTACTAAGTGGAGAAAGTTAGTAGATTTCAGAGAACTTAAGAGAACTCAAGACTTATGGGAAGTTCAACTAGGA…
>AUT-400106255
AAAGAAGCTCTATTAGATACAGGAGCAGATGATACAGTATTAGAAGATATAAATTTGCCAGGAAAATGGAAACCAAAAATGATAGGGGGAATTGGAGGTTTTATCAAGGTAAAGCAATATGATCAGATAGCTATAGAAATTTGTGGAAAAAGGGCTATCGGTACAGTATTAGTAGGACCTACACCTGTCAACATAATTGGACGAAGTATGTTGACTCAGATTGGTTGTACTTTAAATTTCGAAATGGAAGAGGAAGGAAAAATCTCAAAAATTGGRCCTGAAAATCCATACAATACTCCAGTATTTGCTATAAAGAAAAAGGACGGCTCCAAATGGAGGAAATTAGTAGATTTCAGAGAGCTCAAAAGAACTCAGGAYTTTTGGGAAGTTCAATTAGGA…
>AUT-400106690
AAGGAAGCTCTATTAGATACAGGAGCAGATGATACAGTATTAGAAGACATGAATTTGACAGGAAGATGGAAACCAAAAATGATAGGGGGAATTGGAGGTTTTATCAAAGTAAGACAGTATGATCAGGTACCCATAGAAATCTGTGGACAAAAGGTTATAGGTACAGTGTTAGTAGGACCTACACCTGTCAACATAATTGGAAGAAATCTGTTGACTCAGCTTGGTTGCACTTTAAATTTTGAACTGGAAAAGGAAGGAAAAATTTCAAAAATTGGGCCTGAAAATCCATACAATACTCCAGTATTTGCCATAAAGAAAAAAGACAGTACTAAATGGAGAAAATTAGTAGATTTCAGAGAACTTAAGAGAACTCAAGACTTCTGGGAAGTTCAATTAGGA…
>AUT-400107394
AAGGAAGCTCTATTAGATACAGGAGCAGATGATACAGTATTAGAAGACATGAGTTTRCCAGGAAGATGGAAACCAAAAATGATAGGGGGAATTGGAGGTTTTATCAAAGTAAGACAGTATGATCAAATAGCTATAGAAATTTGTGGCCATAAAGCTATAGGTACAGTATTAGTAGGACCTACACCTGTCAACATAATTGGAAGAAATCTGTTGACTCAGATTGGTTGCACTTTAAAYTTTGAAATGGAAAAGGAAGGRAAAATTTCAARAATTGGGCCTGAAAATCCATAYAATACTCCAGTATTTGCYATAAAGAAAAAAGAYAGTACTAAATGGAGAAAATTAGTAGATTTCAGAGAACTTAAGAGAACTCAAGACTTYTGGGAAGTTCAATTAGGA…
>AUT-400109193
ATAGAAGCTCTATTAGACACAGGAGCAGATGATACAGTATTTGAAGAAATAACTTTATCAGGAAAATGGAAACCAAAAATGATAGGGGGAATTGGAGGTYTTRTCAAAGTAAGACAGTATGATCAGATACTTATAGAATTTTGTGGGAAAAAGGTCATAGGTACAGTATTAGTAGGACCTACACCTRTCAACRTAATTGGACGAAATATRTTGACTCAGATTGGTTGTACTTTAAATTTTGACATGGAAAAGGAAGGAAAAATTTCAAGAATTGGGCCTGAAAATCCATACAATACTCCAATATTTGCCATAAAGAAAAAGGATAGTACTAAATGGAGAAAATTAGTAGATTTCAGAGAACTCAAGAGAACTCAAGACTTCTGGGAGGTCCAATTAGGA…
>AUT-400109234
AAGGAAGCTCTATTAGATACAGGAGCAGATGATACAGTATTAGAAGACATGRATTTACCAGGAAGATGGAAACCAAAAATGATAGGGGGAATTGGAGGTTTTATCAAAGTAAGACAGTATGATCAAATACTCATAGAAATCTGTGGACATAAAGCTATAGGGACAGTATTAGTAGGACCTACACCTGTCAACATAATTGGAAGAAATCTGTTGACTCAGATTGGTTGCACTTTAAATTTTGAAATGGAAAAGGAAGGGAAAATTTCAARAATTGGGCCTGAAAATCCATATAATACTCCAGTATTTGCCATAAAGAAAAAGGACAGTACTAAATGGAGAAAATTAGTAGATTTCAGAGAACTTAAGAGAACTCAAGACTTCTGGGAAGTTCAATTAGGG…
>AUT-400114564
AAGGAAGCTCTATTAGATACAGGAGCAGATGATACAGTATTAGAAGAAATGAATTTACCAGGAAGATGGAAACCAAAAATGATAGGGGGAATTGGAGGTTTTMTCAAAGTAAGACAGTATGATCAGGTATCCATAGAAATCTGTGGACATAAAGCTATAGGTRCAGTATTAGTAGGACCTACACCTGTCAACATAATTGGAAGAAATTTGTTGACTCRGCTTGGTTGCACTTTAAATTTTGAAATGGAAAAGGAAGGAAAGATTTCAAAAATTGGGCCTGAAAATCCATACAATACTCCAGTATTTGCCATAAAGAAAAAAGACGGTAMTAAATGGAGAAAATTAGTAGATTTCAGAGAACTTAAGAGAACTCAAGACTTCTGGGAAGTTCAATTAGGA…
>AUT-400114742
AAGGAAGCTCTATTAGATACAGGAGCAGATGATACAGTATTAGAAGACATGAATTTGCCAGGAAGATGGAAACCAAAAATGATAGGGGGAATTGGAGGTTTTATCAAAGTAARACAGTATGATCAGATACCCATAGAAATCTGTGGACATAAAACTATAGGTACAGTATTAATAGGACCTACACCTGTCAACATAATTGGAAGAAAYCTGTTGACTCAGCTTGGTTGCACTTTAAATTTTGAAATGGAAAAGGAAGGGAAAATTTCAAAAATTGGGCCTGAAAATCCATACAATACTCCAGTATTTGCCATAAAGAAAAAAGACAGTACTAAATGGAGAAAATTAGTRGATTTCAGRGAACTTAAGAARACTCAAGACTTCTGGGAAGTTCAATTAGGA…
>AUT-400125814
AAGGAAGCTCTATTAGATACAGGAGCAGATGATACAGTATTAGAAGAAATGAATTTGCCAGGAAGATGGAAGCCAAAAATGATAGGGGGAATTGGAGGTTTTATCAAAGTAAGACAGTATGATCAGATACTCATAGAAATCTGTGGACATAAAGCTATAGGTACAGTGTTAGTAGGACCTACACCTGTCAATATAATTGGAAGAAATCTATTGACTCAGATTGGTTGCACTTTAAATTTTGAAATGGAAAAGGAAGGGAAAATTTCAAAAATTGGGCCTGAAAATCCATACAATACTCCAGTATTTGCCATAAAGAAAAAAGACAGTACTAAATGGAGAAAATTAGTAGATTTCAGAGAACTTAAGAAAACTCAAGACTTTTGGGAAGTTCAGTTAGGA…
>AUT-400125885
AAGGAAGCTCTATTAGATACAGGAGCAGATGATACAGTATTAGAAGAMATGARTTTGCCAGGAAGATGGAAACCAAAAATGATAGGGGGAATTGGAGGTTTTATCAAAGTAAGACAGTATGATCAGRTACCMATRGAAATCTGTGGRCATAAAGCTATAGGTACAGTCTTAGTAGGACCTACACCTGTCAACATAATTGGAAGRAATCTGTTGACWCARATTGGATGCACTTTAAATTTYGAAATGGAAAAGGAAGGAAAAATTTCAAARATTGGGCCTGAAAATCCATACAATACTCCAGTATTTGCCATAAAGAAAAAAGACAGTACTAAATGGAGAAAATTAGTAGATTTYAGAGAACTTAAGARAACTCAAGACTTCTGGGAAGTTCAATTRGGA…
>AUT-400126241
AAGGAGGCTCTCTTAGACACAGGAGCAGATGATACAGTATTAGAAGACATAAATTTGCCAGGAAAATGGAAACCAAAAATGATAGGAGGAATTGGAGGTTTTATTAAAGTAAGACAATATGATCAAATACTTATAGAAATTTGTGGGAAAAAAGCTATAGGTACAGTACTAGTAGGGCCTACACCTGTCAACATAATTGGAAGAAACATGTTAACTCAGATTGGATGCACACTAAATTTTGAAATGGAAARGGAAGGAAAACTTTCAAAAATTGGGCCTGAAAATCCATATAACACGCCAGTATTTGCCATAAAAAAGAAGGACAGCACTAAGTGGAGAAAATTAGTAGATTTCAGGGAGCTCAAAAGAACTCAAGATTTTTGGGAAGTCCAATTAGGG…
>AUT-400126412
AAGGAAGCTCTATTAGATACAGGAGCAGATGATACAGTATTAGAAGAAATGAGTTTGCCAGGAAAATGGAAACCAAAAATGATAGGGGGAATTGGAGGTTTTATCAAAGTAAGACAGTATGATCAGATACCCGTAGAAATCTGTGGRCATAAAGCTATAGGTACAGTGTTAGTAGGACCTACGCCTGTCAACATAATTGGAAGAAATCTGTTGACTCAGATTGGTTGCACTTTAAATTTTGAAATGGARAAGGAAGGRAAAATTTCAAAAATTGGGCCTGAAAATCCATACAATACTCCAGTATTTGCCATAAAGAAAAAAGACAGTACTAAATGGAGAAAATTAGTAGATTTCAGAGAACTTAAGAGAACTCAAGACTTCTGGGAAGTTCAATTAGGA…
>AUT-400126650
AAGGAAGCTCTATTAGATACAGGAGCAGATGATACAGTATTAGAAGAAATRAATTTGCCAGGAAGATGGAAACCAAAAATGATAGGGGGAATTGGAGGTTTTATCAAAGTAAGACAGTATGATCAAATACCCATAGAAATCTGTGGGCATAAAGCTATAGGTACAGTATTAGTAGGACCTACACCTGTCAACATAATTGGAAGAAATCTGTTGACTCARATTGGTTGCACTTTAAATTTTGAAATGGAAAAGGAAGGGAAAATTTCAAARATTGGGCCTGAAAATCCATATAATACTCCAGTRTTTGCCATAAAGAAAAAAGACAGTACTAAATGGAGAAAATTAGTAGATTTCAGAGAACTTAAGAAAACTCAAGACTTCTGGGAAGTTCAAYTAGGA…
>AUT-400126762
AAGGAAGCTCTATTAGATACAGGAGCAGATGATACAGTATTAGAAGACATGARTTTGCCAGGAAAATGGAGGCCAAAAATGATAGGGGGAATTGGAGGTTTTATCAAAGTAAGACAGTATGATCAAGTACACATAGAAATCTGTGGAAATAAAGTTATAGGTACAGTATTAGTAGGACCTACACCTGTCAACATAATTGGAAGAAATCTGTTGACTCAGCTTGGTTGCACTTTAAATTTTGAAATGGAAAAGGAAGGGAAAATTTCAAAAATTGGGCCTGAGAATCCATATAATACTCCAGTGTTTGCTATAAAGAAAAAAGACAGCACTAAATGGAGAAAATTAGTAGATTTCAGAGAACTTAAGAAAACTCAAGACTTCTGGGAAGTTCAATTAGGA…
>AUT-400126915
AAAGAAGCTCTATTAGATACAGGAGCAGATGATACAGTATTAGAAGACATAAATTTGCCAGGAAAATGGAAACCAAAAATGATAGGGGGAATTGGAGGTTTTATCAAAGTAAGACAGTATGATCARATACTTATAGAAATTTGTGGAAAAARGGCTATAGGTACAGTATTGGTAGGACCCACACCCGTCAACATAATTGGAAGAAACATGTTGACTCAGATTGGTTGTACTTTAAATTTTGARATGGAAGAGGAAGGAAAAATTTCAAAAATTGGGCCTGAAAATCCATACAATACTCCAGTATTTGCTATAAAGAAAAAAGATAGTACTAAATGGAGGAAATTAGTAGATTTCAGAGAGCTCAAAAGAACTCAGGACTTCTGGGAAGTTCAATTAGGA…
>AUT-400127003
AAGGAAGCTCTATTAGATACAGGAGCAGATGATACAGTATTAGAAGACATAGATTTGCCAGGAAGATGGAAGCCAAAAATGATAGGGGGAATTGGAGGTTTTATCAAAGTAARACAGTATGATVACATAACCATAGATATTTGTGGACACAAGGCTAYAGGTACAGTGTTAGTAGGACCTACKCCTGTCAACATAATTGGAAGAAAYHTGTTGACTCAGATTGGTTGCACTTTAAATTTTGATATGGAAAAAGAAGGAAAAATTTCWAAAATTGGGCCTGAAAATCCATATAATACTCCAGTRTTTGCCATAAAGAAAAAAGAYAGCACTAAATGGAGAAAATTAGTAGATTTTAGAGAACTTAAAAGAACTCAGGATTTTTGGGAAGTTCAATTAGGA…
>AUT-400127004
ATGGARGCTCTATTAGATACAGGAGCAGATGATACAGTATTAGAAGACATAAATTTGCCAGGRAGATGGAARCCAAAAATGATAGGGGGAATTGGAGGTTTYATCAAAGTAAAACAGTATGATMACATAACCATAGATATTTGTGGACACAAGGCTACAGGTACAGTGTTAGTAGGACCTACDCCTGTCAACATAATTGGAAGAAATATGTTGACTCAGATTGGTTGCACTTTAAATTTTGATATGGAGAAAGAAGGAAAAATTTCAAARATTGGGCCTGAAAATCCATATAATACTCCAGTATTTGCCATAAAGAAAAAAGACAGYACTAAATGGAGAAAATTAGTAGATTTTAGRGAACTYAAAAGAACTCARGATTTTTGGGARGTTCAATTAGGA…
>AUT-400127005
AAGGAAGCTCTATTAGATACAGGAGCAGATGATACAGTATTAGAAGAAATGAATTTRCCAGGAAGATGGAAACCAAAAATGATAGGGGGAATTGGAGGTTTTATCAAAGTAAGACAGTATGATCAAATACCCATAGAAATCTGTGGAACTAAAGCTRTAGGTACAGTATTAGTAGGACCCACACCTGTCAACATAATTGGAAGAAATCTGTTGACTCAGATTGGTTGCACTTTAAATTTTGAAATGGAAAAGGAAGGGAAAATTTCAAAAATTGGGCCTGAAAATCCATATAATACTCCAGTATTTGCCATAAAGAAAAARGACAGTACTAAATGGAGAAAATTAGTAGATTTCAGAGAACTCAAGAGAACTCAAGACTTCTGGGAAGTYCAATTAGGA…
>AUT-400127033
AAGGAAGCTCTATTAGATACAGGAGCAGATGATACAGTATTAGAAGACATGAGTTTGCCAGGAAAATGGAAACCAAAAATGATAGGGGGAATTGGAGGTTTTATCAAAGTAAGACAGTATGATCAGATACCCATAGAAATCTGTGGACAGAAAGCTATAGGCACAGTATTAGTAGGACCTACACCTGTCAACATAATTGGAAGAAAYCTGTTGACTCAGATTGGTTGCACTTTAAATTTTGAAATGGAAAAGGAAGGGAAAATTTCAAAAATTGGGCCTGAAAATCCATATAATACTCCAGTATTTGCCATAAAGAAAAAAGACAGTACTAAATGGAGAAAATTAGTAGACTTCAGAGAACTTAAGAGAACTCAAGACTTCTGGGAGGTTCAATTAGGC…
>AUT-400127145
AGGGAAGCTCTATTAGATACAGGAGCRGATGATACAGTATTAGAAGACATAAATTTGCCAGGAAAATGGAAACCAAAAATGATAGGGGGAATTGGAGGKTTTATCAAAGTAAAACAGTATGATCAAATAACCATAGATATTTGTGGACACAAGGCTRYAGGTACAGTGTTAGTAGGACCCACGCCTGTCAACATAATTGGAAGAAAYATGTTGACTCAGATTGGYTGCACTTTAAATTTTGATATGGAAAAAGAAGGAAAAATTTCAAAAATTGGGCCTGAAAATCCATACAATACTCCAGTATTTGCCATAAAGAAAAAAGACAGTACTAAATGGAGAAAATTAGTAGATTTTAGAGAACTTAAGAGAACTCAGGATTTTTGGGAAGTTCAATTAGGA…
>AUT-400127160
AAGGAAGCYCTATTAGATACAGGAGCAGATGATACAGTATTAGAAGAAATGAATTTGCCAGGAAGATGGAAACCAAAAATGATAGGGGGAATTGGAGGTTTTATCAAAGTAAGACAGTATGATCAAATACWAGTAGAAATCTGTGGACAYAAAGCTATAGGTACAGTATTAGTAGGACCTACACCTGTCAACATAATTGGAAGAAATCTGTTGACTCAGATTGGTTGCACTYTAAATTTTGAAATGGAAAAGGAAGGAAAAATTTCAAAAATTGGGCCTGAAAATCCATATAATACTCCAGTATTTGCCATAAAGAAAAAAGACAGTACTAAATGGAGAAAATTAGTAGATTTCAGAGAACTTAAGAGAACTCAAGACTTCTGGGAAGTTCAATTAGGA…
>AUT-400127263
AAAGAAGCTCTATTAGATACAGGAGCAGATGATACAGTATTAGAAGAAATGAATTTGCCAGGAAGATGGAAACCAAAAATGATAGGGGGAATTGGAGGTTTTATCAAAGTAAGACAGTATGATCAGGTACCCATAGAAATCTGTGGGCATAAAGCTATAGGTACAGTATTAGTAGGRCCTACACCTGTCAACATAATTGGAAGAAATCTGTTGACTCAGATTGGTTGTACTTTAAATTTTGAAATGGAAAAGGAAGGAAAAATTTCAAAAATTGGGCCTGAAAACCCATACAATACTCCAGTGTTTGCCATAAAGAAAAAAGACAGTACTAAATGGAGAAAATTGGTAGATTTCAGAGAACTTAAGAGAACTCAAGATTTCTGGGAAGTTCAATTAGGA…
>AUT-400127310
AAAGAAGCTYTATTAGATACAGGAGCAGATGATACAGTATTAGAAGATATAAATTTGCCAGGAAAATGGAAACCAAAAATGATAGGGGGAATTGGAGGTTTTATCAAGGTAAGGCAATATGATCAGATACTTATAGAAATTTGTGGAAAAARGGCTATAGGTACAGTGTTAGTAGGACCTACACCTGTCAACATAATTGGACGAAATATGTTGACCCAGATTGGYTGTACTTTAAATTTCGARATGGAGGAGGAAGGAAAAATCTCAAAAATTGGGCCTGAAAATCCATACAATACTCCAGTATTTGCTATAAAGAAAAAGRACAGCACCAGATGGAGAAAATTAGTAGATTTCAGAGAGCTCAAAAGAACTCAGGACTTTTGGGAAGTTCAATTAGGA…
>AUT-400127318
AAGGAAGCTCTATTAGATACAGGAGCAGATGATACAGTATTAGAAGAAATGAATTTGCCAGGAAGATGGAAACCAAAAATGATAGGGGGAATTGGAGGTTTTATYAAAGTAAGACAGTATGATCARATACCTGTAGAAATCTGTGGAAATAAAGCTGTAGGCACAGTATTAATAGGACCTACACCTGTCAACATAATTGGAAGAAATCTGTTGACTCAGATTGGTTGCACTTTAAATTTTGAAATGGAAAAGGAAGGGAAAATTTCAAAAATTGGGCCTGAAAATCCATATAATACTCCAGTRTTTGCYATAAAGAAAAAAGACAGTACTAAATGGAGAAAATTAGTAGATTTCAGAGAACTTAAGAGAACWCAAGAYTTCTGGGAAGTACAATTAGGA…
>AUT-400127494
AAGGAAGCTCTATTAGATACAGGAGCAGATGATACAGTATTAGAAGAAATGRATTTGCCAGGCAGATGGAAACCAAAAATGATAGGGGGAATTGGAGGTTTTATCAAAGTAAGACAGTATGATCAGATACCYGTAGAAATTTGTGGACATAAAGCTGTAGGTACAGTATTAATAGGACCTACACCTGTCAACATAATTGGRAGAAATCTGTTGACTCAGATTGGCTGCACTYTAAATTTTGAAATGGAAAAGGAAGGAAAAATTTCAAAAATTGGGCCTGAAAAYCCATACAATACTCCARTATTTGCCATAARGAAAAAAGACAGTACTAAATGGAGAAAATTAGTAGATTTCAGGGAACTTAAGAGAACTCAAGACTTCTGGGARGTTCAATTAGGA…
>AUT-400127562
ATAGAAGCCCTATTRGATACAGGAGCAGATGATACAGTATTAGAAGAAATAAATCTACCAGGAAAGTGGAAACCAAAAATGATAGGGGGAATTGGAGGTTTTATCAAAGTAAGACAGTATGATCAGATACCYATAGAAATTTGTGGAAAAARGGCCATAGGTACAGTRYTAGTAGGACCTACACCTGTCAACATAATTGGACGAAATATGTTGACTCAGATTGGCTGYACTTTAAATTTTGAGATGGAAAAGGAAGGGAAAATTTCAAAAATTGGGCCTGAAAATCCATACAATACTCCAGTATTTGCCATAAAGAAAAAAGATAGTACTRRRTGGAKAAAATTAKTARRTTTCAKAGAWCTCWWKAKRRCTCAASAYTTSTKGSAKGTCCAMTYASGA…
>AUT-400127691
AAGGAAGCTCTATTAGATACAGGAGCAGATGATACAGTATTAGAAGAAATGAGTTTGCCAGGAAAATGGAGGCCAAAAATGATAGGGGGAATTGGAGGTTTTATCAAAGTAARACAGTATGATCAAGTACACATAGAAATCTGTGGAAGTAAAGTTRTAGGTACAGTATTAGTAGGGCCTACACCTGTCAACATAATTGGAAGAAATCTGTTGACTCAGCTTGGTTGCACTTTAAATTTTGAAATGGAAAAGGAAGGGAAAATTTCAAAAATTGGGCCTGAGAATCCATATAATACTCCAGTGTTTGCTATAAAGAAAAARGACAGTACTAAATGGAGAAAATTAGTAGATTTCAGAGAACTTAAGAAAACTCAAGACTTCTGGGAAGTTCAATTAGGA…
>AUT-400127769
ATAGAAGCCCTATTAGACACAGGAGCAGATGATACAGTATTAGAAGAAATAAATTTACCAGGAAAATGGAAACCAAAAATGATAGGGGGAATTGGAGGCTTTATCAAAGTAAGACAGTATGATCAGATACTTRTAGAAATTTGTGGAAAAAGGGCCATAGGTACAGTATTAGTAGGRCCTACACCTGTCAACATAATTGGACGAAATATGTTGACTCAGATTGGTTGTACTTTAAATTTTGAGATGGAAAGGGAAGGAAAAATTTCAAGRATTGGSCCTGAAAATCCATACAATACTCCAGTATTTGCCATAAAGAAAAAGGACAGTACTAAATGGAGAAAATTAGTAGATTTCAGAGAACTCAAGAGAACTCAAGACTTTTGGGAAGTTCAATTAGGA…
>AUT-400127808
ATAGAAGCCCTATTAGACACAGGAGCAGATGATACAGTATTAGAACAAATAAGTTTACCAGGAAAATGGAAACCAAAAATGATAGGGGGAATTGGAGGATTTATCAAAGTAAAACAGTATGATCAAATAHCTATAGAAATTGAGGGGAAAAAGGCTATAGGGACAGTATTAATAGGACCAACACCTATCAACATAATTGGAAGAAATATGTTGACTCAGATTGGTTGTACTTTAAATTTTGAAATGGAAAAGGAAGGAAAAATTTCAAAAATTGGGCCTGAAAATCCATACAACACTCCAATATTTGCCATAAAGAAAAAAGACAGTACTAAGTGGAGAAAATTGGTAGATTTCAGAGAGCTCAAAAGAACTCAAGACTTCTGGGAGGTCCAATTAGGT…
>AUT-400127934
AAGGAAGCTCTATTAGATACAGGAGCAGATGATACAGTATTAGAAGAAATAAATTTGCCAGGAAAATGGAAACCAAAAATGATAGGGGGAATTGGAGGCTTTATCAAAGTAAGACAGTATGATCAAATACTCGTAGAAATCTGTGGACATAAAGCTATAGGTACAGTATTAGTAGGACCYACACCTGTCAACATAATTGGAAGAAATTTGTTGACTCAGATTGGTTGCACTTTAAATTTTGAAATGGAAAAGGAAGGAAAAATTTCAAGAATTGGGCCTGAAAATCCATACAATACTCCAATATTTGCCATAAAGAAAAAAGAYAGTACTAARTGGAGAAAATTAGTAGATTTCAGAGAACTTAAGAGGACTCAAGACTTCTGGGAAGTTCAACTAGGA…
>AUT-400127935
AAGGAAGCTCTATTAGATACAGGAGCAGATGATACAGTATTAGAAGAAATGAATTTGCCAGGAAAATGGAGACCAAAAATGATAGGGGGAATTGGAGGTTTCATCAAAGTAAGACAGTATGATCAGATACCCATAGAAATCTGTGGGCATAAGGCTATAGGTACAGTCTTAGTAGGACCTACACCTGTCAACATAATTGGAAGAAATCTGTTGACTCAGCTTGGATGCACTTTAAATTTTGAAATGGAAAAGGAAGGAAAAATTTCAAAAATTGGACCTGAAAATCCATACAATACTCCAGTATTTGCCATAAAGAAAAAAGACAGTACTAAATGGAGAAAATTAGTAGACTTCAGAGAACTTAAGAAAACTCAAGACTTCTGGGAAGTTCAATTAGGA…
>AUT-400127971
AAGGAAGCTCTATTAGAYACAGGAGCAGATGATACAGTATTAGAAGACATARATTTGCCAGGAAGATGGAAACCAAAAATGATAGGGGGAATTGGAGGTTTTATCAAAGTAAGACAGTATGATCAARTACCCATAGAAATCTGTGGACATAAAGCCATAGGTACAGTATTAATAGGACCTACACCTGTCAACATAATTGGAAGAAATCTGTTGACTCAGATTGGTTGCACTTTAAATTTTGAAATGGAAAAGGAAGGRAAAATTTCAAAAATTGGGCCTGAAAATCCATATAATACTCCAGTATTTGCCATAAAGAAAAAAGACARTACTAAATGGAGAAAATTAGTAGATTTCAGAGAACTTAAGAGAACTCAAGACTTCTGTGAAGTTCAATTAGGG…
>AUT-400128062
AAGGAAGCTCTATTAGACACAGGAGCAGATGATACAGTATTAGAAGAAATGAATTTACCAGGAAGATGGAAACCAAAAATGATAGGGGGAATTGGAGGTTTTATCAAAGTAAGACAGTATGATCAGATACCCATAGAAATCTGTGGGCATAAARCTGWAGGTACAGTCTTAGTAGGACCTACACCTGTCAACATAATTGGAAGAAATCTGTTGACTCAGATTGGTTGCACTTTAAATTTTGAAATGGAAAAGGAAGGGAAAATTTCAAAAATTGGGCCTGAAAATCCATACAATACTCCAGTATTTGCCATAAAGAAAAAAGACAGTACTAAATGGAGAAAATTAGTAGATTTCAGAGAACTCAAGAGAACTCAAGACTTCTGGGAAGTTCAATTAGGA…
>AUT-400128091
AARGAAGCTCTATTAGATACAGGAGCAGATGATACAGTAGTAGAAGAAATGTGYTTRCCAGGAAGATGGAAACCAAAAATGATAGGGGGAATTGGAGGTTTTATCAAAGTAAGACAGTATGATCAGATATGCATAGAAATCTGTGGACATAAAGCTATAGGTACAGTATTAGTAGGACCTACACCTGTCAACATAATTGGAAGAAATATGTTGACTCAGATAGGTTGCACTTTAAATTTTGAAATGGAAAAGGAAGGRAAAATTTCAAAAATTGGGCCTGAAAATCCATACAATACTCCAGTRTTTGCCATAAAGAAAAAAGAYGGTRCTAAATGGAGAAAATTAGTAGATTTCAGAGAACTTAAGAGAACTCAAGACTTYTGGGARGTTCAATTAGGA…
>AUT-400128173
AAGGAAGCTCTATTAGATACAGGAGCAGATGATACAGTATTAGAAGAAATAAATTTGCCAGGAAGATGGAAACCAAAAATGATAGGGGGAATTGGAGGTTTTATCAAAGTAAGACAGTATGATCAGATACCCATAGAGATCTGTGGACATAAAGCTATAGGTACAGTTTTAGTAGGACCTACACCTGTCAACATAATTGGAAGAAATCTGTTGACTCAGATTGGTTGTACTTTAAATTTTGAAATGGAAAAGGAAGGGAAAATTTCAAAGATTGGGCCTGAAAATCCATACAATACTCCAGTATTTGCCATAAAGAAAAAAGACAGTACTAAATGGAGAAAATTAGTAGATTTCAGAGAACTTAAGAGAACTCAAGACTTCTGGGAAGTTCAATTAGGA…
>AUT-400128262
ATAGAAGCCCTACTAGATACAGGAGCAGATGATACAGTATTAGAAGAAATRAATTTACCAGGAAAATGGAAACCAAAAATAATAGGGGGAATTGGAGGTTTTATCAAAGTAAGACAGTACGATCAAATACTTATAGAAATTTGTGGAAAAAAGGCCATAGGTACAGTATTAGTAGGACCTACACCTGTCAACATAATTGGACGAAATATGTTGACTCAGATTGGTTGTACTTTAAATTTTGACATGGAAAAGGAAGGAAAAATTTCAAAAATTGGGCCTGAAAATCCATACAATACTCCAGTATTTGCCATAAAGAAAAAAGATAGTACTAAATGGAGAAAATTAGTAGATTTCAGAGAACTCAAGAGAACTCAAGACTTCTGGGAGGTCCAATTAGGA…
>AUT-400128326
ATAGAAGCTCTATTAGATACAGGAGCAGATGATACAGTCTTAGAAGAAATAAATTTGCCAGGAAGATGGAAACCAAAAATGATAGGGGGAATTGGAGGTTTTATCAAAGTAAGACAGTATGATCAGATACTTATAGAAATTTGTGGGAAAAAGGCTATAGGTACAGTATTGGTAGGACCTACACCTGTCAACATAATTGGAAGAAATATGTTGACCCAGATTGGTTGTACTCTAAATTTCGAGATGGAAAAGGAAGGAAAAATTACAAGAATTGGGCCTGAAAATCCATACAATACTCCAGTATTTGCTATAAAGAAAAAGGACAGCACTAAATGGAGGAAATTAGTAGATTTCAGRGARCTAAAAAGAACTCAGGACTTCTGGGAAGTYCAATTAGGG…
>AUT-400128616
AAAGAAGCTCTATTAGATACAGGAGCAGATGATACAGTATTAGAAGAAATAAATTTGCCAGGAAAATGGAAACCAAAAATGATAGGGGGAATTGGAGGTTTTATCAAAGTAAGACAATATGAACAGATACCTATAGAAATTTATGGAAAAAAGGCTATAGGTACAGTATTAGTAGGACCTACACCTATCAACATAATTGGACGAAATATGTTGACTCAGCTTGGTTGTACTTTAAATTTCGAGATGGAAGAGGAAGGAAAAATCTCAAAAATTGGGCCTGAAAATCCATACAATACTCCAGTATTTGCTATAAAGAAAAAGGACAGTACCAAATGGAGAAAATTAGTAGATTTCAGAGAGCTCAAAAGAACTCAGGACTTTTGGGAAGTTCAATTAGGA…
>AUT-400128617
AAGGAAGCTCTATTAGATACAGGAGCAGATGATACAGTCTTAGAAGAAATGAGTTTGCCAGGAAGATGGAAACCAAAAATGATAGGGGGAATTGGAGGTTTTATCAAAGTAAGACAGTATGATCAAATACYAGTAGAAATTTGTGGACAAAAAGCTATAGGTACAGTATTAATAGGACCTACACCTGTCAACATAATTGGAAGAAATCTGTTGACTCAGATCGGTTGCACTTTAAATTTTGAAATGGAAAAAGAAGGAAAAATTTCAAAAATTGGGCCTGAAAATCCATACAATACTCCAGTGTTTGCCATAAAGAAAAAAGACAGTACTAAATGGAGAAAATTAGTAGATTTCAGAGAACTTAAGAGAACTCAAGACTTCTGGGAAGTTCAATTAGGA…
>AUT-400128618
AAGGAAGCTCTATTAGATACAGGAGCAGATGATACAGTATTAGAAGAAATGAATTTGCCAGGAAAATGGAGACCAAAAATGATAGGGGGAATTGGAGGTTTCATCAAAGTAAGACAGTATGATCAGATACCCATAGAAATCTGTGGGCATAAGGCTATAGGTACAGTCTTAGTAGGACCTACACCTGTCAACATAATTGGAAGAAATCTGTTGACTCAGCTTGGATGCACTTTAAATTTTGAAATGGAAAAGGAAGGAAAAATTTCAAAAATTGGACCTGAAAATCCATACAATACTCCAGTATTTGCCATAAAGAAAAAAGACAGTACTAAATGGAGAAAATTAGTAGACTTCAGAGAACTYAAGAAAACTCAAGACTTCTGGGAAGTTCAATTAGGA…
>AUT-400128634
AAGGAAGCTCTATTAGATACAGGAGCAGATGATACAGTATTAGAAGAAATAGATTTGCCAGGGAGGTGGAAACCAAAAATGATAGGGGGAATTGGAGGTTTTATCAAAGTAAGACAGTATGATCAAATACTTGTAGAAATTTGTGGGCATAAAGCTATAGGTACAGTATTAGTAGGACCTACACCTGTCAACATAATTGGAAGAAATTTGTTGACTCAGCTTGGTTGCACTTTAAATTTTGAAATGGAAAAGGAAGGGAAAATTTCAAAAATTGGGCCTGAAAATCCATATAATACTCCAGTATTTGCCATAAAGAAAAAAGACAGTACTAAATGGAGAAAACTAGTAGATTTCAGAGAACTTAAGAAAACTCAAGACTTCTGGGAAGTTCAATTAGGA…
>AUT-400128714
AAGGAAGCTCTATTAGATACAGGAGCAGATGATACAGTATTAGAAGAAATGAATTTGCCAGGAAGATGGAARCCAAAAATGATAGGGGGAATTGGAGGTTTTATCAAAGTAAGRCARTATGATCAAGTAYCCATAGAAATCTGTGGACATAAAGCCATAGGTACAGTATTAGTAGGACCTACACCTGTCAACATAATTGGAAGAAATCTGTTGACTCAGATTGGTTGCACTTTAAATTTTGAAATGGAAAAGGAAGGGAAAATTTCRAAAATTGGGCCTGAAAAYCCATATAATACTCCAGTATTTGCCATAAAGAAAAAAGACAGTACTAAATGGAGAAAATTAGTAGATTTYAGAGAACTTAAGAGAACTCAAGAYTTCTGGGAAGTTCAATTAGGA…
>AUT-400128715
AAGGAAGCTTTATTAGATACAGGAGCAGATGATACAGTATTAGAAGAYATAAATTTGCCAGGGAGATGGAGACCAAAAATGATAGGGGGAATTGGAGGTTTTATCAAAGTAAGACAGTATGATCAAGTACCCATAGAAATCTGTGARMAAAAGGTTATAGGTACAGTATTAATAGGACCTACACCTGTCAACATAATTGGAAGAAATCTGTTGACTCAGCTTGGTTGCACTTTAAATTTTGAAATGGAAAAGGAAGGAAAAATTTCAAAAATTGGGCCTGAAAATCCATATAATACTCCAATATTTGCCATAAAGAAAAAAGACAGTACTAAATGGAGGAAATTAGTAGATTTCAGAGARCTTAAGAGAACTCAAGACTTCTGGGAAGTTCAATTAGGA…
>AUT-400128861
AAGGAAGCTCTATTAGATACAGGAGCAGATGATACAGTATTAGAAGAAATGAATTTGCCAGGAAGATGGAGACCAAAAATGATAGGGGGAATTGGAGGTTTTATCAAAGTAAGACAGTATGATCAAATACCCATAGAAATCTGTGGAAATAAAGCTATAGGTACAGTATTAGTAGGACCTACACCTGTCAACATAATTGGAAGAAATCTGTTGACTCAGATTGGTTGCACTTTAAATTTTGAAATGGAAAAGGAAGGAAAAATTTCAAAAATTGGGCCTGAAAATCCATAYAATACTCCARTATTTGCYATAAAGAAAAAAGACAGTACTAAATGGAGAAAATTAGTAGATTTCAGAGAACTTAAGARAACTCAAGACTTCTGGGAAGTTCAATTAGGA…
>AUT-400128977
ATAGAAGCCCTATTAGACACAGGAGCAGATGATACAGTATTAGAAGAAATACATTTACCAGGAAAATGGAAACCAAAAATGATAGGGGGAATTGGAGGTTTTATTAAAGTAAGACAATATGATCAAATACTCATAGAAATCTGTGGAAAAAAGGCTATAGGTACAGTGTTAGTAGGACCTACACCTGTCAACATAATTGGGCGAAATATGTTGACTCAGATTGGTTGTACTTTAAATTTTGAGATGGAAAAGGAAGGAAAAATTTCAAAAATTGGGCCTGAAAATCCATACAATACTCCAGTATTTGCCATAAAGAAAAAAGATAGTACTAAATGGAGAAAATTAGTAGACTTCAGAGAACTTAAAAGAACTCAAGACTTCTGGGAGGTCCAATTAGGA…
>AUT-400128979
AAAGARGCTCTYTTGGACACAGGAGCAGATGATACAGTATTAGAAGARAYRAAGTTGCCAGGGARCTGGAAACCAAAAATGATAGGAGGAATTGGAGGTTTTATCAAAGTAAGACAGTATGATCAAATAACTATAGAAATTTGTGGAAAAAAGGCTATAGGTACAGTATTAGTGGGACCTACACCTGTCAACATAATTGGAAGAAATCTGTTGACTCAGCTTGGATGCACACTAAATTTTGAAATGGAAAARGAGGGAAAAATTACAAAAATCGGGCCTGAAAATCCATATAACACTCCAGTATTTGCCATAAAAAAGAAGGACAGTACTAAGTGGAGAAAATTAGTAGATTTCAGGGARCTCAAAAGAACCCAAGACTTTTGGGAAGTCCAATTAGGA…
>AUT-400128991
AAGGAGGCTCTATTAGATACAGGAGCAGATGATACAGTATTAGAAGAAATGAATTTGCCAGGAAGATGGAGACCAAAAATGATAGGGGGAATTGGAGGTTTTATCAAAGTAARACAGTATGATGARATACCCATAGAAATYTGTGGRCATAAAGCTRTAGGTACAGTRTTAATAGGACCTACACCTGTCAACATAATTGGAAGAAATCTGTTGACTCAGCTTGGTTGCACTTTAAATTTTGAAATGGARAARGAAGGRAAAATTTCAAAAATTGGGCCTGAAAATCCATATAATACTCCAGTATTTGCAATAAAGAAAAAGGACAGTACTAAATGGAGAAAATTAGTAGATTTCAGAGAACTTAAGAGAACTCAAGACTTCTGGGAAGTACAATTAGGA…
>AUT-400129048
ATAGAAGCYCTATTAGACACAGGAGCAGATGATACAGTATTAGAAGAAATAGATTTACCAGGAAAATGGAGACCAAAAATGATAGGGGGAATTGGAGGTTTTATCAAAGTAAGACAATATGATCAGATACTTATAGAAATTGAAGGAAAAAGGGCTATAGGGACAGTACTAGTAGGACCTACACCTATCAACATAATTGGGAGAAATATGTTGACTCAGATTGGTTGTACTTTAAATTTTGAAATGGAAAAGGAAGGAAAAATTTCAAAAATTGGGCCTGAAAATCCATACAATACTCCAGTATTTGCCATAAAGAAAAAAGATAGCACTAAATGGAGAAAATTAGTAGATTTCAGAGAACTCAAGAGAACTCAAGACTTCTGGGAGGTCCAATTAGGA…
>AUT-400129218
ATAGAAGCTCTATTAGACACAGGAGCAGATGATACAGTATTAGAACAAATAGATTTACCAGGAAAATGGAAACCAAGAATGATAGGGGGAATTGGAGGATTTATCAAAGTAAAACAGTATGAGCAAATACTTATAGAAATTGAAGGGAAAAAGGCTATAGGGACAGTACTAGTAGGACCTACACCTATCAACATAATTGGGAGAAATATGTTGACTCAGATTGGTTGTACTTTAAATTTTGAGATGGAAAAGGAAGGGAAAATCTCAAAAATTGGGCCTGAAAATCCATACAACACTCCAATATTTGCCATAAAGAAAAAAGACAGTACTAAATGGAGAAAATTGGTAGATTTCAGAGAGCTYAAAAGAACTCAAGACTTCTGGGAGGTCCAATTAGGC…
>AUT-400129237
AAGGAAGCTCTATTAGATACAGGAGCAGATGATACAGTRTTAGAAGAYATAGATTTGCCAGGAAGATGGAGACCAAAAATGATAGGGGGAATTGGGGGTTTTATCAAAGTAAGACAGTATGATCAAGTACCCATAGAAATCTGTGGGCATAAAGCYATAGGTACAGTATTAGTAGGACCTACACCTGTCAACATAATTGGAAGAAATCTGTTGACTAAGATTGGTTGCACTTTAAATTTTGAAATGGAAAAGGAAGGGAAAATYTCAAAAATTGGGCCTGAAAATCCATATAATACTCCAGTATTTGCCATAAAGAAAAAAGACAGTACTAAATGGAGAAAATTAGTAGATTTCAGAGAGCTTAAGAAAACTCARGACTTCTGGGAAGTTCAATTAGGA…
>AUT-400129239
AARGAAGCTCTATTAGATACAGGAGCAGATGATACAGTAKTAGAAGAARTAAATTTGCCAGGAAGATGGAAACCAAAAATGATAGGGGGAATTGGAGGTTTTATCAAAGTAAGACAGTATGATCAGGTACCCATAGAAATCTGTGGAAATAAAGCTATAGGTACARTATTAGTAGGACCTACACCTGTCAACATAATTGGAAGAAATCTGTTGACTCAGATTGGTTGCACTTTAAATTTYGAAATGGAAAAGGAAGGAAAAATTTCAAAAATTGGGCCTGAAAATCCATACAATACTCCAGTATTTGCCATAAAGAARAAGGACAGTACTAAATGGAGAAAATTAGTAGATTTCAGGGAACTTAAGAAAACTCAAGACTTCTGGGAAGTTCAAYTAGGR…
>AUT-400129445
AAGGAAGCTCTATTAGATACAGGAGCAGATGATACAGTATTAGAAGAMATGAATTTGCCAGGAAGATGGAAACCAAAAATGATAGGRGGAATTGGAGGTTTTATTAAAGTAAGACAGTATGATARCATARCWGTAGAAATCTGTGGAATYAAAGCTAYAGGTACAGTRTTAGTAGGACCTACACCTGTCAACATAATTGGAAGAAATCTGTTGACTCAGATTGGTTGCACTTTAAATTTTGAAATGGARAAGGAAGGGAAAATTTCAAAAATTGGGCCTGAAAATCCATATAATACTCCAGTATTTGCCATAAAGAAAAAAGACAGTACTAARTGGAGAAAGTTAGTAGATTTYAGAGAACTTAAGAGAACTCAAGACTTCTGGGAAGTTCAATTAGGA…
>AUT-400129604
AAGGAAGCTCTATTAGATACAGGAGCAGATGATACAGTATTAGAAGAAATAGATTTGCCAGGAAGATGGAAACCAAAAATGATAGGGGGAATTGGAGGTTTTATCAAAGTAAGACAGTATGATCAAATAGYCATAGAAATCTGTGGAAAGAAAGCTATAGGTACAGTATTAGTAGGACCTACACCTGTCAACATAATTGGAAGAAATCTGTTGACTCAGATTGGTTGCACTTTAAATTTTGAAATGGAAAAGGAAGGRAAAATTTCAAAAATTGGGCCTGAAAATCCATATAATACWCCAGTATTTGCCATAAAGAAAAAAGACAGTACTAAATGGAGAAAATTAGTAGATTTCAGAGAGCTTAAGAAAACTCAAGACTTCTGGGAAGTGCAATTAGGA…
>AUT-400129605
AARGAGGCTCTCTTAGATACAGGAGCAGATGATACAGTATTAGAAGATATAAATTTGCCAGGAAAATGGAAACCAAAAATGATAGGAGGAATTGGAGGTTTTATCAAAGTAAGACARTATGATCAAATACTTATAGAAATTTGTGGAAAAAAGGCTATAGGTACAGTATTAGTAGGGCCTACACCTGTCAACATAATTGGAAGAAACATGTTGACTCAGCTTGGATGCACACTAAATTTTGAAATGGAGAAGGAAGGAAAAATTACAAAAATTGGGCCTGAAAATCCATATAACACTCCAATATTTGCCATAAAAAAGAAGGACAGTACTAAGTGGAGAAAATTAGTAGATTTCAGGGAACTTAAAAGAACTCAAGACTTTTGGGAAGTTCAATTAGGA…
>AUT-400129608
ATAGAAGCTCTATTAGATACAGGAGCAGATGATACAGTCTTAGAAGAAATARATTTGCCAGGAAGATGGAAACCAAAAATGATAGGGGGAATTGGAGGTTTTATCAAAGTAAGACAGTATGATCAGATACTTATAGAAATTTGTGGAAAAAAGGCTATAGGYACAGTATTGGTAGGACCTACACCTGTCAACATAATTGGAAGRAATATGTTGACCCAGATTGGTTGTACTCTAAATTTYGAGATGGAAAAGGAAGGAAAAATTACAARAATTGGGCCTGAAAATCCATACAATACTCCAGTATTTGCTATAAAGAAAAAGGACAGCACTAAATGGAGRAAATTAGTAGATTTCAGAGAGCTAAAAAGAACTCAGGACTTCTGGGAAGTTCAATTAGGG…
>AUT-400129655
ATAGAAGCTCTATTRGATACAGGAGCAGATGATACAGTCTTAGAAGAAATAGATTTGCCAGGAAGATGGAAACCAAAAATGATAGGGGGAATTGGAGGTTTTATCAAAGTAAGACAGTATGATCAGATACTTATAGAAATTTGTGGAAAAAAGGCTATAGGTACAGTATTRGTAGGACCTACACCTGTCAACATAATTGGAAGGAATATGTTGACCCAGATTGGTTGTACTCTAAATTTTGAGATGGAAAAGGAAGGAAAAATTACAAAAATTGGGCCTGAAAATCCATACAATACTCCAGTATTTGCTATAAAGAAAAAGGATAGCACTAAATGGAGGAAATTAGTAGATTTCAGAGAACTAAAAAGAACTCAGGATTTCTGGGAAGTTCAATTAGGG…
>AUT-400129684
AAAGAAGCTCTATTAGATACAGGAGCAGATGATACAGTATTAGAAGATATAAATTTGCCAGGAAAATGGAAGCCAAAAATGATAGGGGGAATTGGAGGTTTTATCAAGGTAAGGCAATATGATCAGATACTTATAGAAATTTGTGGAAAAAAAGCTATAGGTACAGTGTTAGTAGGACCTACACCTGTCAATATAATTGGACGAAATATGTTGACTCAGATTGGATGTACTTTAAATTTCGAGATGGAAGAGGAAGGAAAAATCTCAAAAATTGGGCCTGAAAACCCATACAATACTCCGGTATTTGCTATAAAGAAAAAGGACAGCACCAAATGGAGAAAATTAGTAGATTTCAGAGAGCTCAAAAGAACTCAGGACTTTTGGGAAGTTCAATTAGGA…
>AUT-400129703
ARGGAGGCTCTCTTAGATACAGGAGCAGATGACACAGTATTAGAAGATATAAATTTGCCAGGAAAATGGAAACCAAAAATGATAGGAGGAATTGGAGGTTTTATCAAAGTAAGACAGTATGAKCAARTAACTATRGAAATTTGTGGAAAAAAGGCTATAGGTTCAGTATTAGTAGGACCTACACCTGTCAACATAATTGGAAGAAATATGTTGACTCAGCTKGGATGCACACTAAATTTTGAAATGGAGAAGGAAGGAAAAATTACAAAAATTGGGCCTGAAAATCCATATAACACTCCAGTATTTGCCATAAAAAAGAAGGAYAGTACTAAGTGGAGAAAATTAGTAGATTTCAGGGAACTCAAGAGAACTCAAGACTTTTGGGAAGTTCAATTAGGA…
>AUT-400129704
AAGGAAGCTCTATTAGATACAGGAGCAGATGATACAGTATTAGAAGAAATGGATTTGCCAGGAAGATGGAAACCAAAAATGATAGGGGGAATTGGAGGTTTTATCAAAGTAAGACAGTATGAKCAAATACTCATAGAAATTTGTGGAAAGAAAGCTATAGGTACAGTATTAGTAGGACCTACACCTGTCAACATAATTGGAAGAAATCTGTTGACTCAGMTRGGTTGCACTYTAAATTTTGAAATGGARAARGAAGGGAAAATTTCAAAAATTGGGCCTGAAAATCCATATAATACTCCAATATTTGCTATAAAGAAAAAAGACAGTACTAAATGGAGAAAATTAGTAGATTTCAGAGAACTTAAGAAAACTCAAGACTTCTGGGAAGTTCAATTAGGA…
>AUT-400129899
AAGGAAGCTCTATTRGATACAGGGGCAGATGATACAGTATTAGAAGAAATGACTTTGCCAGGAAGATGGAAACCAAAAATGATAGGGGGAATTGGAGGTTTTATCAAAGTAAGACAGTATGATCAAATACCCATAGAAATCTGTGGGWRTAAAGCYATAGGTACAGTATTAATAGGACCTACACCTGTCAACATAATTGGAAGAAATCTGTTGACTCAGATTGGTTGCACTTTAAATTTTGAAATGGAAAAGGAAGGRAAAATTTCAAAAATTGGGCCTGAAAATCCATATAATACTCCAATATTTGCCATAAAGAAAAAAGACAGTACTAAATGGAGAAAATTAGTAGATTTCAGAGAACTTAAGAAAACTCAAGACTTCTGGGAAGTTCARTTAGGA…
>AUT-400129957
ATAGAAGCCCTATTAGACACAGGAGCAGATGATACAGTATTGGAAGACATAAATTTACCAGGAAAATGGAAACCAAAAATGATAGGGGGAATTGGAGGTTTTATCAAAGTAAGACAGTATGAGGAAGTAACTATGGAAATTAATGGAAAAAGGGCTATAGGGACAGTGTTAGTAGGACCTACACCTATCAAYATAATTGGRAGAAATATGTTGACTCAGATTGGTTGTACTTTAAATTTTGAAATGGAAAAGGAAGGAAAAATTTCAAAAATTGGGCCTGAAAATCCATACAATACTCCAATATTTGCTATAAAGAAAAAAGACAGTTCTAAATGGAGAAAATTAGTAGATTTCAGAGAGCTCAAAAGAACTCAAGACTTCTGGGAGGTCCAATTAGGA…
>AUT-400130027
ATAGAAGCTCTATTAGACACAGGAGCAGATGATACAGTATTAGAACAAATAGATTTACCTGGAAAATGGAAACCAAAAATGATAGGGGGAATTGGAGGATTTATTAAAGTAAGACAGTATGATCAAATACTTATAGAAATTGAAGGGAAAAAGGCTATAGGGACAGTACTAGTAGGACCTACACCTATCAACATAATTGGGAGAAATATGTTGACTCAGATTGGTTGTACTTTAAATTTTGAWATGGAAAARGAAGGGAAAATTTCAAAAATTGGGCCTGAAAATCCATACAACACTCCAATATTTGCCATAAAGAAAAAAGACAGTACTAAATGGAGAAAATTGGTAGATTTCAGAGAGCTTAAAAGAACTCAAGACTTCTGGGAGGTCCAATTAGGC…
>AUT-400130113
AGAGAAGCTCTATTAGATACAGGAGCAGATGATACAGTATTAGAAGATATAAATTTGCMAGGAAAATGGAAACCAAAAATGATAGGGGGAATTGGAGGYTTTATCAAAGTAAGACAATATGATCAGATAACTATAGAAATTTATGGAAAAAAGGCTATAGGTACAGTGTTAGTAGGACCTACACCTGTCAACATAATTGGACGAAATATGTTGACTCAGATTGGTTGTACTTTAAATTTCGAGATGGAAGAGGAAGGAAARATCTCAAAAATTGGGCCTGAAAATCCATACAATACTCCAGTATTTGCTATAAAGAAAAAGGACAGCAMCAAATGGAGGAAATTAGTAGATTTCAGAGAGCTCAAAAGAACTCARGACTTTTGGGAAGTTCAATTAGGA…
>AUT-400130116
ATAGAGGCCCTATTAGACACAGGAGCAGATGATACAGTATTAGAAGACATAAATTTACCAGGAAAATGGAAACCAAAAATGATAGGGGGAATTGGAGGTTTTATTAAAGTAAGACAATATGATCAGATACTTATGGAAATTTGTGGGAAAAAGGCCATAGGTACAGTCTTAGTAGGACCTACACCTGTCAACATAATTGGACGAAATATGTTGACTCAGATTGGGTGTACTTTAAATTTTGAAATGGAAAAGGAAGGAAAAATTTCAAAAATTGGGCCTGAAAACCCATACAATACTCCAATATTTGCCATAAAGAAAAAAGATAGTACTAAATGGAGAAAATTAGTAGATTTCAGAGAACTTAAGAGAACTCAAGACTTTTGGGAGGTCCAATTAGGA…
>AUT-400130117
AAGGAAGCTCTATTAGATACAGGAGCAGATGATACAGTATTAGAAGAAATGCATTTACCAGGAAAATGGAAACCAAGAATGATAGGGGGAATTGGAGGTTTTATCAAAGTAAAACAGTATGATCAGATAACCATAGAAATCTGTGGACATAAAGCTATAGGTACAGTGTTAGTAGGACCTACACCTGTCAACATAATTGGAAGAAATCTGTTGACCCAGATTGGCTGCACTTTAAATTTTGAAATGGAAAAGGAAGGAAAAATTTCAAGAATTGGGCCTGAAAATCCATACAATACCCCAGTATTTGCCATAAAGAAAAAAGATAGTACTAAATGGAGAAAATTAGTAGATTTCAGAGAACTTAAGAGAACTCAAGACTTCTGGGAAGTTCAATTAGGA…
>AUT-400130284
AAGGAAGCTCTATTAGATACAGGRGCAGATGATACAGTATTAGAAGACATGAGTTTGCCAGGAAGATGGAAGCCAAAAATGATAGGGGGAATTGGAGGYTTTATCAAAGTAARRCAGTATGATCAARTACTYATAGAAATYTGTGGACATAAAGCTATAGGTACAGTATTAGTAGGACCTACACCKGTCAACATAATTGGAAGAAATCTGTTGACTCAGATTGGTTGCACTTTRAATTTTGAAATGGAAAAGGAAGGGAAAATTTCAAAAATTGGGCCTGAAAATCCATATAATACYCCARTATTTGCCATAAAGAAAAAAGAYAGTACTAAATGGAGRAAATTRGTAGATTTCAGRGAACTKAAGAAAACTCAAGAYTTCTGGGAAGTTCAATTRGGA…
>AUT-400130403
AAGGAAGCTCTATTAGATACAGGAGCWGATGATACAGTATTAGAAGAAATGAATTTGCCAGGAAGATGGAAACCAAAAATGATAGGGGGAATTGGAGGTTTTATCAAAGTAARACAGTATGATCAGATACCCATAGAAATCTGTGGGCATAAGGCTRTAGGTACAGTCTTAGTAGGACCTACACCTGTCAACATAATTGGAAGAAATCTGTTGACTCAGATTGGATGCACTTTAAATTTTGAAATGGAAAAGGAAGGAAAAATTTCAAAAATTGGGCCTGAAAATCCATATAATACTCCAGTATTTGCCATAAAGAAAAAAGACAGTACTAAATGGAGAAAATTAGTAGATTTYAGAGAACTTAAGAAAACTCAAGACTTYTGGGAAGTTCAATTAGGA…
>AUT-400130417
AAGGAAGCTCTRTTAGATACAGGAGCAGATGAYACAGTATTAGAAGAAATGAATTTGCCAGGAAGATGGAAACCAAAAATGATAGGGGGAATTGGAGGTTTTATCAAAGTAAGACAGTATGATCAGATAACCATAGAAATCTGTGGACATAAAGCTRTAGGTACAGTATTAATAGGACCTACACCTGTCAACATAATTGGAAGGAATCTGTTGACTCAGATTGGKTGCACTYTAAATTTTGAAATGGAAAAGGARGGGAAAATTTCAAAAATTGGGCCTGAAAATCCATATAATACTCCAGTATTTGCCATAAAGAAAAAAGACAGTACTAAATGGAGAAAATTAGTAGATTTCAGAGAACTTAAGAGAACYCAAGACTTCTGGGAAGTTCAGTTAGGA…
>AUT-400130454
AGGGAAGCTCTATTGGATACAGGAGCAGATGATACAGTATTAGAAGAAATGGATTTGCCAGGAAGATGGAAACCAAAAATGATAGGGGGAATTGGAGGTTTTATCAAAGTAAGACAGTATGATCAARTACYCATRGAAATCWGTGGAAARAAAGCTATAGGTACAGTATTAGTAGGACCTACACCTGTCAACATAATTGGAAGAAATCTGTTGACTCAGATTGGTTGCACTTTAAATTTTGAAATGGAGAAGGAAGGGAAAATTTCAARAATTGGGCCTGAAAAYCCATATAATACTCCAATATTTGCTATAAAGAAAAAARACAGTACTAGATGGAGAAARTTAGTAGAYTTCAGAGAACTTAAGARAACYCAAGAYTTCTGGGAAGTTCAATTAGGA…
>AUT-400130455
AAAGAAGCTCTATTAGATACAGGAGCAGATGATACAGTATTAGAAGACATAAATTTGACAGGAAAATGGAAGCCAAAAATGATAGGGGGAATTGGAGGGTTTATCAAAGTAAAACAGTATGATAACATAACCATAGATATTTGTGGACATAAGGCTATAGGTACAGTRTTAGTAGGACCTACGCCTGTCAACATAATTGGAAGAAATATGTTGACTCAGATTGGTTGCACTTTAAATTTTGATATGGAGAAAGAAGGAAAAATTTCAAAAATTGGGCCTGAAAATCCATACAATACTCCAGTATTTGCCATAAAGAAAAAAGACAGCACTAAATGGAGAAAATTAGTAGATTTTAGAGAACTWAAAAGAACTCAGGATTTTTGGGAAGTTCAATTRGGA…
>AUT-400130561
AAAGAAGCTCTATTAGATACAGGAGCAGATGATACAGTATTAGAAGATATAGATTTGCCAGGAAAATGGAAACCAAAAATGATAGGGGGAATTGGAGGTTTTATCAAAGTAAGGCAATATGATCAGATACTTATAGAAATTTGTGGAAAAAAGGCTATAGGTACAGTATTAGTAGGACCTACACCTGTCAACATAATTGGACGAAATATGTTGACTCAGATTGGTTGCACTTTAAATTTCGAGATGGAAGAGGAAGGAAAAATCTCAAAAATTGGGCCTGAAAATCCATACAATACTCCAGTATTTGCTATAAAGAAAAAGGACAGCACTAAATGGAGRAAATTAGTAGATTTCAGAGAGCTCAAAAGAACTCAGGACTTTTGGGAAGTTCAATTAGGA…
>AUT-400130790
AAGGAAGCTCTATTAGATACAGGAGCAGATGATACAGTATTAGAAGARATAAATTTRCCAGGAAGATGGAARCCAAAAATGATAGGGGGAATTGGAGGTTTTATCAAAGTAAGACAGTATGATCAAATACCCATAGAAATCTGTGGGAAGAAAGCTATAGGTACAGTATTAGTAGGACCTACACCTGTCAACATAATTGGAAGAAAYCTGTTGACTCAGCTTGGTTGCACTTTAAATTTTGAAATGGAAAAGGAAGGRAARATTTCAAAAATTGGGCCTGAAAAYCCATATAATACTCCARTATTTGCYATAAAGAAAAAAGACAGTACTAAATGGAGAAAATTAGTAGATTTCAGAGAACTTAAGARAACTCAAGACTTCTGGGAAGTYCAATTAGGR…
>AUT-400130916
AAGGAAGCTCTATTAGATACAGGAGCAGATGATACAGTATTAGARGAAATGAATTTRCCAGGAAGATGGAGACCAAAAATGATAGGGGGAATTGGAGGTTTTATCAAAGTAAGRCAGTATGATCAAATACCCATAGAAATCTGTGGAAAYAAAGCTATAGGTACAGTATTAGTAGGACCTACACCYGTCAACATAATTGGAAGAAATCTGTTGACTCAGATTGGTTGCACTTTAAATTTTGAAATGGAAAAGGAAGGGAAAATTTCAAAAATTGGGCCTGAAAATCCATATAATACTCCAATATTTGCCATAAAGAAAAAAGACAGTACTAAGTGGAGAAAATTAGTAGATTTCAGAGAACTTAAGAAAACTCAAGACTTCTGGGAAGTTCAATTAGGA…
>AUT-400131063
ATAGAAGCCCTATTAGACACAGGAGCAGATGATACAGTATTAGAAGAAATAAATTTACCAGGAAAATGGAAACCAAAAATGATAGGGGGAATTGGAGGTTTTATTAAAGTAAGACAATATGATCAAATACTCATAGAAATCTGTGGAAAAAAGGCTATAGGTACAGTGTTAGTAGGACCTACACCTGTCAACATAATTGGACGAAATATGTTGACTCAGATTGGTTGTACTTTAAATTTTGAGATGGAAAAGGAAGGAAAAATTTCAAAAATTGGGCCTGAAAATCCATACAATACTCCAGTATTTGCCATAAAGAAAAAAGATAGTACTAAATGGAGAAAATTAGTAGACTTCAGAGAACTTAAAAGAACTCAAGACTTCTGGGAGGTCCAATTAGGA…
>AUT-400131116
AAAGAAGCTCTATTAGATACAGGAGCAGATGATACAGTATTAGAAGACATAAATTTGCCAGGAAAATGGAAACCAAAAATGATAGGGGGAATTGGAGGTTTTATCAAGGTAAGACAGTATGATCAGATACTTATAGAAATTTGTGGAAAAAAGGCTATAGGTACGGTATTAGTAGGACCTACCCCTGTCAACATAATTGGAAGAAATATGTTGACTCAGCTTGGTTGTACTTTAAATTTTGAGATGGAAAAGGAAGGAAAAATTTCAARAATTGGGCCTGAAAATCCATACAATACTCCAGTATTTGCTATAAAGAAAAAGGACAGCACTAAGTGGAGAAAATTAGTAGATTTCAGGGAACTCAAAAGAACTCAGGACTTTTGGGAAGTTCAATTAGGA…
>AUT-400131117
AAAGAAGCTCTATTAGATACAGGAGCAGATGATACAGTATTAGAAAACATAGATTTGCCAGGAAAATGGAAACCAAAAATGATAGGGGGAATTGGAGGTTTTATCAARGTAAGACAATATGATCAAATACTTATAGAAATTTGTGGAAAAAAGGCTATAGGTACAGTATTAGTAGGACCTACKCCTGTCAACATAATTGGACGAAATATGTTGACTCAGATTGGCTGTACTTTAAATTTCGACATGGAAAAGGAAGGAAAAATTTCAAGRATTGGGCCTGAAAATCCATACAATACTCCAATATTTGCTATAAAGAAAAARGACAGCACTAAATGGAGAAAATTAGTAGATTTCAGAGAACTCAAAAGAACHCAGGACTTCTGGGAAGTYCARTTAGGA…
>AUT-400131252
AAAGAAGCTCTATTAGATACAGGAGCAGATGATACAGTATTAGAAGACATAGAGTTGCCAGGAAAATGGAAACCAAGAATGATAGGGGGAATTGGAGGTTTYATCAAAGTAAAACAGTATGATCAGATACTTATAGAAATTTGTGGAAAAAGGGCTATAGGTACAGTATTAGTAGGACCTACACCTGTCAACATAATTGGAAGAAACATGTTGACCCAGATTGGTTGTACTTTAAATTTCGARATGGAAAAGGAAGGAAAAATTTCAAAAATTGGGCCTGAAAATCCATACAATACTCCAATATTTGCAATAAAGAAAAAAGATAGCACTAAATGGAGGAAATTAGTAGATTTCAGAGAGCTCAAAAGAACACAAGACTTTTGGGAAGTTCAATTGGGA…
>AUT-400131367
AGAGAAGCTCTATTAGATACAGGRGCAGATGATACAGTATTAGAAGATATAAATCTGCCTGGAAAATGGAAACCAAAAATGATAGGGGGAATTGGAGGTTTTATCAAGGTAAAGCAATATGATCAGATACTTATAGAAATTTGTGGAAAAAAGGCTATAGGTACAGTATTAGTAGGACCTACACCTGTCAACATAATTGGACGAAATATGTTGACTCAGATTGGTTGTACTTTAAATTTCGAGATGGAAGAGGAAGGAAAAATYTCAAAAATTGGGCCTGAAAATCCATACAATACTCCAGTATTTGCTATAAAGAAAAAAGACAGCACYAAATGGAGGAAATTAGTAGATTTCAGAGAACTCAAAAGAACTCAGGAYTTTTGGGAAGTTCAATTAGGA…
>AUT-400131403
AAAGAAGCTCTATTAGATACAGGAGCAGATGATACAGTATTAGAAGATATAAATTTGCCAGGAAAATGGAAACCAAAAATGATAGGGGGAATTGGAGGTTTTATCAAAGTAAGGCAATATGATCAGATACTTATAGAAATTTGTGGAAAAAAGGCTATAGGTACAGTRTTAGTAGGACCTACACCTGTCAACATAATTGGACGAAATATGTTGACYCAGATTGGTTGTACTTTAAATTTCGARATGGAAAAGGAAGGAAAAATCTCAAAAATTGGGCCTGAAAATCCATACAATACTCCAGTATTTGCTATAAAGAAAAAGGACAGCACYAAATGGAGGAAATTAGTRGATTTCAGAGAGCTCAAAAGAACTCAGGAYTTTTGGGAAGTTCAATTAGGA…
>AUT-400131404
AAGGAAGCTCTATTAGATACAGGAGCAGATGATACAGTATTAGAAGACATGAATTTGCCAGGAAGGTGGAAACCAAAAATGATAGGGGGAATTGGAGGKTTTATCAAAGTAAGACAGTATGATCAGATACCCATAGAAATCTGTGGACATAAAGCTATAGGTACAGTGTTAGTAGGACCTACACCTGTCAACATAATTGGAAGAAATCTGTTGACTCAGCTTGGTTGTACTTTAAATTTTGAAATGGAAAAAGAAGGAAAAATTTCAAAAATTGGGCCTGAAAATCCATACAATACTCCAGTATTTGCCATAAAGAAAAAAGACAGTACTAGATGGAGAAAATTAGTAGATTTCAGAGAACTTAAGAGAACTCAAGACTTCTGGGAAGTTCAATTAGGA…
>AUT-400131468
AAAGAAGCTCTRTTAGATACAGGAGCAGATGATACAGTATTAGAAGATATAAATTTGCCAGGAAAATGGAAACCAAAAATGATAGGGGGAATTGGAGGTTTTATCAAGGTAAARCAATATGATCAGATACTTATAGAAATTTGTGGAAAAARGGCYATAGGTACAGTRTTAGTAGGACCTACACCTGTCAACATAATTGGAAGAAATATGTTGACTCAGATTGGTTGTACTTTAAATTTCGAGATGGAAGAGGAAGGAAAAATTTCAAAAATTGGGCCTGAAAATCCATACAATACTCCAGTATTTGCTATAAAGAAAAAGGACAGCACCAAATGGAGGAAATTAGTAGATTTCAGAGAGCTCAAAAGAACTCARGACTTTTGGGAAGTYCAATTAGGA…
>AUT-400131560
AAGGAAGCTCTATTAGATACAGGRGCAGATGATACAGTATTAGAAGAAATAAATTTGCCAGGAAGATGGAAGCCAAAAATGATAGGGGGAATTGGAGGTTTTATCAAAGTAAGACAGTATGATCAAATAGTTGTAGAAATCTGTGGAAAGAAAGCTATAGGTACAGTRTTAGTAGGACCTACACCTGTCAACATAATTGGAAGAAATCTGTTGACTCAGATTGGTTGCACTTTAAATTTTGAAATGGAAAAGGAAGGRAAAATTTCAAAAATTGGGCCTGAAAATCCATATAATACTCCAGTATTTGCYATAAAGAAAAAGGACAGTACTAAATGGAGAAAATTAGTAGATTTCAGAGAACTTAAGAARACTCAAGACTTYTGGGAAGTTCARTTAGGA…
>AUT-400131679
AAGGAAGCTCTATTAGATACAGGAGCAGATGATACAGTATTAGAAGAAATGAATTTGCCAGGAAGATGGAAACCAAAAATGATAGGGGGAATTGGAGGTTTTATCAAAGTAAGACAGTATGATCAAATACTCATAGAAATTTGTGGACATAAAGCTGTAGGTACAGTATTAGTAGGACCTACACCTGTCAACATAATTGGAAGAAATCTGTTGACTCARATTGGCTGTACTTTAAATTTTGAAATGGAAAAGGAAGGGAAAATTTCAAAAATTGGGCCTGAAAATCCATACAATACTCCAGTATTTGCCATAAAGAAAAAGGACAGTACTAAATGGAGAAAATTAGTAGATTTCAGAGAACTTAARAGAACTCAAGATTTYTGGGAAGTTCAATTAGGA…
>AUT-400131686
AAAGAAGCTCTATTAGATACAGGAGCAGATGATACAGTATTAGAAGATATAAATTTGCCAGGAAAATGGAAACCAAGAATGATAGGGGGAATTGGAGGTTTTATCAAGGTAAGACAATATGATCAGATATCTATAGAAATTTGTGGAAAAAAGGCTATAGGTACAGTATTAGTAGGACCTACACCTGTCAACATAATTGGAAGAAATATGTTGACTCAGCTTGGTTGTACTTTAAATTTTGAGATGGAAAAGGAAGGAAAAATTTCAAGAATTGGGCCTGAAAATCCATACAATACTCCAATATTTGCTATAAAGAAAAAGGATAGCACTAAATGGAGAAAATTAGTAGATTTTAGAGAGCTCAAAAGAACACAGGACTTCTGGGAAGTTCAATTAGGA…
>AUT-400131946
AAGGARGCTCTATTAGATACAGGAGCAGATGATACAGTATTAGAAGAAATGAATTTGCCAGGAAGATGGAGACCAAAAATGATAGGGGGAATTGGAGGTTTTATCAAAGTAAGACAGTATGATCAAATACCCATAGAAATCTGTGAVAARAARGTTATAGGTACAGTATTAGTRGGACCTACACCTGTCAACATAATTGGAAGRAATCTGTTGACTCAGCTTGGTTGCACTTTAAATTTTGAAATGGAAAAGGAAGGGAAAATTTCAAGAATTGGGCCTGAAAATCCATATAATACTCCAATATTTGCYATAAAGAAAAAAGACAGTACTAAATGGAGRAAATTAGTAGATTTCAGAGAACTTAAGARAACTCAAGACTTCTGGGAAGTTCARTTAGGA…
>AUT-400132247
AAAGAAGCTCTATTAGATACAGGAGCAGATGATACAGTATTAGAAGACATAAATTTGCCAGGAAAATGGAAACCAAAAATGATAGGGGGAATTGGAGGTTTTATCAAGGTAAGACAGTATGATCAGATACTTATAGAAATCTGTGGAAAAAAGGCTATCGGTACGGTATTAGTAGGACCTACCCCTGTCAACATAATTGGAAGAAACATGTTGACTCAGCTTGGTTGTACTTTAAATTTTGAGATGGAAAAGGAAGGAAAAATTTCAAAAATTGGGCCTGAAAATCCATACAATACTCCAGTATTTGCTATAAAGAAAAAAGACAGCACTAAGTGGAGGAAATTAGTAGATTTCAGGGAGCTCAAAAGAACTCAGGACTTTTGGGAAGTTCAATTAGGA…
>AUT-400132644
AGGGAAGCTTTATTAGATACAGGAGCAGATGATACAGTATTAGAAGACATAAATTTGCCAGGAAAATGGAAGCCAAAAATGATAGGGGGAATTGGAGGTTTTATCAAAGTAAAACAGTATGATCAAATAACCATAGATATTTGTGGACAYAARGCTRYAGGTACAGTGTTAGTAGGACCTACACCTGTCAACATAATTGGAAGAAAYATGTTGACTCAGATTGGTTGCACTTTAAATTTTGATATGGARAARGAAGGAAAAATTTCAAAAATTGGGCCTGAAAATCCATACAATACTCCAGTATTTGCCATAAAGAAAAAGGACAGTAMTAAATGGAGAAAATTAGTAGATTTTAGAGAACTTAAGAGAACTCAGGATTTTTSRGAAGTTCAATTAGGA…
>AUT-400210321
AGAGAAGCTCTATTAGATACAGGAGCAGATGATACAGTATTAGAAGATATAAATTTRCCAGGAAAATGGAAACCAAAAATGATAGGGGGAATTGGAGGTTTTATCAARGTAAAGCAATATGATCAGRTACTTATAGAAATTTGTGGAAAAAAGGCTATAGGTACAGTGTTAGTAGGACCYACACCTGTCAACATAATTGGACGAAATATGTTGACTCAGATTGGTTGTACTTTAAATTTCGAGATGGAAGAGGAAGGAAAAATCTCAAAAATTGGGCCTGAAAATCCATACAATACTCCAATATTTGCTATAAAGAAAAAGGACAGCACCAAATGGAGGAAAWTAGTAGATTTCAGAGAGCTCAAAAGAACTCAGGAYTTTTGGGAAGTTCAATTAGGA…
>AUT-400210436
AAGGAAGCTCTATTAGATACAGGAGCAGATGATACAGTATTAGAAGAAATRGATTTGCCAGGGAGATGGAAACCAAAAATGATAGGGGGAATTGGAGGTTTTATCAAAGTAAGACAGTATGATCAAATACYTRTAGAAATCTGTGGRCATAAAGCTAYRGGTACAGTATTAGTAGGACCTACACCTGTCAACATAATTGGAAGAAATCTGTTGACTCAGCTTGGTTGCACTTTAAATTTTGAAATGGAAAAGGAAGGGAAAATTTCAAAAATTGGGCCTGAAAATCCATATAATACTCCAGTATTTGCCATAAAGAAAAAAGACAGTACTAAATGGAGAAAATTAGTAGATTTCAGAGAACTTAAGAAAACTCAAGACTTCTGGGAAGTTCAATTAGGA…
>AUT-400210720
AAGGAAGCTCTATTAGATACAGGAGCAGATGATACAGTACTAGAAGAAATGAATTTGCCAGGAAGATGGAAACCAAAAATGATAGGGGGAATTGGAGGTTTTATCAAAGTAAGACAGTATGATCAGATACTTGTAGAAATCTGTGGGCATAAAGCTATAGGTACAGTATTAGTAGGACCTACACCTGTCAACATAATTGGAAGAAATCTGTTGACTCAGATTGGTTGCACTTTAAATTTTGAAATGGAGAAGGAAGGAAAAATTTCAAAAATTGGGCCTGAAAATCCATATAATACTCCAGTATTTGCCATAAAGAAAAAAGATGGTACTAAATGGAGAAAATTAGTAGATTTCAGGGAACTTAAAAGAACTCAAGACTTCTGGGAAGTTCAATTAGGA…
>AUT-400210768
AAGGAAGCTCTATTAGATACAGGAGCAGATGATACAGTATTAGAAGAAATGAATTTGCCAGGAAAATGGAAACCAAAAATGATAGGGGGAATTGGAGGTTTTATCAAAGTAAGACAGTATGAGCAAATACCCATAGAAATTTGTGGACATARAGCTATAGGTACAGTATTAGTAGGACCTACACCMGTCAACATAATTGGAAGAAATCTGTTGACTCAGATTGGTTGCACTTTAAATTTTGAAATGGAAAAGGAAGGAAAAATTTCAAAAATTGGGCCAGAAAATCCATACAATACTCCAGTATTTGCCATAAAGAAAAAAGACAGTACTAAATGGAGAAAGTTAGTAGATTTCAGAGAACTTAARAGAACTCAAGACTTTTGGGAAGTTCAATTAGGA…
>AUT-400211680
AAGGAAGCTCTATTAGATACAGGAGCAGATGATACAGTATTAGAAGAAATGAATTTGCCAGGAAGATGGAAACCAAAAATGATAGGGGGAATTGGAGGTTTTATCAAAGTAAGACAGTATGATCAGGTACCCATAGAAATCTGTGGACATAAAGCTATAGGTACAGTATTAATAGGACCTACACCTGTCAACATAATTGGAAGAAATCTGTTGACTCAGCTTGGTTGCACTTTAAATTTTGWAATGNAAAAGGAAGGGAAAATTTCAAAAATTGGGCCTGAGAATCCATACAATACTCCAGTATTTGCCATAAAGAAAAAAGACAGTACTAAATGGAGAAAATTAGTAGATTTCAGAGAACTTAAGAGAACTCAAGACTTCTGGGAAGTTCAACTAGGA…
>AUT-400211681
AAGGAAGCTCTATTAGATACAGGAGCAGATGATACAGTATTAGAAGAAATGAATTTGCCAGGAARATGGAAACCAAAAATGATAGGGGGAATTGGAGGTTTTATCAAAGTAAGACAGTATGATCAGGTACCCATAGAAATCTGTGGACATAAAGCTATAGGTACAGTATTAATAGGACCTACACCTGTCAACATAATTGGAAGAAATCTGTTGACTCAGCTTGGTTGCACTTWAAATTTTGAWATGGAAAAGGAAGGRAAAATTTCAAAAATTGGGCCTGAGAATCCATACAATACTCCAGTATTTGCCATAAAGAAAAARGACAGTACTAAATGGAGAAAATTAGTAGATTTCAGAGAACTTAAGAGAACTCAAGACTTCTGGGAAGTTCAACTAGGA…
>AUT-400212361
AGAGARGCTCTATTAGATACAGGAGCAGATGATACAGTATTAGAAGAAATAAATTTGCCAGGAAAATGGAAACCAAAAATGATAGGGGGAATTGGAGGTTTTATCAAAGTAAGGCAATATGATCAGATACTTATAGAAATTTGTGGAAAAAAGGCTATAGGTACAGTATTAGTAGGACCTACACCTRTCAACATAATTGGACGAAATATGTTGACTCAGATTGGTTGTACTTTAAA-TTTGAGATGGAAGAGGAAGGAAAAATCTCAAAAATTGGGCCTGAAAATCCATACAATACTCCAGTATTTGCTATAAAGAAAAAGGACAGCACCAAATGGAGRAAATTAGTAGATTTCAGAGAGCTCAAAAGAACTCAGGACTTTTGGGAAGTTCAATTAGGA…
>AUT-400212383
AAGGAAGCTCTATTAGATACAGGAGCAGATGATACAGTATTAGAAGAAATGAATTTGCCAGGAAGATGGAGACCAAAAATGATAGGGGGAATTGGAGGTTTTATCAAAGTAAGACAGTATGATCAAATACCCATAGAAATCTGTGGAAATAAAGCTATAGGTACAGTATTAGTAGGACCTACACCTGTCAACATAATTGGAAGAAATCTGTTGACCCAGATTGGTTGCACTTTAAATTTTGAAATGGAAAAGGAAGGGAAAATTTCAAAAATTGGGCCTGAAAATCCATATAATACTCCAGTATTTGCCATAAAGAAAAAAGACAGTACTAAATGGAGAAAATTAGTAGATTTCAGAGAACTTAAGAGAACTCAAGACTTCTGGGAAGTTCAATTAGGA…
>AUT-400212384
AAGGAAGCTCTATTGGATACAGGAGCAGATGATACAGTATTAGAAGAAATGAGTTTACCAGGAAGATGGAAACCAAAAATGATAGGGGGAATTGGAGGTTTTATCAAAGTAAGACAATATGATCAGATACTTGTAGAAATCTGTGGACATAAAGCTATAGGTACAGTATTAGTAGGACCTACGCCTGTCAACATAATTGGAAGAAATCTGTTGACTCAGATTGGTTGCACTTTAAATTTTGAAATGGAAAAGGAAGGAAAAATTTCAAAAATTGGGCCTGAAAATCCATACAATACTCCAATATTTGCCATAAAGAAAAAAGACAGTACTAAATGGAGAAAATTAGTAGATTTCAGAGAACTTAAAAGAACTCAAGACTTCTGGGAAGTGCAATTAGGA…
>AUT-400212500
AAGGAAGCTCTATTAGATACAGGAGCAGATGATACAGTATTAGAAGAGATAGATTTACCAGGAAGGTGGAAACCAAAAATGATAGGGGGAATTGGAGGTTTTATCAAAGTAAGACAGTATGATCAGGTACCCATAGAAATCTGTGGACATAAAGCTATAGGTACAGTATTAGTAGGACCTACACCTGTCAATATAATTGGAAGAAATCTGTTAACTCAGCTGGGTTGCACTCTAAATTTTGAAATGGAAAAGGAAGGAAAAATTTCAAAAATTGGGCCTGAAAATCCATACAATACTCCAGTATTTGCCATAAAGAAAAAAGACAGTAGTAAATGGAGGAAATTAGTAGATTTCAGAGAACTTAAAAGAACTCAGGACTTCTGGGAAGTTCAATTAGGA…
>AUT-400212501
AAGGAAGCTCTATTGGATACAGGAGCAGATGATACAGTATTAGAAGAAATGAGTTTACCAGGAAGATGGAAACCAAAAATGATAGGGGGAATTGGAGGTTTTATCAAAGTAAGACAGTATGATCAGATACTTGTAGAAATCTGTGGACATAAAGCTATAGGTACAGTATTAGTAGGACCTACGCCTGTCAACATAATTGGAAGAAATCTGTTGACTCAGATTGGTTGCACTTTAAATTTTGAAATGGAAAAGGAAGGAAAAATTTCAAAAATTGGGCCTGAAAATCCATACAATACTCCAGTATTTGCCATAAAGAAAAAAGACAGTACTAAATGGAGAAAATTAGTAGATTTCAGAGAACTTAAAAGAACTCAAGACTTCTGGGAAGTGCAATTAGGA…
>AUT-400212610
AGAGAAGCTCTATTAGATACAGGAGCAGATGATACAGTATTAGAAGATATAAATTTGCCAGGAAAATGGAAACCAAAAATGATAGGGGGAATTGGAGGTTTTATCAAAGTAAGGCAATATGATCAGATACTTATAGAAATTTGTGGAAAAAAGGCTATAGGTACAGTATTAGTAGGACCTACACCTGTCAACATAATTGGACGAAATATGTTGACTCAGATTGGTTGTACTTTAAATTTCGAGATGGAAGAGGAAGGAAAAATCTCAAAAATTGGGCCTGAAAATCCATACAATACTCCAGTATTTGCTATAAAGAAAAAGGACAGCACCAAATGGAGGAAATTAKTAGATTTCAGGGAACTCAAAAGAACTCAGGATTTTTGGGAAGTTCAATTAGGA…
>AUT-400212747
AAGGAAGCTTTGTTAGATACAGGAGCAGATGATACAGTATTAGAAGAGATGAATTTGCCAGGAAAATGGAAACCAAAAATGATAGGGGGAATTGGAGGTTTTATCAAAGTCAGACAGTATGATCAGGTATCCCTAGAAATCTGTGGACATAAAGCTATAGGTACAGTATTAGTAGGACCTACACCTGTCAACATAATTGGAAGAAATCTGTTGACTCAGCTTGGTTGCACGTTAAATTTTGAAATGGAAAAGGAAGGAAAAATCTCAAAAATTGGGCCTGAAAATCCATACAATACTCCAGTATTTGCCATAAAGAAAAAAGACAGTACTAAATGGAGAAAATTAGTAGATTTCAGAGAGCTTAAAAGAACTCAAGACTTTTGGGAAGTTCAGCTAGGA…
>AUT-400212751
AAGGAAGCTCTATTAGATACAGGAGCAGATGATACAGTATTGGAAGAAATGAATTTGCCAGGAAGATGGAAACCAAAAATGATAGGGGGAATTGGAGGTTTTATCAAAGTAAGACAGTATGATCAGATACCCATAGAAATCTGTGGACACAAAGCTATAGGTACAGTRTTAATAGGACCTACACCTGTCAACATAATTGGAAGAAATCTGTTGACTCAGATTGGTTGCACTCTAAA-TTTGAAATGGAAAAGGAAGGGAAAATTTCAAAAATTGGGCCTGAAAACCCATATAATACTCCAATATTTGCCATAAAGAAAAAAGACAGTACTAAATGGAGAAAACTAGTAGATTTCAGGGAACTTAAGAGAACTCAAGACTTCTGGGAAGTTCAATTAGGA…
>AUT-400212849
AAGGAAGCTCTATTAGATACAGGAGCAGATGATACAGTATTCGAAGACATGACCTTGCCAGGAAGGTGGAAACCAAAAATGATAGGGGGAATTGGAGGTTTTATTAAAGTAAGACAGTATGATCAGATAACCATAGAAATCTGTGGACATAAAGCTACAGGTACAGTATTAATAGGACCCACACCTGTCAACATAATTGGAAGAAATCTGTTGACTCAGATTGGTTGCACTTTGAATTTTGATATGGAAAAGGAGGGGAAAATTTCAAAAATAGGGCCTGAAAATCCATACAATACTCCAGTATTTGCCATAAAGAAAAAGGATGGTACTAAATGGAGAAAATTAGTAGATTTCAGAGAACTTAAGAGAACTCAAGACTTCTGGGAGGTTCAACTAGGA…
>AUT-400213056
ATAGAAGCCCTATTAGACACAGGAGCAGATGATACAGTATTAGAAGAAATAAGTTTACCAGGAAAATGGAAACCAAAAATGATAGGGGGAATTGGAGGTTTTATCAAAGTAAGACAGTATGATCAAATACTTATAGAAATTGAAGGGAAAAAAGCTATAGGGACAGTATTAGTAGGACCTACACCTATCAACATAATTGGAAGAAATATGATGACTCAGATTGGTTGCACTTTAAATTTTGAAATGGAAAAGGAAGGAAAAATTTCAAAAATTGGGCCTGAAAATCCATACAATACTCCAATATTTGCCATAAAGAAAAAAGACAGTACTAAGTGGAGAAAATTGGTAGACTTCAGAGAGCTCAAAAGAACTCAAGACTTCTGGGAGGTCCAATTAGGA…
>AUT-400213336
ATAGAAGCTCTATTAGATACAGGAGCAGATGATACAGTGTTAGAAGAAATAGATTTACCAGGAAAATGGAAACCAAAAATGATAGGGGGAATTGGAGGTTTTATCAAAGTAAGACAATATGATCAGATACTTATAGAAATTTGTGGAAAAAAGGCCATAGGTACAGTATTAGTAGGACCTACACCTGTCAACATAATTGGACGAAATATGTTGACTCAGATTGGTTGTACTTTAAATTTTGACATGGAAAAGGAAGGAAAAATTTCAAAAATTGGGCCTGAAAATCCATACAATACTCCAATATTTGCCATAAAGAAAAAAGATAGTACTAAATGGAGAAAATTAGTAGATTTCAGAGAACTCAAGAGAACTCAAGACTTCTGGGAGGTCCAATTAGGA…
>AUT-400213589
AAGGAAGCTCTATTAGATACAGGAGCAGATAATACAGTATTAGAAGACATAAGTTTGCCAGGAAAATGGAAACCAAAAATGATAGGGGGAATTGGAGGTTTTATCAAAGTAAGACAGTATGATCAGATACCCGTAGAAATCTGTGGAAAGAAAGCTATAGGTACAATATTAGTAGGACCTACACCTGTCAACATAATTGGAAGAAATCTGTTGACTCAGATTGGTTGTACTCTAAATTTTGAAATGGAAAAGGAAGGGAAAATTTCAAAAATTGGGCCTGAAAATCCATATAATACTCCAGTATTTGCCATAAAGAAAAAAGACAGTACTAAATGGAGAAAATTAGTAGATTTTAGGGAACTTAAGAGAACTCAAGACTTCTGGGAAGTTCAATTAGGA…
>AUT-400213836
AAGGAAGCTCTATTAGATACAGGAGCAGATGATACAGTATTAGAAGAAATGAATTTGCCAGGAAGATGGAAACCAAAAATGATAGGGGGAATTGGAGGTTTTATCAAAGTAAGACAGTATGATCAAATACCCATAGAAATCTGTGAAAAGAAAACTATAGGTACAGTATTAGTAGGACCTACACCTGTCAACATAATTGGAAGAAATCTGTTGACTCAGCTTGGKTGCACTTYAAATTTTRAWATGKAAAAGGAAGGGAAAATTTCAARAWTTGGGCCTGAAAATCCATATAATACTCCARTATTTGCMATAAAGAAAAAAGACAGTACTAAATGGAGAAAATTAGTAGACTTCAGAGAACTTAAGAGAACTMAAGACTTCTGGGAAGTTCAATTAGGA…
>AUT-400213838
AAGGAAGCTCTATTAGATACAGGAGCAGATGATACAGTATTAGAAGAAATGAATTTGCCAGGAAGATGGAAACCAAAAATGATAGGGGGAATTGGAGGTTTTATCAAAGTAAGACAGTATGATCAGGTACCCATAGAAATCTGTGGAAATAAAGCTATAGGTACAGTATTAATAGGACCTACACCTGTCAACATAATTGGAAGAAATCTGTTGACTCAGATTGGTTGCACTTTAAATTTTGAAATGGAAAAGGAAGGAAAAATTTCAAAAATTGGGCCTGAAAATCCATACAATACTCCAGTATTTGCCATAAAGAAAAAGGACAGTACTAAATGGAGAAAATTAGTAGATTTCAGGGAACTTAAGAGAACTCAAGACTTCTGGGAAGTTCAATTAGGA…
>AUT-400214527
AAGGAAGCTCTATTAGATACAGGAGCAGATGATACAGTATTAGAAGAAATGAATTTGCCAGGAAAATGGAAGCCAAAAATGATAGGGGGAATTGGAGGTTTTATCAAAGTAAGACAGTATGATCAGATACCCATAGAAATCTGTGGGCATAAAACTATAGGTACAGTATTAGTAGGACCTACACCTGTCAACATAATTGGAAGGAATCTGTTGACTCAGCTTGGTTGCACTTTAAATTTTGAAATGGAAAAAGAAGGGAAAATTTCAAAAATTGGGCCTGAAAATCCATACAATACTCCAGTATTTGCCATAAAGAAAAAAGACAGTACTAAATGGAGAAAATTGGTAGATTTCAGAGAACTTAAGAGAACTCAAGACTTCTGGGAAGTTCAATTAGGA…
>AUT-400214616
AAGGAAGCTCTATTAGATACAGGAGCAGATGATACAGTATTAGAAGACATAAATTTGCCAGGAAAATGGAAACCAAAAATGATAGGGGGAATTGGAGGTTTTATCAAAGTAAAACAATATGATAATGTAGCCATGGAAATTTGTGGACACAAGGCTATAGGTACAGTATTAGTAGGGCCTACACCTGTTAACATAATTGGAAGAAATATGTTGACTCAGCTTGGGTGTACTTTAAATTTTGAAATGGAAAAAGAAGGAAAAATTTCAAAAATTGGGCCTGAGAACCCATACAATACTCCAATATTTGCCATAAAGAAAAAAGACAGTACTAAATGGAGGAAATTAGTAGATTTCAGAGAACTTAAAAGAACTCAGGATTTTTGGGAGGTTCAATTAGGA…
>AUT-400214927
AAGGAAGCTCTATTAGATACAGGAGCAGATGATACAGTATTAGAAGAAATGAGTTTGCCAGGAAGATGGAAACCAAAAATGATAGGGGGAATTGGAGGTTTTATCAAAGTAAAACAGTATGATCAGATACCAATAGAAATCTGTGGACATAAAGCTATAGGTACAGTATTAGTAGGACCTACACCTGTCAACATAATTGGGAGAAATCTGTTGACTCAGCTTGGATGCACTTTAAATTTTGAAATGGAAAAGGAAGGAAAAATTTCAAAGATTGGGCCTGAAAATCCATACAATACTCCAGTATTTGCCATAAAGAAAAAAGACAGTACTAAATGGAGAAAATTAGTAGATTTCAGAGAACTTAAGAGAACTCAAGACTTCTGGGAAGTTCAATTGGGA…
>AUT-400215118
ATAGAAGCCCTACTAGATACAGGAGCAGATGATACAGTATTAGAAGAAATAAATTTACCAGGAAAATGGAAACCAAAAATAATAGGGGGAATTGGAGGTTTTATCAAAGTAAGACAGTATGATCAAATACTTATAGAAATTTGTGGAAAAAGGGCCATAGGTACAGTATTAGTAGGACCTACACCTGTCAACATAATTGGACGAAATATGTTGACTCAGATTGGTTGTACTTTAAATTTTGACATGGAAAAGGAAGGAAAAATTTCAAAAATTGGGCCTGAAAATCCATACAATACTCCAGTATTTGCCATAAAGAAAAAAGATAGTACTAAATGGAGAAAATTAGTAGATTTCAGAGAACTCAAGAGAACTCAAGACTTCTGGGAGGTCCAATTAGGA…
>AUT-400215570
AAGGAAGCTCTGTTAGATACAGGAGCAGATGATACAGTATTAGAAGAAATGAATTTGCCAGGAAAATGGAAACCAAAAATGATAGGGGGAATTGGAGGTTTTATCAAAGTAAGACAGTATGATCAAATACCCATAGAAATCTGTGAAAAGAAAACTATAGGTACAGTATTAGTAGGACCTACACCTGTCAACATAATTGGAAGAAATCTGTTGACTCAGCTTGGGTGCACTTTAAA-TTTGAATTGGAAAAGGAAGGGAAAATTTCAAGAATTGGGCCTGAAAATCCATATAATACTCCAGTATTTGCCATAAAGAAAAAAGACAGTACTAAATGGAGAAAATTAGTAGATTTCAGAGAACTTAAGAAAACTCAAGACTTCTGGGAAGTTCAATTAGGA…
>AUT-400215945
AAGGAAGCTCTATTAGATACAGGAGCAGATGATACAGTATTAGAAGAAATGAATTACCCAGGGAGATGGAAACCAAAAATGATAGGGGGAATTGGAGGTTTTATCSAAGTAAGACAGTATGATCAGATACCCATAGAAATCWGTGGACATAAAGCTATAGGTACAGTATTAGTAGGACCTACCCCTGTCAACATAATTGGAAGAAATCTGTTGACTCAGATTGGGTGCACTTTAAATTTTGAAATGGAAAAGGAAGGAAAAATTTCAAARATTGGGCCTGAAAATCCATACAATACTCCAGTATTTGCCATAAAGAAAAAAGACAGTACTAAATGGAGAAAGTTAGTAGATTTCAGAGAACTTAAGAGAACTCAAGACTTCTGGGAAGTTCAATTAGGA…
>AUT-400215955
AAGGAAGCTCTATTAGATACAGGAGCAGATAATACAGTATTAGAAGACGTGAGTTTGCCAGGAAGATGGAAACCAAAAATGATAGGGGGAATTGGAGGTTTTATCAAAGTAAAAGAGTATGATCAAGTACCCGTAGAAATCTGTGGGCATAAAGTTATAGGTACAGTGTTAATAGGACCTACACCTGTCAACATAATTGGAAGAGATCTGTTGACTCAGATTGGTTGCACTTTAAATTTTGAAATGGAGAAGGAAGGGAAAATTTCAAAAATTGGGCCTGAAAATCCATATAATACTCCAGTATTTGCCATAAAGAAAAAGGACAGTACTAAATGGAGAAAATTAGTAGATTTCAGAGAACTTAAGAGAACTCAAGACTTTTGGGAAGTTCAATTAGGA…
>AUT-400215999
AAGGAAGCTCTATTAGATACAGGAGCAGATGATACAGTATTAGAAGAACTGAATTTGCCAGGAAAATGGAAACCAAAAATGATAGGGGGAATTGGAGGTTTTATCAAAGTAAAACAGTATGATCAGATACCCATAGAAATTTGTGGACATAAAGCAATAGGTACAGTATTAGTAGGACCTACACCTGTCAACATAATTGGAAGAAATCTGTTGACTCAGMTTGGCTGCACTTTAAATTTTGAAATGGAAAAGGAAGGAAAAATTTCAAAAATTGGGCCTGAAAACCCATACAATACTCCAGTATTTGCCATAAAGAAAAAAGACAGTACTAAATGGAGAAAATTAGTAGATTTCAGAGAACTTAAGAGAACTCAAGACTTCTGGGAAGTTCAATTAGGA…
>AUT-400216167
AAGGAAGCTCTATTAGATACAGGAGCAGATGATACAGTATTAGAAGAAATGGATTTGCCAGGAAGATGGAGGCCAAAAATGATAGGGGGAATTGGAGGTTTTATCAAAGTAAGACAGTATGATCAAATACCCATAGACATCTGTGGACATAAAGCTATAGGTACAGTATTAATAGGACCTACACCTGTCAACATAATTGGAAGAAACCTGTTGACTCAGATTGGTTGTACTTTAAATTTCGAAATGGAAAAGGAAGGAAAAATTTCAAGAATTGGGCCTGAAAATCCATACAATACTCCAGTATTTGCCATAAAGAAAAAAGACAGTACTAAATGGAGAAAATTAGTAGATTTCAGAGAACTTAAAAGAACACAAGACTTCTGGGAAGTTCAATTAGGC…
>AUT-400216170
AAGGAAGCTCTATTAGATACAGGAGCAGATGATACAGTATTAGAAGAAATGAATTTGCCAGGAAAATGGAGGCCAAAAATGATAGGGGGAATTGGAGGTTTTATCAAAGTAAGACAATATGATCAAGTACACATAGAAATCTGTGGAAGTAAAGTTATAGGTACAGTATTAATAGGACCCACACCTGTCAACATAATTGGAAGAAATCTGTTGACTCAGCTTGGTTGCACTTTAAATTTTGAAATGGAAAAGGAAGGGAAAATTTCAAAAATTGGGCCTGAGAATCCATATAATACTCCAGTGTTTGCTATAAAGAAAAAAGACAGTACTAAATGGAGAAAATTAGTAGATTTCAGAGAACTTAAGAGAACTCAAGACTTCTGGGAAGTTCAATTAGGA…
>AUT-400216172
AAGGAAGCTCTATTAGATACAGGAGCAGATGATACAGTATTAGAAGACATGCATTTGCCAGGGAGATGGAAGCCAAAAATGATAGGGGGAATTGGAGGTTTTATCAAAGTGAGACAGTATGATCAGATACCCATAGAAATCTGTGGACATAAAGCTATAGGCACAGTATTAATAGGACCTACTCCCGTCAACATAATTGGAAGAAATCTGTTGACTCAGCTTGGTTGCACTTTAAATTTTGAAATGGAAAAGGAAGGAAAAATTTCAAGAATTGGGCCTGAAAATCCATACAATACTCCAGTATTTGCCATAAAGAAAAAAGACAGTACTAAATGGAGAAAATTAGTAGATTTCAGAGAACTTAAAAGAACTCAAGACTTCTGGGAAATTCAATTAGGA…
>AUT-400216401
AAGGAAGCTCTATTAGATACAGGAGCAGATGATACAGTATTAGAAGAACTGCATTTACCAGGAAAATGGAAACCAAGAATGATAGGGGGAATTGGAGGTTTTATCAAAGTAAAACAGTATGATCAGATAACTATAGAAATCTGTGGACATAAAGCTATAGGTACAGTGTTAGTAGGACCTACACCTGTCAACATAATTGGAAGAAATCTGTTGACCCAGATTGGCTGCACTTTAAATTTTGAAATGGAAAAGGAAGGAAAAATTTCAARAATTGGGCCTGAAAATCCATACAATACCCCAGTATTTGCCATAAAGAAAAAAGATAGTACTAAATGGAGAAAATTAGTAGATTTTAGAGAACTTAAGAGAACTCAGGACTTCTGGGAAGTTCAATTAGGA…
>AUT-400217116
AAAGAAGCTCTATTAGATACAGGAGCAGATGATACAGTATTAGAAGACATAAATTTGCCAGGAAAATGGAAACCAAAAATGATAGGGGGAATTGGAGGTTTTATCAAGGTAAGACAGTATGATCAGATACTTATAGAAATTTATGGAAAAAAGGCTATAGGTACGGTATTAGTAGGACCTACCCCTGTCAACATAATTGGAAGAAATATGTTGACTCAGCTTGGTTGTACTTTAAATTTTGAGATGGAAAAGGAAGGAAAAATTTCAAAAATTGGGCCTGAAAATCCATACAATACTCCAGTATTTGCTATAAAGAAAAAGGACAGCACTAAGTGGAGGAAATTAGTAGATTTCAGGGAGCTCAAAAGAACTCAGGACTTTTGGGAAGTTCAATTAGGA…
>AUT-400217225
AAGGAAGCTCTATTAGATACAGGAGCAGATGATACAGTATTAGAAGAAATGAGTTTACCAGGAAGATGGAAACCAAAGATGATAGGGGGAATTGGAGGTTTTATCAAAGTAAGACAATATGATCAAATACCCCTAGAAATCTGTGGACATAAAGCTACAGGTACAGTATTAATAGGACCTACGCCTGTCAACATAATTGGAAGAAATCTGTTGACTCAGATTGGCTGCACTTTAAATTTTGAAATGGAAAAGGAAGGGAAAATCTCAAAGATTGGGCCTGAAAATCCATACAATACTCCAGTATTTGCCATAAAAAAGAAAGACAGTACTAAATGGAGAAAATTAGTAGATTTCAGAGAACTCAAGAGAACTCAAGACTTCTGGGAAGTTCAATTAGGA…
>AUT-400217510
AARGAAGCTCTAYTAGATACAGGAGCAGATGATACAGTATTAGAAGAAATRAATTTGCCAGGAAGATGGAAACCAAAAATGATAGGGGGAATTGGAGGTTTTATCAAAGTGARRCAGTATGATCAAATACTCRTAGAAATCTGTGGRCATAARGCTATAGGTACAGTRTTARTAGGACCTACACCTGTCAACATAATTGGAAGAAATCTGTTGACTCAGATTGGTTGCACTTTAAATTTTKAWATGGAAAAGGRAGGRAAAWTTTYAAAAATTGGGCCTGARAATYCATATAATACTCCAGTATTTGCCATAAAGAAAAAAGACAGTACTAAATGGAGAAAATTAGTAGATTTYAGAGAACTTAAGAGAACTCAAGACTTCTGGGAAGTTCAATTAGGA…
>AUT-400217805
AAAGAAGCTCTATTAGATACAGGAGCAGATGATACAGTATTAGAAGATATAAATTTGCCAGGAAAATGGAAACCAAAAATGATAGGGGGAATTGGAGGTTTTATCAAAGTAAGACAATATGATCAGATACTTATAGAAATTTGTGGAAAAAAGGCTATAGGTACAGTATTAGTAGGACCWACACCTGTCAACATAATTGGACGAAATATGTTGACTCAGATTGGTTGTACTTTAAATTTTGAGATGGAAGAGGAAGGRAAAATCTCAAAAATAGGTCCTGAAAATCCATACAATACTCCAGTATTTGCTATAAAGAAAAAGGACAGCACCAAATGGAGAAAATTAGTAGATTTCAGAGAGCTCAAAAGAACTCAGGACTTTTGGGAAGTTCAATTAGGA…
>AUT-400218042
ATAGAAGCCCTATTAGACACAGGAGCAGATGATACAGTATTAGAGGAAATAGATTTACCAGGAAAATGGAAACCAAAAATGATAGGGGGAATTGGAGGTTTTATCAAAGTAAGACARTATGATCAGATACTTATAGAAATTTGTGGAAAAAGGGCCATAGGTACAGTATTAGTAGGACCTACACCTGTCAACATAATTGGAAGAAATATGTTGACTCAGATTGGTTGTACTTTAAATTTTGAAATGGAAAAGGAGGGGAAAATTTCAAAAATTGGGCCTGAAAATCCATACAATACTCCAGTTTTTGCCATAAAGAAAAAAGATAGTACTAAATGGAGAAAATTAGTAGATTTCAGGGAACTCAAGAGAACTCAGGACTTCTGGGAGGTCCAATTAGGA…
>AUT-400218468
ATAGAAGCCTTATTAGACACAGGAGCAGATGACACAGTATTAGAAGACATAAATTTACCAGGAAAATGGAAACCAAAAATGATAGGGGGAATTGGAGGTTTTATCAAAGTAAGACAGTATGATSAAATACTTATAGAAATTAGTGGAAAAAAGGCTATAGGGACAGTATTAGTAGGACCTACACCTATTAACATAATTGGGAGAAATATGTTAACTCAGATTGGTTGTACTTTAAACTTTGACATGGAAAAGGAAGGAAAAATTTCAAGAATTGGGCCTGAAAACCCATATAACACTCCAATATTTGCCATAAAGAAAAAAGACAGTACTAAATGGAGAAAATTAGTAGATTTCAGAGARCTTAAAAGAACTCAAGACTTCTGGGAGGTCCAATTAGGA…
>AUT-400219059
AAAGAAGCTCTATTAGATACAGGAGCAGATGATACAGTATTAGAAGACATAGATTTGCCAGGAAAATGGAAACCAAAAATGATAGGGGGAATTGGAGGTTTTATTAAGGTAAGACAGTATGATCAAATACTTATAGAAATTTGTGGAAAAAAGGCTATAGGTACGGTATTAGTAGGACCTACCCCTGTCAACATAATTGGAAGAAATATGTTGACTCAGCTTGGTTGTACTTTAAATTTTGAGATGGAAAAGGAAGGAAAAATTTCAAAAATAGGGCCTGAAAATCCATACAATACTCCAGTATTTGCTATAAAGAAAAAGGACAGCACTAAGTGGAGGAAATTAGTAGATTTCAGGGAGCTCAAGAGAACTCAGGACTTTTGGGAAGTTCAATTAGGA…
>AUT-400219063
RTAGAAGCTCTATTAGACACAGGAGCAGATGATACAGTATTAGAAGAAATAGATTTACCAGGAAAATGGAGACCAAAAATGATAGGGGGAATTGGAGGTTTTATCAAAGTAAGACAATATGATCAKATATCTATAGAAATTTGTGGAAAAAGGGCCATAGGTACAGTATTAGTAGGACCTACACCTGTCAACATAATTGGACGAAAYATGTTGACTCAGATTGGTTGTACTYTAAATTTTGAGATGGAAAAGGAAGGAAAAATTTCAAAAATTGGGCCTGAAAATCCATACAATACTCCAATATTTGCCATAAAGAAAAAAGATAGTACTAAATGGAGAAAATTAGTAGATTTCAGAGAACTTAAGAGAACTCAAGAYTTCTGGGAGGTCCAATTAGGG…
>AUT-400220078
AAGGAAGCTCTATTGGATACAGGAGCAGATGATACAGTATTAGAAGACATGAATTTGCCAGGAAGATGGAAACCAAAAATGATAGGGGGAATTGGAGGTTTTATCAAAGTAAGACAGTATGATCAGATACCTGTAGAAATCTGTGGACATAAAGCTATAGGTACAGTRTTAGTAGGACCTACRCCTGTCAACATAATTGGAAGAAATCTGTTGACTCAAATTGGTTGCACTTTAAATTTTGAAATGGAAAAGGAAGGAAAAATTTCAAAAATTGGGCCTGAAAATCCATACAATACTCCAATATTTGCCATAAAGAAAAAAGACAGTACTAAATGGAGAAAATTAGTAGATTTCAGAGAACTTAAGAGAACTCAAGATTTCTGGGAAGTTCAATTAGGA…
>AUT-400221185
AAGGAAGCTCTATTAGATACAGGAGCAGATGATACAGTGTTAGAAGAGATGAATTTGCCAGGAAGGTGGAAACCAAAAATGATAGGGGGAATTGGAGGTTTTATCAAAGTAAGACAATATGATCAGGTACTCATAGACATCTGTGGGCATAAAGCTGTAGGTACAGTCTTAGTAGGACCTACACCTGTCAACATAATTGGAAGAAATCTGTTGACTCAGCTTGGTTGCACTTTAAATTTTGAAATGGAAAAGGAAGGGAAAATTTCAAAAATTGGGCCTGAAAATCCATACAATACTCCAGTATTTGCCATAAAGAAAAAAGACAGTACTAAATGGAGAAAATTAGTAGATTTCAGGGAACTTAAGAGAACTCAAGACTTTTGGGAAGTTCAATTAGGA…
>AUT-400221813
ATAGAAGCCCTATTAGACACAGGAGCAGATGATACAGTATTAGAAGAAATAAATTTACCAGGAAGATGGAAACCAAAAATGATAGGGGGAATTGGAGGTTTTATCAAAGTAAGACAATATGATCAGATACCTATAGAAATTTGTGGAAAAAAGGCCATAGGTACAGTGTTAGTAGGACCTACACCTGTCAACATAATTGGACGAAATATGTTGACCCAGATTGGTTGTACTTTAAATTTTGAAATGGAAAAGGAAGGAAAAATTTCAAAAATTGGGCCTGAAAATCCATACAATACTCCAGTATTTGCCATAAAGAAAAAGGATAGTACTAAATGGAGAAAATTAGTAGATTTCAGAGAACTCAAGAGAACTCAAGACTTCTGGGAGGTCCAATTAGGA…
>AUT-400221814
AAGGAAGCTCTATTAGATACAGGAGCAGATGATACAGTATTAGAAGAAATGAATTTGCCAGGAAGATGGAAACCAAAAATGATAGGGGGAATTGGAGGTTTTATCAAAGTAAGACAATATGATCAAATACTTATAGAAATCTGTGGACATAAAGCTATAGGTACAGTATTAGTAGGACCTACACCTGTCAACATAATTGGAAGAAATCTGTTGACTCAGCTTGGTTGCACTTTAAATTTTGAAATGGAAAAGGAAGGGAAAATTTCAAAAATTGGGCCTGAAAATCCATATAATACTCCAGTATTTGCCATAAAGAAAAAAGACAGTACTAAATGGAGAAAATTAGTAGATTTCAGAGAACTTAAGAAGACTCAAGACTTCTGGGAAGTTCAATTAGGA…
>AUT-400222295
AGAGAAGCTCTATTAGATACAGGAGCAGATGATACAGTATTAGAAGACATAGATTTGCCAGGAAAATGGAAACCAAAAATGATAGGGGGAATTGGAGGTTTTATCAARGTAAGACARTATGATCAGATACTTATAGAAATTTGTGGAAAAAAGGCTATAGGTACAGTATTAGTAGGACCTACCCCTGTCAACATAATTGGAAGAAATATGTTGACTCAGCTTGGTTGTACTTTAAATTTTGAAATGGAAAAGGAAGGAAAAATTTCAAAAATTGGGCCTGAAAATCCATACAATACTCCAGTATTTGTTATAAAGAAAAAGGACAGCACTAAGTGGAGGAAATTAGTAGATTTCAGGGAGCTCAAAAGAACTCAGGACTTTTGGGAAGTTCAATTAGGA…
>AUT-400222297
ATAGAAGCCCTATTAGACACAGGAGCAGATGATACAGTATTAGAAGAAATAAGTTTACCAGGAGRATGGAAACCAAAAATGATAGGGGGAATTGGAGGTTTTATCAAAGTAAGACAGTATGATCAAATACTTATAGAAATTTGYGGGAGAAAAGCCAGAGGTACGGTATTAGTAGGACCTACACCTGTCAACATAATTGGACGAAATATGTTGACTCAGATTGGTTGTACTTTAAATTTTGAGATGGAAAAGGAAGGAAAAATTTCAAAAATTGGGCCTGAAAATCCATACAATACTCCARTATTTGCCATAAAGAAAAAAGATAGTACTAAATGGAGAAAATTAGTAGATTTCAGAGAACTCAAGAGGACTCAAGACTTCTGGGAGGTCCAATTAGGA…
>AUT-400222332
ATAGAAGCCTTATTAGACACAGGAGCAGATGACACAGTATTAGAAGACATAAATTTACCAGGAAAATGGAAACCAAAAATGATAGGGGGAATTGGAGGTTTTATCAAAGTAAGACAGTATGATCAAATACTTATAGAAATTGGTGGAAAAAAGGCTATAGGGACAGTATTAGTAGGACCTACACCTATTAACATAATTGGGAGAAATATGTTAACTCAGATTGGTTGTACTTTAAAYTTTGACATGGAAAA--AAGGAAAAATTTCAAGAATTGGGCCTGAAAACCCATATAACACTCCAATATTCGCCATAAAGAAAAAAGACAGTACTAAATGGAGAAAATTAGTAGATTTCAGAGAGCTTAAAAGAACTCAAGACTTCTGGGAGGTCCAACTAGGA…
>AUT-400222612
ATAGAAGCCCTATTGGACACAGGGGCAGATGATACAGTATTAGAAGACATAAATTTACCAGGAAAATGGAAGCCAAAAATGATAGGGGGAATTGGAGGTTTTATCAAAGTAAGACAATATGATCAGATACTTATGGAAATTTGTGGAAAAAAGGCTATAGGTACAGTATTAGTAGGACCTACACCTGTCAACATAATTGGACGAAACATGTTGACTCAGATTGGTTGTACTTTAAATTTTGAAATGGAAAAGGAAGGAAAGATTTCAAAAATTGGGCCTGAGAATCCATACAATACTCCAATATTTGCCATAAAGAAAAAAGATAGTACTAAATGGAGAAAATTAGTAGATTTCAGAGAACTCAAGAGRACTCAAGACTTCTGTGAGGTCCAATTAGGA…
>AUT-400223150
AAGGAAGCTCTATTAGATACAGGAGCAGATGACACAGTATTAGAAGAAATAAATTTGCCAGGAARATGGAAACCAAAAATGATAGGGGGAATTGGAGGTTTTATCAAAGTAAGACAGTATGATCAGGTAACCATAGAAATCAGTGGACATAAAGCTATAGGTACAGTGTTAGTAGGACCTACACCTGTCAACATAATTGGAAGAAATYTGTTGACTCAGCTTGGGTGCACTTTAAATTTTGAAATGGARAAGGAAGGGAAAATTTCAAAAATTGGGCCTGAAAATCCATACAATACTCCAGTATTTGCCATAAAGAAAAAAGACAGTACTAAATGGAGAAAATTAGTAGATTTYAGRGAACTTAARAGAACTCAAGACTTCTGGGAAGTTCAGTTAGGA…
>AUT-400223469
AGGGAAGCTCTATTAGATACAGGAGCAGATGATACAGTATTAGAAGAAATGACTTTGCCAGGAAGATGGAAACCAAAAATGATAGGGGGAATTGGAGGTTTTATCAAAGTAAGACAGTATGATCAGATGCCCATAGAAATCTGTGGGCAAAAAGTTATAGGTACAGTATTAATAGGACCTACACCTGTCAACATAATTGGAAGAAATCTGTTGACTCAACTTGGTTGCACTTTAAATTTTGAAATGGAGAAGGAAGGAAAAATTTCAAAAATTGGACCTGAAAATCCATACAATACTCCAGTATTTGCAATAAAGAAAAAGGATAGTACTAAATGGAGAAAATTAGTAGATTTCAGAGAACTTAAAAGAACTCAAGACTTTTGGGAAGTTCAATTAGGA…
>AUT-400223667
AAGGAAGCTCTATTAGATACAGGAGCAGATGATACAGTGGTAGAAGAAATGAATTTGCCAGGAAAATGGAAACCAAAAATGATAGGGGGAATTGGAGGTTTCATCAAAGTAAGACAGTATGATCAAATAACTGTAGAAATCTGTGGACATAAAGCTGTAGGTACAGTTTTAGTAGGACCTACTCCTGTCAACATAATTGGAAGAAATCTGTTGACTCAGCTTGGCTGTACTTTAAATTT-GAAATGGAAAAGGAAGGAAAGATTTCAAAAATTGGACCTGAAAATCCATACAATACTCCAATATTTGCCATAAAGAAAAAAGACGGTACTAAGTGGAGAAAATTAGTAGATTTCAGAGAACTTAAGAGAACTCAAGACTTCTGGGAAGTTCAATTAGGA…
>AUT-400224186
ATAGAAGCCCTATWAGACACRGGAGCAGATGAWACAGTRTTAGAAGAAAWAAATTTACCAGGAAAATGRAAACCAAAAATGATAGGGGRAWWTGGAGKTTTTWTCAAAGTWAGGCAGTATGATCAAAWACTWATAGAAAWTTKTGGAAAAAAGGSCAWTKGTACGGKATTAGTAGGACCTACACCTATYAACATAATTKGACGAAATATGTTGASTCASAWTGGKTGTACTTTAAATTTTRAGATGGAAAAGGAAGGRAAAAWTTYAARAATTGGGCCTGAAAATCCMTACAATACTCCAGTATTTGCCATAAAGAAAAAGGATAGTACTAAATGGAGAAAATTAGTAGATTTCAGAGAACTCAAGAGAACTCAAGACTTCTGGGAGGTCCAATTAGGA…
>AUT-400224411
AAGGAAGCTCTATTAGATACAGGAGCAGATGATACAGTATTAGAAGAAATGRATTTGCCAGGAAGATGGAAACCAAAAATGATAGGGGGAATTGGAGGTTTTATCAAAGTAAGACAGTATGATGAAGTAACCATGGACATYTGTGGACATAAAGCTGTAGGTACAGTATTAATAGGACCTACACCTGTCAACATAATTGGAAGAAATYTGTTGACTCAGCTTGGTTGCACTTTAAATTTTGAAATGGAAAAGGAAGGGAAAATTTCAAAAATTGGGCCTGARAATCCATATAATACTCCAGTATTTGCCATAAAGAAAAAAGACAGTACTAAATGGAGAAAATTAGTAGATTTCAGAGAGCTTAAGAGAACTCAAGACTTCTGGGAAGTTCAATTAGGA…
>AUT-400225231
AAGGAAGCTCTATTAGATACAGGAGCAGATGATACAGTATTAGAAGAAATGAGTTTGCCAGGAAGATGGAAACCAAAAATGATAGGGGGAATTGGAGGTTTTATCAAAGTAAGACAGTATGATCAGATACCCATAGAAATCTGTGGACATAAAGCTATAGGTACAGTATTAATAGGACCTACACCTGTCAACATAATTGGAAGAAATCTGTTGACTCAGCTTGGTTGCACCTTAAATTTTGAAATGGAAAAGGAAGGAAAGATTTCAAAAATTGGGCCTGAAAATCCATACAATACTCCAGTATTTGCCATAAAGAAAAAAGACAGTACTAAATGGAGAAAATTAGTAGATTTCAGAGAACTTAAGAAAACTCAAGATTTCTGGGAAGTTCAGTTAGGA…
>AUT-400225610
AAGGAAGCTCTATTAGATACAGGAGCAGATGATACAGTAGTAGAAGAAATGTATTTGCCAGGAAGATGGAAACCAAAAATGATAGGGGGAATTGGAGGTTTTATCAAAGTAAGACAGTATGATCAGGTACCCCTTGAAATCTGTGGGCAAAAGGCTATAGGTACAGTATTAGTAGGACCTACACCTGTCAACATAATTGGAAGAAATCTGTTGACTCAGATTGGTTGCACTTTAAACTTTGAAATGGAAAAGGAAGGGAAAATTTCAAAAATTGGGCCTGAAAATCCATACAATACTCCAGTATTTGCCATAAAGAAAAAAGACAGTACTAAATGGAGAAAATTAGTAGATTTCAGAGAACTTAAGAGAACTCAAGAYTTCTGGGAAGTTCAATTAGGA…
>AUT-400225754
AAGGAAGCTCTATTAGATACAGGAGCAGATGATACAGTATTAGAAGACATGAGTTTGCCAGGAAGATGGAAACCAAAAATGATAGGGGGAATTGGAGGTTTTATCAAAGTAAGACAGTATGATCAGATACCCATAGAAATCTGTGGACATAAAGCTATAGGTACAGTATTAGTAGGACCTACCCCTGTCAACATAATTGGAAGAAATCTGTTGACTCAAATTGGTTGCACTTTAAATTTTGAAATGGAAAAGGAAGGGAAAATTTCAAAAATTGGGCCTGAAAATCCATACAATACTCCAGTATTTGCCATAAAGAAAAAGGACAGTACTAAATGGAGAAAATTAGTAGATTTCAGAGAACTTAAGAGAACTCAAGACTTCTGGGAAGTTCAATTAGGA…
>AUT-400225755
AAAGAAGCTCTATTAGATACAGGAGCAGATGATACAGTATTAGAAGACATAAATTTGCCAGGAAAATGGAAGCCAAAAATGATAGGGGGAATTGGAGGTTTTATCAAAGTAAGGCAATATGATCAGATACTTATAGAAATTTGTGGAAAAAAGGCTATAGGTACAGTGTTAGTAGGACCAACACCTGTCAACATAATTGGACGAAATATGTTGACTCAGATTGGTTGTACTTTAAA-TTTGAGATGGAAGAGGAAGGAAAAATCTCAAAAATTGGGCCTGAAAATCCATATAATACTCCAATATTTGCTATAAAGAAAAAGGATGGTACCAAATGGAGAAAATTAGTAGATTTCAGAGAACTCAAAAGAACTCAGGACTTTTGGGAAGTTCAATTAGGA…
>AUT-400225760
ATAGAAGCCCTACTAGACACAGGAGCAGATGATACAGTATTAGAACAAATAAATTTACCAGGAAAATGGAAACCAAGAATGATAGGGGGAATTGGAGGATTTATCAAAGTAAAACAGTATGATCAAATAGCTATAGAAATTGAGGGGAAAAAGGCTATAGGGACAGTATTAGTAGGACCTACACCTATCAACATAATTGGAAGAAATATGTTGACTCAGATTGGTTGTACTTTAAATTTTGAAATGGAAAAGGAAGGGAAAATTTCAAAAATTGGGCCTGAAAATCCATACAACACTCCAATATTTGCCATAAAGAAAAAAGACAGTACTAAATGGAGAAAATTGGTAGATTTCAGAGAGCTCAAGAGAACTCAAGACTTTTGGGAGGTCCAATTAGGA…
>AUT-400226522
AAGGAAGCTCTATTAGATACAGGAGCAGATGATACAGTATTAGAAGACATGAGTTTGCCAGGAAGATGGAAACCAAAAATGATAGGGGGAATTGGAGGTTTTATCAAAGTAAGACAGTATGATCAGATACAAATAGAAATTTGTGGAAAAAAGGCTATAGGTACAGTATTAATAGGACCTACACCTGTCAACATAATTGGAAGAAATCTGTTGACTCAGATTGGTTGYACTTTAAATTTTGAAATGGAAAAGGAAGGGAAAATTTCAAAAATTGGGCCTGAAAATCCATATAATACTCCAGTATTTGCCATAAAGAAAAAAGACAGTACTAAATGGAGAAAATTAGTAGACTTCAGAGAACTTAAGAGAACTCAAGACTTCTGGGAAGTCCAATTAGGA…
>AUT-400227060
AAAGAAGCACTATTAGATACAGGAGCAGATGATACAGTATTAGAAGATATAAATTTGCCAGGAAAATGGAAACCAAAAATGATAGGGGGAATTGGAGGTTTTATCAAAGTAAGGCAATATGATCAGATACTTATAGAAATTTGTGGAAAAAAGGCTATAGGTACAGTATTAGTAGGACCTACACCTGTCAACATAATTGGACGGAATATGTTGACTCAGATTGGTTGTACTTTAAATTTTGAGATGGAAGAGGAAGGAAAAATCTCAAAAATTGGGCCTGAAAATCCATACAATACTCCAGTATTTGCTATAAAGAAAAAGGACAGCACCAAATGGAGAAAATTAGTAGATTTCAGAGAGCTCAAAAGAACTCAGGACTTTTGGGAAGTTCAATTAGGC…
>AUT-400227293
AAAGAAGCTCTATTAGATACAGGAGCAGATGATACAGTATTAGAAGATATAAATTTGCCAGGAAAATGGAAACCAAAAATGATAGGGGGAATTGGAGGTTTTATCAAAGTAAGGCAATATGATCAGATACTTATAGAAATTTGTGGAAAAAAGGCTATAGGTACWGTATTAGTAGGACCTACACCTATCAACATAATTGGACGAAATATGTTGACTCAGATTGGTTGTACTTTAAATTTTGAGATGGAAAAGGAAGGAAAAATTTCAAAAATTGGGCCTGAAAATCCATACAATACCCCAGTATTTGCTATAAAGAAAAAGGACAGYACCAAATGGAGGAAATTAGTGGATTTCAGAGAGCTCAAAAGAACTCAGGACTTTTGGGAAGTTCAATTAGGA…
>AUT-400227781
AGAGAAGCTCTATTAGATACAGGAGCAGATGATACAGTATTAGAAGATATAAATTTGCCAGGAAAATGGAAACCAAAAATGATAGGGGGAATTGGAGGTTTTATCAAAGTAAAGCAATATGATCAGATACTTATAGAAATCTGTGGAAAAAGGGCTATAGGTACAGTGTTAGTAGGACCTACACCTGTCAACATAATTGGACGAAATATGTTGACTCAGATTGGTTGTACTTTAAATTTTGAGATGGAAGAGGAAGGAAAAATCTCAAAAATTGGGCCTGAAAATCCATACAATACTCCAATATTTGCTATAAAGAAAAAGGATGGCACTAAGTGGAGGAAATTAGTAGATTTCAGAGAGCTCAAAAGAACTCAAGACTTTTGGGAAGTTCAATTAGGA…
>AUT-400227782
AAGGAAGCTCTATTAGATACAGGAGCAGATGATACAGTATTAGAAGAAATGAATTTGCCAGGAAAATGGAAACCAAAAATGATAGGGGGAATTGGAGGTTTTATCAAAGTAAGACAGTATGATCAGATACCCATAGARATCTGTGGGCATAAAGCTATAGGTACAGTTTTAGTAGGACCTACACCTGCCAACATAATTGGAAGAAATCTGTTGACTCAGATTGGATGCACTTTAAATTTTGAAATGGAAAAGGAAGGAAAAATTTCAAAAATTGGGCCTGAAAATCCATACAATACTCCAGTATTTGCCATAAAGAAAAAAGACAGTACTAAATGGAGAAAATTAGTAGATTTCAGAGAACTTAAGAAAACTCAAGACTTCTGGGAAGTTCAATTAGGA…
>AUT-400228335
AAGGAAGCTCTATTAGATACAGGAGCAGATGATACAGTATTAGAAGAAATAAATYTGCCAGGAARATGGAAACCAAAAATGATAGGGGGAATTGGAGGTTTTATCAAAGTAAGACAGTATGATCAGATACTAGTAGAAATCTGTGGACATAAAGCTATAGGTACAGTGTTAGTAGGACCTACACCTGTCAACATAATTGGAAGAAATCTGTTGACTCAGATTGGTTGCACTTTAAATTTTGAATTGGAAAAGGAAGGAAAAATTTCAAAAATTGGACCTGAAAATCCATACAATACTCCAATATTTGCCATAAAGAAAAAAGACAGTACTAAATGGAGAAAATTAGTAGATTTCAGAGAACTTAAAAGAACTCAAGACTTCTGGGAAGTTCAATTAGGA…
>AUT-400228338
AAGGAAGCTCTATTAGATACAGGAGCAGATGATACAGTATTAGAAGAAATGAATTTRCCAGGRAGATGGAAACCAAAAATGATAGGGGGAATTGGAGGTTTTATCAAAGTAAAACAGTATGATCAAATACCCATAGAAATCTGTGGGAATAAAGCAGTAGGTACAGTATTAGTAGGACCTACACCTGTCAACATAATTGGAAGAAATCTGTTGACTCAGATTGGTTGCACTTTAAATTTTGAAATGGAGAAGGAAGGGAAAATTTCAAAAATTGGGCCTGAAAATCCATATAATACTCCAGTGTTTGCCATAAAGAAAAARGACAGTACTAAATGGAGAAAATTAGTAGATTTCAGAGAACTTAAGAGAACTCAAGACTTCTGGGAAGTTCAATTAGGA…
>AUT-400228747
AAGGAAGCTCTATTAGATACAGGAGCAGATGATACAGTATTAGAAGACATGAGTTTGCCAGGAAGATGGAAACCAAAAATGATAGGGGGAATTGGAGGTTTTATCAAAGTAAAACAGTATGATCAGATACCAATAGAAATCTGTGGACATAAAGCTATAGGTACAGTATTAGTAGGACCTACACCTGTCAACATAATTGGGAGAAATCTGTTGACTCAGATTGGATGCACTTTAAATTTTGAAATGGAAAAGGAAGGAAAAATTTCAAAGATTGGGCCTGAAAATCCATACAATACTCCAGTATTTGCCATAAAGAAAAAAGACAGTACTAAATGGAGAAAATTAGTAGATTTCAGAGAACTTAAGAGAACTCAAGACTTCTGTGAAGTTCAATTGGGR…
>AUT-400230083
AAGGAAGCTCTATTAGATACAGGAGCAGATGATACAGTATTAGAAGAAATGAGTTTGCCAGGAAGATGGAAACCAAAAATGATAGGGGGAATTGGAGGTTTTATCAAAGTAAGACAGTATGATCAGATACCCATAGAAATCTGTGGACATAAAGCTATAGGTACAGTATTAATAGGACCTACACCTGTCAACATAATTGGAAGAAATCTGTTGACTCAGCTTGGTTGCACCTTAAATTTTGAAATGGAAAAGGAAGGGAAAATTTCAAAAATTGGGCCTGAAAATCCATACAATACTCCAGTATTTGCCATAAAGAAAAAAGACAGTACTAAATGGAGAAAATTAGTAGATTTCAGAGAACTTAAGAAAACTCAAGATTTCTGGGAAGTTCAGTTAGGA…
>AUT-400230167
AAGGAAGCTCTATTAGATACAGGAGCAGATGATACAGTATTAGAAGACATGAATTTGCCAGGAAGATGGAAACCAAAAATGATAGGGGGAATTGGAGGTTTTATCAAAGTAAGACAGTATGATCAAATACCCATAGAAATCTGTGGGCATAAAGCTATAGGTACAGTATTAGTAGGACCTACACCTGTCAACATAATTGGAAGAAATCTGTTGACTCAGATTGGTTGCACTTTAAATTTTGAAATGGAAAAGGAAGGGAAAATTTCAAAAATTGGGCCTGAAAATCCATATAATACTCCAGTATTTGCCATAAAGAAAAAGGACAGTACTAAATGGAGAAAATTAGTAGATTTCAGAGAACTTAAAAGAACTCAAGACTTCTGGGAAGTTCAATTAGGA…
>AUT-400230169
AAGGAAGCTCTGTTAGATACAGGAGCAGATGATACAGTATTAGAAGACATGAATTTGCCAGGAAGATGGAAACCAAAAATGATAGGGGGAATTGGAGGTTTTATCAAAGTAAGACAATATGATCAAATACCCGTAGAAATCTGTGGACATAAAGCTATAGGTACAGTGTTAATAGGACCTACACCTGTCAACATAATTGGAAGAAATTTGTTGACTCAGATTGGTTGCACCTTAAATTTTGAAATGGAAAAGGAAGGGAAAATTTCAAAAATTGGGCCTGAAAATCCATATAATACTCCAGTATTTGCCATAAAGAAAAAAGACAGTACTAAGTGGAGAAAATTAGTAGATTTCAGGGAACTTAAGAAAACTCAAGACTTTTGGGAAGTTCAATTAGGA…
>AUT-400230472
AGAGAAGCTCTGTTAGATACAGGAGCAGATGATACAGTATTAGAAGATATAGATTTGCCAGGAAAATGGAAACCAAAAATGATAGGGGGAATTGGAGGTTTTATCAAGGTAAGGCAATATGATCAGATACTTATAGAGATTTGTGGAAAAAGGGCTATAGGTACAGTGTTAGTAGGACCTACACCTGTCAACATAATTGGACGAAATATGTTGACTCAGATTGGTTGTACTTTAAA-TTTGAGATGGAAGAGGAAGGAAAAATCTCAAAAATTGGGCCTGAAAATCCATACAATACTCCAGTATTTGCCATAAAGAAAAAGGACAGCACCAAATGGAGGAAATTAGTGGACTTCAGAGAGCTCAAAAGAACTCAGGACTTTTGGGAAGTTCAATTAGGA…
>AUT-400230477
AAAGAAGCTCTATTAGATACAGGAGCAGATGATACAGTATTAGAAGACATAGATTTGCCAGGAAAATGGAAACCAAAAATGATAGGGGGAATTGGAGGTTTTATCAAAGTAAGACARTATGATCAAATACTTATAGAAATTTGTGGAAAAAAGGCTATAGGTACAGTATTAGTAGGACCTACCCCTGTCAACATAATTGGAAGGAATATGTTGACTCAGATTGGTTGTACTTTAAATTTTGAGATGGAAAAGGAAGGAAAAATTTCAAAAATTGGGCCTGAAAATCCATACAATACTCCAGTATTTGCTATAAAGAAAAAGGACAGCACTAAGTGGAGGAAATTAGTAGATTTCAGGGAGCTCAAAAGAACTCAGGACTTTTGGGAAGTTCAATTGGGA…
>AUT-400230757
AAGGAAGCTCTATTAGATACAGGAGCAGATGATACAGTATTAGAAGAAATGAGTTTGCCAGGAAGATGGAAACCAAAAATGATAGGGGGAATTGGAGGTTTTATCAAAGTAAAACAGTATGATCAGATACCAATAGAAATCTGTGGACATAAAGCTATAGGTACAGTATTAGTAGGACCTACACCTGTCAACATAATTGGGAGAAATCTGTTGACTCAACTTGGATGCACTTTAAATTTTGAAATGGAAAAGGAAGGAAAAATTTCAAAGATTGGGCCTGAAAATCCATACAATACTCCAGTATTTGCCATAAAGAAAAAAGACAGTACTAAATGGAGAAAATTAGTAGATTTCAGAGAACTTAAGAGAACTCAAGACTTCTGGGAAGTTCAATTGGGA…
>AUT-400231431
AAGGAAGCTCTATTAGATACAGGAGCAGATGATACAGTATTAGAAGAAATGAATTTGCCAGGAAGATGGAAACCAAAAATGATAGGGGGAATTGGAGGTTTTATCAAAGTAAGACAGTATGATCAGATACTCRTAGAAATCTGTGGACATAAAGCTATAGGTACAGTATTAGTAGGACCTACACCTGTCAACATAATTGGAAGAAACCTGTTGACTCAGATTGGTTGCACTTTAAATTTTGAAATGGAAAAGGAAGGGAAAATTTCAAAAATTGGACCTGAAAATCCATACAATACTCCAGTATTTGCCATAAAGAAAAAGGACAGTACTAAATGGAGAAAATTAGTAGATTTCAGAGAACTTAAGAGAACTCAAGACTTCTGGGAAGTCCAGTTAGGG…
>AUT-400232352
AAGGAAGCTCTATTAGATACAGGAGCAGATGATACAGTATTAGAAGAAATGAATTTGCCAGGAAAATGGAAACCAAAAATGATAGGGGGAATTGGAGGTTTTATCAAAGTAAGACAGTATGAGCAAGTATTAGTAGAAATTTGTGGACATAGAGCTACAGGTACAGTATTAATAGGACCTACACCTGTCAACATAATTGGAAGGAACTTGTTGACTCAGATTGGTTGCACTTTAAATTTTGAAATGGAAAAGGAAGGAAAAATTTCAAAAATTGGGCCTGAAAATCCATACAACACTCCAATATTTGCCATAAAGAAAAAAGACAGTACTAAGTGGAGAAAATTAGTAGATTTCAGAGAACTTAAGAGAACTCAAGATTTTTGGGAGGTTCAACTAGGA…
>AUT-400232468
AAGGAAGCTCTATTAGATACAGGAGCAGATGATACAGTATTAGAAGAAATGAGTTTGCCAGGAAGATGGAAACCAAAAATGATAGGGGGAATTGGAGGTTTTATCAAAGTAAAACAGTATGATCAGATACCAATAGAAATCTGTGGACATAAAGCTATAGGTACAGTATTARTAGGACCTACACCTGTCAACATAATTGGGAGAAATCTGTTGACTCAGCTTGGATGCACTTTAAATTTTGAAATGGAAAAGGAAGGAAAAATTTCAAAGATTGGGCCTGAAAATCCATACAATACTCCAGTATTTGCCATAAAGAAAAAAGACAGTACTAAATGGAGAAAATTAGTAGATTTCAGAGAACTTAAGAGAACTCAAGACTTCTGGGAAGTTCAATTGGGA…
>AUT-400234066
AAGGAAGCTCTATTAGATACAGGAGCAGATGATACAGTATTAGAAGAAATGAATTTACCAGGAAGATGGAAACCAAAAATGATAGGGGGAATTGGAGGGTTTATCAAGGTAAGACAGTATGATCAGGTACCCATAGAAATCTGTGGGCATAAAGCTGTAGGTACAGTATTAATAGGACCTACACCTGTCAACATAATTGGAAGAAATCTGTTGACTCAGCTTGGTTGCACTTTAAATTTTGAAATGGAAAAGGAAGGAAAAATTTCAAAAATTGGGCCTGAAAATCCGTACAATACTCCAGTGTTTGCCATAAAGAAAAAAGACAGTACTAAATGGAGAAAATTAGTAGATTTTAGAGAACTTAAGAGAACTCAAGACTTCTGGGAGGTTCAATTAGGA…
>AUT-400234462
AAGGAAGCTCTATTAGATACAGGAGCAGATGAYACAGTATTAGAAGACATAAATTTGCCAGGAAGATGGAAACCAAAAATGATAGGGGGAATTGGAGGTTTTATCAAAGTAAGACAATATGATCAAATAGTCATAGAAATCTGTGGAAAGAAAGCTATAGGTACAGTATTAGTAGGACCTACACCTGTCAACATAATTGGAAGAAATCTGTTGACTCAGATTGGTTGCACTTTAAATTTTGAAATGGAAAAGGAAGGGAAAATTTCAAAAATTGGGCCTGAAAATCCATATAATACTCCAGTATTTGCCATAAAGAAAAAAGACAGTACTAAATGGAGAAAATTAGTAGATTTTAGAGAACTTAAGAGAACTCAAGACTTTTGGGAGGTTCAATTAGGA…
>AUT-400234722
ATAGAAGCCCTATTAGACACAGGAGCAGATGATACAGTATTAGAAGAAATAGAATTACTAGGGAAATGGAAACCAAAAATGATAGGGGGAATTGGAGGTTTTATCAAAGTAAGACAGTATGATCAGATACCTATAGAGATTTGTGGAAAAAAGGCCATAGGTAGCGTATTAGTAGGACCTACACCTGTCAACATAATTGGACGAAATATGTTGACTCAGATTGGTTGTACTTTAAATTTTGAAATGGAAAAGGAAGGAAAAATTTCAAAAATTGGGCCTGAAAATCCATACAATACTCCAATATTTGCCATAAAGAAAAAAGATAGTACTAAATGGAGAAAATTAGTAGATTTCAGAGAACTCAAGAGAACTCAAGACTTCTGGGAGGTCCAGTTAGGA…
>AUT-400234731
AARGAAGCTCTATTAGATACAGGAGCAGATGATACAGTATTAGAAGACATGGCTTTGCCAGGAAGATGGAAACCAAAAATGATAGGGGGAATTGGAGGTTTTATCAAAGTAAAACAGTATGATCAGATACCCATAGAAATCTGTGGACATAAAGCTATAGGTACAGTATTAGTAGGACCTACACCTGTCAACATAATTGGAAGAAATCTGTTGACACAGCTTGGTTGCACTCTAAATTTTGAAATGGAAAAGGAGGGAAAAATTTCAAAAATTGGGCCTGAAAATCCATACAATACTCCAGTATTTGCCATAAAGAAAAAGGACAGCACTAAATGGAGAAAATTAGTAGATTTCAGAGAACTTAAAAGAACTCAAGACTTCTGGGAAGTTCAATTAGGA…
>AUT-400235166
ATAGAAGCTCTATTAGACACAGGAGCAGATGATACAGTATTAGAAAACATAARTTTACCAGGAAAATGGAAACCAAAAATGATAGGGGGAATTGGAGGTTTTATTAAAGTAAGACAATATGATCAGATACTTATAGAAATTTGTGGAAAAAGGGCCATAGGTACAGTATTAGTAGGACCTACACCTGTCAACATAATTGGAAGAAAYATGTTGACTCAGATTGGTTGTACTTTAAATTTTGAAATGGAGAAGGAAGGAAAGATTTCAAAAATTGGGCCTGAAAATCCATATAACACTCCAATATTTGCCATAAAGAAAAAAGACAGTACTAAATGGAGAAAATTGGTAGATTTCAGAGAGCTCAAAAGAACTCAAGACTTCTGGGAGGTCCAATTGGGA…
>AUT-400235481
AGAGAAGCTTTATTAGATACAGGAGCAGATGATACAGTWTTAGAAGATATAAATTTGCCAGGAAAATGGAAACCAAAAATGATAGGGGGAATTGGAGGTTTTATCAAGGTAAGGCAATATGATCAGATACTTATAGAAATTTGTGGRAAAAAGGCTATAGGTACAGTRTTAGTAGGACCTACACCTRTCAACATAATYGGACGAAACATGTTGACTCAGCTTGGTTGTACTTTAAA-TTTGAGATGGAAGAGGAAGGAAAAATCTCAAAAATTGGGCCTGAAAATCCATACAATACTCCAGTATTTGCYATAAAGAAAAAGGACAGCACCAAATGGAGAAAATTAGTAGATTTCAGAGAGCTTAAAAGAACTCAGGACTTTTGGGAAGTTCAATTAGGA…
>AUT-400235482
AAAGAAGCTTTATTRGATACAGGAGCAGATGATACAGTATTAGAAGATATCAATTTGCCAGGAAAATGGAAACCAAAAATGATAGGGGGAATTGGAGGTTTTATCAAGGTAAGGCAATATGATCAGATACTTATAGAAATTTGTGGAAARAAGGCTATAGGTACAGTATTAGTAGGACCTACACCTGTCAACATAATTGGACGAAACATGTTGACTCAGATTGGTTGTACTATAAA-TTTGAGATGGAAGAGGAAGGAAAAATCTCAAAAATAGGGCCTGAAAATCCATACAATACTCCAGTATTTGCTATAAAGAAAAAGGACAGCACCAAATGGAGAAAATTAGTAGATTTCAGAGAGCTTAAAAGAACTCAGGAATTTTGGGAAGTTCAATTAGGA…
>AUT-400235678
AGGGAGGCTCTCTTAGACACAGGAGCAGATGATACAGTATTAGAAGACATAGATTTGCCAGGAAGATGGAAACCAAAAATGATAGGAGGAATTGGAGGTTTTATCAAAGTAAGACAGTATGATCAAATASTTATAGAAATTTGTGGAAAAAAGGCTATAGGTACAGTATTGGTAGGACCTACTCCTGTCAACATAATTGGAAGGAACATGTTGACTCAGCTTGGATGCACACTAAATTTTGAAATGGAAAAGGAAGGAAAAATYACAAAAATTGGGCCTGAAAACCCATATAACACTCCAGTATTTGCCATAAAAAAGAAGGACAGTACTAAATGGAGAAAATTAGTAGATTTCAGAGAACTCAAAAGAACCCAAGACTTTTGGGAAGTTCAATTAGGA…
>AUT-400235854
AAGGAAGCTCTATTAGATACAGGAGCAGATGATACAGTATTAGAAGAAATAAATTTGCCAGGAAGATGGAAACCAAAAATGATAGGGGGAATTGGAGGTTTTATCAAAGTAAGACAGTATGATCAAGTASCCATAGAAATCAGTGGACACAAAGCTATAGGTACAGTATTARTAGGACCTACACCTGTCAACATAATTGGAAGAAATCTRTTGACTCAGATTGGTTGCACTTTAAATTTTGAAATGGAAAAGGAAGGRAAAATTTCAAAAATTGGGCCTGAAAATCCATATAATACTCCAGTATTTGCCATAAAGAAAAAAGACAGTACTAAATGGAGAAAATTRGTAGATTTCAGAGAACTTAAGAGAACTCAAGACTTCTGGGAAGTTCAATTAGGA…
>AUT-400236552
AAGGAAGCTCTATTAGATACAGGAGCAGATGATACAGTATTAGAAGAAATGAATTTGCCAGGGAGATGGAAACCAAAAATGATAGGGGGAATTGGAGGCTTTATCAAAGTAAGACAGTATGATCAGATACCCATAGAAATCTGTGACCATAAGGCTATAGGTACAATATTAGTAGGACCTACACCTGTCAACATAATTGGAAGAAATCTGTTGACTCAGATTGGTTGCACTTTAAATTTTGAAATGGAAAAGGAAGGAAAAATTTCAAAAATTGGGCCTGAAAATCCATACAATACTCCAGTATTTGCCATAAAGAAAAAAGACAGTACTAAATGGAGAAAATTAGTAGACTTCAGAGAACTCAAGAGAACACAAGACTTCTGGGAAGTTCAATTAGGA…
>AUT-400237459
ATAGAAGCCCTATTAGACACAGGAGCAGATGATACAGTRTTAGAAGAAATAGATTTACCAGGAAGATGGAAACCAAAAATGATAGGGGGAATTGGAGGTTTTATTAAAGTAAGGCAATATGATCAGATACTTATAGAAATTGAAGGAAAAAAGGCTATAGGGACAGTACTAGTAGGACCTACACCTATCAACATAATTGGGAGGAATATGTTGACTCAGATTGGATGTACTTTAAATTTTGAWATGGAAAAGGAAGGAAAAATTTCAAAAATTGGGCCTGAAAATCCATACAATACTCCAGTATTTGCCATAAAGAAAAAAGATAGTACTAAATGGAGAAAATTAGTAGATTTCAGAGAACTCAAGAGAACTCAAGACTTCTGGGAGGTCCAATTAGGA…
>AUT-400238082
AAGGAAGCTCTCCTAGATACAGGAGCAGATGATACAGTATTAGAAGAAATAGAATTGCCAGGAAAATGGAAACCAAAATTGATAGGGGGAATTGGAGGTTTTATCAAAGTAAGGCAGTATGAACAAATACCCATAGAAATTTGTGGAAAAAAGGCTATAGGTACAGTATTAGTAGGACCTACACCTGTCAACATAATTGGAAGAAATATGTTGACACAGCTTGGATGCACACTAAATTTTGAAATGGAGAAGGAGGGAAAAATTACAAAAATTGGGCCTGAAAATCCATATAACACTCCAGTATTTGCCATAAAAAAGAAGGACAGTACTAAGTGGAGAAAATTAGTAGATTTCAGGGAACTCAAAAGAACTCAAGACTTTTGGGAGGTTCAATTGGGA…
>AUT-400238200
AAGGAAGCTCTATTAGATACAGGAGCAGATGATACAGTATTAGAAGAAATGAGTTTGCCAGGAAGATGGAAACCAAAAATGATAGGGGGAATTGGAGGTTTTATCAAAGTAAAACAGTATGATCAGATACCAATAGAAATCTGTGGACATAAAGCTATAGGTACAGTATTAGTAGGACCTACACCTGTCAACATAATTGGGAGAAATCTGTTGACTCAGCTTGGATGCACTTTAAATTTTGAAATGGAAAAGGAAGGAAAAATTTCAAAGATTGGGCCTGAAAATCCATACAATACTCCAGTATTTGCCATAAAGAAAAAAGACAGTACTAAATGGAGAAAATTAGTAGATTTCAGAGAACTTAAGAGAACTCAAGACTTCTGGGAAGTTCAATTGGGA…
>AUT-400238423
ATAGAAGCCCTATTAGACACAGGAGCAGATGATACAGTATTAGAACAAATAACTTTACCAGGAAAATGGAAACCAAAAATGATAGGGGGAATTGGAGGATTTATCAAAGTAAAACAGTATGATCAAATACTTATAGAAATTGAAGGGAAAAAGGCTATAGGGACAGTATTAGTAGGACCTACACCTATCAACATAATTGGAAGAAATATGTTGACTCAGATTGGTTGTACTTTAAATTTTGAAATGGAAAAGGAAGGGAAAATTTCAAAAATTGGGCCTGAAAATCCATACAACACTCCAATATTTGCCATAAAGAAAAAAGACAGTACTAAATGGAGAAAATTGGTAGATTTCAGAGAGCTCAAAAGAACTCAAGATTTCTGGGAGGTCCAATTAGGT…
>AUT-400239019
AAGGAAGCTCTATTAGATACAGGAGCAGATGATACAGTACTAGAAGAAATGAATTTGCCAGGAAAATGGAGACCAAAAATGATAGGGGGAATTGGAGGTTTTATCAAAGTGAGACAGTATGATCAAATACTCGTAGAAATCTGTGGAAAAAAGGCTATAGGTACAGTATTAGTAGGACCTACACCTGTCAACATAATTGGAAGAAATCTGTTGACTCAGATTGGTTGCACTTTAAATTTTGAAATGGAAAAGGAAGGGAAAATTTCAAAAATTGGGCCTGAAAATCCATATAATACTCCAGTATTTGCCATAAAGAAAAAAGACAGTACTAAATGGAGAAAATTAGTAGATTTCAGAGAACTTAGGAAAACTCAAGACTTCTGGGAAGTTCAGTTAGGA…
>AUT-400239369
AAGGAAGCTCTATTAGATACAGGAGCAGATGATACAGTATTAGAGGAAATGAGTTTGCCAGGAAGATGGAAACCAAAAATGATAGGGGGAATTGGGGGTTTTATCAAAGTAAGACAGTATGATCAGATATCCATAGAAATCTGTGGACATAAAGCTATAGGTACAGTGTTAATAGGACCTACACCTGTCAACATAATTGGAAGAAATCTGTTGACTCAAATTGGTTGCACCTTAAATTTTGAAATGGAAAAGGAAGGGAAAATTTCAAGAATTGGGCCTGAAAATCCATACAATACTCCAGTATTTGCCATAAAGAAAAAAGACAGTACTAAATGGAGAAAATTAGTAGATTTCAGAGAACTCAAGAAAACTCAAGACTTCTGGGAGGTTCAATTAGGA…
>AUT-400239390
AAGGAAGCTCTATTAGATACAGGAGCAGATGATACAGTATTAGAAGAAATGAGTTTGCCAGGAAGATGGAAACCAAAAATGATAGGGGGAATTGGAGGTTTTATCAAAGTAAAACAGTATGATCAGATACCAATAGAAATCTGTGGACATAAAGCTATAGGTACAGTATTAGTAGGACCTACACCTGTCAACATAATTGGGAGAAATCTGTTGACTCAGCTTGGATGCACTTTAAATTTTGAAATGGAAAAGGAAGGAAAAATTTCAAAGATTGGGCCTGAAAATCCATACAATACTCCAGTATTTGCCATAAAGAAAAAAGACAGTACTAAATGGAGAAAATTAGTAGATTTCAGAGAACTTAAGAGAACTCAAGACTTCTGGGAAGTTCAATTGGGA…
>AUT-400239763
AGGGAGGCACTATTRGATACAGGGGCAGATGATACAGTATTAGAAGATATAAATTTGTCAGGAAAATGGAAACCAARAATGATAGGGGGAATTGGGGGTTTTATCAAAGTAARGCAGTATGATCAARTAYYCATAGAAATTTGTGGCCATAAAGCTATAGGTACAGTATTAGTAGGACCTACGCCTGTCAACATAATTGGAAGAAATATGTTGACTCAGATTGGMTGYACTTTAAATTTTGATATGGAAAAAGAAGGAAAAATTTCAAAAATTGGGCCAGAAAATCCATACAATACTCCAGTATTTGCCATAAAGAAAAAGGACAGTACTAAATGGAGAAAATTAGTAGATTTCAGAGAACTTAAAAGAACTCAAGATTTTTGGGAAGTTCAATTAGGR…
>AUT-400239913
AAGGAAGCTCTATTAGATACAGGAGCAGATGATACAGTCTTAGAAGAAATGGAGTTACCAGGAAGGTGGAAACCAAAAATGATAGGGGGAATTGGAGGTTTTATCAAAGTAAGACAGTATGATCAGATACCCATAGAAATCTGCGGACATAAAACTATAGGTACAGTATTAGTAGGACCTACACCTGTCAACATAATTGGAAGAAATCTGTTGACCCAGATTGGTTGCACTTTAAATTTTGAAATGGAAAAGGAAGGGAAAATTTCAAAAATTGGGCCTGAAAATCCATACAATACTCCAGTATTTGCCATAAAGAAAAAGGATGGTACAAAATGGAGAAAATTAGTAGATTTCAGAGAACTTAAGAGAACTCAAGACTTCTGGGAAGTTCAATTAGGG…
>AUT-400239914
ATAGAAGCCCTATTAGACACAGGAGCAGATGATACAGTATTAGAAGAAATAGATTTACCAGGAAGATGGAAACCAAAAATGATAGGGGGAATTGGAGGTTTTATCAAAGTAAGACAGTATGATCAGATACTTATGGAAATTTGTGGAAAAAAGGCCATAGGTACAGTATTAGTAGGACCTACACCTGTTAACATAATTGGACGAAATATGTTGACTCAGATTGGTTGTACTTTAAATTTTGARATGGAAAAGGAAGGAAAAATTTCAAAAATTGGGCCTGAAAACCCATACAATACTCCAGTATTTGCCATAAAGAAAAAAGATAGTACTAAATGGAGAAAATTAGTAGATTTCAGAGAACTCAAGAGAACTCAAGACTTCTGGGAGGTTCAATTAGGA…
>AUT-400239915
AGAGAAGCTCTATTAGACACAGGAGCAGATGATACAGTATTAGAAGAAATAGATTTGCCAGGAAAATGGAAACCAAAAATGATAGGGGGAATTGGAGGTTTTATCAAAGTAAGACAGTATGATCAGATACTTATAGAAATCTGTGGAAAAAAGGCTATYGGTACRGTATTAGTAGGACCTACCCCTGTCAACATAATTGGAAGAAATATGTTGACTCAGCTTGGTTGTACTTTAAATTTTGAGATGGAAAAGGAAGGAAAAATTTCAAAAATTGGGCCTGAAAATCCATACAATACTCCAGTATTTGCTATAAAGAAAAAGGACAGCACTAAGTGGAGAAAATTAGTAGATTTCAGGGAGCTCAAAAGAACTCAGGACTTTTGGGAAGTTCAATTAGGA…
>AUT-400240512
AAGGAAGCTCTATTAGATACAGGAGCAGATGATACAGTATTAGAAGACATGAGTTTGCCAGGAAGGTGGAAACCAAAAATGATAGGGGGAATTGGAGGTTTTATCAAAGTAAGACAGTATGATCAAATACCCATAGAAATYTGTGGACATAAAGCTATAGGTACAGTATTAGTAGGACCTACACCTGTCAACATAATTGGAAGAAATCTGTTGACTCAGATTGGTTGCACTTTAAATTTTGAAATGGAAAAGGAAGGGAAAATTTCAAAAATTGGGCCTGAAAATCCGTATAATACTCCAGTATTTGCCATAAAGAAAAAAGACAGTACTAAATGGAGAAAATTAGTAGATTTCAGAGAACTTAAGAAAACTCAAGACTTCTGGGAAGTTCAATTAGGA…
>AUT-400241504
AAGGAAGCTCTATTAGATACAGGAGCAGATGATACAGTATTAGAAGAAATGACTTTGCCAGGAAGATGGAAACCAAAAATGATAGGGGGAATTGGAGGTTTTATCAAAGTAAGACAGTATGATCAGATATCCATAGAAATCTGTGGCCATAAGGCTATAGGTACAGTATTAATAGGACCTACACCTGTCAACATAATTGGAAGAAATCTGTTGACTCAGATTGGTTGCACTTTAAATTTTGAAATGGAAAAGGAAGGGAAAATTTCAAAAATTGGGCCTGAGAATCCATACAATACTCCAGTATTTGCCATAAAGAAAAAAGACAGTACTAAATGGAGAAAGTTAGTAGATTTCAGAGAACTTAAAAGAACTCAAGACTTCTGGGAAGTTCAATTAGGA…
>AUT-400241868
AAGGAAGCTCTATTRGATACAGGAGCAGATGATACAGTATTAGAAGAAATAAATTTGRCAGGAAGATGGAARCCAAAAATGATAGGGGGAATTGGAGGTTTTATCAAAGTAAGACAGTATGATCAGGTACCCGTAGAAATCTGCGGGCATAAAGCTATAGGTACAGTCTTAGTAGGACCTACACCTGTCAACATAATTGGAAGAAATCTGTTGACTCAGATTGGYTGCACTTTAAATTTTGAAATGGAAAAGGAAGGACAAATTTCAAAAATTGGGCCTGAAAATCCATACAATACTCCAGTATTTGCMATAAAGAAAAAAGACAGTACTARATGGAGAAAATTGGTAGATTTCAGGGAACTTAAGAGAACTCAAGACTTCTGGGAAGTTCAATTAGGA…
>AUT-400241870
ATAGAAGCTCTATTAGACACAGGAGCAGATGATACAGTATTAGAACAAATAAATTTACCAGGAAAATGGAAACCAAAAATGATAGGGGGAATTGGAGGATTTATCAAAGTAAAACAGTATGATCAAATACTTATAGAAATTGAAGGGAGAAAGGCTATAGGGACAGTACTAGTAGGACCTACACCTATCAACATAATTGGGAGAAATATGTTGACTCAAATTGGCTGTACTTTAAATTTTGAGATGGAAAAGGAAGGGAAAATTTCAAAAATTGGGCCTGAAAATCCATACAACACTCCAATATTTGCCATAAAGAAAAAAGACAGTACTAAATGGAGAAAGTTGGTAGATTTCAGAGAGCTCAAAAGAACYCAAGACTTCTGGGAGGTCCAATTAGGC…
>AUT-400242089
AAGGAAGCTCTATTAGATACAGGAGCAGATGATACAGTATTAGAAGAAATGAGTTTGCCAGGAAGATGGAAACCAAAAATGATAGGGGGAATTGGAGGTTTTATCAAAGTAAAACAGTATGATCAGATACCAATAGAAATCTGTGGACATAAAGCTATAGGTACAGTATTAATAGGATCTACACCTGTCAACATAATTGGGAGAAATCTGTTGACTCAGMTTGGATGCACTTTAAATTTTGAAATGGAAAAGGAAGGAAAAATTTCAAAGATTGGGCCTGAAAATCCATACAATACTCCAGTATTTGCCATAAAGAAAAAAGACAGTACTAAATGGAGAAAATTAGTAGATTTCAGAGAACTTAAAAGAACTCAAGACTTCTGGGAAGTTCAATTGGGA…
>AUT-400242090
AAGGAAGCTCTATTAGATACAGGAGCAGATGATACAGTATTAGAAGAAATAAATTTGCCAGGAAGATGGAAACCAAAAATGATAGGGGGAATTGGAGGTTTTATCAAAGTAAGACAATATGATCAGATACCCATAGAAATCTGTGGAAAGAAAGCTATAGGTACAGTATTAGTAGGACCTACACCTGTCAACATAATTGGAAGGAATTTGTTGACGCAGATTGGCTGCACTTTAAATTTTGAAATGGAAAAGGAAGGAAAAATTTCAAAAATTGGGCCTGAAAATCCATACAATACTCCAGTATTTGCCATAAAAAAGAAAGACAGTACTAAATGGAGAAAATTAGTAGATTTCAGAGAACTTAAGAGAACTCAAGACTTCTGGGAAGTTCAATTAGGA…
>AUT-400242313
ATAGAAGCCCTATTAGACACAGGAGCAGATGATACAGTATTAGAAGAAATAGATTTACCAGGAAAATGGAAGCCAAAAATGATAGGGGGAATTGGAGGTTTTATCAAAGTAAGACAGTATGATCAGATACTTATAGAAATTTGTGGAAAAAGGGCCATAGGTACAGTATTAGTAGGACCTACACCTGTCAACATAATTGGACGGAATATGTTGACTCAAATTGGCTGTACTTTAAATTTTGAGATGGAAAAGGAAGGAAAAATTTCAAAAATCGGGCCTGAAAATCCATACAATACTCCAGTATTTGCCATAAAGAAAAAAGATAGTACTAAATGGAGAAAATTAGTAGATTTCAGAGAACTCAAGAGAACTCAAGACTTCTGGGAGGTCCAATTAGGA…
>AUT-400242511
AAGGAAGCTCTATTAGATACAGGAGCAGATGATACAGTATTAGAAGAAATGAGTTTGCCAGGAAGATGGAAACCAAAAATGATAGGGGGAATTGGAGGTTTTATCAAAGTAAGACAATATGATCAGGTAAGTTTAGAAATCTGTGGACATAAAGCTATAGGTACAGTATTAGTAGGACCTACACCTGTCAACATAATTGGAAGAAATCTGTTGACTCAAATTGGTTGCACTTTAAATTTTGAAATGGAAAAGGAAGGAAAAATTTCAAAAATTGGGCCTGAAAATCCATACAATACTCCAATATTTGCTATAAAGAAAAAAGACAGTACTAAATGGAGAAAATTAGTAGATTTCAGAGAACTTAAAAGAACTCAAGACTTCTGGGAAGTTCAATTGGGG…
>AUT-400242819
ATAGAAGCCCTATTAGACACGGGAGCAGATGATACAGTATTAGAAGAAATAAATTTACCAGGAAGATGGAAACCAAAAATGATAGGGGGAATTGGAGGTTTTATCAAAGTAAGACAATATGATCAGATACTTATAGAAATTTGTGGAAAAAAGGCTATAGGTACAGTGTTAGTAGGACCTACACCTGTCAACATAATTGGACGAAATATGTTGACYCAGATTGGTTGTACTTTAAATTTTGAGATGGAAAAGGAAGGAAARATTTCAAAAATTGGGCCTGAAAACCCATATAATACTCCAATATTTGCCATAAAGAAAAARGATAGTACTAAATGGAGAAAATTAGTAGATTTCAGAGAACTCAAAAGAACTCAAGACTTCTGGGAGGTACAACTAGGG…
>AUT-400242823
AAGGAAGCTCTATTAGATACAGGAGCAGATGATACAGTATTAGAAGACATGAATTTGACAGGAAGATGGAAACCAAAAATGATAGGGGGAATTGGAGGTTTTATCAAAGTGAGACAGTATGATCAGGTAYCCATAGAAATCTGTGGACAAAAAGTTATAGGTACAGTGTTAGTAGGACCTACACCTGTCAACATAATTGGAAGAAATCTGTTGACTCAGCTTGGTTGCACTTTAAATTTTGAAATGGAAAAGGAAGGWAAAATTTCAAAAATTGGGCCTGAAAATCCATACAATACTCCAGTATTTGCTATAAAGAAAAAAGACAGTACTAAATGGAGAAAATTAGTAGATTTCAGAGAACTTAAGAGAACTCAAGACTTCTGGGAAGTTCAATTAGGA…
>AUT-400242964
AGAGAAGCTCTATTAGATACAGGAGCAGATGATACAGTATTAGAAGACATAGATTTGCCAGGGAAATGGAAACCAAGAATGATAGGGGGAATTGGAGGTTTCATCAAAGTAAAACAGTATGAACAAATACTTATAGAAATTTGTGGAAAAAAGGCTATAGGTACAGTATTAGTAGGGCCTACACCTGTCAACATAATAGGAAGAAACATGTTGACTCAGATTGGTTGTACTCTAAATTTYGAAATGGAAAAAGAAGGAAAAATTTCAAAAATTGGGCCTGAAAATCCATACAATACTCCAATATTTGCAATAAAGAAAAAGGATAGCACTAAATGGAGAAAATTAGTAGATTTCAGAGAACTCAAAAGAACACAAGACTTTTGGGAAGTTCAATTAGGA…
>AUT-400244121
AAGGAAGCTCTATTAGATACAGGAGCAGATGATACAGTATTAGAAGAAATGAATTTGCCAGGAAAATGGAGGCCAAAAATGATAGGGGGAATTGGAGGTTTTATCAAAGTAAGACAGTATGATCAAGTACATATAGAAATTTGTGGAAGTAAAGTTATAGGTACAGTATTAGTAGGACCTACACCTGTCAACATAATTGGAAGAAATCTGTTGACTCAGCTTGGTTGCACTTTAAATTTTGAAATGGAAAAGGAAGGGAAAATTTCAAAAATTGGGCCTGAGAATCCATATAATACTCCAGTGTTTGCTATAAAGAAAAAAGACAGTACTAAATGGAGAAAGTTAGTAGATTTCAGAGAACTTAAGAGAACTCAAGACTTCTGGGAAGTTCAATTAGGA…
>AUT-400244912
AAGGAAGCTCTATTAGATACAGGAGCAGATGATACAGTAGTAGAAGAAATGTATTTGCCAGGAAGATGGAAACCAAARATGATAGGGGGAATTGGAGGATTTATTAAAGTAAAACAATATGATCAGGTACCCCTTGAAATCTGTGGGCACAAGGCTATAGGTACAGTATTAGTAGGCCCTACACCTGTCAACATAATTGGAAGAAAYCTGTTGACTCAGATTGGTTGCACTTTAAACTTTGAAATGGAAAAGGAAGGGAAAATTTCAAAAATTGGGCCTGAAAATCCATACAATACTCCAGTATTTGCTATAAAGAAAAAAGACAGTACTAAATGGAGAAAATTAGTAGATTTCAGAGAACTTAAGAGAACTCAAGACTTCTGGGAAGTCCAATTAGGA…
>AUT-400246172
AAGGAAGCTCTATTGGATACAGGAGCAGATGATACAGTATTAGAAGACATGAATTTGCCAGGAAAATGGAAACCAAAAATGATAGGGGGAATTGGAGGTTTTATCAAAGTAAGGCAGTATGATCAGGTACCCTTAGAAATCTGTGGACATAAAGTTATAGGTACAGTATTAGTAGGACCTACACCTGTCAACATAATTGGAAGAAATCTGTTGACTCAGCTTGGTTGCACTTTAAATTTTGAAATGGAAAAGGAAGGAAAAATTTCAAAAATTGGGCCTGAAAATCCATACAATACTCCAGTATTTGCCATAAAGAAAAAAGACAGTACTAAATGGAGAAAATTAGTAGACTTCAGGGAACTTAAGAAAACTCAAGACTTCTGGGAAGTCCAATTAGGA…
>AUT-400246174
AAGGAAGCTCTATTAGATACAGGAGCAGATGATACAGTATTAGAAGAAATGAGTTTGCCAGGAAGATGGATACCAAAAATGATAGGGGGAATTGGAGGTTTTATCAAAGTAAGACAGTATGAACAGGTACCTGTAGAAATTTGTGGACATAAAGCTATAGGTACAGTATTAGTAGGACCTACACCTGTCAACATAATTGGAAGAAATCTGTTGACTCAGGTTGGCTGTACTTTAAATTTTGAAATGGAAAAGGAAGGGAAAATTTCAAGAATTGGGCCTGAGAATCCATATAATACTCCAGTATTTGCCATAAAGAAAAAAGACAGTACTAAATGGAGAAAACTAGTAGATTTCAGAGAACTTAAGAGAACTCAAGACTTCTGGGAAGTTCAATTAGGA…
>AUT-400246750
AAGGAAGCTCTATTAGATACAGGAGCAGATGATACAGTATTAGAAGAAATGAGTTTGCCAGGAAGATGGAAACCAAAAATGATAGGGGGAATTGGAGGTTTTATCAAAGTAAAACAGTATGATCAGATACCAATAGAAATCTGTGGACATAAAGCTATAGGTACAGTATTAGTAGGACCTACACCTGTCAACATWATTGGGAGAAATCTGTTGACTCAGCTTGGATGCACTTTAAATTTTGAAATGGAAAAGGAAGGAAAAATTTCAAAGATTGGGCCTGAAAATCCATACAATACTCCAGTATTTGCCATAAAGAAAAAAGACAGTACTAAATGGAGAAAATTAGTAGATTTCAGAGAACTTAAGAGAACTCAAGACTTCTGGGAAGTTCAATTGGGT…
>AUT-400247283
ATAGAAGCCCTATTAGACACAGGGGCAGATGATACAGTATTAGAAGAAATAGATTTACCAGGAAAATGGAAACCAAAAATGATAGGGGGAATTGGAGGTTTTATTAAAGTAAGACAATATGATCAGATACTTATAGAAATTTGTGGAAAAAAGGCTATAGGTACAGTGTTAGTAGGACCTACACCTGTCAACATAATTGGACGAAATATGTTGACTCAGATTGGTTGTACTTTAAATTTCGAGATGGAAAAGGAAGGGAAAATTTCAAAAATTGGGCCTGAAAATCCATACAATACTCCARTATTTGCCATAAAGAAAAAAGAYAGTACTAAATGGAGAAARTTAGTAGATTTCAGAGAACTCAAAAGAACTCAAGACTTCTGGGAGGTCCAATTAGGA…
>AUT-400247577
ATAGAAGCCCTATTAGACACAGGAGCAGATGATACAGTATTAGAAGACATAAATTTACCAGGAAAATGGAAACCAAAAATGATAGGGGGAATTGGAGGTTTCATTAAAGTAAGACAATATGATCAGATACTTATAGAAATTTGTGGAAAAAGGGCTATAGGTACAGTATTGGTAGGACCTACRCCCGTCAACATAATTGGAAGAAACATGTTGACTCAGATTGGTTGTACTTTAAATTTTGAGATGGAAAAAGAAGGAAAAATTTCAAAAATTGGGCCTGAAAATCCATACAATACTCCAGTATTTGCCATAAAGAAAAAGGATAGTACTAAATGGAGAAAATTAGTAGATTTCAGAGAACTCAAGAGAACTCAAGACTTCTGGGAAGTTCAATTAGGA…
>AUT-400247578
AAGGAAGCTCTATTAGATACAGGAGCAGATGATACAGTATTAGAAGAAATAAATTTGCCAGGAAGATGGAAGCCAAAAATGATAGGGGGAATTGGAGGTTTTATCAAAGTAAGACAGTATGATCAGATACTTGTAGAAATTTGTGGACATAAAGCTATAGGTACAGTATTAGTAGGACCTACACCTGTCAACATAATTGGAAGAAATCTGTTGACTCAGATTGGTTGCACTTTAAATTTTGAAATGGAAAAGGAAGGGAAAATTTCAAAAATTGGGCCTGAAAATCCATACAATACTCCAGTATTTGCCATAAAGAAAAAAGACAGTTCTAAATGGAGAAAGTTAGTAGATTTCAGAGAACTTAAGAAAACTCAAGACTTCTGGGAAGTYCAATTAGGA…
>AUT-400247579
AARGAAGCTCTATTAGATACAGGAGCAGATGAYACAGTWTTAGAAGAAATGAATTTGCCAGGAAGATGGAGACCAAAAATGATAGGGGGAATTGGAGGTTTTATCAAAGTAAGACAGTATGATCARGTACCCATAGAAATCTGTGGRAATAAAGCTATAGGTACAGTRTTAATAGGACCTACACCTGTCAACATAATTGGAAGAAAYCTGTTGACTCAGATTGGTTGCACTTTAAATTTTGAGATGGAAAAGGAAGGGAAAATCTCAAAAATTGGGCCTGAAAATCCATATAATACTCCAGTATTTGCAATAAAGAAAAAAGACAGTACTAAATGGAGAAAATTAGTAGATTTTAGAGAACTTAAGAGAACTCAAGACTTCTGGGARGTYCAATTAGGA…
>AUT-400247844
AAGGAAGCTCTATTAGATACAGGAGCAGATGATACAGTATTAGAAGAAATGAGTTTRCCAGGAAGATGGAAACCAAAAATGATAGGGGGAATTGGAGGTTTTATCAAAGTAAGACAGTATGATCAGRTATCCATAGAAATCTGTGGACATAAAGCTTTAGGTACAGTATTAATAGGRCCTACACCTGTCAACATAATTGGAAGAAATCTGTTGACTCAGATTGGCTGCACATTAAATTTTGAAATGGAAAAGGAAGGGAAAATTTCAAAAATTGGGCCTGAAAATCCATACAATACTCCAGTATTTGCCATAAAGAAAAAAGACAGTACTAAATGGAGAAAAYTAGTAGATTTCAGRGAACTTAAGAGAACTCAAGACTTCTGGGAAGTTCAGTTAGGA…
>AUT-400247998
AGAGAAGCTCTATTAGATACAGGAGCAGATGATACAGTATTAGAAGACATAGATTTGCCAGGGAAATGGAAACCAAGAATGATAGGGGGAATTGGAGGTTTCATCAAAGTAAAACAGTATGATCAGATACTTATAGAAATTTGTGGAAAAAAGGCTATAGGTACAGTATTAATAGGACCTACACCTGTCAACATAATTGGAAGAAATATGTTGACCCAGATTGGTTGTACTTTAAATTTTGAAATGGAAAAAGAAGGAAAAATTTCAAAAATTGGGCCTGAAAATCCATACAATACTCCAGTATTTGCTATAAAGAAAAAAGACAGYACTAAATGGAGAAAATTAGTAGATTTCAGGGAGCTCAAAAGAACTCAGGACTTCTGGGAAGTTCAATTAGGA…
>AUT-400248323
AGAGAAGCTCTATTAGATACAGGAGCAGATGATACAGTATTAGAAGACATAGATTTGCCAGGGAAATGGAAACCAAAAATGATAGGGGGAATTGGAGGTTTCATCAAGGTAAAACAATATGATCAGATACTTATAGAAATTTGTGGAAAAAAGGCTATAGGTACAGTATTAGTAGGACCTACACCTGTCAACATAATTGGAAGAAACATGTTGACCCAGATTGGTTGTACTTTAAATTTCGAGATGGAAAAGGAAGGAAAAATTTCAAAAATTGGGCCTGAAAACCCATACAATACTCCAATATTTGCAATAAAGAAAAAAGATAGCACTAAATGGAGAAAATTAGTAGATTTCAGAGAGCTCAAAAGAACACAAGACTTTTGGGAAGTTCAATTAGGG…
>AUT-400249169
AAGGAAGCTCTATTAGATACAGGAGCAGATGATACAGTATTAGAAGAAATRAATTTGCCAGGGAGATGGAAACCAAAAATGATAGGGGGAATTGGAGGCTTTATCAAAGTAAGACAGTATGATCAGATACTTGTAGAAATATGTGGACATAAAGCTATAGGTACAGTATTAGTAGGACCCACACCTGTCAACATAATTGGAAGAAATCTATTAACTCAGATTGGTTGCACTTTAAATTTTGAAATGGAAAAGGAAGGAAAAATTTCAAAAATTGGGCCTGAAAATCCATACAATACTCCAGTATTTGCCATAAAGAAAAAAGACAGTACTAAATGGAGAAAATTAGTAGATTTTAGAGAACTTAAGAGAACTCAAGACTTCTGGGAAGTTCAATTAGGG…
>AUT-400251581
AAGGAAGCTCTATTAGATACAGGAGCAGATGATACAGTATTAGAAGAAATGAATTTGCCAGGAAGATGGAAACCAAAAATGATAGGGGGAATTGGAGGTTTTATCAAAGTAAGACAGTATGATCARATACCCATAGAAATCTGTGGACATAAAGCTATAGGTACAGTATTAGTAGGACCTACACCTGTCAACATAATTGGAAGAAATCTGTTGACTCAGCTTGGTTGCACCTTAAATTTTGAAATGGARAAGGAAGGAAAAATTTCAAAAATTGGGCCTGAAAATCCATACAATACTCCAGTATTTGCCATAAAGAAAAAAGACAGTACTAAATGGAGRAAATTAGTAGATTTCAGAGAGCTTAAAAGAACTCAAGACTTCTGGGAAGTTCAATTAGGA…
>AUT-400252370
AAGGAAGCTCTATTGGATACAGGAGCAGATGATACAGTATTAGAAGACATGAATTTGCCAGGAAGATGGAAACCAAAAATGATAGGGGGAATTGGAGGATTTATCAAAGTAAGACAGTATGATCAGATACCTTTAGAAATCTGTGGACATAAAGCTATAGGTACAGTGTTAGTAGGACCTACACCTGTCAACATAATTGGAAGAAATCTGTTGACTCAAATTGGTTGCACTTTAAATTTTGAAATGGAAAAGGAAGGAAAAATTTCAAAAATTGGGCCTGAAAATCCATACAATACTCCAATATTTGCCATAAAGAAAAAAGACAGTACTAAATGGAGAAAATTAGTAGATTTCAGAGAACTTAAGAGAACTCAAGATTTCTGGGAAGTTCAATTAGGA…
>AUT-400252767
AAAGAAGCTCTATTAGATACAGGAGCTGATGATACAGTATTAGAAGAAATGAGTTTGCCAGGAAGATGGAAACCAAGAATGATAGGGGGAATTGGAGGTTTTATCAAAGTAAGACAGTATGATCAGGTAATCATAGAGATCTGTGGACATAAAGCTGTAGGTACAGTATTAGTAGGACCTACACCTGTCAACATAATTGGAAGAAATCTGTTGACACAGCTTGGTTGCACTTTAAATTTTGAAATGGAAAAGGAAGGAAAAATTTCAAAAATTGGGCCTGAAAATCCATACAATACTCCAGTATTTGCCATAAAGAAAAAAGACAGTACTAAATGGAGAAAATTAGTAGATTTCAGAGAACTTAAGAAAACTCAAGACTTCTGGGAAGTTCAATTAGGA…
>AUT-400252769
AAGGAAGCTCTATTAGACACAGGAGCAGATGATACAGTATTAGAAGACATAAATTTACCAGGGAAATGGAAACCAAAAATGATAGGGGGAATTGGAGGTTTTATCAAAGTAAAACAGTATGATAACATAACTATAGACATTTGTGGACACAAGGCTATAGGTACAGTGTTGATAGGACCTACGCCTGTCAACATAATTGGAAGAAATATGTTGACTCAGCTTGGTTGTACATTAAATTTTGACATGGAAAAGGAAGGAAAAATTTCAAGAGTTGGGCCGGAAAATCCATACAATACTCCAGTATTTGCTATAAAGAAAAAAGACAGTACTAAATGGAGAAAATTAGTAGATTTCAGAGAACTTAAAAGAACTCAAGATTTTTGGGAGGTTCAATTAGGA…
>AUT-400252771
ATAGAAGCCCTATTAGATACAGGAGCAGATGATACAGTATTAGAACAAATAGAGTTACCAGGAAAATGGAAACCAAAAATGATAGGGGGAATTGGAGGATTTATCAAAGTAAAACAATATGATCAAATACCTATGGAAATTGAGGGGAAAAAGGCTATAGGGACAGTATTAGTAGGACCTACACCTATCAACATAATTGGAAGAAATATGTTGACTCAGATTGGTTGTACTTTAAATTTTGAAATGGAAAAGGAAGGGAAAATTTCAAAAATTGGGCCTGAAAATCCATATAACACYCCAATATTTGCYATAAAGAAAAARGACAGTACTAAATGGAGAAAATTGGTAGATTTCAGAGAGCTCAAAAGAACTCAAGACTTCTGGGAGGTCCAATTRGGT…
>AUT-400252999
AAAGAAGCTTTATTAGATACAGGAGCAGATGATACAGTATTAGAAGAAATGAATTTGCCAGGAAGATGGAAACCAAAAATGATAGGGGGAATTGGAGGTTTTATCAAAGTAAGGCAGTATGATCAGATACTCATAGAAATTTGTGGACATAAAGCTATAGGTACAGTATTAATAGGACCTACACCTGTCAACATAATTGGAAGAAACCTRTTGACTCAGATCGGCTGCACTTTAAATTTTGAAATGGAAAAGGAAGGAAAAATTTCAAAAATTGGGCCTGAAAATCCATACAATACTCCAATATTTGCCATAAAGAAAAAAGACAGTACTAAATGGAGAAAATTAGTAGATTTCAGAGAACTTAAGAGAACTCAAGACTTCTGGGAAGTTCAATTAGGA…
>AUT-400255087
AAGGAAGCTCTATTAGATACAGGAGCAGATGATACAGTAGTAGAAGAAATGAATTTGCCAGGAAAATGGARGCCAAAAATGATAGGGGGAATTGGAGGTTTTATCAAAGTAAGACAGTATGATCAAGTACACATAGAAATCTGTGGAAATAAAGTTATGGGTACAGTATTAGTAGGACCTACACCTGTCAACATAATTGGAAGAAATCTGTTGACTCAGCTTGGTTGCACTTTAAATTTTGAAATGGAAAAGGAAGGGAAAATTTCAAAAATTGGGCCTGAGAATCCATATAATACTCCAGTGTTTGCTATAAAGAAAAAAGACAGTACTAAATGGAGAAAATTAGTAGATTTCAGAGAACTTAAGAAAACTCAAGAYTTCTGGGAAGTTCAATTAGGA…
>AUT-400255926
AAGGAAGCTCTATTAGATACAGGAGCAGATGATACAGTGTTAGAAGAAATRAATTTGCCAGGAAGATGGAAACCAAAAATGATAGGGGGAATTGGAGGTTTTATCAAAGTAAGACAGTATGATCAGGTACCCATAGAAATCTGTGGGCATAAAGCTATAGGTACAGTATTAGTAGGACCTACACCTGTTAACATAATTGGAAGAAATCTGTTAACTCAGATAGGTTGCACTTTAAATTTTGAGATGGAAAAGGAAGGAAAAATTTCAAAAATTGGGCCTGAAAATCCATACAAYACTCCAGTATTTGCCATAAAGAAAAAAGACAGTACTAAATGGAGAAAATTAGTAGATTTCAGAGAACTTAAGAGAACTCAAGACTTCTGGGAAGTTCAATTAGGA…
>AUT-400256332
AAAGAAGCTCTATTAGATACAGGAGCAGATGATACAGTATTAGAAGAAATAAATTTGCCAGGAAGATGGAAACCAAAAATGATAGGGGGAATTGGAGGTTTTATCAAAGTCAGACAGTATGATCAGGTACCCATAGAGATTTGTGGACATAAGGCTATAGGTACAGTATTAGTAGGACCTACACCTGTCAACATAATTGGAAGAAATTTGTTGACTCAGATTGGCTGCACTCTAAATTTTGAAATGGAGAAGGAAGGAAAAATTTCAAGAATTGGGCCTGAAAATCCATACAATACTCCAGTATTTGCCATAAAGAAAAAAGACAGTACTAAATGGAGGAAATTAGTAGATTTCAGAGAACTTAAGAAAACTCAAGACTTCTGGGAAGTCCAACTAGGG…
>AUT-400257188
AAAGAGGCTCTCTTAGACACAGGRGCAGATGATACAGTATTAGAAGAAATAAATTTGCCAGGAAGATGGAAACCAAAAATGATAGGAGGAATTGGAGGTTTTATCAAAGTAAGACAATATGATCAAATACCTATAGAAATTTGTGGGAAAAAGGCTATAGGTACAGTATTAGTAGGACCCACACCTGTCAACATAATTGGAAGAAACATGTTGACTCAGCTTGGRTGCACACTAAATTTTGAAATGGAGAAGGAAGGAAAAATTACAAAARTTGGGCCTGAAAATCCATATAACACTCCAATATTTGCCATAAAAAAGAAGGACAGYACTAAGTGGAGAAAATTAGTAGATTTCAGGGAACTCAAAAGAACTCAAGATTTTTGGGAAGTTCAATTAGGA…
>AUT-400258198
AAGGAAGCTCTATTAGATACAGGAGCAGATGATACAGTATTAGAAGAAATAAATTTGCCAGGAAGATGGAAACCAAAAATGATAGGGGGAATTGGAGGTTTTATCAAAGTAAGACAGTATGATCAAATACTCGTAGAAATCTGTGGAAAGAAAGCTATAGGTACAGTATTAGTAGGACCTACACCTGTCAACATAATTGGAAGAAATCTGTTGACTCAGATTGGCTGCACTTTAAATTTTGAAATGGAAAAGGAAGGGAAAATTTCCAAAATTGGGCCTGAAAATCCATATAATACTCCAGTATTTGCCATAAAGAAAAAAGACAGTACTAAATGGAGAAAATTAGTAGATTTTAGAGAACTTAAAAGAACTCAAGATTTCTGGGAARTTCAATTAGGA…
>AUT-400258591
AAGGAAGCTCTATTAGATACAGGAGCAGATGATACAGTATTAGAAGAAGTGAATTTGCCAGGAAGATGGAAACCAAAAATGATAGGGGGAATTGGAGGTTTTATCAAAGTAAGACAGTATGAACAGATACCCATAGAAATTTGTGGACATAAAGCTATAGGTACAGTATTAGTAGGACCTACACCTGTCAACATAATTGGAAGAAACCTGTTGACCCAGATTGGTTGCACTTTAAATTTTGAGATGGAAAAGGAAGGAAAAATCTCAAAAATTGGACCTGAAAATCCATATAATACTCCAGTATTTGCCATAAAGAAAAAGGACAGTACTAAATGGCGAAAATTAGTAGATTTCAGAGAACTTAAGAGGACTCAAGACTTCTGGGAAGTTCAATTAGGA…
>AUT-400258915
AAAGAAGCTCTATTAGATACAGGAGCAGATGATACAGTATTAGAAGAAATAAATTTGCCAGGAAGATGGAAACCAAAAATGATAGGGGGAATTGGAGGTTTTATCAAAGTCAGACAGTATGATCAGGTACCCATAGAGATTTGTGGACATAAGGCTATAGGTACAGTATTAGTAGGACCTACACCTGTCAACATAATTGGAAGAAATTTGTTGACTCAGATTGGCTGCACTCTAAATTTTGAAATGGAGAAGGAAGGAAAAATTTCAAGAATTGGGCCTGAAAATCCATACAATACTCCAGTATTTGCCATAAAGAAAAAAGACAGTACTAAATGGAGGAAATTAGTAGATTTCAGAGAACTTAAGAAAACTCAAGACTTCTGGGAAGTCCAACTAGGG…
>AUT-400259098
AAGGAAGCTCTATTAGATACAGGAGCAGATGATACAGTATTAGAAGAAATGAGTCTGCCAGGAAGATGGAAACCAAAAATGATAGGGGGAATTGGAGGTTTTATCAAAGTAAAACAGTATGATCAGGTACCAATAGAAATCTGTGGACATAAAGCTATAGGTACAGTATTAGTAGGACCTACACCTGTCAACATAATTGGGAGAAATCTGTTGACTCAGCTTGGSTGCACTTTAAATTTTGAAATGGAAAAGGAAGGAAAAATTTCAAAGATTGGGCCTGAAAATCCATACAATACTCCAGTATTTGCCATAAAGAAAAAAGACAGTACTAAATGGAGAAAATTAGTAGATTTCAGAGAACTTAAGAGAACTCAAGACTTCTGGGAAGTTCAATTGGGA…
>AUT-400259815
AAGGAAGCTCTATTAGATACAGGAGCAGATGATACAGTATTAGAAGAAATGAATTTGCCAGGAAGATGGAAACCAAAAATGATAGGGGGAATTGGAGGTTTTATCAAAGTAAGACAGTATGATCAGGTACCCATAGAAATCTGTGGACATAAAGCTATAGGTACAGTATTAATAGGACCTACACCTGTCAACATAATTGGAAGAAATCTGTTGACTCAGCTTGGTTGCACTTTAAATTTTGAAATGGAAAAGGAAGGAAAAATTTCAAAAATTGGGCCTGAAAATCCATACAACACTCCAGTATTTGCCATAAAGAAAAAAGACAGTACTAAATGGAGAAAATTAGTAGATTTTAGAGAACTTAAGAGAACTCAAGACTTCTGGGAAGTTCAATTAGGA…
>AUT-400261215
AAGGAAGCTCTATTAGATACAGGAGCAGATGATACAGTATTAGAAGACATGATTTTGCCAGGAAGATGGAAACCAAAAATGATAGGGGGAATTGGAGGTTTTATCAAAGTAAGACAGTATGATCAGGTATCCATAGAAATCTGTGGAAATAAAGTTATAGGTACAGTATTAGTAGGACCTACACCAGTCAACATAATTGGGAGAAATCTGTTGACTCAGCTTGGTTGCACTTTAAATTTTGAAATGGAAAAGGAAGGAAAAATTTCAAAAATTGGGCCTGAAAATCCATACAATACTCCAGTATTTGCCATAAAGAAAAAAGACAGTACTAAATGGAGAAAATTAGTAGATTTCAGGGAACTTAAGAAAACTCAAGACTTCTGGGAAGTTCAACTAGGG…
>AUT-400261397
AAGGAAGCTCTATTAGATACAGGAGCAGATGATACAGTATTAGAAGAAATGACTTTACCAGGAAGATGGAAACCAAAAATGATAGGGGGAATTGGAGGGTTTATCAAGGTAAGACAGTATGATCAGGTACCCATAGAAATCTGTGGGCATAAAGCTGTAGGTACAGTATTAATAGGACCTACACCTGTCAACATAATTGGAAGAAATCTGTTGACTCAGCTTGGTTGCACTTTAAATTTTGAAATGGAAAAGGAAGGAAAAATTTCAAAAATTGGGCCTGAAAATCCGTACAATACTCCAGTGTTTGCCATAAAGAAAAAAGACAGTACCAAATGGAGAAAATTAGTAGATTTTAGAGAACTTAAGAGAACTCAAGACTTCTGGGAGGTTCAATTAGGA…
>AUT-400261398
AAAGAAGCTCTATTAGATACAGGAGCAGATGATACAGTATTAGAAGACATAAATTTGCCAGGAAAATGGARACCAAAAATGATAGGGGGAATTGGAGGGTTTATCAAGGTAAAACAGTATGATCAGATACAGATAGAAATTTGTGGAAAAAAGGCTATAGGTACAGTATTRGTAGGACCTACACCTGTCAACATAATTGGAAGAAATATGTTGACCCAGATTGGCTGTACTTTAAATTTTGAGATGGAAAAGGAAGGGAAAATATCAAAAATTGGGCCTGAAAATCCATATAATACTCCAATATTTGCTATAAAGAGAAAAGACAGCACTAAATGGAGAAAATTAGTAGATTTCAGAGAGCTCAAAAGAACTCAAGACTTTTGGGAAGTTCAATTAGGA…
>AUT-400262893
AAGGAAGCTCTGCTAGATACAGGAGCAGATGACACAGTATTAGAAGAAATAAATTTGCCAGGAAGATGGAAACCAAAAATGATAGGGGGAATTGGAGGTTTTATCAAGGTAAGACAGTATGATCAGATACCCATAGAAATCTGCGGACATAAAGCTATAGGTACAGTATTAGTAGGACCTACACCTGTCAACATAATTGGAAGAAATCTGTTGACCCAGATTGGTTGCACTCTAAATTTTGAAYTGGAAAAGGAAGGAAAAATTTCAAGAATTGGGCCTGAAAATCCATACAATACTCCAGTATTTGCCATAAAGAAGAAAGACAGTACTAAATGGAGAAAATTAGTAGATTTCAGAGAACTTAAGAGAACTCAAGACTTCTGGGAAGTTCAATTAGGA…
>AUT-400262894
AAGGAAGCTCTATTAGATACAGGAGCAGATGATACAGTATTAGAAGATATGGATTTGCCAGGAAGATGGAAACCAAAAATGATAGGGGGAATTGGAGGTTTTATCAAAGTAAAACAGTATGATCAGGTASAMGTAGAAATCTGTGGAAAGAAAACTATAGGTAAAGTATTAATAGGACCTACACCTGTCAACATAATTGGAAGAAATCTGTTGACTCAGCTTGGTTGCACTTTAAATTTTGAAATGGAAAAGGAAGGGAAAATTTCAAAAATTGGGCCTGAAAACCCATATAATACTCCAATATTTGCCATAAAGAAAAAAGACAGTACTAAATGGAGAAAATTAGTAGATTTCAGAGAACTTAAGAAAACTCAAGACTTCTGGGAAGTTCAATTAGGA…
>AUT-400263185
AAAGAAGCTCTATTAGATACAGGAGCAGATGATACAGTATTAGAAGACATAAATTTGCCAGGAAAATGGAAACCAAAAATGATAGGGGGAATTGGGGGTTTTATCAAGGTAAGACAGTATGATCAGATACTTATAGAAATTTGTGGAAAAAAGGCTATAGGTACAGTATTAGTAGGACCTACTCCTGTCAACATAATTGGAAGAAATATGTTGACTCAGCTTGGTTGTACCTTAAATTTTGAAATGGAAAAGGAAGGAAAAATTTCAAAAATTGGGCCTGAAAATCCATACAATACTCCAGTATTTGCTATAAAGAAAAAGGACAGCACTAAGTGGAGAAAATTAGTAGATTTCAGGGAGCTCAAAAGAACTCAGGACTTTTGGGAAGTTCAATTAGGA…
>AUT-400263913
AAGGAAGCTCTATTAGATACAGGAGCAGATGATACAGTATTAGAAGAAATGAATTTGCAAGGAAGATGGAAACCAAAAATGATAGGGGGAATTGGAGGTTTTATCAAAGTAAAACAATATGATCAGGTACAACTAGAAATTTGTGGACATAAAGTTATAGGTACAGTATTAGTAGGACCTACACCTGTCAACATAATTGGAAGAAACTTGTTGACTCAGCTTGGCTGTACTTTAAACTTTGAGATGGAAAAGGAAGGAAAAATTTCAAAAATTGGGCCTGAAAATCCATACAATACTCCAATATTTGCCATAAAGAAAAAAGACAGTACCAAATGGAGAAAATTAGTAGATTTCAGAGAACTTAAGAGAACTCAAGATTTCTGGGAAGTTCAATTAGGG…
>AUT-400264301
AAAGAAGCTCTATTAGATACAGGAGCAGATGATACAGTGTTAGAAGAAATAGATTTGCCAGGAARATGGAAACCAAAAATGATAGGGGGAATTGGAGGTTTTATCAAAGTTAGGCAATATGATCAGATACTTATAGAAATTTGTGGAAAAAAGGCTATAGGTACAGTGTTAGTAGGACCTACACCTGTCAACATAATTGGGCGAAATATGTTGACTCAGATTGGTTGTACTTTAAA-TTTGAAATGGAARAGGAAGGAAAAATCTCAAAAATTGGGCCTGAGAATCCATACAATACTCCAGTATTTGCTATAAAGAAAAAGGATAGCACCAAATGGAGGAAATTAGTAGATTTCAGAGAGCTCAAAAGGACTCAGGACTTTTGGGAAGTTCAATTAGGA…
>AUT-400264302
AAAGAAGCTCTATTAGATACAGGAGCAGATGATACAGTATTAGAAGATATAAATTTGCCAGGAAAATGGAAACCAAAAATGATAGGGGGAATTGGAGGTTTTATCAAAGTTAGGCAATATGATCAGATACTTATAGAAATTTGTGGAAAAAAGGCTATAGGTACAGTGTTAGTAGGACCTACACCTGTCAACATAATTGGACGAAATATGTTGACTCAGATTGGTTGTACTTTAAA-TTTGAAATGGAAGAGGAAGGAAAAATCTCAAAAATTGGGCCTGAGAATCCATACAATACTCCAATATTTGCTATAAAGAAAAAGGATAGCACCAAATGGAGGAAATTAGTAGAYTTCAGAGAGCTCAAAAGGACTCAGGACTTTTGGGAAGTTCAATTAGGA…
>AUT-400264514
AAGGAAGCTCTATTAGATACAGGAGCAGATGATACAGTATTAGAAGACATAGATTTRCCAGGAAGATGGAAACCAAAAATGATAGGGGGAATTGGAGGTTTTATCAAAGTAAGACAGTATGATCAGGTACCCATAGAAATCTGTGGACATAAAGYTATAGGTACAGTATTAGTAGGACCTACACCAGTCAACATAATTGGGAGAAATCTGTTGACTCAGCTTGGTTGCACTTTAAATTTTGAAATGGAAAAGGAAGGAAAAATTTCAAAAATTGGGCCTGAAAATCCATACAATACTCCAGTATTTGCCATAAAGAAAAAGGACAGTACTAAATGGAGAAAATTAGTAGATTTCAGGGAACTTAAGAAAACTCAAGACTTCTGGGAAGTTCAACTAGGG…
>AUT-400265295
AAGGAAGCTCTATTAGATACAGGAGCAGATGATACAGTATTAGAAGAAATGRSTTTGCCAGGAAGATGGAAACCAAAAATGATAGGGGGAATTGGAGGTTTTATCAAAGTAAGACAGTATGATCAAATACCCATAGAAATCTGTGGACATAAAGCTATAGGTACAGTATTAGTAGGACCTACACCTGTCAACATAATTGGAAGAAATCTGTTGACTCAGATTGGTTGTACTTTAAATTTTGAAATGGAAAAGGAAGGGAAAATTTCAAAAATTGGGCCTGAAAATCCATATAATACTCCAGTATTTGCTATAAAGAAGAAAGACAGTACTAAATGGAGAAAATTAGTAGATTTCAGAGAACTTAAAAGAACTCAAGACTTYTGGGAAGTTCAATTAGGA…
>AUT-400265461
AAGGAAGCTCTATTAGATACAGGAGCAGATGATACAGTATTAGAAGAAATGAGTTTGCCAGGAAGATGGAAACCAAAAATGATAGGGGGAATTGGAGGTTTTATCAAAGTAAGACAGTATGATCAGATACCAATAGAAATCTGTGGACATAAAGCTATAGGTACAGTATTAATAGGACCTACACCTGTCAACATAATTGGGAGAAATCTGTTGACTCAGCTTGGATGCACTTTAAATTTTGAAATGGAAAAGGAAGGAAAAATTTCAAAGATTGGGCCTGAAAATCCATACAATACTCCAGTATTTGCCATAAAGAAAAAAGACAGTACTAAATGGAGAAAATTAGTAGATTTCAGAGAACTTAAGAGAACTCAAGACTTCTGGGAAGTTCAATTGGGA…
>AUT-400265553
AAGGAAGCTCTATTAGATACAGGAGCAGATGATACAGTATTAGAAGAAATGARTTTGCCAGGAARATGGAAACCAAAAATGATAGGGGGAATTGGAGGTTTTATMAAAGTAAGACAATATGATCAGGTAWMCATAGAAATCTGTGGACATAAAGCTRTAGGTACAGTATTAATAGGACCTACACCTGTCAACATAATTGGAAGAAATCTGTTGACTCARMTTGGTTGCACTTTAAATTTTGAAATGGAAAAGGAAGGAAARATTTCAAAAATTGGGCCTGAAAATCCATACAATACTCCAGTATTTGCCATAAAGAAAAAAGACAGTACTAAATGGAGAAAATTAGTAGATTTCAGAGAACTTAAGAGAACTCAAGACTTCTGGGAAGTCCAACTAGGA…
>AUT-400265556
AAGGAAGCTCTATTAGATACAGGAGCAGATGATACAGTATTAGAAGAAATGACTTTGCCAGGGAAATGGAAACCAAAAATGATAGGGGGAATTGGAGGTTTTATCAAAGTAAGACAGTATGATCAAATACCCATAGAAATCTGTGGAAATAAAGCTATAGGTACAGTATTAGTAGGACCTACACCTGTCAACATAATTGGAAGAAATCTGTTGACTCAGATTGGTTGCACTTTAAATTTTGAAATGGAAAAGGAAGGGAAAATTTCAAAAATTGGGCCTGAAAATCCATATAATACTCCAGTATTTGCTATAAAGAAAAAAGACAGTACTAAATGGAGAAAATTRGTAGATTTCAGAGAACTTAAGAGAACTCAAGACTTCTGGGAAGTTCAATTAGGA…
>AUT-400267305
AAGGAAGCTCTATTAGATACAGGAGCAGATGATACAGTATTAGAAGACATGGAGTTGCCAGGAAGATGGAAACCAAAAATGATAGGGGGAATTGGAGGTTTTATCAAAGTAAGACAGTATGAGCAGACAACTGTAGAAATTTGTGGATATAAAACTATAGGTACAGTGTTAATAGGACCTACCCCTGTCAACATAATTGGAAGAAATCTGTTAACTCAGCTTGGTTGCACTTTAAATTTTGAAATGGAAAAGGAAGGAAAAATTTCAAAAATTGGGCCTGAAAATCCATACAATACTCCAGTATTTGCCATAAAGAAAAAAGACAGTACTAAATGGAGAAAACTAGTAGATTTCAGAGAACTTAAGAGAACACAAGACTTCTGGGAAGTTCAATTAGGA…
>AUT-400267306
ATAGAAGCCCTATTAGATACAGGAGCAGATGATACAGTATTAGAAAACATAGAGTTACCAGGAAGATGGAAACCAAAAATGATAGGGGGAATTGGAGGTTTTATCAAAGTAAGACAATATGATCAGATACATATAGAAATTTGTGGGAAAGAAGCCATAGGTACAGTATTAGTAGGACCTACACCTGTCAACATAATTGGGCGAAATATGTTGACTCAGATTGGTTGTACTTTAAATTTTGAGATGGAAAAGGAAGGAAAAATTTCAAAAATTGGGCCTGAAAATCCATACAATACTCCAGTATTTGCCATAAAGAAAAAAGATAGTACTAAATGGAGAAAATTAGTAGATTTCAGAGAACTCAAAAGAACTCAAGACTTCTGGGAGGTCCAATTAGGA…
>AUT-400267653
AAAGAAGCTCTATTAGATACAGGAGCAGATGATACAGTATTAGAAGACATAAATTTGCCAGGAAAATGGAAACCAAAAATGATAGGGGGAATTGGAGGTTTTATCAAAGTAAGACAGTATGATCAGRTAYCTATAGAAATTTGTGGAAAAAAGGCTATAGGTACAGTATTAGTAGGACCTACCCCTGTCAACATAATTGGAAGAAATATGTTGACTCAGCTTGGTTGTACTTTAAATTTTGAGATGGAAAAGGAAGGAAAAATTTCAAAAATTGGGCCTGAAAATCCATACAATACTCCAGTATTTGTTATCAAGAAAAAGGACAGCACTAAGTGGAGGAAATTAGTAGATTTCAGGGAGCTCAAAAGAACTCAGGACTTTTGGGAAGTTCAATTAGGA…
>AUT-400267654
AAAGAAGCTCTATTAGATACAGGAGCAGATGATACAGTATTAGAAGAAATGAGTTTGCCAGGAAGATGGAAACCAAAAATGATAGGGGGAATTGGAGGTTTTATCAAAGTAAGACAGTATGATCAGATACTCATAGAGATCTGTGGACATAAAGCTATAGGTACAGTATTAGTAGGACCTACACCTGTCAACATAATTGGAAGAAACCTGTTGACTCAGATTGGCTGCACTTTAAAWTTTGAAATGGAAAAGGAAGGAAAAATTTCAAAAATTGGGCCTGAAAATCCATACAATACTCCAGTATTTGCCATAAAGAAAAAAGACAGTACTAAATGGAGAAAATTAGTAGACTTCAGAGAACTTAAGAGAACTCAAGACTTCTGGGAAGTTCAATTAGGA…
>AUT-400267711
AAGGAAGCTCTATTAGATACAGGAGCAGATGATACAGTATTAGAAGAYATGAATTTGCCAGGAAGATGGAAACCAAAAATGATAGGGGGAATTGGAGGTTTTATCAAAGTAAGACAGTATGATCAGATACYCATAGAAATCTGTGGACATAAAGCAATAGGTACAGTATTAGTAGGACCTACACCTGTTAACATAATTGGAAGAAATCTGTTAACTCAGATTGGCTGTACTTTAAATTTTGAAATGGAAAAGGAAGGAAAAATTTCAAAAATTGGGCCTGAAAATCCATACAATACTCCAGTATTTGCCATAAAGAAAAAAGACAGTACTAAATGGAGAAAATTAGTAGATTTCAGAGAACTTAAGAGAACTCAAGACTTCTGGGAAGTTCAATTAGGA…
>AUT-400267986
AAGGAAGCTCTATTAGATACAGGAGCAGATGATACAGTATTAGAAGAAATGAATTTACCAGGAAAATGGAAACCAAAAATGATAGGGGGAATTGGAGGTTTTATCAAAGTAAGACAGTATGATCAGATACTCATAGAAATTTGTGGGCATAAAGCTATAGGTACAGTGTTAGTAGGACCTACCCCTGTCAATATAATTGGAAGAAATCTACTGACCCAGCTTGGGTGCACTTTAAATTTTGAAATGGAAAAGGAAGGGAAAATTTCAAAAATTGGGCCTGAAAATCCATATAATACTCCAGTGTTTGCTATAAAGAAAAAGGACAGTACTAAATGGAGAAAATTAGTAGATTTTAGAGAACTTAAGAGAACTCAAGACTTCTGGGAAGTGCAATTAGGA…
>AUT-400268701
AAGGAAGCTCTATTAGATACAGGAGCAGATGATACAGTATTAGAAGAAATGAATTTGCCAGGAAGATGGAAACCAAAAATGATAGGGGGAATTGGAGGTTTTATCAAAGTAAGACAGTATGATCAGATAGCCATAGAAATTTGTGGACATAAAGCTATAGGTACAGTGTTAGTAGGACCTACACCTGTCAACATAATTGGAAGAAATCTGTTGACTCAGATTGGTTGCACTTTAAATTTTGAAATGGAAAAAGAAGGGAAAATATCTAAAATTGGGCCTGAAAATCCATATAATACTCCAGTATTTGCCATAAAGAAAAAAGACAGTACTAAATGGAGAAAATTAGTAGACTTCAGAGAACTTAAGAGAACTCAAGATTTCTGGGAAGTTCAATTAGGA…
>AUT-400269098
AAAGAAGCTCTATTAGATACAGGAGCAGATGATACAGTATTAGAGGATATAAATTTGCCAGGAAAATGGAAACCAAAAATGATAGGGGGAATTGGAGGTTTTATCAAAGTAAGGCAATATGATCAAATACTTATAGAAATTTGTGGAAAAAAAGCTATAGGCACAGTGTTAGTAGGACCTACACCTATCAACATAATTGGACGAAATATGTTGACTCAGATTGGTTGTACTTTAAATTTTGAGATGGAAGAGGAAGGAAAAATCTCAAAAATTGGGCCTGAAAATCCATACAATACTCCAGTATTTGCTATAAAGAAAAAGGACAGCACCAAATGGAGGAAATTAGTAGATTTCAGAGAACTCAAAAGAACTCAGGACTTCTGGGAAGTTCAATTAGGA…
>AUT-400269516
AAAGAAGCTCTATTAGATACAGGAGCAGATGATACAGTATTAGAAGACATAAATTTGACAGGAAAATGGAAGCCAAGAATGATAGGGGGAATTGGAGGGTTTATCAAAGTAAAACAGTATGATAACATAACCATAGATATTTGTGGACATAAAGCTATAGGTACAGTGTTAGTAGGACCTACACCTGTCAACATAATTGGAAGAAATATGTTGACTCAGATTGGTTGCACTCTAAATTTTGAAATGGAGAAAGAAGGAAAAATTTCAAAAATTGGGCCTGAAAATCCATACAATACTCCAATATTTGCCATAAAGAAAAAAGACAGCACTAAATGGAGAAAATTAGTAGATTTTAGAGAACTTAAAAGAACTCAGGATTTTTGGGAAGTTCAATTAGGA…
>AUT-400269517
AAGGAAGCTCTATTAGATACAGGAGCAGATGATACAGTATTAGAAGACATGGATTTGCCAGGAAGATGGAAACCAAAAATGATAGGGGGAATTGGAGGTTTTATCAAAGTAAGACAGTATGATCAGGTACCCATGGAAATCTGTGGGCATAAAGCTATAGGTACAGTCTTAGTAGGACCTACACCTGTCAACATAATTGGAAGAAATCTGTTGACACAAATTGGATGCACTTTAAATTTCGAAATGGAAAAGGAAGGAAAAATTTCAAAAATTGGGCCTGAAAATCCATAYAATACTCCAGTATTTGCCATAAAGAAAAAAGACAGTACTAAATGGAGAAAATTAGTAGATTTTAGAGAACTTAAGAAAACTCAAGACTTCTGGGAAGTTCAATTAGGA…
>AUT-400269564
ATAGAAGCCCTGTTAGACACAGGAGCTGATGATACAGTATTAGAAGAAATAAATTTACCAGGAAAATGGAAACCAAAAATGATAGGGGGAATTGGAGGTTTTATCAAAGTAAGACAGTATGATCAGATACCTTTAGAAATTTGTGGAAAAAGGGCCATAGGTACGGTATTAGTAGGACCTACGCCTGTCAACATAATTGGACGAAATATGTTGACTCAGATTGGTTGTACTTTAAATTTTGATATGGAAAARGAAGGGAAAATTTCAAAAATTGGGCCTGAAAATCCATACAATACTCCAGTATTTGCCATAAAGAAAAAAGATAGTACTAAATGGAGAAAATTAGTAGATTTCAGAGAACTTAAAAGAACTCAAGACTTCTGGGAGGTCCAATTAGGA…
>AUT-400270151
AAGGAAGCTCTATTAGACACAGGAGCAGATGATACAGTATTAGAAGACATAAATTTACCAGGAAAATGGAAACCAAAAATGATAGGGGGAATTGGAGGTTTTATCAAAGTAAAACAGTATGATAACATAGCCATAGACATTTGTGGACACAAGGCTATAGGTACAGTGTTGATAGGACCTACACCTGTCAACATAATTGGAAGAAACATGTTGACTCAGATTGGTTGTACATTAAATTTTGACATGGAAAAGGAAGGAAAAATTTCAAAAATTGGGCCTGAAAATCCATACAATACTCCAGTATTTGCCATAAAGAAAAAAGACAGTACTAAATGGAGAAAATTAGTAGATTTCAGAGAACTTAAAAGAACTCAAGATTTTTGGGAGGTTCAATTAGGA…
>AUT-400271517
AAAGAGGCTCTCTTAGATACAGGAGCAGATGATACAGTATTAGAAGATATAAATTTGCCAGGAAAATGGAAACCAAAAATGATAGGAGGAATTGGAGGTTTTATCAAAGTAAGACAATATGATCAAATACTTATAGAAATTTGTGGAAAAAAGGCTATAGGTACAGTATTAGTAGGGCCTACACCTGTCAACATAATTGGAAGAAACATGTTGACTCAGCTTGGCTGCACACTAAATTTTGAAATGGAGAAGGAAGGAAAAATTACAAAAATTGGGCCTGAAAATCCATATAATACTCCAATATTTGCCATAAAAAAGAAGGACAGTACTAAGTGGAGAAAATTAGTAGATTTCAGGGAACTTAAAAGAACTCAAGACTTTTGGGAAGTTCAATTAGGA…
>AUT-400271518
AAGGAAGCTCTATTAGATACAGGAGCGGATGATACAGTATTAGAAGATATGGATTTGCCAGGAAGATGGAAACCAAAAATGATAGGGGGAATTGGAGGTTTTATCAAAGTAAGACAGTATGATCAGATACCCTTAGAAATCTGTGGACATAAAGCTATCGGTACAGTATTAGTAGGACCCACACCTGTTAACATAATTGGAAGAAACCTGTTGACGCAGATTGGTTGCACTTTAAATTTTGAAATGGAAAAAGAAGGAAAAATTTCAAAAATTGGGCCTGAAAATCCATATAATACTCCAATATTTGCCATAAAGAAAAAAGATAGTACTAAATGGAGAAAATTAGTAGATTTTAGAGAACTTAAGAAAACTCAAGACTTCTGGGAAGTTCAATTAGGA…
>AUT-400271914
AAGGAAGCTCTATTAGATACAGGAGCAGATGATACAGTATTAGAAGAAATRARTTTGYCAGGAAGATGGAAACCAARAATGATAGGGGGAATTGGAGGTTTTATCAAAGTRAGACAGTATGATCAGRTAACCRTAGACATCTGTGGACATAAAGYTGTAGGTACAGTATTAATAGGACCTACACCTGTCAACATAATTGGAAGAAATCTGTTGACTMARMTTGGCTGCACTTTAAATTTCGAAATGGAAAAGGAAGGAAAAATTTCAAAAATTGGGCCTGAAAATCCATACAATACTCCAGTATTTGCCATAAAGAAAAAAGACAGTAMTAAATGGAGAAAATTAGTAGATTTCAGAGAACTTAAGAGAACTCAAGAYTTCTGGGAAGTTCAACTAGGA…
>AUT-400271915
AAGGAAGCTCTATTAGATACAGGAGCAGATGATACAGTATTAGAAGAAATGAATTTGCCAGGAAGATGGAAACCAAAAATGATAGGGGGAATTGGAGGTTTTATCAAAGTAAGACAGTATGATCAGATAGCCATAGAAATTTGYGGACATAAAGCTATAGGTACAGTGTTAGTAGGAGCTACACCTRTCAACATAATTGGAAGAAATCTGTTGACTCAGATTGGWTGCACTCTAAATTTTGAAATGGAAAAGGAAGGRAAAATTTCAAAAATTGGGCCTGAAAATCCATACAATACTCCAGTATTTGCCATAAAGAAAAAAGACAGTACTAAATGGAGAAAATTAGTAGATTTTAGAGAACTTAAAAGAACTCAAGACTTCTGGGAAGTTCAATTAGGA…
>AUT-400272501
AAAGAAGCTCTATTAGATACAGGAGCAGATGATACTGTATTAGAAGACATAAATTTGCCAGGAAAATGGAAACCAAAAATGATAGGGGGAATTGGAGGTTTTATCAAAGTAAGACAGTATGATCAGRTACTTATAGAAATTTGTGGAAAAAAGGCTATAGGTACRGTATTARTAGGGCCYACCCCTGTCAACATAATTGGAAGAAAYATGTTGACTCAGMTTGGTTGTACTTTAAATTTTGARATGGAAAAGGAAGGAAAAATTTCAAAAATTGGGCCTGAAAATCCATACAATACTCCAGTATTTGCTATAAAGAAAAAAGAYAGCACTAAGTGGAGRAAATTAGTAGATTTYAGGGARCTCAAAAGAACTCAGGACTTTTGGGAAGTTCAATTAGGA…
>AUT-400274399
AAGGAAGCTCTATTAGATACAGGAGCAGATGATACAGTATTAGAAGAAATGAGTTTGCCAGGAAGATGGAAACCAAAAATGATAGGGGGAATTGGAGGTTTTATCAAAGTAAAACAGTATGATCAGATACCAATAGAAATCTGTGGACATAAAGTTATAGGTACAGTATTAATAGGATCTACACCTGTCAACATAATTGGGAGAAATCTGTTGACTCAGCTTGGATGCACTTTAAATTTTGAAATGGAAAAGGAAGGAAAAATTTCAAAGATTGGGCCTGAAAATCCATACAATACTCCAGTATTTGCCATAAAGAAAAAAGACAGTACTAAATGGAGAAAATTAGTAGATTTCAGAGAACTTAAAAGAACTCAAGACTTCTGGGAAGTTCAATTGGGA…
>AUT-400274462
AAAGAAGCTCTATTAGATACAGGAGCAGATGATACAGTATTAGAAGATATAAATTTGCCAGGGAAATGGAAACCAAAAATGATAGGGGGGATTGGAGGTTTTATCAAAGTAAGGCAATATGATCAGATACCTATAGAAATTTGTGGAAAAAAGGCTATAGGTACAGTATTAGTAGGACCTACACCTGTCAACATAATTGGACGGAATATGTTGACTCTGATTGGTTGTACTTTAAATTTCGAGATGGAARAGGAAGGAAAAATTTCAAAAATTGGGCCTGAAAACCCATACAACACTCCAGTATTTGCTATAAAGAAAAAGGATAGCACCAAATGGAGGAAATTAGTAGATTTCAGAGAGCTCAAAAGAACTCAGGACTTTTGGGAAGTTCAATTAGGA…
>AUT-400275349
AAGGAAGCTCTATTGGATACAGGAGCAGATGATACAGTATTAGAACAAATGGAGTTATCAGGAAGATGGAAACCAAAAATGATAGGGGGAATTGGAGGTTTTATCAAAGTAAAACAATATGATCAGATAACTATAGAAATCTGTGGACATAAAGTCACGGGTACAGTACTAATAGGACCTACACCTGTCAACATAATTGGAAGAAATCTGTTGACACAGCTTGGTTGCACTTTAAATTTTGAAATGGAAAAGGAAGGAAAAATTTCAAAAATTGGGCCTGAAAATCCATACAATACTCCAGTATTTGCTATAAAGAAAAAAGACAGTACTAAATGGAGAAAATTAGTAGATTTYAGAGAACTTAAGAGAACCCAGGACTTCTGGGAAGTTCAATTAGGA…
>AUT-400275984
ATAGAAGCCCTATTAGATACAGGAGCAGATGATACAGTATTAGAACAAATAGATTTACCAGGAAAATGGAAACCAAAAATGATAGGGGGAATTGGAGGATTTATCAAAGTAAAACAGTATGATCAAATACCTATAGAAATTGAGGGAAAAAAGGCTATAGGGACAGTATTAGTAGGACCTACACCTATCAACATAATTGGAAGAAATATGTTAACTCAGATTGGTTGTACTTTAAATTTTGACATGGAAAAGGAAGGGAAAATTTCAAAAATCGGGCCTGAAAATCCATATAACACTCCAATATTTGCCATAAAGAAAAAAGACAGTACTAAATGGAGAAAATTGGTAGATTTCAGAGAACTCAAAAGAACTCAAGACTTCTGGGAGGTCCAATTAGGT…
>AUT-400276719
AGAGAAGCTCTATTAGATACAGGAGCAGATGATACAGTATTAGAAGACATAAATTTGCCAGGAAAATGGACACCAAAAATAATAGGGGGAATTGGAGGTTTTGTCAAAGTAAAACAGTATGATCAGGTACCTATAGAAATCTGTGGACAGAAGGCTATAGGTACAGTATTAGTAGGACCTACACCAGCCAACATAATTGGAAGAAACTTGTTGACCCAGATTGGCTGTACCCTAAATTTTGAACTGGAAAAGGAAGGAAAAATTTCAAGAATTGGGCCTGAAAATCCATATAATACTCCAATATTTGCTATAAAGAAAAAAGACAGTACTAAGTGGAGAAAATTAATGGACTTCAGAGAACTTAAGAGAACTCAAGACTTCTGGGAAGTTCAGTTAGGA…
>AUT-400276741
AAGGAAGCTCTATTAGATACAGGAGCAGATGATACAGTATTAGARGAAATGAATTTGCCAGGAAAATGGAAACCAAAAATGATAGGGGGAATTGGAGGTTTTATCAAAGTAAGACAATATGATCAAATAKCCATAGAAATTTGTGGACATAAAGCTATAGGTACAGTRTTAGTAGGACCTACACCTGTCAACATAATAGGAAGAAATYTGTTGACCCAGMTTGGCTGYACTTTAAATTTTGAAATGGAAAAGGAAGGAAAAATTTCAAAAATTGGGCCTGAAAATCCATACAATACTCCAATATTTGCMATAAAGAAAAAAGAYAGTACYAARTGGAGAAAATTAGTAGATTTCAGRGAACTTAAGAGAACTCAAGATTTCTGGGAAGTTCAATTAGGA…
>AUT-400276822
AGGGAAGCTCTATTAGATACAGGAGCRGATGATACAGTATTAGAAGARATAGATTTGCCAGGAAGATGGAAACCAAAAATGATAGGGGGAATTGGAGGTTTTATCAAAGTAAGACAGTATGATCAAATACCTRTAGAAATCTGTGGAAAGAAAGCTATAGGTACAGTATTAGTAGGACCTACRCCTGTCAACATAATTGGAAGAAATCTGTTGACTCAGCTTGGTTGCACTTTAAATTTTGAAATGGAAAAGGAAGGGAAAATTTCAAAAATTGGGCCTGAAAATCCATATAATACTCCAGTGTTTGCYATAAAGAGAAAAGACARCACTAAATGGAGAAAATTAGTAGATTTTAGAGAACTTAAGAGAACTCAAGACTTCTGGGAAGTTCAATTAGGA…
>AUT-400276903
AAGGAAGCTCTATTAGATACAGGAGCAGATGATACAGTCTTAGAAGACATAAATTTGCCAGGGAAATGGAAACCAAAAATGATAGGGGGAATTGGAGGTTTTATCAAAGTAAAACAGTATGAGGAGATACCCATAGAAATCTGTGGACATAAAGCTATAGGTACAGTTTTAATAGGACCTACACCTGTCAATATAATTGGAAGAAATCTGTTGACTCAGATTGGTTGTACTTTAAATTTTGAAATGGAAAAGGAAGGGAAAATTTCAAGAATTGGGCCTGAGAATCCATACAATACTCCAGTATTTGCCATAAAGAAAAAAGACAGTACTAAATGGAGAAAATTAGTAGATTTCAGAGAACTTAAGAGRACTCAAGATTTCTGGGAAGTTCAATTAGGA…
>AUT-400277024
AAAGAAGCTCTATTAGATACAGGAGCAGATGATACAGTATTAGAAGACATAAATTTGCCAGGGAAATGGAAACCAAAAATGATAGGGGGAATTGGAGGTTTTATCAAAGTAAGACAGTATGATCAGATACTTATAGAAATTTGTGGAAAAAAGGCTATAGGTACAGTATTAGTAGGACCTACCCCTGTCAACATAATTGGAAGAAATATGTTGACTCAGATTGGTTGTACTTTAAATTTTGAGATGGAAAAGGAAGGAAAAATTTCAAAAATTGGGCCTGAAAATCCATACAATACTCCAGTATTTGCTATAAAGAAAAAGGACAGCACTAAGTGGAGGAAATTAGTAGATTTCAGGGAGCTCAAAAGAACTCAGGACTTTTGGGAAGTTCAATTAGGA…
>AUT-400277520
AAGGAGGCTCTCTTAGATACAGGAGCAGATGATACAGTATTAGAAGAAATAAATTTGCCAGGAAAATGGAAACCAAAAATGATAGGAGGAATTGGAGGTTTTATTAAAGTAAGACAGTATGATCAAATAWCTATAGAAATTTGTGGGAAAAAGGCAGTAGGTACAGTACTAGTAGGACCCACACCTGTCAACATAATTGGAAGGAATATGTTGACTCAGCTTGGATGCACACTAAATTTTGAAATGGAAAAGGAAGGAAAAATTTCAAAAGTTGGGCCTGAAAATCCATATAACACTCCRGTATTTGCCATAAAAAAGAAAGACAGTACCAARTGGAGAAAATTAGTAGATTTCAGGGAGCTCAAAAGGACTCAAGACTTCTGGGAAGTTCAATTAGGR…
>AUT-500298732
AAGGAAGCTCTATTAGATACAGGAGCAGATGATACAGTATTARAAGAAATGAGTTTGCCAGGAAGATGGAAACCAAAAATGATAGGGGGAATTGGAGGTTTTATCAAAGTAAAACAGTATGATCAGATACCAATAGAAATCTGTGGACATAAAGCTATAGGTACAGTATTAGTAGGACCTACACCTGTCAACATAATTGGGAGAAATCTGTTGACTCAGCTTGGATGCACTTTAAATTTTGAAATGGAAAAGGAAGGAAAAATTTCAAAGATTGGGCCTGAAAATCCATACAATACTCCAGTATTTGCCATAAAGAAAAAAGACAGTACTAAATGGAGAAAATTAGTAGATTTCAGAGAACTTAAGAGAACTCAAGACTTYTGGGAAGTTCAATTGGGA…
>AUT-500298795
AAGGAAGCTCTATTAGATACAGGAGCAGATGATACAGTATTAGAAGACATGACTTTGCCAGGAAAATGGAAACCAAAAATGATAGGGGGAATTGGAGGTTTTATCAAAGTAAGACAGTATGATCAGATATTAGTAGAGATCTGTGGGCATAAAGCTATAGGTACAGTATTAGTAGGACCTACACCTGTCAACATAATTGGAAGAAATCTGTTGACTCAGATTGGTTGCACTTTAAATTTTGAAATGGAAAAGGAAGGRAAAATTTCAAAAATTGGGCCTGAAAATCCATATAATACTCCAGTATTTGCCATAAAGAAAAAAGACAGTACTAAATGGAGAAAATTAGTAGATTTCAGAGAACTTAAGAGAACTCAAGACTTCTGGGAAATTCAATTAGGA…
>AUT-500298822
AAGGAAGCTCTATTAGATACAGGAGCAGATGATACGGTATTAGAAGAAATGACTTTGCCAGGAAGATGGAAACCAAAAATGATAGGGGGAATTGGAGGTTTTATCAAAGTAAGACAGTATGATCAGGTATCCCTAGAAATCTGTGGACATAAAGCTATAGGTACAGTATTAGTAGGACCTACACCTGTCAACATAATTGGAAGAAATCTGTTGACTCAGCTTGGTTGCACTTTAAATTTTGAAATGGAAAAGGAAGGGAAAATTTCAAAAATTGGGCCTGAAAATCCATACAATACTCCARTATTTGCCATAAAGAAAAAGGACAGCACTAAATGGAGAAAATTAGTAGATTTCAGAGAGCTTAAGAGAACTCAAGACTTCTGGGAAGTTCAATTAGGA…
>AUT-500299041
AAGGAAGCTCTAYTAGATACAGGAGCAGATGATACAGTATTAGAAGAAATGAATTTGCCAGGAAGATGGAAACCAAAAATGATAGGGGGAATTGGAGGCTTTATCAAAGTAAARCAGTATGATCAGATACCCATAGAAATCTGTGGGCATAARGCTATAGGTACAGTATTAATAGGACCTACACCTGTCAACATAATTGGAAGAAATCTGTTGACTCAGCTTGGTTGCACTTTAAATTTTGAAATGGAAAAKGAAGGAAAAATTTCAAGAATTGGGCCTGAAAATCCATACAATACTCCAGTATTTGCCATAAAGAAAAAGGACAGTACTAAATGGAGAAAATTAGTAGATTTCAGAGAACTTAAAAGAACTCAAGACTTCTGGGAAGTTCAATTAGGA…
>AUT-500299333
AGGGAAGCCCTATTAGACACAGGAGCAGATGATACAGTATTAGAAGACATGGATTTGCCAGGAAGATGGAAACCAAAAATGATAGGGGGAATTGGAGGTTTTATCAAAGTAAGACAGTATGATCAGATACCCATAGAAATTTGTGGACATAAGGCTATAGGTACAGTATTAGTAGGACCCACACCTGTCAACATAATTGGAAGAAATTTGTTGACTCAGATTGGTTGCACTTTAAATTTCGAAATGGAAAAGGAAGGGAAAATTTCAAAAATTGGGCCTGAAAATCCATACAATACTCCAGTATTTGCCATAAAGAAAAAGGATGGTACTAAATGGAGAAAATTAGTAGATTTCAGAGAACTTAAGAGAACTCAAGACTTCTGGGAAATTCAATTAGGA…
>AUT-500299424
ATGGAAGCTCTATTAGATACAGGAGCAGATGATACAGTATTAGAAGAAATGAATTTGCCAGGAAGGTGGAAACCAAAAATGATAGGGGGAATTGGAGGTTTTATCAAAGTAAGACAGTATGATCAGATACCCATAGAAATCTGTGGACATAAAGCTATAGGTACAGTATTAGTAGGACCTACACCTGTCAACATAATTGGAAGAAATCTGTTGACTCAGATTGGYTGCACTTTAAATTTTGAAATGGAAAAGGAAGGGAAAATTTCAAAAATTGGGCCTGAAAATCCATACAATACTCCARTRTTTGCCATAAAGAAAAAAGACAGTACTAAATGGAGAAAATTAGTAGATTTYAGAGAACTTAAGAGAACTCAAGACTTTTGGGAAGTGCAATTAGGA…
>AUT-500299556
AARGAAGCTCTATTAGATACAGGAGCAGATGATACAGTATTAGAAGAAATRAATTTGCCAGGAAGATGGAARCCAAAAATGATAGGGGGAATTGGAGGTTTTATCAAAGTAAGACAGTATGATCAGGTACCCATAGAAATCTGTGGMCATAAAGCTATAGGTACAGTATTAGTRGGACCTACACCTGTCAACATAATTGGAAGAAATCTGTTGACTCAGATTGGTTGCACTTTAAATTTTGAAATGGAAAAGGAAGGAAARATTTCAAAAATTGGGCCTGAAAAYCCATACAATACTCCAGTATTTGCCATAAAGAAAAARGACAGTACTAAATGGAGAAAATTAGTAGAYTTCAGAGAACTYAAGARRACTCAGGACTTCTGGGAAGTTCAATTAGGA…
>AUT-500299629
AAAGARGCTCTCTTAGACACAGGAGCAGATGATACAGTRTTAGAAGAAGTAAATTTGCCAGGAAAATGGAAACCAAAAATGATAGGAGGAATTGGAGGTTTTATCAAAGTAAGACAATATGAGCAAATACCTATAGAAATTAGTGGAAAAAAGGCCATAGGTACAGTATTAGTAGGACCCACACCTGTCAACATAATTGGAAGRAAYATGTTGACTCAGCTTGGATGCACACTAAATTTTGAAATGGARAAGGAAGGAAAAATTACAAAAATTGGGCCTGAAAATCCATATAACACTCCAATATTTGCCATAAAAAAGAAGGACAGTACTAAGTGGAGAAAATTAGTAGATTTYAGGGAACTCAAAAGAACTCAAGATTTTTGGGAGGTYCAATTAGGA…
>AUT-500299700
AAAGAAGCTCTATTAGATACAGGAGCAGATGATACAGTATTGGAAGACATAAATTTGCCAGGAAAATGGAAACCAAGAATGATAGGGGGAATTGGAGGCTTCATCAAGGTAAAACAGTATGATCAGATATCTATAGAAATTTGTGGAAAAAAGGCTATAGGTACAGTACTAGTAGGACCTACACCTGTCAACATAATTGGAAGAAATATGTTGACCCAGATTGGTTGTACTTTAAATTTCGAAATGGAGAAGGAAGGAAAAATTTCAAAAATTGGGCCCGAAAACCCATACAATACTCCAATATTTGCTATAAAGAAAAAAGATAGCACTAAATGGAGAAAATTAGTAGATTTCAGAGAACTCAAGAGGACTCAAGACTTTTGGGAAGTTCAATTAGGA…
>AUT-500299739
AAGGAAGCTCTATTAGATACAGGAGCAGATGATACAGTATTAGAAGAAATGAATTTRCCAGGAAGATGGAAACCAAAAATGATAGGAGGAATTGGAGGTTTTATCAAAGTAAGACAGTATGATCAAGTACCCATAGAAATCTGTGGACATAAGGCTATAGGTACAGTRTTAATAGGACCTACACCTGTCAACATAATTGGAAGAAATCTGTTGACCCAGCTTGGTTGCACTTTAAATTTTGAACTGGAAAAGGAAGGAAAAATTTCAAAAATTGGGCCTGAAAATCCATACAATACTCCAGTATTTGCYATAAAGAAAAAAGACAGTACCAAATGGAGAAAATTAGTAGATTTCAGAGAACTTAARAGAACTCAAGACTTCTGGGAAGTYCAGTTAGGA…
>AUT-500299978
AGAGAAGCTCTATTAGATACAGGAGCAGATGATACAGTATTAGAAGACATAAATTTGCCAGGGAAATGGAAACCAAGAATGATAGGGGGAATTGGAGGCTTCATCAAAGTAAAACAGTATGATCAGATAGCTATAGAAATTTGTGGAAAAAAGGCTATAGGTACAGTACTAGTAGGACCTACACCTGTCAACATAATTGGAAGAAATATGTTGACCCAGATTGGTTGTACTTTAAATTTCGAAATGGAAAAGGAAGGAAAAATTTCAAAAATTGGGCCYGARAATCCATACAAYACTCCAATATTTGCTATAAAGAAAAAAGATAGCACTAAATGGAGRAAATTAGTAGATTTCAGAGAGCTCAAGAGAACTCAAGACTTTTGGGARGTTCAATTAGGA…
>AUT-500300022
AAGGAAGCTCTATTAGATACAGGAGCAGATGATACAGTATTAGAAGAAATGAATTTGCCAGGAAGATGGAAACCAAAAATGATAGGGGGAATTGGAGGGTTTATCAAAGTAAGACAATATGATCAGATACCCGTAGAAATCTGTGGACATAAAGCTATAGGTACAGTGCTAGTAGGACCYACACCTGTCAACATAATTGGAAGAAATTTGTTGACTCAGCTTGGTTGCACTTTAAATTTTGAAATGGAAAAGGAAGGAAAAATTTCAAAAATCGGGCCTGAAAATCCATACAATACTCCAGTATTTGCCATAAAGAAAAAAGACAGTACTAAATGGAGAAAATTAGTAGATTTCAGAGAACTTAAGAGAACTCAAGACTTCTGGGAAGTTCAATTAGGA…
>AUT-500300111
AAGGAAGCTCTATTAGATACAGGAGCAGATGATACAGTATTAGAAGAAATGAATTTGCCAGGAAAATGGAAACCAAAAATGATAGGGGGAATTGGAGGCTTTATCAAAGTAAGGCAATATGATCAAATACCCATAGAAATCTGTGGACACAAAGCTGAAGGTACAGTCTTAATAGGACCTACACCTGTCAACATAATTGGAAGAAATCTGTTGACTCAGATTGGGTGTACTTTAAATTTTGAAATGGAAAAGGAAGGAAAAATTTCAAGAATTGGGCCTGAAAATCCATACAATACTCCAATATTTGCCATAAAGAAAAAAGATAGCACTAAGTGGAGAAAATTAGTGGATTTCAGAGAACTTAAGAGAACTCAAGACTTCTGGGAAGTTCAACTAGGA…
>AUT-500300135
AAAGAAGCTCTATTAGATACAGGAGCAGATGATACAGTATTAGAAGATATAAATTTGCCAGGAAAATGGARACCAAAAATGATAGGGGGAATTGGAGGTTTTATCAAAGTAAGGCAATATGATCAGRTACAKATAGAAATCTGTGGAAAAAAGGCTATAGGTACAGTATTAGTAGGACCTACACCTGTCAACATAATTGGACGAAATATGTTGACTCAGATTGGTTGTACTTTAAATTTCGAGATGGAAGAGGAAGGAAAAATTTCAAAAATTGGGCCTGAAAATCCATACAATACTCCAGTATTTGCTATAAAGAAAAARGACAGCACCAAATGGAGAAAATTAGTAGATTTCAGAGAGCTCAAGAGAACTCAGGACTTTTGGGAAGTTCAATTAGGA…
>AUT-500300434
AAGGAAGCTCTATTAGATACAGGAGCAGATGATACAGTATTAGAAGAAATGAGTTTGCCAGGAAAATGGAAACCAAAAATGATAGGGGGAATTGGAGGTTTTATCAAAGTAAGACAGTATGATCAGATACTTGTAGAAATCTGTGGACATAAAGCTATAGGTACAGTATTAGTAGGACCTACACCTGTCAACATAATTGGAAGAAATCTGTTGACTCAGATTGGTTGCACTTTAAATTTTGAACTAGAAAAGGAAGGGAAGATTTCAAAAATTGGGCCTGAAAATCCATACAATACTCCAGTATTTGCCATAAAGAAAAAAGACAGTACTAAATGGAGAAAATTAGTAGATTTTAGAGAACTCAAAAGAACTCAAGACTTCTGGGAAGTTCAATTAGGA…
>AUT-500300444
AAGGAAGCTCTATTAGATACAGGAGCAGATGATACAGTATTAGAAGAAATGAATTTGCCAGGAAGATGGAAGCCAAAAATGATAGGGGGAATTGGAGGTTTTATCAAAGTAAGACAGTATGATCAGATARMCRTAGAMATCTGTGGACATAAARCTATAGGTACAGTGTTAGTAGGRCCTACACCTGTCAACATAATTGGAAGAAATCTGTTGGCTCAGATTGGKTGCACTTTAAATTTGGAAATGGAAAAGGAAGGAAAAATTTCAAGAATTGGGCCTGAAAATCCATACAATACTCCAGTATTTGCCATAARGAAAAAAGACAGTACTAAATGGAGAAAATTAGTAGATTTCAGAGAACTTAAGAGAACTCAAGACTTCTGGGAAGTTCAATTAGGA…
>AUT-500300638
AGGGAAGCCCTATTAGATACAGGAGCAGATGATACAGTATTAGAAGAAATGARTTTACCAGGAAGATGGAAACCAAAAATGATAGGGGGAATTGGAGGTTTTATCAAAGTAAGACAGTATGATCAGGTACACATAGAAATTTGTGGACATAAGGCTATAGGTACAGTATTAGTAGGACCCACACCTGTCAACATAATTGGAAGAAATTTGTTGACTCAGCTTGGTTGCACTTTAAATTTTGAAATGGAAAAAGAAGGGAAAATTTCAAAAATTGGGCCTGAAAATCCATACAATACTCCAGTATTTGCCATAAAGAAAAAGGATGGTACTAAATGGAGAAAATTAGTAGATTTCAGAGAACTTAAGAGAACTCARGACTTCTGGGAAGTTCAATTAGGA…
>AUT-500300695
AAGGAGGCTCTCTTAGACACAGGAGCAGATGATACAGTATTAGAAGAAMTRVVTTTGCCAGGAARATGGAAACCAAAAATGATAGGAGGAATTGGAGGTTTTATCAAAGTAAGACAGTATGATGAAATACTTATAGAAATTTGTGGAAAAAAGGCTATAGGTACAGTATTAGTAGGACCTACACCTGTCAACATAATTGGAAGAAACATGTTGACTCAGCTTGGATGCACACTAAATTTTGAAATGGAAAAGGAAGGAAAAATTTCAAAAATTGGGCCTGAAAATCCATATAAYACTCCAGTATTTGCCATAAAAAAGAAGGACAGTACTAAGTGGAGAAAATTAGTAGATTTCAGGGAACTCAAAAGAACCCAAGACTTTTGGGAAGTTCAATTAGGA…
>AUT-500300899
AAGGAAGCTTTATTAGATACAGGAGCAGATGATACAGTATTAGAAGAAATGAATTTGCCAGGRAGATGGAAACCAAAAATGATAGGGGGAATTGGAGGTTTTATYAAAGTAAGRCAGTATGATCAGATACYCGTAGAAATCTGTGGACATAAAGCTATAGGTACAGTGTTAGTAGGACCTACACCTGTCAACATAATTGGAAGAAATCTGTTGACTCAGCTTGGGTGCACTTTAAATTTTGAAATGGAGAAGGAAGGGAAAATTTCAAAAATTGGGCCTGAAAATCCATACAATACTCCAGTATTTGCCATAAAGAAAAAAGACAGTACTAAATGGAGAAAGTTAGTAGATTTCAGAGAACTTAAAAGAACTCAAGACTTCTGGGAAGTYCAATTAGGA…
>AUT-500301088
AAAGAAGCTCTATTAGATACAGGAGCAGATGATACAGTATTAGAAGAGATAAATTTGCCAGGAAAATGGAAACCAAAAATGATAGGGGGAATTGGAGGTTTTATCAARGTAAGGCAATATGATCAGATACYTATAGAAATTTGTGGAAAAAAGGCTATAGGTACAGTATTAGTAGGACCTACACCTGTCAACATAATTGGACGAAATATGTTGACTCAGATTGGTTGTACTTTAAATTTCGARATGGAAAAGGAAGGAAAAATCTCAAAAATTGGGCCTGAAAATCCATACAATACTCCAGTATTTGCTATAAAGAAAAAGGACAGCACCAAATGGAGGAAATTAGTAGATTTCAGAGAGCTCAAAAGAACTCAGGACTTTTGGGAAGTTCAATTAGGA…
>AUT-500301203
AAAGAAGCTCTATTAGACACAGGAGCAGATGATACAGTATTARAARACATAAATTTGCCAGGAAAATGGAAACCAAGAATGATAGGGGGAATTGGAGGCTTCATCAAAGTAAAACAGTATGATCAGATATCTATGGAAATTTGTGGAAAAAAGGCTATAGGTACAGTACTAGTAGGACCTACACCTGTCAACATAATTGGAAGGAATATGTTGACCCAGATTGGTTGTACTTTAAATTTCGAAATGGAAAAAGAAGGGAAAATTTCAAAAATTGGGCCAGAAAATCCATACAATACTCCAATATTTGCTATAAAGAAAAAAGATAGCACTAAATGGAGGAAATTAGTAGATTTCAGAGAGCTCAAGAGAACTCAAGACTTTTGGGAAGTGCAATTAGGA…
>AUT-500301305
AWGGAAGCTCTATTAGATACAGGAGCAGATGATACAGTATTAGAAGAAATARATTTGCCAGGAAGATGGAAACCAAAAATGATAGGGGGAATTGGAGGTTTTATCAAAGTAAGACAGTATGATCAGATACYYRTAGAAATYTGTGGRCATAAAGCTATAGGTACAGTRTTAGTAGGACCTACACCTGTCAACATAATTGGAAGAAATCTGTTGACTCAGATTGGMTGTACTTTAAATTTYGAAATGGAAAAGGAAGGAAAAATTTCAAAAATTGGGCCTGAAAATCCATACAATACTCCAGTATTTGCCATAAAGAAAAARGACAGTACTAAATGGAGRAAATTAGTAGATTTCAGAGAACTTAAGAGAACTCARGACTTYTGGGAAGTTCAATTAGGA…
>AUT-500301316
AAGGAAGCTCTATTAGATACAGGAGCAGATGATACAGTATTAGAAGAAATGAATTTGBCAGGAAGATGGAAACCAAAAATGATAGGGGGAATTGGAGGTTTTATCAAAGTAAGACAGTATGATCAGATACCCATAGAAATCTGTGGGCATAAAGCTATAGGTACAGTGTTAGTAGGACCTACACCTGTCAACATAATTGGAAGAAATCTATTGACTCAGATTGGTTGCACTTTAAATTTTGAAATGGAAAAGGANNGGAAAATTTMMAAAATTGGGCCTGAAAACCCATRCAATACTCCAGTGTTTGCCATAAAGAAAAAAGACAGTACTAAATGGANAAARTTAGTAGATTTCAGAGAACTTAAGAAAACTCAAGATTTCTGGGAAGTTCAATTAGGA…
>AUT-500301586
AAGGAAGCTCTATTAGATACAGGAGCAGATGATACAGTACTAGAAGACATGAATTTGCCAGGAAGATGGAGACCAAAAATAATAGGGGGAATTGGAGGTTTTATCAAAGTAAGACAGTATGATCAAATACCCATAGAAATCTGTGGAATTAAAACTATAGGTACAGTATTAGTAGGACCTACACCTGTCAACATAATTGGAAGAAATCTGATGACTCAGCTTGGCTTCACTTTAAATTTTGAATTGGAAAAGGAWGGAAAAATTTCAAAAATTGGGCCTGAAAATCCATACAATACTCCAGTATTTGCCATAAAGAAAAAGAATAGTACTAGATGGAGAAAATTAGTAGATTTCAGAGAACTTAAGAGAACTCAAGACTTCTGGGAAGTTCAATTAGGA…
>AUT-500301826
AAAGAAGCTCTATTAGATACAGGAGCAGATGATACAGTATTAGAAGAYATAAATTTGCCAGGAAAATGGAAACCAARAATGATAGGGGGAATTGGAGGCTTYATCAARGTAARACARTATGATCAGRTATCTATGGAAATTTGTGGAAAAAAGGCTATAGGTACAGTACTAGTAGGACCTACACCTGTCAACATAATTGGAAGAAATATGTTGACCCARATTGGTTGTACTTTAAATTTCGAAATGGAAAAGGAAGGRAAAATTTCAAAAATTGGGCCCGAAAATCCATACAATACTCCAATATTTGCTATAAAGAAAAAAGATAGCACTAAATGGAGRAAATTAGTAGATTTCAGAGARCTCAAGAGRACTCAAGACTTTTGGGAAGTTCAATTAGGA…
>AUT-500301836
AAAGAAGCTCTATTAGATACAGGAGCAGATGATACGGTATTAGAAGACATAAATTTGCCAGGAAAATGGAAACCAAAAATGATAGGGGGAATTGGAGGTTTTATCAAGGTAAGACAGTATGATCAGATACTTRTAGAAATTTGTGGAAAAAAGGCTATAGGTACAGTATTAGTAGGGCCTACCCCTGTCAACATAATTGGAAGAAATATGTTGACTCAGATTGGTTGTACTTTAAATTTTGACATGGAAAAGGAAGGAAAAATTTCAAAAATTGGACCTGAAAATCCATACAATACTCCAGTATTTGCTATAAAGAAAAAAGATAGCACTAAGTGGAGGAAATTAGTAGATTTCAGGGAGCTCAAAAGAACTCAGGACTTTTGGGAAGTTCAATTAGGA…
>AUT-500301907
AAGGAAGCTCTATTAGATACAGGAGCAGATGATACAGTATTAGAAGAAATGAATTTGCCAGGAAAATGGAAACCAAAAATGATAGGGGGAATTGGAGGTTTTATCAAAGTAAGACAGTATGATCAGATACYCATRGAAATCTGTGGGCATAAAGCTATAGGTACAGTTTTAGTAGGACCTACACCTGTCAACATAATTGGAAGAAATCTGTTGACTCAGATTGGATGCACTTTAAATTTTGAAATGGAAAAGGAAGGAAAAATTTCAAAAATTGGGCCTGAAAATCCATACAATACTCCAGTATTTGCCATAAAGAAAAAAGACAGTACTAAATGGAGAAAATTAGTAGATTTCAGAGAACTTAAGAAAACTCAAGACTTCTGGGAAGTTCAATTAGGA…
>AUT-500301914
AAAGAAGCTCTATTAGATACAGGAGCAGATGATACAGTATTAGAAGACATAAATTTGCCAGGAAAGTGGAAACCAAAAATGATAGGGGGAATTGGAGGTTTTATCAAAGTAAGACAGTATGATCAGATACCTATAGAAATTTGCGGGAAAAAGGCTATAGGTACAGTATTAATAGGGCCTACCCCTGTCAACATAATTGGAAGAAATATGTTGACTCAGATTGGTTGTACTTTAAATTTTGAAATGGAAAAGGAAGGAAAAATTTCAAAAATTGGGCCTGAAAATCCATACAATACTCCAGTATTTGTTATAAAGAAAAAAGATAGCACTAAGTGGAGAAAATTAGTAGATTTCAGGGAGCTCAAAAGAACTCAGGACTTTTGGGAAGTTCAATTAGGA…
>AUT-500301932
AAAGAAGCTCTATTAGATACAGGAGCAGATGATACAGTATTAGAAGACATAAATTTGCCAGGAAAATGGAAACCAAGAATGATAGGGGGAATTGGAGGCTTCATCAAAGTAAAACAGTATGATCAGATATCTATGGAAATTTGTGGAAAAAAGGCTATAGGTACAGTACTGGTAGGRCCTACACCTGTCAACATAATTGGAAGAAATATGTTGACCCAAATTGGTTGTACTTTAAATTTCGAAATGGAAAAGGAAGGAAAAATTTCAAAAATTGGGCCCGAAAATCCATACAATACTCCAATATTTGCTATAAAGAAAAAAGATAGCACTAAATGGAGGAAATTAGTAGATTTCAGAGAGCTCAAGAGGACTCAAGACTTTTGGGAAGTTCAATTAGGA…
>AUT-500301990
AAGGAAGCTCTATTAGATACAGGAGCAGATGATACAGTATTAGAAGAAATGAATTTGCCAGGRAGATGGAAGCCAAAAATGATAGGGGGAATTGGAGGTTTTATCAAAGTAAGACAGTATGATCAGATACTCATAGAAATCTGTGGACATAAAGCTATAGGTACAGTATTAGTAGGACCTACACCTGTCAACATAATTGGAAGAAATCTGTTGACTCAGATTGGTTGCACTTTAAATTTTGAAATGGAAAAGGAAGGAAAAATTTCAAAAATTGGGCCTGAAAATCCATACAATACTCCAGTATTTGCCATAAAKAAAAAAAACAGTAMTAGATGGAGAAAATTAGTAGATTTCAGAGAACTTAAGAGAACTCAAGAYTTYTGGGAAATTCAACTAGGA…
>AUT-500302003
AAGGAAGCTCTATTAGATACAGGAGCAGATGAYACAGTAGTAGAAGAAATGTATTTRCCAGGGAGATGGAAACCAAAAATGATAGGGGGAATTGGAGGTTTTATCAAAGTAAGACAGTATGATCAGGTATCCMTTGAAATYTGTGGGAAAAARGCTATAGGTACAGTATTAGTAGGACCTACACCTGTCAACATAATTGGAAGAAATCTGTTGACTCAGATTGGTTGCACTTTAAACTTTGATATGGAAAAGGAAGGGAAAATTTCAAAAATTGGGCCTGAAAATCCATACAATACCCCARTATTTGCAATAAAGAAAAAAGACAGTACTAAATGGAGAAAATTAGTAGATTTYAGAGAACTTAAGAGAACTCAAGACTTCTGGGARGTTCAATTAGGA…
>AUT-500302012
AAAGAAGCCCTATTAGATACAGGRGCAGATGATACAGTATTAGAAGACATAAATTTGCCAGGAAAATGGAAACCAAAAATGATAGGGGGAATTGGAGGTTTTATCAAAGTAAGACAGTATGATCAGATACYTATAGAAATTTGTGGAAAAAAGGCTATAGGTACAGTATTAGTAGGACCTACCCCTGTCAACATAATTGGAAGAAATATGTTGACTCAGCTTGGTTGTACTTTAAATTTTGAGATGGAAAAGGAHGGAAAAATTTCAMRARTTGGGCCTGAAAAYCCATACAATACTCCAGTATTTGTTATAAAGAAAAAGGACAGCACTAAGTGGAGGAAATTAGTAGATTTCAGGGAGCTCAAAAGAACTCAGGACTTTTGGGAAGTTCAATTAGGA…
>AUT-500302034
AGAGAAGCTCTATTAGATACAGGAGCAGATGATACAGTATTAGAAGAGATAAATTTGCCAGGAAAATGGAAACCAAAAATGATAGGGGGAATTGGAGGTTTTATCAAGGTAAGACAATATGATCAGATACCTATWGAAATTTGTGGAAAAAAGGCTATAGGTACAGTRTTAGTAGGACCTACACCTGTCAACATAATTGGAAGAAACATGTTGACTCAGCTTGGKTGTACTTTAAATTTYGAGATGGAACAGGAAGGAAAAATCTCAAAAATTGGGCCTGAAAATCCATACAATACTCCAGTATTTGCTATAAAGAAAAAGGACAGTACTAAATGGAGGAAATTAGTAGATTTCAGAGAGCTCAAAAGAACTCARGACTTTTGGGAAGTTCAATTAGGA…
>AUT-500302042
AAAGAAGCTCTATTAGATACAGGAGCAGATGATACAGTATTAGAAGACATAAATTTGCCAGGAAAATGGAAACCAAAAATGATAGGGGGAATTGGAGGTTTTATCAAGGTAAGACARTATGATCAGATACTTATAGAAATTTGTGGAAAAAAGGCTATAGGTACRGTATTAGTAGGACCTACCCCTGTCAACATAATTGGAAGAAATATGTTGACTCAGCTTGGTTGTACTTTAAATTTTGASATGGAAAAGGAAGGAAAAATTTCAAAAATTGGGCCTGAAAATCCATATAATACTCCTGTATTTGCTATAAAGAAAAAGGACAGCACTAAGTGGAGGAAATTAGTAGATTTTAGGGAGCTCAAAAGAACTCAGGACTTTTGGGAAGTTCAATTAGGA…
>AUT-500302140
AAGGAAGCCCTATTAGATACAGGAGCAGATGATACAGTATTAGAAGAAATGAGTYTGCCAGGAAGATGGAAACCAAAAATGATAGGGGGAATTGGAGGTTTTATCAAAGTAAGACAGTATGATCAGGTAACCATAGAAATCRRTGGACATAAAGCTATAGGTACAGTATTAGTAGGACCTACACCTGTCAACATAATTGGAAGAAATCTGTTGACTCAGATTGGTTGCACTTTAAATTTTGAAATGGAAAAGGAAGGGAAAATTTCAAAAATTGGGCCTGAAAACCCATACAATACTCCARTATTTGCCATAAAGAAAAAAGATGGCACTAAATGGAGAAAATTAGTAGATTTCAGAGARCTTAAGAGGACTCAAGACTTCTGGGAAGTTCAATTAGGA…
>AUT-500302154
AAGGAAGCTCTATTAGATACAGGAGCAGATGATACAGTATTAGAAGAAATGAATTTGCCAGGAAGATGGAAACCAAAAATGATAGGGGGAATTGGAGGTTTTATCAAAGTAAGACAGTATGATCAGGTGCACRTAGAAATCTGTGGACATAAAGCTATAGGTACAGTATTAATAGGACCTACACCTGTCAACATAATTGGAAGAAATTTGTTAACTCAGCTTGGTTGCACTTTAAATTTTGAAATGGAAAAGGAAGGGAAAATTTCAAGAGTTGGGCCTGAAAATCCATACAATACTCCAGTATTTGCTATAAAGAAAAAAGACAGTACTAAATGGAGAAAATTAGTAGATTTCAGAGAACTTAAGARAACTCAAGACTTCTGGGAAGTCCAATTAGGA…
>AUT-500302207
AAGGAAGCATTATTAGATACWGGAGCAGATGATACAGTATTAGAAGAAATGTGTTTGCCAGGGAGATGGAAACCAAAAATGATAGGGGGAATTGGGGGTTTTATCAAAGTAAGACAGTATGATCAAATACTCGTAGAAATCTGTGGACATAAAGCTGTAGGTACAGTATTAATAGGACCTACACCTGTCAACATAATTGGAAGAAATCTGTTGACTCAGATTGGTTGCACTTTAAATTTTGAAATGGAGAAGGAAGGGAAAATTTCAAAAATTGGGCCTGAAAATCCATACAATACTCCAGTATTTGCAATAAAGAAAAAAGACAGTACTAAATGGAGAAAATTAGTGGACTTCAGAGAACTTAAGAGAACTCAAGACTTCTGGGAAGTGCAATTAGGG…
>AUT-500302237
AAAGAAGCTCTATTAGATACAGGAGCAGATGATACAGTATTAGAAGACATAAATTTGCCAGGAAAGTGGAAACCAAAAATGATAGGGGGAATTGGAGGTTTTATCAAAGTAAGACAGTATGATCAGRTACCTATAGAAATTTGTGGAAAAAAGGCTATAGGTACAGTATTAATAGGGCCTACCCCTGTCAACATAATTGGAAGAAATATGTTGACTCAGCTTGGTTGTACTTTAAATTTT----TGGAAAAGGAAGGAAAAATTTCAAAAATTGGGCCTGAAAATCCATACAATACTCCAGTATTTGTTATAAAGAAAAAAGATAGCACTAAGTGGAGGAAATTAGTAGATTWCAGGGAGCTCARAAGAACTCAGGACTTTTGGGAAGTTCAATTAGGA…
>AUT-500302253
AAGGAAGCTCTATTAGACACAGGAGCAGATGATACAGTATTAGAAGACATAAATTTACCAGGAAAATGGAAACCAAAAATGATAGGGGGAATTGGAGGTTTTATCAAAGTAAAACARTATGATAACATARYCATAGACATTTGTGGACACAAGGCTATAGGTACAGTGTTGATAGGACCTACGCCTGTCAACATAATTGGAAGAAACCTGTTGACTCARATTGGKTGTACATTAAATTTTGACATGGAAAAGGAAGGAAAAATTTCAAAAATTGGGCCTGAAAATCCATACAATACTCCAGTATTTGCCATAAAGAAAAAAGACAGTACTAAATGGAGAAAATTAGTAGATTTCAGAGAACTTAAAAGAACTCAAGATTTTTGGGAGGTTCAATTAGGA…
>AUT-500302274
AAGGARGCTCTYTTAGAYACAGGAGCAGATGATACAGTATTAGAAGAAATAAATTTGCCAGGAAAATGGAAACCAAAAATGATAGGAGGAATTGGAGGTTTTATCAAAGTAAGACARTATGATCAAATACTTATAGAAATTTGTGGAAAAAAGGCTATAGGTACAGTRTTAGTGGGRCCTACACCTGTCAACATAATTGGAAGAAACATRTTGACTCAGCTTGGATGCACACTAAATTTTGAAATGGARAAGGAAGGAAAAATTACAAAAATTGGGCCTGAAAATCCATATAACACTCCCATATTTGCCATAAAAAAGAAGGACAGTACTAARTGGAGAAAATTAGTAGATTTCAGGGAACTCAAAAGAACTCAAGAYTTTTGGGAGGTTCAATTAGGW…
>AUT-500302422
AAAGAAGCTCTATTAGATACAGGAGCAGATGATACAGTATTAGAAGATATAAATTTGCCAGGAAAATGGAAACCAAAAATGATAGGGGGAATTGGAGGGTTTATCAAGGTAAGGCAATATGATCAGGTAGCTATAGAAATTTGTGGAAAAAAGGCTATAGGTACAGTATTAGTAGGACCTACACCTATCAACATAATTGGACGAAATATGTTGACTCAGATTGGTTGTACTTTAAATTTCGARATGGAAGAGGAAGGAAAAATTTCAAAAATTGGGCCTGAAAATCCATACAATACTCCAGTATTTGCTATAAAGAAAAAGGACAGCACCAAATGGAGGAAATTAGTAGATTTCAGAGAACTCAAAAGAACTCAAGACTTTTGGGAAGTTCAATTAGGA…
>AUT-500302435
ATAGAAGCTCTATTAGATACAGGAGCAGATGATACAGTYTTAGAAGAAATARATTTGCCAGGAAGATGGAAACCAAAAATGATAGGGGGAATTGGAGGTTTTATCAAAGTAARACAGTATGATCAGATACMTMTAGAAATTTGTGGAAAAAAGGCTATAGGCACAGTATTGGTAGGACCTACACCTRTCAAYATAATTGGAAGAAAYATGTTGACCCAGATTGGTTGTACTCTAAATTTTGAGATGGAAAAGGAAGGAAAAATTACAARAATTGGGCCTGAAAATCCATACAATACTCCAGTATTTGCTATAAAGAAAAAGGACAGCACTAAATGGAGAAAATTAGTAGATTTYAGAGAGCTAAAAAGAACTCAGGACTTCTGGGAAGTTCAATTAGGG…
>AUT-500302449
AAGGAAGCTCTATTAGATACAGGAGCAGATGATACAGTATTAGAAGAAATGAGTCTRCCAGGAAGATGGARACCAAAAATGATAGGGGGAATTGGAGGTTTTATCAAAGTAAAACAGTATGATCARRTAKTCATAGAAATCAGTGGACATMAAGTTAYAGGGACAGTATTAATAGGACCTACACCTGTCAACATAATTGGRAGAAATCTGTTGACTCAGCTTGGATGTACTTAAAATTTTGAAATGGAAAAGGAAGGMAAAATTTCAAAGATTGGGCCTGAAAATCCATACAATACTCCAGTVTTTGCYATAAAGAAAAAAGACAGTACTAAATGGAGAAAATTAGTAGATTTCAGAGAACTTAARAGAACTCAAGACTTCTGGGAAGTTCAATTGGGA…
>AUT-500302484
AAGGAAGCTCTATTAGATACAGGAGCAGATGATACAGTATTAGAAGAAATAAATTTGCCAGGAAGATGGAAACCAAAAATGATAGGGGGAATTGGAGGTTTTATCAAAGTAAGACAGTATGATCAAGTACCCATAGAAATCTGTGGGCATAAAGCTATAGGTACAGTATTAGTAGGACCTACACCTGTCAACATAATTGGAAGAAATCTATTGACTCAGATTGGTTGCACTTTAAATTTTGAAATGGAAAAGGAAGGGAAAATTTCAAAAATTGGGCCTGAAAATCCATATAATACTCCAGTATTTGCCATAAAGAAAAAAGACAGTACTAAATGGAGAAAAYTAGTAGATTTYAGAGAACTTAAGAAAACYCAAGACTTCTGGGAAGTTCAATTAGGA…
>AUT-500302497
AAGGAAGCTCTATTAGATACAGGAGCAGATGATACAGTRTTAGAAGAAATGAATTTGCCAGGAAAATGGAAACCAAAAATGATAGGGGGAATTGGAGGTTTTATCAAAGTAAGACAGTATGATCAGATATCCATAGAAATCTGTGGACACAAAGCYATAGGTACAGTATTAATAGGGCCTACACCTGTCAACATAATTGGAAGAAATCTGTTGACTCAGATTGGCTGTACTTTAAATTTTGAAATGGAAAAGGAAGGAAAAATTTCAAAAATTGGGCCTGAAAATCCATACAATACTCCAGTGTTTGCCATAAAGAAAAAAGACAGTACTAAATGGAGAAAATTRGTGGATTTCAGAGAACTTAAGAGAACTCAAGACTTCTGGGAAGTTCAAYTAGGA…
>AUT-500302522
AGAGAAGCTCTATTAGATACAGGAGCAGATGATACAGTATTAGAAGACATAAATTTGCCAGGAAAATGGAAACCAAAAATGATAGGGGGAATTGGAGGCTTCATCAAGGTAAAACAGTATGATGASATACCTRTAGAAATTTGTGGGAAAAAAGCTATAGGTACAGTATTAGTAGGACCTACACCTGTCAACATAATTGGAAGAAATATGTTGACCCAGCTTGGTTGTACTTTAAATTTCGAAATGGAAAAGGAAGGAAAAATTTCAAAAATTGGGCCTGAAAACCCATACAATACTCCAATATTTGCTATAAAGAAAAAAGACAGCACTAAATGGAGGAAATTAGTAGATTTCAGAGAGCTCAAAAGAACTCAAGACTTTTGGGAAGTTCAATTAGGA…
>AUT-500302530
AAAGAAGCTCTATTAGATACAGGAGCAGATGATACAGTATTAGAAGACATAGATTTRCCAGGAAAATGGAAACCAAAAATGATAGGGGGAATTGGAGGTTTTATCAAGGTAAGACAGTATGATCAGATARYTATGGAAATTTGTGGAAAAAAGGCTATAGGTACGGTATTAGTAGGACCTACYCCTGTCAACATAATTGGAAGAAATATGTTGACTCAGATTGGTTGTACTTTAAATTTTGAAATGGAAAAGGAAGGAAAAATTTCAAGAATTGGGCCTGAAAACCCATAYAATACTCCAGTATTTGCTATAAARAAAAAGGACAGCAYTAAGTGGAGRAARTTAGTAGATTTCAGGGAGCTCAAAAGAACTCAGGACTTTTGGGAAGTTCAATTAGGA…
>AUT-500302538
AAGGAAGCTCTATTAGATACAGGAGCAGATGATACAGTATTAGAAGAAATAAGTTTGCCAGGAAGATGGAAACCAAAAATGATAGGGGGAATTGGAGGTTTTATCAAAGTAAAACAGTATGAKCAGRTACCAATAGAAATCTGTGGACATAAAGCTATAGGTACAGTATTAGTAGGACCTACACCTGTCAACATAATTGGRAGAAATCTATTGACTCAGCTTGGATGCACTTTAAATTTTGAAATGGAAAAGGAAGGAAAAATTTCAAAGATTGGGCCTGAAAATCCATAYAATACTCCAGTATTTGCCATAAAGAAAAAAGACAGTACTAAATGGAGAAAATTAGTAGATTTCAGAGAACTTAAGAGAACTCAAGACTTCTGGGAAGTTCAATTGGGA…
>AUT-500302546
AAGGAGGCTCTCTTAGACACAGGAGCAGATGATACAGTATTAGAAGAAATAAATTTGCCAGGAAAATGGAAACCAAAAATGATAGGAGGAATTGGAGGTTTTATCAAAGTAAGACAGTATGATGAAATACCYATAGAAATYTGTGGAAAAAAGGCTATAGGTTCAGTATTAGTAGGACCTACACCTGTCAACATAATTGGAAGRAATATGTTGACTCAGCTTGGATGCACACTAAATTTTGAAATGGARAAGGAAGGAAAAATTACAAAAATTGGGCCTGAAAATCCATATAACACTCCAGTATTTGCCATAAAAAAGAARGACAGTACAAAGTGGAGAAAATTAGTAGATTTCAGAGAACTYAAAAGAACTCAAGACTTTTGGGARGTTCAATTAGGA…
>AUT-500302580
AAGGAAGCTCTATTAGATACAGGAGCAGATGATACAGTATTAGAAGACATGAATTTGCCAGGAAGATGGAAACCAAAAATGATAGGGGGAATWGGAGGTTTTATCAAAGTAAGACAGTATGATCAAATACTCGTAGAAATCTGTGGACATAAAGCTATAGGTACAGTATTAGTAGGRCCTACACCTGTCAACATAATTGGCAGAAATCTGTTGACTCAGATTGGTTGCACTCTAAATTTTGAAATGGAAAAGGAAGGGAAAATTTCAAAAATTGGGCCTGAAAATCCATACAATACTCCAGTATTTGCCATAAAGAAAAAAGACAGTACTAAATGGAGAAAATTAGTAGATTTCAGAGAACTTAAGAGAACTCAAGACTTCTGGGAAGTTCARTTAGGA…
>AUT-500302586
AAGGAAGCTCTATTAGATACAGGGGCAGATGATACAGTATTAGAAGAAATGAATTTGCCAGGGAGATGGAAACCAAAAATGATAGGGGGAATTGGAGGATTTATCAAAGTAAGACAATATGATCAGGTACCCATAGAAATCTGTGGACATAAAACTACAGGTACAGTATTAGTAGGACCTACACCTGTCAACATAATTGGAAGAAACCTGTTGACTCAACTTGGTTGCACTTTAAATTTTGAAATGGAAAAGGAAGGGAAAATTTCAAAAATTGGGCCTGAAAATCCATACAATACTCCAGTATTTGCCATAAAGAAAAAAGACAGTAATAAATGGAGAAAATTAGTAGATTTCAGGGAACTTAAGAAAACTCAAGACTTCTGGGAAGTTCAGTTAGGA…
>AUT-500302625
AAAGAAGCTCTATTAGATACAGGAGCAGATGATACAGTATTGGAAGATATAAATTTGCCAGGAAAATGGAAACCAAAAATCATAGGGGGAATTGGAGGTTTTATCAAAGTAAGGCAATATGATCAGATACTTATAGAAATTTGTGGAAAAAAGGCTATAGGTACAGTGTTAGTAGGACCTACACCTATCAACATAATTGGACGAAATATATTGACTCGGATTGGTTGTACTTTAAATTTCGAGATGGAAGAGGAAGGAAAAATCTCAAAAATTGGGCCTGAAAATCCATACAATACTCCAGTATTTGCTATAAAGAAAAAGGACAGCACCAAATGGAGGAAATTAGTAGATTTCAGAGAGCTCAAAAGAACTCAAGACTTTTGGGAAGTTCAATTAGGA…
>AUT-500302638
AAGGAAGCTCTATTAGATACAGGAGCAGATGATACAGTATTAGAGGAAATGAGTTTGCCAGGAAGATGGAAACCAAAAATGATAGGGGGAATTGGAGGTTTTATCAAAGTAAGGCAGTATGATCAAATACCCATAGAAATCTATGGACATAAAGCTATAGGTACAGTATTAATAGGACCCACACCTGTCAACATAATTGGAAGAAATCTGTTGACTCAGATTGGTTGCACTTTAAATTTT----TGGAAAAGGAAGGGAAAATTTCAAAAATTGGGCCTGAAAATCCATACAATACTCCAGTATTTGCTATAAAGAAAAARGACAGTACTAAATGGAGAAAATTAGTAGATTTCAGAGAACTTAAGAGAACTCAAGACTTCTGGGAAGTTCAATTAGGA…
>AUT-500302719
AAAGAAGCTCTATTAGATACAGGAGCAGATGATACAGTATTAGAAGATATAAATTTGCCAGGAAAATGGAAACCAAAAATGATAGGGGGAATTGGAGGYTTTATCAARGTAAGACARTATGATCAGATACTTATAGAAATTTGTGGAAAAAAGGCTATAGGTACAGTRTTAGTAGGACCTACACCTGTCAACATAATTGGACGRAATATGTTGACTCAGATTGGTTGTACTTTAAATTTCGAGATGGARAAGGAAGGAAAAATCTCAAAAATTGGGCCTGAAAATCCATACAATACCCCARTATTTGCTATAAAGAAAAAGGACAGCACCAAATGGAGRAAATTAGTGGATTTCAGAGAGCTCAAAAGAACTCAGGACTTTTGGGAAGTTCAATTAGGA…
>AUT-500302725
AAAGAAGCTCTATTAGATACAGGAGCAGATGATACAGTATTCGAGGACATAAATTTGCCAGGAAAATGGAAACCAAGAATGATAGGGGGAATTGGAGGCTTCATCAAGGTAAAACAGTATGATCAGATACCTATAGAAATTTGTGGGAAAAAAGCTATAGGTACAGTACTAGTAGGACCTACACCTGTCAACATAATTGGAAGAAATATGTTGACCCACATTGGTTGTACTTTAAATTTCGACATGGAAAAGGAAGGAAAAATTTCAAAAATTGGGCCCGAAAATCCATACAATACTCCAATATTTGCTATAAAGAAAAAAGACAGCACTAAATGGAGAAAATTAGTAGATTTCAGAGAGCTTAAAAGAACTCAAGACTTTTGGGAAGTTCAATTAGGA…
>AUT-500304779
AAGGAAGCTCTATTAGATACAGGAGCAGATGATACAGTATTAGAAGAAATGAGTCTGCCAGGAAAATGGAAACCAAAAATGATAGGGGGAATTGGAGGTTTTATCAAAGTWAAACAGTATGATCAGATACCAATAGAAATYTGTGGACATAAAGCTATAGGTACAGTATTAGTAGGACCTACACCTGTYAACATAATTGGRAGAAATCTGTTGACTCAGCTTGGATGCACTTTAAATTTT----TGGAAAAGGAAGGAAAAATTTCAAAAATTGGGCCTGAAAATCCATACAATACTCCAGTATTTGCCATAAAGAAAAARGACAGTACTAAATGGAGAAAATTAGTAGATTTCAGAGAACTTAAGAGAACTCAAGACTTCTGGGAAGTTCAATTGGGR…
>AUT-500304809
AAAGAAGCTCTATTAGATACAGGAGCAGATGATACAGTATTAGAAGACATGAATTTGCCAGGAAAATGGAAACCAAAAATGATAGGGGGAATTGGAGGTTTTATCAAAGTAAGGCAATATGAGCAGATAGCCATAGAAATCTGTGGACATAAAGCTATAGGTACAGTATTAGTAGGACCTACACCTGTCAACATAATTGGAAGAAATCTGTTGACTCAGCTTGGTTGCACTTTAAATTTT----TGGAAAAGGAAGGAAAAATTTCAAAAATTGGGCCTGAAAATCCATATAATACTCCAATATTTGCCATAAAGAAAAAAGACGGTACTAAATGGAGAAAATTAGTAGATTTCAGAGAACTTAAAAGAACTCAAGACTTCTGGGAAGTTCAATTAGGA…
>AUT-500304810
ATAGAAGCTCTATTAGATACAGGAGCAGATGATACAGTATTAGAAGRAATRARTTTAYCAGGAAAATGGAAACCAAAAATGATAGGGGGAATTGGAGGTTTTATCAAAGTAAGACAGTATGATCAGATACYTATAGAAATTTGTGGACAAAAGGCCATAGGCACAGTATTAGTAGGACCTACACCTGTTAACATAATTGGGCGAAATATATTGACTCAGATTGGTTGCACTTTAAATTTT----TGGAAAAGGAAGGAAAAATTTCAARAATTGGGCCTGAAAATCCATACAATACTCCAATATTTGCCATAAAGAAAAAGGATAGTACTAAATGGAGAAAATTAGTAGATTTCAGAGAACTCAAGAGAACTCAAGACTTCTGGGAGGTCCAATTAGGA…
>AUT-500304815
AAGGAAGCCCTATTAGATACAGGAGCAGATGATACAGTATTAGAAGAAATGAGTTTGCCAGGAAGATGGAAACCAAAAATGATAGGGGGAATTGGAGGTTTTATCAAAGTAAGACAGTATGATCAGGTAACCATAGAAATCGATGGACATAAAGCTATAGGTACAGTATTAGTAGGCCCTACACCTGTCAACATAATTGGAAGAAATCTGTTGACTCAGATTGGTTGCACTTTAAATTTT----TGGAAAAGGAAGGGAAGATTTCAAAAATTGGGCCTGAAAACCCATACAATACTCCAGTATTTGCCATAAAGAAAAAAGATGGCACTAAATGGAGAAAATTAGTAGATTTCAGAGAACTTAAGAGGACTCAAGACTTCTGGGAAGTTCAATTAGGA…
>AUT-500304816
AAGGAAGCTCTATTAGATACAGGAGCAGATGATACAGTATTAGAAGAAATGAGTTTACCAGGAAGATGGAAACCAAAGATGATAGGGGGAATTGGAGGTTTTMTCAAAGTRAGACAATATGATCAAATATCCCTAGAAATCTGTGGACATAAAGCTACAGGTACAGTATTAATAGGACCTACGCCTGTCAACATAATTGGAAGAAATCTGTTGACTCAGATTGGCTGCACTTTAAATTTT----TGGAAAAGGAAGGGAAAATCTCAAAGATTGGGCCTGAAAATCCATACAATACTCCAGTATTTGCCATAAAAAAGAAAGACAGTACTAAATGGAGAAAATTAGTAGATTTCAGAGAACTCAAGAGAACTCAAGACTTCTGGGAAGTTCAATTAGGA…
>AUT-500304838
AAGGAAGCTCTATTAGATACAGGAGCAGATGATACAGTATTAGAAGAAATGAATTTACCAGGAAGATGGAAACCAAAAATGATAGGGGGAATTGGAGGTTTTATCAAAGTAAGACAGTATGATCAGATACTCGTAGAAATCTGTGGACATAAAGCTATAGGTACAGTATTAATAGGACCTACACCTGTCAACATAATTGGAAGAAATCTGTTGACTCAGATTGGCTGTACTTTAAATTTT----TGGAAAAGGAAGGAAAAATTTCAAAAATTGGGCCTGAGAATCCATACAATACTCCAGTATTTGCCATAAAGAAAAAGGACAGTACTAAATGGAGAAAATTAGTAGATTTCAGGGAACTTAAGAGAACTCAAGACTTTTGGGAGGTGCAGTTAGGA…
>AUT-500304841
AAGGAAGCTCTATTAGATACAGGAGCAGATGATACAGTATTAGAAGAAATGAATTTACCAGGAAGATGGAAACCAAAAATGATAGGGGGAATTGGAGGTTTTATCAAAGTAAGACAGTATGATCAGATACTCGTAGAAATCTGTGGACATAAAGCTATAGGTACAGTATTAATAGGACCTACACCTGTCAACATAATTGGAAGAAATCTGTTGACTCAGATTGGCTGTACTTTAAATTTT----TGGAAAAGGAAGGAAAAATTTCAAAAATTGGGCCTGAGAATCCATACAATACTCCAGTATTTGCCATAAAGAAAAAGGACAGTACTAAATGGAGAAAATTAGTAGATTTCAGGGAACTTAAGAGAACTCAAGACTTTTGGGARGTGCAGTTAGGA…
>AUT-500304846
AAAGAAGCTCTATTAGATACAGGAGCAGATGATACAGTATTCGAAGACATAAATTTGCCAGGAAAATGGAAACCAAGAATGATAGGGGGAATTGGRGGCTTYATCAAAGTAAAACAGTATGATCAGATACCTATAGAAATTTGTGGGAAAAAAGCTATAGGTACAGTATTAGTAGGACCTACACCTGTCAACATAATTGGAAGAAATATGTTGACCCAGCTTGGGTGTACTCTAAATTTT----TGGAAAAGGAAGGAAAAATTTCAAAAATTGGGCCTGAAAATCCATACAATACTCCAATATTTGCTATAAAGAAAAAAGACAGCACTAAATGGAGGAAATTAGTAGATTTCAGAGAGCTCAAAAGAACTCAAGACTTTTGGGAAGTTCAATTAGGA…
>AUT-500304851
AAGGAAGCTCTATTAGATACAGGAGCAGATGATACAGTATTAGAAGAAATGAATTTGCCAGGGAGATGGAAACCAAAAATGATAGGGGGAATTGGAGGTTTTATCAAAGTAAGACAGTATGATCAGATACCCATAGAAATCTGTGGGCATAAAGCTATAGGTACAGTATTAATAGGACCTACACCTGTCAACATAATTGGAAGAAATCTGTTGACTCAGCTTGGTTGCACTTTAAATTTT----TGGAAAAGGAAGGGAAAATTTCAAAAATTGGGCCTGAAAAYCCATATAATACTCCAATATTTGCCATAAAGAAAAAAGACAGYACTAAATGGAGAAAATTAGTAGATTTCAGRGAACTTAAGAGAACTCAAGACTTCTGGGAAGTTCAATTAGGA…
>AUT-500304853
AAGGARGCTCTATTAGATACAGGAGCAGATGATACAGTATTAGAAGAAATGAATTTGCCAGGAAAATGGAGGCCAAAAATGATAGGGGGAATTGGAGATTTTATCAAAGTAAGACAGTATGATCAAGTACACATAGRAATCTGTGGAAGTAAAGTTATAGGTACAGTATTAATAGGACCCACACCTGTCAACATAATTGGAAGAAATCTGTTGACTCAGCTTGGTTGCACTTTAAATTTT----TGGAAAAGGAAGGAAAAATTTCAAAAATTGGGCCTGAAAATCCATATAATACTCCAGTGTTTGCTATAAAGAAAAAAGACAGTACTAAATGGAGAAAATTAGTAGATTTCAGAGAACTTAAGAGAACTCAAGACTTCTAGGAAGTTCAATTAGGA…
>AUT-500304854
AAAGAAGCTCTATTAGATACAGGAGCAGATGATACAGTATTAGAAGACATAAATTTGCCAGGAAAATGGAAACCAAAAATGATAGGGGGAATTGGAGGTTTTATCAAAGTAAGACAGTATGATCAGATACTTATAGAGATTTGTGGAAAAAAGGCTATAGGTACAGTATTGGTAGGACCCACACCCGTCAACATAATTGGAAGAAACATGTTGACTCAGATTGGYTGTACTTTAAATTTT----TGGAAGAGGAAGGAAAAATTTCAAAAATTGGGCCTGAAAATCCATACAATACTCCAGTATTTGCTATAAAGAAAAAAGATAGTACTAAATGGAGGAAATTAGTAGATTTCAGAGARCTCAAAAGAACTCAGGACTTCTGGGAAGTTCAATTAGGA…
>AUT-500304882
AARGAAGCCCTATTAGAYACAGGAGCAGATGATACAGTATTAGAAGAAATGAATTTGCCAGGAAGGTGGAAACCAAAAATGATAGGGGGAATTGGAGGTTTTATTAAAGTAAGACAGTATGAGCAARTACCCATAGAAATCTGTGGAAATAAAGCRGTAGGTACAGTGTTARTAGGACCTACACCTGTCAACATAATTGGAAGAAATCTGTTGACTCAGATTGGTTGCACTTTAAATTTT----TGGAAAAGGAAGGGAAAATTWCAAGARTTGGGCCTGAAAATCCATATAATACTCCAGTATTTGCCATAAAGAAAAAAGACAGTACTAAATGGAGAAAATTAGTAGATTTCAGAGAACTTAAGAGAACTCAAGACTTCTGGGAAGTTCAATTAGGA…
>AUT-500304897
AAGGAAGCTCTATTAGATACRGGAGCAGATGATACAGTATTAGAAGAAATGAATTTGCCAGGAAGATGGAAACCAAAAATGATAGGGGGAATTGGAGGTTTTATCAAAGTAAAACAGTATGATCAAATACCCYTAGAAATCTGTGGAAAGAAAACTATAGGTACAGTATTAATAGGGCCTACACCTGTCAACATAATTGGAAGAAATCTGTTGACTCAGATTGGTTGTACTTTAAATTTT----TGGAAAAGGAAGGAAAAATTTCAAAAATTGGGCCTGAAAATCCATATAATACWCCAGTATTTGCTATAAAGAAAAARGACAGTACTAAATGGAGAAAGTTAGTRGATTTCAGAGAACTTAAGAAAACYCARGACTTYTGGGAAGTHCAATTAGGG…
>AUT-500305059
AAGGAAGCTCTATTAGATACAGGAGCAGWTGATACAGTATTAGAAGAAATGAATTTGCCAGGAAGATGGAAACCAAAAATGATAGGGGGAATTGGAGGTTTTATCAAAGTAAGACAGTATGATCAGATACCCATAGAAATTTGTGGACATAAAGCTATAGGTACAGTATTAATAGGACCTACACCTGTCAACATMATTGGAAGAAATCTGTTGACTCAGMTTGGYTGYACYTTAAACTTT----TGGAGAAGGAAGGAAAAATTTCAAAAATTGGGCCTGAAAAYCCATACAATACTCCAGTGTTTGCCATAAAGAAAAAAGACAGYACTAAATGGAGAAAATTAGTAGATTTCAGRGAACTTAARAGAACTCAAGACTTCTGGGAAGTYCAGTTRGGA…
>AUT-500305140
AAGGAAGCTCTATTAGATACAGGAGCAGATGATACAGTATTAGAAGACATAAATTTGCCAGGAAGATGGAAACCAAAAATGATAGGGGGAATTGGAGGTTTTATTAAAGTAAGACAGTATGATCAGATACWARTAGAAATTTGKGGACATAAAGCTATAGGTACAGTATTAGTAGGACCTACACCTGTCAACATAATTGGAAGAAATCTGTTGACTCAGATTGGCTGTACTTTAAATTTTGAAATGGAAAAGGAAGGGAAAATTTCAAAAATTGGACCTGAAAATCCATACAATACTCCAGTATTTGCCATAAAGAAAAAGGACAGTACTAAATGGAGAAAATTAGTAGATTTCAGAGAACTCAAGAAAACTCAAGACTTCTGGGAAGTTCAATTAGGA…
>AUT-500305231
AAGGAAGCTCTATTAGATACAGGGGCAGATGATACAGTATTAGAAGAGATGAGTTTACCAGGAAAATGGAAACCAAAGATGATAGGGGGAATTGGAGGTTTTATCAAAGTAAGACAATATGAGCAAGTACCCATAGAAATCTGTGGGCATACAGCTGTAGGTACAGTATTAATAGGACCTACWCCTGTCAACATAATTGGAAGAAACCTGTTGACTCAAATTGGTTGCACTTTAAATTTT----TGGAAAAAGAAGGAAAAATTTCAAAAATTGGGCCTGAAAATCCGTACAACACTCCAGTATTTGCTATAAAGAAAAAAGATAGTACTAAATGGAGAAAATTAGTAGACTTCAGAGAACTTAAGAGAACTCAAGACTTCTGGGAAGTTCAATTAGGA…
>AUT-500305271
AAAGAAGCTCTATTAGATACAGGAGCAGATGATACAGTRTTAGAAGAAATGAATTTRCCAGGAAGATGGAAACCAAAAATGATAGGGGGAATTGGAGGTTTTATCAAAGTAAGRCAGTATGATCAGATAGCCATAGAAATTTGTGGACATAARGCTATAGGTACAGTATTAATAGGACCTACACCTGTCAACATAATTGGAAGAAATCTGTTGACTCAGATTGGTTGYACKTTAAATTTT----TGGAGAAGGAAGGGAAAATTTCAAAAATTGGGCCTGAAAATCCATACAATACTCCAATATTTGCHATAAAGAAAAAGGACAGTACWAAATGGAGAAAATTAGTAGATTTCAGAGAACTYAAGARAACTCAAGACTTTTGGGAAGTTCAATTRGGA…
>AUT-500305632
AAGGAAGCTCTATTAGAYACAGGAGCAGATGATACAGTATTAGAAGAAATGAATTTRCCAGGAAGATGGAAACCAAAAATGATAGGGGGAATTGGAGGTTTTATCAAAGTAAGACAGTATGATCAGATACTCGTAGAAATCTGTGGACATARAGCTATAGGTACAGTATTGATAGGACCTACACCTGTCAACATAATTGGAAGAAATCTGTTGACTCAGATTGGCTGYACTTTAAATTTT----TGGAAAAGGAAGGAAAAATTTCAAAAATTGGGCCTGAAAATCCATACAATACTCCAGTATTTGCCATAAAGAAAAAGGACAGTACTAAATGGAGAAAATTAGTAGATTTCAGAGAACTTAAGAGAACTCAAGACTTCTGGGAGGTTCAGTTAGGA…
>AUT-500305635
AAAGAAGCTCTATTAGATACRGGAGCAGATGATACAGTATTAGAAGACATAWATTTGCCAGGAAAATGGAAACCAAGAATGATAGGGGGAATTGGAGGYTTYATCAAAGTAAAACAGTATGATCAGATATCTATAGAAATTTGTGGGAARAAAGCWATAGGTACAGTRTTAGTAGGACCTACACCTGTCAACATAATTGGAAGAAATATGTTGACCCAGATTGGMTGTACTYTAAATTTY----TGGAAAAGGAAGGAAAAATTTCAAAAGTTGGGCCAGAAAATCCATACAATACTCCAATATTTGCTATAAAGAAAAAAGACAGCACTAAATGGAGRAAATTAGTAGATTTCAGRGAGCTCAAAAGAACTCAAGACTTTTGTGAAGTTCAATTAGGG…
>AUT-500305860
AAGGAAGCTCTATTAGATACAGGAGCAGATGATACAGTATTAGAAGAAATGAATTTGCCAGGAAGATGGAAACCAAAAATGATAGGGGGAATTGGAGGTTTTATCAAAGTAAGACAGTATGATCAGATACTCATAGAAATTTGTGGACATAAAGCTATAGGTACAGTGTTAGTAGGACCTACACCTGTCAACATAATTGGAAGGAATTTGTTGACTCAGATTGGTTGCACTTTAAATTTT----TGGAAAAGGAAGGAAAAATTTCAAARATTGGGCCTGAAAACCCATACAATACTCCAGTATTTGCTATAAAGAAAAAAGACAGTACTAAATGGAGAAAATTAGTAGATTTCAGAGAACTTAAGAGAACTCAAGACTTCTGGGAAGTTCAATTAGGA…
>AUT-500306056
ATAGAAGCCCTATTAGATACAGGAGCAGATGATACAGTATTAGAAGAAATAAATTTACCAGGAAAATGGAAACCAAAAATGATAGGGGGAATTGGAGGTTTTATCAAAGTAAGACAGTATGATCAGATACCTATAGAAATTTGTGGRAAAAGGGCAGTAGGTACGGTATTAGTAGGGCCTACACCTGTCAACATAATTGGACGAAATATGTTGACTCAGATTGGTTGTACTTTAAATTTT----TGGAAAGGGAAGGAAAAATTTCAAAAATTGGGCCTGAAAATCCATACAACACCCCAGTATTTGCCATAAAGAAAAAGGATAGTACTAAATGGAGAAAATTAGTAGATTTCAGAGAACTCAAAAGAACTCAAGACTTCTGGGAGGTCCAATTAGGA…
>AUT-500306426
AAGGAAGCTCTATTAGATACAGGAGCAGATGATACAGTATTAGAAGACATAAATTTGCCAGGAAGATGGAAACCAAAAATGATAGGGGGAATTGGAGGTTTTATCAAAGTAAAACAGTATGATCAGGTACCCATGGAAATCTGTGGACATAAAGTTATGGGTACTATATTAGTAGGACCTACACCTGTCAACATAATTGGAAGAAATCTGTTGACTCAGCTTGGCTGTACTTTAAATTTT----TGGAAAAGGAAGGGAAAATTTCAAAAATTGGGCCTGAAAATCCATACAATACTCCAGTATTTGCCATAAAGAAAAAAGACAGTACTAAATGGAGAAAATTAGTAGATTTCAGAGAACTTAAGAGAACTCAAGACTTCTGGGAGGTTCAATTAGGA…
>AUT-500307084
AAGGAAGCTCTATTAGACACAGGAGCAGATGATACAGTATTAGAAGAAATAAATTTGCCAGGAAGGTGGAAACCAAAAATGATAGGGGGAATTGGAGGTTTTATCAAAGTAAGACAGTATGATCAGGTASCCATAGAAATCTGTGGACATAAAGCTATAGGTACAGTATTAGTAGGACCTACACCTGTTAACATAATTGGAAGAAATYTGTTAACTCAGCTTGGCTGCACTTTAAATTTT----TGGAAAAGGAAGGGAAAATTTCAAAAATTGGGCCTGAAAATCCATACAATACCCCAGTATTTGCCATAAAGAAAAAGGACAGTACTAAATGGAGAAAATTAGTAGATTTCAGAGAACTTAAGARAACTCAAGACTTCTGGGAAGTTCAGTTAGGA…
>AUT-500307090
AAGGAAGCTCTATTAGATACAGGAGCAGATGATACAGTATTAGAAGAAATGAATTTGCCAGGAAGATGGAAACCAAAAATGATAGGGGGAATTGGAGGTTTTATCAAAGTAAAACAGTATGAGCAAATACCCATAGAAATCTGTGAAAAGAAAGTTATAGGTACAGTATTAGTAGGACCTACACCTGTCAACATAATTGGAAGAAACCTGTTGACTCAGCTTGGTTGCACTTTAAATTTTGAAATGGAAAAGGAAGGRAAAATTTCAAAAATTGGGCCTGAAAATCCATATAATACTCCAGTCTTTGCTATAAAGAAAAAAGACAGTACTAAATGGAGAAAATTAGTAGATTTCAGAGAACTTAAGAGAACTCAAGACTTCTGGGAAGTTCAATTAGGA…
>AUT-500307092
AAGGAAGCTCTCTTAGATACAGGAGCAGATGATACAGTATTAGAAGAAATAAATTTGCCAGGAAAATGGAAACCAARAATGATAGGAGGAATTGGAGGTTTTATCAAAGTAAGACAGTATGATCAAATAGTTATAGAAATTTGTGGWAAAAAGGCTATAGGTTCAGTATTAGTGGGACCTACACCCGTCAACATAATTGGRAGAAATATGTTGACTCAACTTGGATGCACACTAAATTTTGAAATGGAAAAGGAAGGAAAAATTACAAAAATTGGGCCTGAAAATCCATATAACACTCCARTATTTGCCATAAAAAAGAAGGACAGTACTAAGTGGAGAAAATTAGTAGATTTCAGGGAACTCAAAAGAACYCAAGACTTTTGGGAAGTTCAATTAGGA…
>AUT-500307127
AAAGAAGCTCTGTTAGATACAGGAGCAGATGATACAGTATTAGAAGATATAAATTTGCAAGGAAAATGGAAACCAAAAATGATAGGGGGAATTGGAGGTTTTATCAAGGTAAGACAGTATGATCAGATACTTATAGAAATTTGTGGGAAAAAAGCTATAGGTACAGTATTAGTAGGACCTACACCTGTCAACATAATTGGAAGGAATATGTTGACCCAGATTGGTTGTACTCTAAATTTT----TGGAAAAGGAAGGAAAAATTTCAAAAATTGGGCCTGAAAATCCATACAATACTCCAATATTTGCAATAAAGAAAAAAGATAGTACTAAATGGAGAAAATTAGTAGATTTCAGAGAACTCAAAAGAACACAAGACTTTTGGGAAGTTCAATTAGGA…
>AUT-500307422
ARGGAAGCTCTATTAGATACAGGAGCAGATGATACAGTATTAGAAGAMATGMRTTTGCCRGGAAAATGGAAACCAAAAATGATAGGGGGAATTGGAGGTTTTATCAAAGTAAGACAGTATGATCAGATACCCATAGAAATCTGTGGGCATAAAACTATAGGTACAGTCTTAATAGGACCTACACCTGTCAACATAATTGGAAGAAATCTGTTGACTCAGCTTGGATGCACTYTAAATTTT----TGGAAAAGGAAGGAAAAATCTCAAAAATTGGGCCTGAGAATCCATACAATACTCCAGTATTTGCCATAAAGAAAAAAGACAGTACTAAATGGAGAAAATTAGTAGATTTCAGAGAACTTAAGAAAACTCAAGACTTCTGGGAGGTTCAATTAGGA…
>AUT-500307616
AAGGAAGCTCTATTAGATACAGGAGCAGATGATACAGTATTAGAAGAAATGAGTTTGCCAGGAAGATGGARGCCAAAAATGATAGGGGGAATTGGAGGTTTTATCAAAGTAAGACAGTATGATCAGATACCCATAGAAATTTGTGGACATAAAGCTATAGGTACGGTATTAATAGGACCTACACCTGTCAACATAATTGGAAGAAATCTGTTGACTCAGCTTGGTTGTACTTTAAATTTT----TGGAAAAGGAAGGRAAAATTTCAAAAATTGGGCCTGAAAATCCATACAATACTCCAGTATTTGCCATAAGGAAAAAAGACAGTACTAAATGGAGAAAATTAGTAGATTTCAGAGAACTTAAGAGAACTCAAGACTTCTGGGAGGTTCAACTAGGA…
>AUT-500308004
AAGGAAGCTTTATTAGATACAGGAGCAGATGATACAGTATTAGAAGAAATRCAGTTGCCAGGGAGATGGAAACCAAAAATGATAGGGGGAATTGGAGGTTTTATCAAAGTAAGACAGTATGATCAGATACTCATAGAAATTTGTGGACATAAAGCTATAGGTACAGTATTAGTAGGACCTACACCTGTCAACATAATTGGAAGAAACCTGTTGACTCAGATTGGCTGCACTTTAAATTTT----TGGAAAAGGAAGGAAAAATTTCAAAAATTGGGCCTGAAAATCCATACAATACTCCAATATTTGCAATAAAGAAAAAAGACAGTACTAARTGGAGAAAATTAGTAGATTTCAGAGAACTTAAGAGAACTCAAGACTTCTGGGAAGTTCAATTAGGA…
>AUT-500308187
AAGGAAGCTCTATTAGATACAGGAGCAGATGATACAGTAGTAGAAGAAATGAATTTGCCAGGAAAATGGAAACCAAAAATGATAGGGGGAATTGGAGGCTTTATCAAAGTAAGACAGTATGATCAAATACAGGTAGAAATCTGTGGRTATAAAGCTAYAGGTACAGTATTAGTAGGACCTACACCTGTCAACATAATTGGAAGAAATTTGTTGACTCAGATTGGTTGCACCCTAMATTTTGAAATGGAAAARGAAGGAAAAATTTCAAAAATTGGGCCTGAAAATCCATACAATACTCCAATATTTGCCATAAAGAAAAAAGACAGTACTAAATGGAGAAAATTAGTAGATTTCAGAGAACTTAAGAGRACTCAAGACTTCTGGGAGGTTCAACTAGGA…
>AUT-500308469
AAGGAAGCTTTATTAGATACAGGAGCAGATGATACAGTATTAGAGGAAATACAGTTGCCAGGGAGATGGAAACCAAAAATGATAGGGGGAATTGGGGGTTTTATCAAAGTAAGACAGTATGATCAGATACCCATAGAAATATATGGACATAAAGCTATAGGTACAGTACTAGTAGGACCTACACCTGTCAACATAATTGGAAGAAACCTGTTGACTCAGATTGGCTGCACTTTAAATTTT----TGGAAAAGGAAGGAAAAATTTCAAAAATAGGGCCTGAAAATCCATACAATACCCCAATATTTGCCATAAGGAAAAAAGACAGTACTAAATGGAGAAAATTAGTAGATTTCAGAGAACTTAAGAGAACTCAAGACTTCTGGGAAGTTCAATTAGGA…
>AUT-500308657
AAGGAAGCTCTATTAGATACAGGAGCAGATGATACAGTATTAGAGGATATGAATTTGCCAGGAAGATGGAAACCAAAAATGATAGGGGGAATTGGAGGTTTTATCAAAGTAAGACAGTATGATCAGATAAACATAGAAATTTGTGGACATAAAGCTATAGGTACAGTATTAGTAGGACCCACACCTGTCAACATAATTGGAAGAAATCTGTTGACTCAGCTTGGTTGCACTTTAAATTTT----TGGAAAAGGAAGGGAAAATTTCAAAAATTGGGCCTGAAAATCCATACAATACTCCAGTATTTGCCATAAAGAAAAAAGACAGTACTAAATGGAGAAAATTAGTAGATTTCAGAGAACTTAAGAGAACTCAAGACTTCTGGGAAGTTCAATTAGGA…
>AUT-500308681
AARGAAGCTCTATTAGATACAGGAGCAGATGATACAGTGTTAGAAGAAATGAATTTGCCAGGAAGATGGAAACCAAAAATGATAGGGGGAATTGGAGGTTTTATCAAAGTAARACAGTATGATCAGATATCCCTRGAAATCTGTGGTCATAAAGCTGTAGGTACAGTATTAATAGGACCTACACCTGTCAACATAATTGGACGRAATCTGTTGACTCAGATTGGTTGCACTTTAAATTTTGAAATGGAGAAGGAHGGAAAAATCTCAAAAATTGGGCCTGAAAATCCATACAATACTCCAGTATTTGCCATAAAGAAAAAAGACAGTACTAAATGGAGAAAATTAGTAGATTTTAGAGAACTTAAAAGAACTCAAGACTTCTGGGAAGTTCAATTAGGA…
>AUT-500308758
AAGGAAGCTCTATTAGATACAGGAGCAGATGATACAGTACTAGAAGAAATGTGTTTGCCAGGAAGGTGGAAACCAAAAATGATAGGGGGAATTGGAGGTTTTATCAAAGTAAGACAGTATGATCAGGTAYCCATAGAAATCTGTGGACATAAAGYTGAAGGTACAGTATTAATAGGACCTACACCTGTCAACATAATTGGAAGAAATCTGTTGACTCAGCTTGGTTGTACTTTAAATTTT----TGGAAAAGGAAGGAAAAATTTCAAAAATCGGGCCTGAAAATCCATACAATACTCCAGTATTTGCCATAAAGAAAAAAGACAGTACTAAATGGAGAAAATTAGTAGATTTCAGAGAACTTAAAAGAACTCAAGACTTCTGGGAAATTCAATTAGGG…
>AUT-500308818
AAGGAAGCTCTATTAGACACAGGAGCAGATGATACAGTATTAGAAGACATGARTTTGCCAGGAAGATGGAAACCAAAAATGATAGGGGGAATTGGAGGTTTTATCAAAGTAAAGCAATATGATCAGATACCCATAGAGATCTGTGGRCATAAAGCTATAGGTACAGTATTRGTAGGACCTACACCTGTCAACATAATTGGAAGAAATCTGTTGACTCAGATTGGTTGTACYTTAAATTTT----TGGAAAAGGAAGGGAAAATTTCAAAAATTGGGCCTGAAAATCCATACAATACTCCAATATTTGCMATAAAGAAAAAAGACAGTACTAAATGGAGAAAATTAGTAGATTTCAGAGAACTTAAGAGAACTCAAGACTTTTGGGAAGTTCAATTAGGA…
>AUT-500309089
AAGGAAGCTCTATTAGATACAGGAGCAGATGATACAGTATTAGAAGAAATGAATTTGCCAGGGAGATGGAAACCAAAAATGATAGGGGGAATTGGAGGTTTTATCAAAGTAAGACAATATGATCAAATACCCATAGAAATCGAGGGGCATAAAGCTATAGGTACAGTATTAATAGGACCTACACCTGTCAACATAATTGGAAGAAATCTGTTGACTCAGATTGGTTGCACTTTAAATTTT----TGGAAAAGGAAGGCAAAATCTCAAAAATTGGGCCTGAAAATCCATACAATACTCCAATATTTGCCATAAAGAAAAAAGACAGTACTAAATGGAGAAAATTAGTAGATTTCAGAGAACTTAAGAGAACTCAAGACTTCTGGGAAGTACAATTAGGA…
>AUT-500309439
AAGGAAGCTTTATTAGATACAGGAGCAGATGATACAGTATTAGAAGACATAAATTTGCCAGGAAAATGGAAACCAAAAATGATAGGGGGAATTGGAGGWTTTATCAAAGTAAAACAGTATGATCAAGTAGTCYTAGAAATTTGTGGACACAAGGCTGTAGGTTCAGTGTTAGTAGGACCTACGCCTGTCAACATAATWGGAAGAAATATGTTGACTCAGATTGGTTGCACTTTAAATTTT----TGGAAAAGGAAGGAAAAATTTCAAAAATTGGGCCTGAAAATCCATACAATACTCCAGTATTTGCCATAAAGAAAAAAGATAGTACTAAATGGAGAAAATTAGTAGACTTTAGAGAACTTAAAAGAACTCAGGATTTTTGGGAAGTTCAATTAGGR…
>AUT-500309935
AAGGAAGCCCTATTAGATACAGGAGCAGATGATACAGTATTAGAAGAAATGAGTCTGCCAGGAAGRTGGAAACCAAAAATGATAGGGGGAATTGGAGGTTTTATCAAAGTAAGACAGTATGATCAGGTAACCATAGAAATCAGTGGACATAAAGCTATAGGTACAGTATTAGTAGGACCTACACCTGTCAACATAATTGGAAGAAATCTGTTGACTCAGATTGGTTGCACTTTAAATTTT----TGGAAAAGGAAGGGAAAATTTCAAAAATTGGGCCTGAAAACCCATACAATACTCCAATATTTGCCATAAAGAAAAAAGATGGCACTAAATGGAGAAAATTAGTAGATTTCAGAGAACTTAAGAGGACTCAAGAYTTCTGGGAAGTTCAATTAGGA…
>AUT-500310278
AAGGAAGCTCTACTAGATACAGGAGCAGATGATACAGTATTAGAAGAAATGAGTTTGCCAGGGAAATGGAAACCAAAAATGATAGGGGGAATTGGAGGTTTTATCAAAGTAAGACAGTATGATCAAATACTCATAGAAATCTGTGGACATAAAGCTATAGGTACAGTATTAGTAGGACCCACACCTGTCAACATAATTGGAAGGAATCTGTTGACTCAGATTGGTTGCACTTTAAATTTT----TGGAAAAAGAAGGCAAAATTTCAAAAATTGGGCCTGAAAATCCATACAATACTCCAGTGTTTGCCATAAAGAAAAAAGACAGTACTAAATGGAGAAAATTAGTAGATTTCAGAGAACTTAAGAGAACTCAAGACTTCTGGGAAGTGCAATTAGGA…
>AUT-500310296
AAGGAGGCTCTCTTAGATACAGGAGCAGATGATACAGTATTAGAAGAAATAAATTTGCCAGGAAAATGGAAACCAAAAATGATAGGMGGAATTGGGGGTTTTATCAAAGTAAGACAATATGATCAAATACYTATAGAAATTTGTGGAAAAAAGGCTATYGGTACAGTATTAGTAGGACCTACACCTGTCAACATAATAGGAAGAAATATTCTGACTCAGCTTGGATGTACACTAAATTTT----TGGAGAAGGAAGGAAAAATTTCAAAAATTGGGCCTGAGAATCCATATAACACTCCAGTATTTGCYATAAAAAAGAAAGATAGTACCAAGTGGAGAAAATTAGTAGATTTCAGGGAACTTAAAAGAACTCAAGACTTTTGGGAAGTYCAATTAGGA…
>AUT-500310532
AAAGAAGCTCTATTAGATACAGGAGCAGATGATACAGTATTAGAAGACATGAATTTGCCAGGAAAATGGAAACCAAAAATGATAGGGGGAATTGGAGGTTTCATCAAAGTAAAACAGTATGATCAGATACCCATAGAAATTTGTGGACATAAAACTATAGGTACAGTATTAATAGGACCCACACCTGTCAACATAATTGGAAGAAATCTGTTGACTCAACTTGGTTGCACTCTAAATTTG----TGGAAAAGGAAGGGAAGATTTCAAAAATTGGGCCTGAAAACCCATACAATACTCCAGTGTTTGCCATAAAGAAAAAAGACAGTACTAAATGGAGAAAATTAGTAGATTTCAGAGAACTTAAAAGGACTCAAGACTTCTGGGAAGTTCAATTAGGA…
>AUT-500310632
AGGGAAGCTCTATTAGATACAGGAGCTGATGATACAGTATTAGAGGAAATAAATTTGCCAGGAAAATGGAAACCAAAAATGATAGGGGGAATTGGAGGTTTTATCAAAGTAAGACAGTATGATCACATACTCATAGAAATTTGTGGACATAAAGCTGTAGGTACAGTATTAGTAGGACCTACACCTGTCAACATAATTGGAAGAAATCTGTTGACCCAGATYGGTTGCACTTTAAATTTT----TGGAAAAAGAGGGAAAAATTTCAAAAATTGGGCCTGARAATCCATAYAATACTCCAGTATTTGCCATAAAGAAAAAAGACAGTACTAAATGGAGAAAATTAGTAGATTTTAGAGAACTTAAGAGAACTCAAGACTTCTGGGAAGTYCAAYTAGGA…
>AUT-500310633
AAGGAAGCCCTATTAGATACAGGAGCAGATGATACAGTATTAGAAGAAATGGATTTGCCAGGAAGATGGAAACCAAAAATGATAGGGGGAATTGGAGGTTTTATCAAAGTAAGACAGTATGATCAGATAGCCATAGAAATCTGTGGACATAAAGTTATAGGTACAGTATTAATAGGACCTACACCTGTCAACATAATTGGAAGAAATCTGTTGACTCAGCTTGGTTGTACTTTAAATTTT----TGGAAAARGAAGGGAAAATCTCAAAAATTGGGCCTGAAAACCCATACAATACTCCAGTATTTGCCATAAAAAAGAAGGACAGTACTAAATGGAGAAAATTAGTAGACTTYAGAGAACTTAAGAGAACTCAAGACTTCTGGGAAGTGCAATTRGGA…
>AUT-500310959
ATAGAAGCCCTATTAGACACAGGAGCAGATGATACAGTATTAGAAGAAATAAATTTATCAGGAAAATGGAAACCAAAAATGATAGGGGGAATTGGAGGTTTTATCAAAGTAAGACAATATGATCAGATACTTATGGAAATTTGTGGAAAAAGGGCCATAGGTACAGTATTAGTAGGACCTACACCTGTCAACATAATTGGACGAAATATGTTGACTCAGATTGGTTGTACTTTAAATTTT----TGGAAAAGGAAGGAAAAATTTCAAAAATTGGGCCTGAAAATCCATACAAYACTCCAATATTTGCCATAAAGAAAAARGACAGTACTAAATGGAGAAAATTGGTAGATTTCAGAGAACTCAAGAGAACTCAAGACTTCTGGGAGGTCCAATTAGGA…
>AUT-500311488
AAAGAAGCTCTATTAGAYACAGGAGCAGATGATACAGTATTAGAAGARATAAATTTGCCAGGAAAATGGAAACCAAAAATGATAGGGGGAATTGGAGGTTTTATCAAAGTAAGGCAATATGATCAGATAYCTATAGAAATTTGTGGAAAAAAGGCTATAGGTACAGTRTTAGTAGGACCTACACCTGTCAACATAATTGGACGAAATATGTTGACTCAGATTGGTTGCACTTTAAATTTCGAGATGGAAGAGGARGGAAAAATCTCAAAAATTGGGCCTGAAAATCCATACAATACTCCAGTATTTGCTATAAAGAAAAAGGATGGCACCAAATGGAGRAAATTAGTAGATTTCAGAGAGCTCAAAAGAACTCAGGAYTTTTGGGAAGTTCAATTAGGA…
>AUT-500311489
ARAGAAGCTCTATTAGATACAGGAGCAGATGATACAGTATTAGAAGATATAAATTTRCCAGGAAAATGGAAACCAAAAATGATAGGGGGAATTGGAGGTTTTATCAAAGTAAGACAATATGATCAGATACCTATAGAAATTTGTGGAAAAAAGGCTATAGGTACAGTRTTAGTAGGACCTACACCTGTCAACATAATTGGACGAAATATGTTGACTCAGATTGGTTGTACTTTAAATTTCGAGATGGAAAAGGAAGGAAAAATCTCAAAAATTGGGCCTGAAAATCCATACAATACTCCAATATTTGCTATAAAGAAAAAGGATGGCACCAAATGGAGRAAATTAGTAGATTTCAGAGAGCTTAAAAGAACTCARGACTTTTGGGAAGTTCAATTAGGA…
>AUT-500311490
AAAGAAGCTCTATTAGATACAGGAGCAGATGATACAGTATTAGAAGATATAAATTTGCCAGGAAAATGGAAACCAAAAATGATAGGGGGAATTGGAGGTTTTATCAAAGTAAGACAATATGATCAGATACCTATAGAAATTTGTGGAAAAAAGGCTATAGGTACAGTATTAGTAGGACCTACACCTGTCAACATAATTGGACGAAATATGTTGACTCAGATTGGTTGTACTTTAAATTC-GAGATGGAAAAGGAAGGAAAAATCTCAAAAATTGGGCCTGAAAATCCATACAATACTCCAATATTTGCTATAAAGAAAAAGGATGGCACCAAATGGAGGAAATTAGTAGATTTCAGAGAGCTTAAAAGAACTCAAGACTTTTGGGAAGTTCAATTAGGA…
>AUT-500311491
AAAGAAGCTCTATTAGATACAGGAGCAGATGATACAGTATTAGAAGATATAAATTTGCCAGGAAAATGGAAACCAAAAATGATAGGGGGAATTGGAGGTTTTATCAARGTAAAACAGTATGATCAGATACTTATAGAAATTTGTGGAAAAAAGGCTATAGGTACAGTATTAGTAGGACCTACACCTGTCAACATAATTGGAAGAAAYATGTTGACTCAGATTGGTTGTACTTTAAATTTTGARATGGAAAAGGAAGGAAAAATTTCAAAAATTGGGCCTGAAAATCCATACAAYACTCCAATATTTGCTATAAAGAAAAAAGATAGCACTAAATGGAGAAAATTAGTAGATTTTAGAGAGCTCAAAAGAACYCARGACTTCTGGGAAGTTCAATTAGGA…
>AUT-500311557
AAAGAAGCTCTATTAGATACAGGAGCGGATGATACAGTATTAGAAGATATGGATTTGCCAGGAAGATGGAAACCAAAAATGATAGGGGGAATTGGAGGTTTTATCAAAGTAAGACAGTATGATCAGGTACCCATGGAAATCTGTGGGCATAAAGCTATAGGTACAGTCTTAGTAGGACCTACACCTGTCAACATAATTGGAAGAAATCTGTTGACACAAATTGGATGCACTTTAAATTTT----TGGAAAAAGAAGGAAAAATTTCAAAAATTGGGCCTGAAAATCCATACAATACTCCAGTATTTGCCATAAAGAAAAAAGACAGTACTAAATGGAGAAAATTAGTAGATTTTAGAGAACTTAAGAAAACTCAAGACTTCTGGGAAGTTCAATTAGGA…
>AUT-500311563
AGGGAAGCTCTATTAGACACAGGAGCAGATGATACAGTATTAGAAGACATAAATTTACCAGGAAAATGGAAACCAAAAATGATAGGGGGAATTGGAGGTTTTATCAAAGTAAAACAGTATGATAACATAGCCATAGAYATTTGTGGACACAAGGCTATAGGTACAGTGTTGRTAGGACCTACGCCTGTCAACATAATTGGAAGAAATATGTTGACTCAGATTGGKTGTACATTAAATTTT----TGGAAAAGGAAGGAAAAATTTCAAAAATTGGGCCTGAAAATCCATACAATACTCCAGTATTTGCCATAAAGAAAAAAGACAGTACTAAATGGAGAAAATTAGTAGATTTCAGAGAACTTAAAAGAACTCAAGATTTTTGGGAGGTTCAATTAGGA…
>AUT-500311565
AAGGAAGCTCTATTAGATACAGGAGCAGATGATACAGTATTAGAAGAAATGARTTTGCCAGGAAAATGGAAACCAARAATGATAGGGGGAATTGGAGGTTTTATCAAAGTAAGACAGTATGATCAGATACCCATAGAAATCTGTGGACATAAAGCTATAGGTACAGTGTTAATAGGACCTACACCTGTCAACATAATTGGAAGAAATTTGTTGACTCAACTTGGGTGCACTCTAAATTTT----TGGARAAGGAAGGRAAAATTTCAAAAATTGGGCCTGAAAATCCATACAATACTCCARTATTTGCCATAAAGAAAAAGGACAGTACTAAATGGAGAAAATTAGTAGATTTCAGAGAACTTAAGAGAACTCAAGACTTCTGGGAAGTTCAATTAGGA…
>AUT-500311912
AAAGAGGCTCTTTTAGACACAGGAGCAGATGATACAGTATTAGAAGATATGAGTTTGCCAGGAAAATGGAAACCAAAAATGATAGGGGGAATTGGAGGTTTTATCAAAGTAAGACAGTATGATCAAATACCTATAGAAATTTGTGGAAAAAAGGCTATAGGTACAGTATTAGTAGGACCTACACCTGTCAATATAATTGGAAGAAATCTGTTAACTCAGCTTGGCTGCACTCTAAATTTT----TGGAAAAGGAAGGAAAAATTACAAAAATTGGGCCTGAAAATCCATATAATACTCCAGTATTTGCCATAAAAAAGAARGACAGTACTAAGTGGAGAAAATTAGTAGATTTCAGGGAACTTAAAAGAACTCAAGATTTTTGGGAGGTTCAATTAGGA…
>AUT-500311946
AAGGAAGCTCTATTAGATACAGGAGCAGATGATACAGTATTAGAAGAAATGAATTTGCCAGGAAGATGGAAACCAAAAATGATAGGGGGAATTGGAGGTTTTATCAAAGTRAGACAGTATGATCAGATACTCATAGAGATCTGTGGACATAAAGCTATAGGTACAGTATTAGTAGGACCTACACCTGTCAACATAATTGGAAGAAATCTGTTGACTCAGATTGGCTGCACTTTAAATTTTGAAATGGAAAAGGAAGGAAAAATTTCAAAAATTGGGCCTGAAAATCCATACAATACTCCAGTATTTGCCATAAAGAAAAAGGACAGTACTAAATGGAGAAAATTAGTAGATTTCAGAGAACTTAAGAGAACTCAAGACTTCTGGGAAGTTCAATTAGGA…
>AUT-500312483
AAGGAAGCTCTATTAGATACAGGAGCAGATGATACAGTACTAGAAGAAATGTGTTTGCCAGGAAGGTGGAAACCAAAAATGATAGGGGGAATTGGAGGTTTTATCAAAGTAAGACAGTATGATCAGGTACCCATRGAAATCTGTGGACATAAAGTTGAAGGTACAGTATTAATAGGACCTACACCTGTCAACATAATTGGAAGAAATCTRTTGACTCARCTTGGTTGTACTTTAAATTTT----TGGAAAAGGAAGGAAAAATTTCAAAAATCGGGCCTGAAAATCCATACAATACTCCAGTATTTGCCATAAAGAAAAAAGACAGTACTAAATGGAGAAAATTAGTAGATTTCAGAGAACTTAAAAGAACTCAAGACTTCTGGGAAATTCAATTAGGG…
>AUT-500312486
AAGGAAGCTCTRTTAGATACAGGAGCAGATGATACAGTAYTAGAAGAAATGWRTTTGCCAGGAAGRTGGAAACCAAAAATGATAGGGGGAATTGGAGGTTTTATCAAAGTAAGACAGTWTGATCAGRTACYCATAGAAATCTGYGGACATAAAGYTRWAGGTACAGTATTARTAGGACCTACACCTGTCAACATAATTGGAAGAAATCTGYTGACTCAGMTTGGYTGYACTTTAAATTTT----TGGAAAAGGAAGGAAAAATTTCAAAAATYGGGCCTGAAAATCCATACAATACTCCAGTATTTGCCATAAAGAAAAAAGACAGTACTAAATGGAGAAAATTAGTAGATTTCAGAGAACTTAARAGAACTCAAGAYTTCTGGGAARTTCAATTAGGG…
>AUT-500312798
AGAGAAGCTCTATTAGATACAGGAGCAGATGATACAGTATTAGAAGACATAAATTTGCCAGGAAAATGGAAACCAAAAATGATAGGGGGAATTGGAGGTTTTATCAAAGTAAGGCARTATGATCAGATACTTATAGAAATTTGTGGAAAAAAGGCTATAGGTACAGTATTAGTRGGACCTACACCTGTTAACATAATTGGACGAAATATGTTGACTCAGATTGGTTGTACTTTAAATTTT----TGGAAGAGGAAGGAAAAATTTCAAAAATTGGGCCTGAAAATCCATACAATACTCCAGTATTTGCTATAAAGAAAAAGGATAGCACCAAATGGAGGAAATTAGTAGATTTCAGAGAGCTCAAAAGAACTCAGGATTTTTGGGAAGTTCAATTAGGA…
>AUT-500312799
AGAGAAGCTCTATTAGATACAGGAGCAGATGATACAGTATTAGAAGAAATAAATTTGCCAGGAAAATGGAAACCAAAAATGATAGGGGGAATTGGAGGTTTTATCAAAGTAAGGCAATATGATCAGATACTTATAGAAATTTGTGGAAAAAAGGCTATAGGTACAGTRTTAGTAGGACCTACACCTGTTAACATAATTGGACGAAATATGTTGACTCAGATTGGTTGTACTTTAAATTTT----TGGAAGAGGAAGGAAAAATTTCAAAAATTGGGCCTGAAAATCCATACAATACTCCAGTATTTGCTATAAAGAAAAAGGATAGCACCAAATGGAGGAAATTAGTAGATTTCAGAGAGCTCAAAAGAACTCAGGATTTTTGGGAAGTTCAATTAGGA…
>AUT-500312851
AAGGAAGCTCTATTAGATACAGGAGCAGATGATACAGTGTTAGAAGAAATGAATTTGCCAGGAAGATGGAAACCAAAAATGATAGGGGGAATTGGAGGTTTTATCAAAGTAAGACAGTATGATCAGATATCCCTAGAAATCTGTGGTCATAAAGCTGTAGGTACAGTATTAATAGGACCTACACCTGTCAACATAATTGGACGGAATCTGTTGACTCAGATTGGTTGCACTTTAAATTTT----TGGAGAACGAAGGAAAAATYTCAAAAATTGGGCCTGAAAATCCATACAATACTCCAGTATTTGCCATAAAGAAAAAAGACAGTACTAAATGGAGAAAATTAGTAGATTTTAGAGAACTTAAAAGAACTCAAGATTTCTGGGAAGTTCAATTAGGA…
>AUT-500312885
AAAGAAGCTCTATTAGATACAGGAGCAGATGATACAGTATTAGAAGATATAAATTTGCCAGGAAAATGGAAACCAAAAATGATAGGGGGAATTGGAGGTTTTATCAAAGTAAGGCAATATGATCAGATACTTATAGAAATTTGTGGAAAAAAGGCTATAGGTACAGTGTTAGTAGGACCTACACCTGTCAACATAATTGGACGAAATATGTTGACTCAGCTTGGTTGTACTTTAAAYTTT----TGGAAAAGGAGGGAAAAATCTCAAAAATTGGGCCTGAAAACCCATACAATACTCCAGTATTTGCTATAAAGAAAAAGGACAGYACCAAATGGAGGAAGTTAGTAGATTTCAGAGAGCTGAAAAGAACTCAGGACTTTTGGGAAGTTCAATTAGGA…
>AUT-500313337
AAGGAAGCTTTATTAGATACAGGAGCAGATGATACAGTATTAGAAGAAATACAGTTGCCAGGGAGATGGAAACCAAAAATGATAGGGGGAATTGGAGGTTTTATCAAAGTAAGACAGTATGATCAGATACCCATAGAAATTTATGGACATAAAGCTATAGGTACAGTATTAGTAGGACCTACACCTGTCAACATAATTGGAAGAAACCTGTTGACTCAGATTGGCTGCACTTTAAATTTT----TGGAAAAGGAAGGAAAAATTTCAAAAATAGGGCCTGAAAATCCATACAATACTCCAATATTTGCCATAAGGAAAAAAGACAGTACTAAATGGAGAAAATTAGTAGATTTCAGAGAACTYAAGAGAACTCAAGACTTCTGGGAAGTTCAATTAGGA…
>AUT-500313520
AAAGAAGCYCTATTAGATACAGGAGCAGATGATACAGTATTAGAAGATATAAATTTGCCAGGAAAATGGAAACCAAAAATGATAGGGGGAATTGGAGGTTTTATCAARGTAAGGCAATATGATCAGATACTTATAGAAATTTGTGGRAAAAAGGCTATAGGTACAGTATTAGTAGGACCTACACCTGTCAACATAATTGGACGAAATATGTTGACTCAGATTGGTTGTACTTTAAATTTT----TGGAAGCRGAAGGAAAAATCTCAAAAATTGGGCCTGAAAATCCATACAATACTCCAGTATTTGCTATAAAGAAAAAGGACAGCACCAAATGGAGGAAATTAGTAGACTTCAGAGAGCTCAAAAGAACTCAGGATTTTTGGGAAGTTCAATTAGGA…
>AUT-500313521
AAGGAAGCTCTATTAGATACAGGAGCAGATGATACAGTACTAGAAGAAATGTGTTTGCCAGGAAGGTGGAAACCAAAAATGATAGGGGGAATTGGAGGTTTTATCAAAGTAAGACAGTATGATCAGGTAYCCATGGAAATCTGTGGACATAAAGTTGAAGGTACAGTATTAATAGGACCYACACCTGTCAACATAATTGGAAGAAATCTRTTGACTCARCTYGGTTGTACTTTAAATTTT----TGGAAAAGGAAGGAAAAATTTCAAAAATCGGGCCTGAAAATCCATACAATACTCCAGTATTTGCCATAAAGAAAAAAGACAGTACTAAATGGAGAAAATTAGTAGATTTCAGAGAACTTAAAAGAACTCAAGACTTCTGGGAAATTCAATTAGGG…
>AUT-500313572
AAAGAGGCTCTCTTAGACACAGGAGCAGATGATACAGTATTAGAAGACATAAATTTGCCAGGAAAATGGAAACCAAAAATGATAGGAGGAATTGGAGGTTTTATCAAAGTGAGACAATATGATCAAATACCTATAGAAATTTGTGGAAAAAAGGCTATAGGTACAGTTTTAGTAGGACCCACACCTGTCAACATAATTGGAAGAAATATGTTGACTCAGCTTGGATGCACACTAAATTTT----TGGAGAAGGAAGGAAAAATTACAAAAATTGGGCCTGAAAATCCATATAATACTCCAATATTTGCCATAAAAAAGAAGGACAGTACTAAGTGGAGAAAATTAGTAGATTTCAGGGAACTCAAAAGAACTCAAGATTTTTGGGAAGTTCAATTAGGA…
>AUT-500313748
AAGGAAGCCCTATTGGATACAGGAGCAGATGATACAGTATTAGAGGACATAAATTTGCCAGGAAGATGGAAACCAAAAATGATAGGGGGAATTGGAGGTTTTATCAAAGTAAAACAGTATGATCAAGTACCCATAGACATCTGTGGGCATAAAGCTATAGGTACAGTGTTAGTAGGACCTACACCTGTCAACATAATTGGAAGAAATATGTTGACTCAGCTTGGTTGCACTTTAAATTTT----TGGAAAAGGAAGGGAAAATTTCAAAAATTGGGCCTGAAAACCCATACAATACTCCAGTATTTGCCATAAAGAAAAAAGACAGTACTAAATGGAGAAAATTAGTAGATTTCAGAGAGCTTAAGAGAACTCAAGAATTCTGGGAAGTTCAATTAGGA…
>AUT-500314594
AAGGAAGCTCTATTAGACACAGGAGCAGATGATACAGTATTAGAAGACATAAATTTGCCAGGAAAATGGAAACCAAAAATGATAGGRGGAATTGGAGGTTTTATCAAAGTAAGACAGTATGATCAGATACCCMTAGAAATCTGTGGACATAAAGCTATAGGTACAGTATTAGTAGGACCTACACCTGTCAACATAATTGGAAGAAATCTGTTGACTCAAMTTGGTTGCACTTTAAATTTT----TGGAAAAGGAAGGAAAGATTTCAAAAATTGGGCCTGAAAATCCATACAATACCCCGGTATTTGCCATAAAGAAAAAAGACAGTACTAAATGGAGAAAATTAGTAGATTTCAGAGAACTTAAGAGAACTCAAGACTTCTGKGAAGTTCAATTAGGA…
>AUT-500314595
AAAGAAGCTCTATTAGATACAGGAGCAGATGATACAGTATTAGAAGAAATGAATTTGCCAGGAAAATGGAAACCAAAAATGATAGGGGGAATTGGAGGTTTTATCAAAGTAAGACAATATGATCAAATACACATAGAAATCTGTGGACATAAGGCTATAGGAACAGTGTTAGTAGGACCTACACCTGTCAACATAATTGGAAGAAATCTGTTGACTCAGATTGGTTGCACCTTAAATTTT----TGGAAAAGGAAGGAAAAATTTCAAAAATTGGACCTGAGAATCCATACAATACTCCAGTATTTGCCATAAAGAAAAAAGACAGTACTAAATGGAGAAAATTAGTAGATTTTAGAGAACTTAAGAGAACTCAAGACTTCTGGGAAGTACAATTAGGA…
>AUT-500314603
AAGGAAGCTCTATTAGACACAGGAGCAGATGATACAGTATTAGAAGAMATGAATTTGCCAGGAAAATGGAAACCAAAAATGATAGGAGGAATTGGAGGTTTTATCAAAGTAAGACAGTATGATCAGATACCCMTAGAAATCTGTGGACATAAAGCTATAGGTACAGTATTAGTAGGACCTACACCTGTCAACATAATTGGAAGAAATCTGTTGACTCAGATTGGTTGCACTTTAAATTTT----TGGAAAAGGAAGGAAAGATTTCAAAAATTGGGCCTGAAAATCCATACAATACTCCGGTATTTGCCATAAAGAAAAAAGACAGTACTAAATGGAGAAAATTAGTAGATTTCAGAGAACTTAAGAGAACTCAAGACTTCTGGGAAGTTCAATTAGGA…
>AUT-500315716
AAGGAAGCTCTATTAGATACAGGAGCAGATGATACAGTACTAGAAGAAATGAGTTTGCCAGGAAGGTGGAAACCAAAAATGATAGGGGGAATTGGAGGTTTTATCAAAGTAAGACAGTATGAACAGGTACCCATAGAAATCTGTGGACATAAAACAGAAGGTACAGTATTAATAGGACCTACACCTGTCAACATAATTGGAAGAAATCTGTTGACTCAGCTTGGTTGTACTTTAAATTTT----TGGAAAAGGAAGGAAAAATTTCAAAAATCGGGCCTGAAAATCCATACAATACTCCAGTATTTGCCATAAAGAAAAAAGACAGTACTAAATGGAGAAAATTAGTAGATTTCAGAGAACTTAAAAGAACTCAAGACTTCTGGGAAATTCAATTAGGG…
>AUT-600014358
AAGGAAGCTCTATTAGATACAGGAGCAGATGATACAGTATTAGAAGACATGARTTTRCCAGGGAGATGGAAACCAARAATGATAGGGGGAATTGGAGGTTTTATCAAAGTAAGACAGTATGATCAGATACCCATAGAAATMTGTGGGCATAAAGCTATRGGTACAGTATTAGTAGGACCTACACCTGTCAACATAATTGGAAGRAATCTGTTGACTCAGATTGGTTGCACTTTAAATTTTGAATTRGAAAAGGAAGRAAAAATTTCAAAAATTGGGCCTGAAAATCCATACAATACTCCARTATTTGCCATAAAGAAAAARAACAGTACTAAATGGAGAAAATTAGTAGATTTCAGRGAACTTAAGAAAACTCAAGACTTCTGGGAAGTTCAATTAGGA…
>AUT-600014360
AAGGAAGCTCTATTAGATACAGGAGCAGATGATACAGTATTAGAAGAAATGAGTTTGCCAGGAAAATGGAAACCAAGGATGATAGGGGGAATTGGAGGTTTTATCAAAGTAAGGCAATATGATCAGGTACCCATAGAAATCTGTGGACATAAAATTATGAGTACAGTATTAGTAGGACCTACACCGACCAACATAATTGGAAGAAATCTGATGACTCAGATTGGTTGTACTTTAAATTTTGAATTGGAAGAGGCAGGGAAAATTTCAAAAATTGGGCCTGAAAATCCATACAATACTCCAGTATTTGTMATAAAGAAAAAAGACAGTACTAAATGGAGAAAAGTAGTAGATTTCAGAGAACTTAAGAGAACTCAAGACTTCTGGGAAGTTCAATTAGGA…
>AUT-600014720
AAGGAAGCYCTATTAGATACAGGAGCAGATGATACAGTATTAGAAGACATRAATTTGCCAGGAAGATGGAAACCAAAAATGATAGGGGGAATTGGAGGTTTTATCAAAGTAAGACAGTATGATCAAGTATCCATGGAAATCTGTGGACATAAAGCTATAGGTACAGTATTAGTAGGACCTACACCTGTCAACATAATTGGAAGAAATCTGTTGACTCAGATTGGCTGCACTTTAAATTTTGAACTGGAAAAGGAAGGAAAAATTTCAAAAATTGGGCCTGAAAATCCATACAATACTCCAGTATTTGCCATAAAGAAAAAAGATAGTACTAAATGGAGAAAATTAGTAGATTTCAGAGAACTTAAGAGAACTCAAGACTTCTGGGAAGTTCAATTAGGA…
>AUT-600016661
AAGGAAGCTCTATTAGATACAGGAGCAGATGATACAGTATTAGAAGAAATGAATTTRCCAGGAAGATGGAAACCAAAAATGATAGGGGGAATTGGAGGKTTTATCAAAGTAAGRCAGTATGAYCAGATACCCATAGAAATCTGTGGACATAAAGCTATAGGTACAGTATTAGTAGGACCTACACCTGTCAACATAATTGGAAGAAATCTGTTGACTCAGATTGGTTGCACTTTAAATTTTGAACTGGAGAAGGAAGGGAAAATTTCAAAAATTGGGCCTGAAAATCCATATAATACTCCAATATTTGCCATAAAGAAAAAAGACAGTACTAAATGGAGAAAATTAGTAGATTTCAGAGAACTTAAGAAAACTCAAGACTTCTGGGAAATTCAATTAGGA…
>AUT-600100410
AAGGAAGCTCTATTAGATACAGGAGCAGATGATACAGTATTAGAAGAAATGGATTTGCCAGGAAGATGGARACCAAAAATGATAGGAGGAATTGGAGGTTTTATCAAAGTAAGACAGTATGATCAAATACCCATAGAAATCTGTGGAAATAAAGCTATAGGTACAGTATTAGTAGGACCTACACCTGTCAACATAATTGGAAGAAATCTGTTGACTAARATTGGTTGCACTTTAAATTTTGAAATGGAAAAGGAAGGGAAAATTTCAAAAATTGGGCCTGAAAATCCATATAATACTCCAGTATTTGCCATAAAGAAAAAGAACAGTACYAGATGGAGAAAATTAGTAGATTTCAGAGAACTTAAGAGAACTCAAGATTTCTGGGAAGTTCAATTAGGA…
>AUT-600107098
AAAGAAGCTCTATTAGATACAGGAGCAGATGATACAGTATTAGAAGACATGGATTTGCCAGGAAGATGGAAACCAAAGATGATAGGGGGAATTGGAGGTTTTATTAAAGTAAGACAGTATGATCAGATACACATAGAAATCTGTGGACATAAAGCTATAGGTACAGTATTAGTAGGACCTACACCTGTCAACATAATTGGAAGAAATTTGTTGACTCAGATTGGTTGCACTTTAAATTTTGAAATGGAAAAGGAAGGGAAAATTTCAAAAATTGGGCCTGAAAACCCATACAATACTCCAGTATTTGCCATAAAGAAAAAAGACAGTACTAAATGGAGAAAATTAGTAGATTTCAGAGAACTTAAAAGAACTCAAGACTTCTGGGAAGTTCAACTAGGA…
>AUT-600107214
AAGGAAGCTCTATTAGATACAGGAGCAGATGATACAGTATTAGAAGATATGAATTTGCCAGGAAAATGGARACCAAAAATGATAGGGGGAATTGGAGGTTTTATCAAAGTAAGACAGTATGATCAAATACCCATAGAAATCTGTGGACATAAAACTATAGGTACAGTATTAGTAGGACCTACACCTGTCAACATAATTGGAAGAAATCTGTTGACTCAGATTGGTTGYACTTTAAATTTTTTTCTGGAAGAGGAAGGGAAAATTTCAAAAATTGGGCCTGAAAATCCATATAATACTCCAGTATTTGCYATAAAGAAAAAGAACAGTACTRRATGGAGAAAATTGGTAGATTTCAGAGAACTTAAGAGAACTCAAGACTTCTGGGAAGTTCAATTAGGA…
>AUT-600107810
AAGGAAGCTCTATTAGATACAGGAGCAGACGATACAGTATTAGAAGAAATGAATTTGCCAGGAAGATGGAAACCAAAAATGATAGGGGGAATTGGAGGTTTTATCAAAGTAAGACAGTATGATCAGATAGCCATAGAAATYTGTGGACATAAAGCTATAGGTACAGTGTTARTAGGACCTACACCTGTCAACATAATTGGAAGAAATCTGTTGACTCAGATTGGTTGCACTTTAAATTTYGAAATGGAAAAGGAAGGGAAAATTTCAAAAATTGGGCCTGAAAATCCATACAATACTCCAGTATTTGCCATAAAGAAAAAGGACAGTACTAAATGGAGAAAATTAGTAGATTTCAGAGAACTTAAAAGAACTCAAGACTTCTGGGAAGTTCAATTAGGA…
>AUT-600108326
AAGGAAGCTCTATTAGATACAGGAGCAGATGATACAGTGTTAGAAGAAATGAGTTTGCCAGGAAGATGGAGACCAAAAATGATAGGGGGAATTGGAGGTTTTATCAAAGTAAGACAGTATGATCAGATACCTATAGAAATCTGTGGACATAAAGCTATAGGTACAGTATTAGTAGGACCTACACCTGTCAATATAATTGGAAGAAATCTGTTAACTCAAATTGGTTGYACTTTAAATTTTGAAATGGAAAAGGAAGGGAAAATTTCAAGGGTTGGGCCTGAAAATCCATACAATACTCCAGTATTTGCCATAAAGAAAAAAGACAGTACTAAATGGAGAAAATTAGTAGATTTCAGAGAACTTAAGAAAACYCAAGACTTCTGGGAAGTTCAATTAGGA…
>AUT-600108630
AARGAAGCTCTATTAGATACAGGAGCAGATGAYACAGTATTAGAAGATATGGARTTRCCAGGAAGATGGAGACCAAAAATGATAGGGGGAATTGGAGGTTTTATCAAAGTAARACAGTATGATCAGATACCCATAGAAATYTGTGGACATAAAACTGTAGGTACAGTATTAATAGGACCTACACCTGTCAACATAATTGGAAGAAATCTGTTGACTCAGATTGGTTGTACTTTAAATTTTGAAATGGAAAAGGAAGGRAARATTTCAAAAATAGGGCCTGAAAATCCATAYAATACTCCAGTATTTGCCATAAAGAAAAAMGACAGTACTAAATGGAGAAAATTAGTAGATTTCAGAGAACTTAAGAGAACTCAAGACTTCTGGGAAGTTCAATTAGGA…
>AUT-600108631
AAGGAAGCTCTATTAGATACAGGAGCAGATGATACAGTRGTAGAAGAAATGRCTTTGCCAGGAAGATGGAAACCAAAAATGATAGGGGGAATTGGAGGTTTTATCAAAGTAAGACAGTATGATCAAGTACYCGTAGAAATCTGTGGAMATAAAGCTATAGGTACAGTATTAGTAGGACCTACACCTGTCAACATAATKGGAAGAAATCTGTKGACTCAGATTGGTTGCACTTTAAATTTTGAAATGGAAAAGGAAGGGAAAATTTCAAAAATTGGGCCTGAAAATCCATATAATACTCCAGTATTTGCCATAAAGAAAAAAGACAGTACTARATGGAGAAARTTAGTAGATTTCAGAGAACTTAAGAGAACTCAAGACTTCTGGGAAGTTCAATTAGGA…
>AUT-600110392
AAAGAAGCTCTATTAGAYACAGGAGCAGATGATACAGTATTAGAAGAAATGAATTTGCCAGGAAGRTGGAAGCCAAAAATGATAGGRGGAATTGGAGGTTTTATCAAAGTAAGRCAGTATGATCAGATACCTATAGAAATYTGTGGACATAAAGCTAYAGGTACAGTATTAGTAGGACCTACACCTGTCAACATAATTGGAAGRAATCTGTTGACTCAGATTGGTTGCACTTTAAATTTTGAAATGGAAAAGGAAGGGAAAATTTCAAAAATTGGGCCTGAAAAYCCATACAATACTCCAATATTTGCCATAAAGAAAAAAGATGGTACTAAATGGAGAAAATTAGTAGATTTCAGAGAACTTAAGAGAACTCAAGACTTCTGGGAAGTGCAAYTAGGA…
>AUT-600110766
AAGGAAGCTCTATTAGATACAGGAGCAGATGATACAGTATTTGAAGAARTGCATTTGCCAGGAAGATGGAAACCAAAAATGATAGGGGGAATTGGAGGTTTTATCAAAGTAAAACAGTATGATCAGGTAGCMRTGGAAATCTGTGGACATAAAGCTRTAGGTACAGTATTAGTAGGACCYACACCTGTCAACATAATTGGAAGAAATCTGTTTACTCAGATTGGTTGCACTTTAAATTTTGAAATGGAAAAGGAAGGAAAAATTTCAAAAATTGGGCCTGAAAATCCATACAATACTCCAGTATTTGCCATAAAGAAAAAAGACAGTACTAAATGGAGAAAATTAGTAGATTTCAGAGAACTTAAGAAAACTCAAGACTTCTGGGAAGTCCAATTAGGA…
>AUT-600110866
AAGGAAGCTCTATTAGATACAGGAGCAGATGATACAGTATTAGAAGATATGAGTTTGCCAGGAAGATGGAAACCAAAAATGATAGGGGGAATTGGAGGTTTTATCAAAGTAAGACAGTATGATCAGRTAACCWTAGACATTTGCGGACATAWAGCTACAGGTACAGTATTAATAGGACCTACACCTGTCAACATAATTGGAAGAAATMTGTTGACTCAGATTGGCTGTACTTTAAATTTTGAAATGGAAAAGGAAGGAAAAATTTCAAAAATTGGGCCTGAAAATCCATACAATACTCCAGTATTTGCTATAAAGAAAAAAGACAGTACTAAATGGAGAAAATTAGTAGATTTCAGAGAACTTAAGAGAACTCAAGACTTCTGGGAAGTTCAATTAGGA…
>AUT-600110885
AAGGAAGCTCTATTAGATACAGGAGCAGATGATACAGTATTAGAAGAAATGAATTTGCCAGGWAGATGGAAACCAAAAATGATAGGGGGAATTGGAGGTTTTATCAAAGTAAGACAGTATGATCAGATACTCATAGAAATHTGTGGRCATAAAGCTATAGGTACAGTATTAGTAGGACCTACACCTGTCAACATAATTGGAAGAAATCTGTTGACTCAGATTGGCTGCACYTTAAATTTTGARYTGGAAAAGGAAGGGAAGATTTCAAAAATTGGGCCTGAAAATCCATACAATACTCCAGTATTTGCCATAAAGAAAAAGRACAGTACTAAATGGAGAAAATTAGTAGACTTCAGAGAACTTAAGARAACTCAAGACTTCTGGGAGGTTCAATTAGGA…
>AUT-600110888
AAGGAAGCTCTATTAGATACAGGAGCAGATGATACAGTATTAGAAGAAATRGATTTGCCAGGAAGATGGAAACCAAAAATGATAGGGGGAATTGGAGGTTTTATCAAAGTAAGRCAATATGATCAAGTACCCATAGAAATCTGTGGGCATAAAGCTGTAGGTACAGTATTAGTAGGACCYACACCTGTCAACATAATTGGAAGAAATCTGTTGACTCAGCTTGGTTGCACTTTAAATTTTGAAATGGAGAAGGAAGGGAAAATTTCAAAAATTGGGCCTGAAAATCCATATAATACTCCAGTATTTGCCATAAAGAAAAAARACAGTACTARATGGAGAAAATTAGTAGATTTCAGAGAACTTAAGAGAACTCAAGAYTTYTGGGAAGTTCAATTAGGG…
>AUT-600111166
AAGGAAGCTCTATTAGATACAGGAGCAGATGATACAGTATTAGAAGAAATGAATTTACCAGGAAGATGGAAGCCAAAAATGATAGGGGGAATTGGAGGTTTTATCAAAGTAAGACAGTATGATCAGATACTCATAGAAATCTGCGGACATAAAGCTATAGGTACAGTATTAATAGGACCCACACCTGTCAACATAATTGGAAGAAATCTGTTGACTCAGATTGGCTGCACTTTAAATTTTGAGATGGAAAAGGAAGGAAAAATTTCAAAAATTGGGCCTGAAAATCCATATAATACTCCAGTATTTGCCATAAASAAAAAAAATAGTACTAGATGGAGAAAATTAGTAGACTTCAGAGAACTTAAGAGAACTCAAGACTTCTGGGAAGTTCAATTAGGA…
>AUT-600111548
AAGGAAGCTCTATTRGATACAGGAGCAGATGATACAGTATTAGAAGAAATGAATTTGCCAGGAAGATGGAAACCAAAAATGATAGGGGGAATTGGAGGTTTTATCAAAGTAAGACAGTATGATCAGATACTAGTAGAAATYTGTGGRCATAAAGCTATAGGTACAGTATTAGTAGGACCTACACCTGTCAACATAATTGGAAGRAATCTGTTGACTCAGATTGGKTGCACTTTAAATTTTGAAATGGAAAAGGAAGGGAAGATTTCAAAAATTGGGCCTGACAATCCATACAATACTCCAATATTTGCCATAAAGAAAAAGAACAGTAMTAGATGGAGAAAATTAGTAGATTTCAGAGAACTTAAGAGAACTCAAGACTTCTGGGAGGTTCAGTTAGGA…
>AUT-600111558
AAGGAAGCTCTATTAGATACAGGAGCAGATGATACAGTATTAGAAGAAATGAATTTGYCAGGAAGATGGAARCCAAAAATGATAGGGGGAATTGGAGGYTTTATCAAAGTAAGACAGTATGATCAAATACYCATAGAAATCTGTGGRCATAAAGCTATAGGTACAGTRTTARTAGGACCTACACCTGTCAACATAATTGGAMGAAATCTGTTGACTCAGATTGGYTGCACTTTAAATTTTGAAATGGAGAAGGAAGGRAAAATTTCAAAAATTGGGCCTGAAAATCCATATAATACTCCAGTATTTGCCATAAASAAAAAGAACAGTRMTAGATGGAGAAAATTAGTAGATTTCAGAGAACTTAAGARAACTCAAGACTTCTGGGAAGTTCAATTAGGA…
>AUT-600111562
AAAGAGGCTCTATTAGATACAGGAGCAGATGATACAGTATTAGAAGAAATGGATTTGCCAGGAAGATGGAAACCAAAAATGATAGGGGGAATTGGAGGTTTTATCAAAGTAAGACAGTAYGATCAGATACCCATAGAAATCTGTGGGCATAGAGCTATAGGTACAGTATTAGTAGGACCTACACCTGTCAACATAATTGGAAGAAATYTGTTGACTCAAATTGGTTGCACTTTAAATTTTGAAATGGAAAAGGAAGGGAAAATTTCAAAAATYGGGCCTGAAAATCCATACAATACTCCAGTATTTGCCATAAAGAAAAAARACAGTACTAAATGGAGAAAATTAGTAGACTTCAGAGAACTTAAAAGRACTCAAGACTTCTGGGAAGTTCAATTAGGA…
>AUT-600111608
AAGGAAGCTCTATTAGATACAGGAGCAGATGATACAGTATTAGAAGAAATGAATTTGCCAGGAAGATGGAAACCAAAAATGATAGGGGGAATTGGAGGTTTTATCAAAGTAAGACAGTATGATCAGATACCCATAGAAATCTGTGGACATAAAGCTATAGGTACAGTATTAATAGGACCTACACCTGTCAACATAATTGGAAGAAATCTGTTGACTCAGATTGGCTGCACTTTAAATTTTGAAATGGAAAAGGAAGGAAAGATTTCAAAAATTGGGCCTGAAAATCCATACAATACTCCAATATTTGCCATAAAGAAAAAAAACAGTACTAAATGGAGAAAATTAGTAGATTTCAGRGAACTTAAGAGAACTCAAGACTTCTGGGAAGTTCARTTAGGA…
>AUT-600111775
AAAGAAGCTCTATTAGATACAGGAGCAGATGATACAGTATTAGAAGACATAAATTTGCCAGGAAAATGGAAACCAAAAATGATAGGGGGAATTGAAGGTTTCATCAAAGTAAAACAGTATGATCAGATACCTATAAAAATTTGTGAAAAAAAGGCTATAGGTACAGTATTGGTAGGACCTACACCTGTCAACATAATTGGAAAAAATATGTTGACCCAGATTGGTTGTACTTTAAATTTTGAAATAGAAAAGGAAGGAAAAATTTCAAAAATTGGGCCTAAAAATCCATACAATACTCCAATATTTGCTATAAAGAAAAAAGACAGCACTAAATGGAAAAAATTAGTAGACTTCAGAGAGCTCAAAAGAACTCAAGACTTTTGGGAAGTTCAATTAAAA…
>AUT-600111789
AAGGAAGCTCTATTAGATACAGGAGCAGATGATACAGTATTAGAAGAAATAAATTTGCCAGGAAAATGGAAACCAAAAATGATAGGAGGAATTGGAGGTTTTATCAAAGTAAGACAGTATGAGGAGGTACCCGTAGAAATCTGCGGACATAAAGCTATAGGTACAGTATTAATAGGACCTACACCTGTCAACATAATTGGAAGAAAYTTGTTGACTCAGCTTGGTTGCACTTTAAATTTTGAAATGGAAAAGGAAGGAAAAATCTCAAAGATTGGGCCTGAAAATCCATACAATACTCCAGTATTTGCCATAAAGAAAAAAGACAGTACTAAATGGAGAAAATTAGTAGATTTCAGAGARCTTAAGAGAACTCAAGACTTCTGGGAAGTTCAATTAGGA…
>AUT-600111843
AMGGAAGCTCTATTAGATACAGGAGCAGATGATACAGTATTAGAAGAAATGAATTTGCCAGGAAGATGGAAACCAAAAATAATAGGGGGAATTGGAGGTTTTATCAAAGTAAGACAGTATGATCAGATACCCATAGAAATCTGTGGACATAAAGCTATAGGTACAGTATTAGTAGGACCTACACCTGTCAACATAATTGGAAGAGATCTGWTGACTCAGCTTGGTTGCACTTTAAATTTTGAAYTRGAGAAGGAAGGAAAAATTTCAAAAATTGGGCCTGAAAATCCATATAATACTCCAGTATTTGCTATAAAGAAAAAAGACAGTACTAAATGGAGAAAATTAGTAGATTTCAGAGAACTTAAGAGAACTCAAGACTTCTGGGAAGTTCAATTAGGA…
>AUT-600112069
AAGGAAGCTCTAATAGATACAGGAGCAGATGATACAGTATTCGAAGAAATGAATTTGCCAGGAAGATGGAAACCAAAATTGATAGGGGGAATTGGAGGTTTTGTCAAAGTAAAACAGTATGATCAAATACCCATAGAAATCTGTGGACATAAAGCTATAGGTACAGTATTAATAGGACCTACACCTGCCAACATAATTGGAAGAAATCTGTTGACTCAGATTGGTTGCACTTTAAATTTTGAAATGGAAAAGGAAGGAAAAATTTCAAAAATTGGACCTGAGAATCCATATAATACTCCAGTATTTGCCATAAAGAAAAAGAACAGTGATAGATGGAGAAAATTAGTAGATTTCAGAGAACTTAAGAGAACTCAAGACTTCTGGGAAGTTCAATTAGGA…
>AUT-600112071
AAGGAAGCTCTRTTAGATACAGGAGCAGATGATACAGTATTAGAAGACATGAGTTTGCCAGGAAAATGGAAACCAAAAATGATAGGGGGAATTGGAGGTTTTATCAAAGTAAGACAGTATGATCAGATACCCATAGAAATCTGTGGACATAAAGCTATAGGTACAGTATTAGTRGGACCTACACCTGTCAACATAATTGGAAGAAATCTGTTGACTCAGATTGGTTGTACTTTAAATTTTGAATTGGAAAAGGAAGGGAAAATTTCAAAAATTGGGCCTGAAAATCCATACAATACTCCAGTATTTGCCATAAAGAAAAAAGACAGTACTAAATGGAGAAAATTAGTAGATTTCAGAGAACTTAAGAGAACTCAAGACTTCTGGGAAGTTCAATTAGGA…
>AUT-600112091
AAGGAAGCTCTATTAGATACAGGAGCAGATGATACAGTATTAGAAGAAATGAATTTGCCAGGAAGATGGAGACCAAAAATGATAGGGGGAATTGGAGGTTTTATCAAAGTAAGACAGTATGATCAGGTACCCATAGAAATTTGTGGAAATAAAGCTATAGGTACAGTATTAGTAGGACCTACACCTGTCAACATAATTGGGAGAAATCTGTTGACTCAGATTGGTTGCACTTTAAATTTTGAACTGGAGGAGGAAGGGAAAATTTCAAAAATTGGGCCTGAAAATCCATATAATACTCCAGTATTTGCCATAAAGAAAAAGAACAGTACTAAATGGAGAAAATTAGTAGATTTTAGAGAACTTAAGAGAACTCAAGACTTCTGGGAAGTCCAATTAGGA…
>AUT-600112096
AAGGAAGCTCTATTAGATACAGGAGCAGATGATACAGTATTAGAAGAMATGARYTTGRMAGGAARATGGAAACCAAAAATGATAGGRGGRAYTGGAGGTTTTATCAAAGTAAGACAGTATGATCAGATAACCATAGAAATCTGTGGACATAAAGTTACAGGTACAGTRTTAATAGGACCTACACCTGTCAACATAATTGGAAGAAATCTGTTGACTCAGCTTGGTTGCACTCTAAATTTTGAAATGGAAAAGGAAGGGAAAATTTCACAAATTGGGCCTGAAAATCCATACAATACTCCAGTATTTGCCATAAAGAAAAAAAACAGTACTAGATGGAGAAAATTAGTAGATTTCAGAGAACTTAAGAGAACTCAAGACTTYTGGGAAGTTCAATTAGGA…
>AUT-600112097
AAGGAAGCTCTATTAGATACAGGAGCAGATGATACAGTATTAGAAGAAATGGATTTACCAGGAAGATGGAAACCAAAAATGATAGGGGGAATTGGAGGTTTTATCAAGGTAAAACAGTATGATCAAATACCTGTAGAAATTTGTGGACATAAAGCTATAGGTACAGTATTAGTAGGACCTACACCTGTCAACATAATTGGAAGAAATCTGTTRACTCAAATTGGTTGCACTTTAAATTTTGAAATGGAAAAGGAAGGGAAAATTTCAAGAGTTGGGCCTGAAAATCCATATAATACTCCAATATTTGCCATAAAGAAAAAAAACAGTACTAGATGGAGAAAATTAGTAGATTTCAGAGAACTTAAGAAAACTCAAGACTTCTGGGAAGTTCAATTAGGA…
>AUT-600112098
AGGGAAGCTCTATTAGATACAGGAGCAGATGATACAGTATTAGAAGAAATAGATTTGCCAGGAAGATGGAAACCAAAAATGATAGGGGGAATTGGAGGYTTTATCAAAGTAAGACAGTATGATCARGTAMCCATGGAAATCTGTGGGAAAAAAGCTATAGGTACAGTATTAGTAGGACCTACACCTGTCAACATAATTGGAAGAAATCTGTTGACTCAGATTGGTTGCACTYTAAATTTTGAATTGGAAAAGGAAGGGAAAATTTCAAAAATTGGGCCTGAAAATCCATATAATACTCCAGTATTTGCCATWWASAAAAAAAACAGTACTARATGGAGAAAATTAGTAGATTTCAGGGAGCTTAAGAGAACTCAAGACTTYTGGGAAGTTCAATTAGGA…
>AUT-600112099
ARGGAAGCTCTATTAGATACAGGAGCAGATGATACAGTATTAGAAGAAATGGATTTGCCAGGAARATGGAAACCAAAAATGATAGGGGGAATTGGAGGTTTTATCAAAGTAAGACAGTATGATCARRTACYMRTAGAAATMTGTGGAAATAAAGCTATAGGTACAGTRTTAGTAGGACCTACACCTGTCAACATAATTGGAAGAAATCTGTTGACTCAGATTGGTTGCACTTTAAATTTTGAACTGGAAAAGGAAGGGAAAATTTCAAAAATTGGGCCTGAAAATCCATATAATACTCCAGTRTTTGCCATAAAGAAAAAGAACAGTACTAAATGGAGAAAATTAGTAGATTTCAGAGAGCTTAAGAAAACTCAAGACTTCTGGGAAGTTCAATTAGGA…
>AUT-600112107
AAGGAAGCTCTATTAGATACAGGAGCAGATGATACAGTATTAGAAGACATGAVTTTGYCAGGAAGATGGAAACCAAAAATGATAGGGGGAATTGGAGGTTTTATYAAAGTAAGACAGTATGATCAGATAYCYGTAGAAATYTGTGGACATAAAGCTATAGGTACAGTATTAGTAGGACCTACACCAGTCAACATAATTGGAAGAAATCTGTTGACTCAGATTGGTTGCACYTTAAATTTTGAAATGGAAMAGGAAGGAAAAATTTCAAAAATTGGGCCTGAAAATCCATACAATACTCCAGTATTTGCYATAAAGAAAAAARACAGTACTAGATGGAGAAAATTAGTAGATTTCAGAGAACTTAAGAGAACTCAAGACTTCTGGGARGTTCAATTAGGA…
>AUT-600112111
AAGGAAGCTCTATTAGATACAGGAGCAGATGATACAGTATTAGAAGAAATGAATTTGCCAGGAAGATGGAAACCAAAAATRATAGGGGGAATTGGAGGTTTTRTCAAAGTAARASAGTATGATCAGATASCCATAGAAATATGTGGACATAAAGYTATAGGTACAGTATTARTAGGACCTACACCTSYCAACATAATTGGAAGAAATCTGWTGACTCAGATTGGTTGCACCTTAAATTTTGAAYTGGAAAAGGAWGGAAARATTTCAAAAATTGGGCCTGAAAATCCATACAATACTCCAGTATTTGCCATAAAGAAAAAAGACAGYACTAAATGGAGAAAATTAGTAGATTTCAGAGAACTTAAGAAAACTCAAGACTTCTGGGAAGTYCAGTTAGGR…
>AUT-600112246
AAGGAAGCTCTATTAGATACAGGAGCAGATGATACAGTATTAGAGGAAATGAATTTRCCAGGGAGGTGGAAACCAAAAATGATAGGGGGAATTGGAGGTTTTATCAAAGTAAGACAGTATGATCAGATACCCATAGAAATCTGTGGGCATAAAGCCATAGGTACAGTATTAATAGGACCTACACCTGTCAACATAATTGGAAGAAATCTGTTGACTCAGCTTGGTTGCACTTTAAATTTTGAAWTRGAAAARGAAGGRAAAATTTCAAAAATTGGGCCTGAAAATCCATACAATACTCCAGTATTTGCCATAAAGAAAAARGACAGWACTAAATGGARAAAATTARTAGAYYTCAGAGAACTTAAGAAAACTCAAGACTTCTGGGAAGTTCAATTAGGA…
>AUT-600112631
AARGAAGCTCTATTAGAYACAGGAGCAGATGATACAGTATTAGAAGAAATGAATTTGCCAGGGAGATGGAAACCAAAAATGATAGGGGGAATTGGAGGTTTTATCAAAGTAAGACAGTATGATCAAGTACCCATAGAAATCTGTGGRAATAAAGCTRTAGGTACAGTATTAGTAGGACCTACACCTGTCAACATAATTGGAAGAAATCTGTTGACTCAGATTGGTTGCACTTTAAATTTTGAAATGGAAAARGAAGGGAAAATTTCAAAGATTGGGCCTGAAAATCCATATAATACTCCAGTATTTGCYATAAAGAAAAAARACAGTACTAGATGGAGAAAATTAGTAGATTTCAGAGAACTTAAGAGAACTCAAGACTTTTGGGAARTYCAATTAGGA…
>AUT-600112779
AAGGAAGCTCTATTAGATACAGGAGCAGATGATACAGTATTAGAAGAWRTRAATTTGYCAGGAARATGGAAACCAAAAATGATAGGGGGAATTGGAGGTTTTATCAAAGTAAGACAGTATGATCAGATATTAGTAGAAATCTGCGGACATAAAGCTATAGGTACAGTATTAGTAGGACCTACACCTGTCAACATAATTGGAAGAAATTTGTTGACTCAGATTGGTTGCACTTTAAATTTTGAAATGGAAAAGGAAGGGAAAATTTCAAAAATTGGGCCTGAAAATCCATACAATACTCCAGTATTTGCCATAAAGAAAAAGGACAGTACTAAATGGAGAAAATTAGTAGATTTTAGAGAACTTAAGAGAACTCAAGATTTYTGGGAAGTTCAATTRGGA…
>AUT-600112781
AARGAAGCTCTATTAGATACAGGAGCAGATGATACAGTATTAGAAGAAATGAATTTGCCRGGAAGATGGAAACCAAAAATGATAGGGGGAATTGGAGGTTTTATCAAAGTAAGACAATATGATCAGATACCYGTAGAAATCTGTGGCCATAAAGCTATAGGTACAGTATTAGTAGGACCTACACCTGTCAACATAATTGGAAGAAATCTGTTGACTCAGATTGGTTGTACTTTAAATTTTGAAATGGAAAAGGAAGGGAAAATTTCAAAAATTGGGCCTGAAAATCCATACAATACTCCAATATTTGCCATAAAGAAAAAAAACAGTACTAGATGGAGAAAATTAGTAGATTTCAGAGAACTTAAGAAAACTCAAGACTTCTGGGAAGTTCAATTAGGA…
>AUT-600113568
AAGGAAGCTCTATTAGATACAGGAGCAGATGATACAGTATTAGAAGAAATGAATTTGCCAGGAAGATGGAAACCAAAAATGATAGGGGGAATTGGAGGTTTTATCAAAGTAAGACAGTATGATCAAATACYCATAGAAATCTGTGGRCATAAAGCTATAGGTACAGTATTAGTAGGACCTACACCTGTCAACATAATTGGAAGAAATCTGTTGACTCAGATTGGTTGYACTTTAAATTTTGAACTGGAAAAGGACGGAAAAATTTCAAAAATTGGGCCTGAAAATCCATACAATACTCCAGTATTTGCYATAAAGAAAAAAGACAGTACTAAATGGAGAAAATTAGTAGATTTCAGAGAACTTAAGAGAACTCAAGACTTYTGGGAAGTTCAATTAGGA…
>AUT-600114484
AAGGAAGCTCTATTAGATACAGGAGCAGATGATACAGTATTAGAAGAAATGAATTTGCCAGGAAGATGGAAACCAAAAATGATAGGGGGAATTGGAGGTTTTATCAAAGTAAGACAGTATGATCARGTAAGCATAGAAATCTGTGGACATAARGCTATAGGTACAGTATTAGTAGGACCTACACCTGTCAACATAATTGGAAGAAATCTGTTGACTCAGATTGGTTGCACTTTAAATTTTGAATTGGAAAAGGAHGGGAAAATTTCAAAAATTGGGCCTGAAAATCCATACAATACTCCAGTATTTGCCATAAAGAARAARAATAGTACTAAATGGAGAAAATTAGTAGATTTCAGAGAACTTAAGAGAACTCAAGACTTCTGGGAAGTTCARTTAGGR…
>AUT-600114489
AAGGAAGCTCTATTAGATACAGGAGCAGATGATACAGTATTAGAAGAAATGAATTTGCCAGGAAGATGGAAACCAAAAATGATAGGGGGAATTGGAGGTTTTATCAAAGTAAGACAGTATGAYCAGATACCCATAGAAATCTGTGGACATAAAGCTAYAGGTACAGTATTAATAGGACCTACACCTGTCAACATAATTGGAAGGAATCTGTTGACTCAGATTGGTTGCACTTTAAATTTTGAACTGGAACAGGAAGGRAAAATTTCAAAAATTGGGCCTGAAAACCCATATAATACTCCAGTATTTGCCATAAAGAARAAGAACAGTACTAAATGGAGAAAATTAGYAGATTTCAGAGAACTTAAGARAACTCAAGACTTCTGGGAAGTCCAATTAGGA…
>AUT-600114496
ACGGAAGCTCTATTAGATACAGGAGCAGATGATACAGTATTAGAAGAAATGAATTTGTCAGGAARATGGAARCCAAARATAATAGGGGGAATTGGAGGTTTTATCAAAGTAAGACAGTATGATCAGATACCAGTAGAAATCTGCGGACATAAAGCTATAGGKACAGTATTAATAGGACCTACACCTGTCAACGTAATYGGAAGAAATCTGTTGACTCAGATTGGCTGCACTTTAAATTTTGAATTGGAACAGGAGGGGAAGATTTCAAAAATTGGGCCTGAAAATCCATACAATACTCCAGTATTTGCCATAAAGAAAAAGAACAGTACTAAATGGAGAAAATTAGTAGATTTCAGAGAACTTAAGAGAACTCAAGACTTCTGGGAAGTTCAATTAGGA…
>AUT-600114497
AAGGAAGCTCTAATAGATACAGGGGCAGATGATACAGTATTAGAAGAAATGGATTTGCCAGGAAGATGGAMACCAAAAATAATAGGGGGAATTGGAGGTTTTGTCAAAGTAAGACAGTATGATCAAATACCCATAGAAATCTGKGGACATAAAGCTATAGGTACAGTATTAGTAGGACCTACACCTGCCAACATAATTGGAAGAAATATGTTGACTCARATTGGTTGCACTTTAAATTTTGAATTGGAAAAGGAAGGGAAAATTTCAAAAATTGGGCCTGAAAATCCATATAATACTCCAGTATTTGCCATAAAGAAAAAGAACAGTACYAGATGGAGAAAATTAGTAGATTTCAGAGAACTTAAGAGAACTCAAGACTTCTGGGAAGTTCAATTAGGA…
>AUT-600114498
AAGGAAGCTCTATTAGATACAGGAGCAGATGATACAGTATTAGAAGACATGGATTTGCCAGGAAGRTGGAAACCAAAAATGATAGGGGGAATTGGAGGTTTTATCAAAGTAAGACAGTATGATCAGATACCCATAGAAATYTGTGGRCATAAAGCTATAGGTACAGTATTAGTAGGACCTACACCTGTCAACATAATTGGAAGAAAYCTGTTGACTCAGATTGGYTGCACTTTAAATTTTTWTCTGGAAAAGGAMGGGAAAATTTCAAAAATTGGGCCTGAAAATCCATATAATACTCCAGTATTTGCCATAAAGAAAAARRACAGTACTAAATGGAGAAAATTAGTAGATTTCAGAGAACTTAAGAGAACTCAAGACTTYTGGGAAGTTCAATTAGGA…
>AUT-600114502
AAGGAAGCTCTATTAGATACAGGAGCAGATGATACAGTATTAGAAGAAATRAATTTGCCAGGAAGATGGAAACCAAAAATGATAGGGGGAATTGGAGGTTTTATCAAAGTAAGACAGTATGATCAAATACCCGTAGAAATCTGTGGACATAARGCTATAGGTACAGTATTAGTAGGACCTACACCTGTCAACATAATTGGAAGAAATCTGTTGACTCAGATTGGTTGCACTTTAAATTTTGAATTGGAAGAGGMWGGGAAAATTTCRAAAATTGGGCCTGAAAATCCATATAATACTCCAGTATTTGCTATAAAGAAAAAARACAGTACTAAATGGAGAAAATTAGTAGATTTCAGAGAACTTAAGAGAACTCAAGACTTCTGGGAAGTTCAATTAGGA…
>AUT-600119761
AAGGAAGCTCTATTAGATACAGGAGCAGATGATACAGTATTAGAAGACATGAATTTGCCAGGAAGATGGAAACCAAAAATGATAGGGGGAATTGGAGGTTTTATCAAAGTAAGACAGTATGATCAAATACTCATAGAAATCTGTGGAAAGAAAGCTATAGGTACAGTATTAGTAGGACCTACACCTGTCAACATAATTGGAAGAAATCTGTTGACTCAGATTGGTTGCACTTTAAATTTTGAAATGGAAAAGGAAGGGAAAATTTCAAAAATTGGGCCTGAAAATCCATATAATACTCCAGTATTTGCCATAAAGAAAAAAGACAGTACTAGATGGAGAAAATTAGTAGATTTCAGAGAACTTAAGAAAACTCAAGACTTCTGGGAAGTTCAATTAGGA…
>AUT-600122105
AAGGAAGCTCTATTAGATACAGGAGCAGATGATACAGTATTAGAAGAAATAAATTTGCCAGGAAGATGGAAACCAAAAATGATAGGGGGAATTGGAGGTTTTATCAAAGTAAGACAGTATGATCAGATACCTATTGAAATCTGTGGCCATAAAGCTATAGGTACAGTATTAGTAGGACCTACACCTGTCAACATAATTGGAAGAAATATGTTGACTCAGATTGGTTGCACTTTAAATTTTGAAATGGAAAAGGAAGGGAAAATTTCAAAAATTGGGCCTGAAAATCCATACAATACTCCAGTATTTGCCATAAAGAAAAAAGACAGTACTAAATGGAGAAAATTAGTAGATTTCAGAGAACTTAAGAGAACTCAAGACTTCTGGGAAGTTCAATTAGGG…
>AUT-600122421
AAAGAAGCTCTATTAGATACAGGAGCGGATGATACAGTATTAGAAGAAATGGCTCTGCCAGGGAGATGGAGACCAAAAATGATAGGAGGAATTGGAGGWTTTATCMAAGTAAGACAGTATGATCAAAYWCCCATAGAAATCTGTGGACATAAAGCTATAGGTACAGTRTTAATAGGACCTACCCCTGTCAACATAATTGGAAGAAATCTGTTGACTCAGCTTGGTTGCMCTTTAAATTTTGAACTGGAAAAGGAAGGGAAAATTTCAAAAATTGGGCCTGAAAATCCATATAATACTCCAGTATTTGCCATAAAGAAAAAAGACAGTACTAAATGGAGAAAATTAGTAGATTTCAGAGAACTTAAGAGAACTCAAGACTTCTGGGAAGTTCAATTAGGA…
>AUT-600122751
AAGGAAGCTCTATTAGATACAGGAGCAGATGATACAGTATTAGAAGAAATGAATTTGCCAGGAAGATGGAAACCAAAAATGATAGGGGGAATTGGAGGTTTTATCAAAGTAAGACAGTATGATCAGATACTCATAGAAATCTGTGGACATAAAGCTATAGGTACAGTATTAGTAGGACCTACACCTGTCAACATAATTGGAAGAAATCTGTTGACTCAGATTGGTTGCACTTTAAATTTTGAAATGGAAAAGGAAGGAAAAATTTCAAAAATTGGGCCTGAAAATCCATACAATACTCCAGTATTTGCCATAAAGAAAAAGGACASTACTAAATGGARAAAATTAGTAGATTTTAGAGAACTTAAGAGAACTCAAGACTTYTGGGARGTTCAATTAGGA…
>AUT-600122764
AAGGAAGCTCTATTAGATACAGGAGCAGATGATACAGTATTAGAAGAAATGAATTTGCCAGGAAGATGGAAACCAAAAATGATAGGGGGAATTGGAGGTTTTATCAAAGTAAGACAGTATGATCAGATAGCCATGGAAATCTGTGGACATAAAGCTATAGGTACAGTATTAGTAGGACCTACACCTGTCAACATAATTGGAAGAAATCTGTTGACTCAGATTGGTTGCACTTTAAATTTTGAAATGGAAAAGGAAGGRAAAATTTCAAAAATTGGGCCTGAAAATCCATACAATACTCCAGTCTTTGCYATAAAGAAAAAAGACAGTACTAAATGGAGAAAATTAGTAGAYTTCAGAGAACTTAAGAAAACTCAAGACTTYTGGGAAGTTCAATTAGGA…
>AUT-600122777
AAGGAAGCTCTATTAGATACAGGAGCAGATGATACAGTATTAGAAGAAATGAATTTGCCAGGAAAATGGAAACCAAAAATGATAGGGGGAATTGGAGGCTTTATCAAAGTAAGACAGTATGATCAAATACTCATAGAAATCTGTGGACATAAAGCTATAGGTACAGTATTAGTAGGACCTACACCTGTCAACATAATTGGAAGAAATTTGTTGACTCAGATTGGTTGCACTTTAAATTTTGAAATGGAAAAGGAAGGAAAAATTTCAAAAATTGGGCCTGAAAATCCATACAATACTCCAATATTTGCCATAAAGAAAAAAGACAGTACTAAGTGGAGAAAATTAGTAGATTTCAGAGAACTTAAGAGAACTCAAGACTTYTGGGAAGTTCAACTAGGA…
>AUT-600122792
AAGGAAGCTCTATTAGATACAGGAGCAGATGATACAGTATTAGAAGAYATRAGTTTGCCAGGAAGATGGAAACCWAAAATGATAGGGGGAATTGGAGGTTTTATCAAAGTAAGACAGTATGATCAGATACYTATAGAAATATGTGGRCATAAAGCTATAGGTACAGTATTAGTAGGACCTACACCTGTCAACATAATTGGAAGAAATCTGTTGACTCAGATTGGTTGCACTTTAAATTTTGARATGGAAAAGGAAGGGAAAATTTCAAAAATTGGGCCTGAAAATCCATATAATACTCCAGTATTTGCYATAAAGAAAAAAGACAGTACTAAATGGAGAAAATTAGTAGAYTTCAGAGAACTTAAGAAAACTCAAGACTTYTGGGAAGTTCAATTAGGA…
>AUT-600123037
AAAGAAGCTCTATTAGATACAGGAGCAGATGATACAGTATTAGAAGAAATGAATTTGCCAGGAAGATGGAAACCAAAAATGATAGGGGGAATTGGAGGTTTTATCAAAGTAAGACAGTATGATCAAATACACATAGAAATAGATGGAAAGAAAGCTATAGGTACAGTATTAGTAGGACCTACACCTGTCAACATAATTGGAAGAAATCTGTTGACTCAGATTGGTTGCACTTTAAATTTTGAAATGGAAAAGGAAGGGAAAATTTCAAARRTTGGGCCTGAAAATCCATATAAYACTCCAGTATTTGCCATAAAGAAAAAAGACAGTACTAAATGGAGAAAATTAGTAGATTTCAGAGAGCTTAAGAGAACTCAAGACTTCTGGGAAGTTCAATTAGGA…
>AUT-600123237
AAGGAAGCTCTATTAGATACAGGAGCAGATGATACAGTATTAGAAGAAATGAATTTGCCAGGAAAATGGAGGCCAAAAATGATAGGGGGAATTGGAGGTTTTATCAAAGTAAGACAATATGATCAAATACCCATAGAAATCTGTGGACATAAGGCTATAGGTACAGTGTTAGTAGGACCTACACCTGTCAACATAATTGGAAGAAATCTGTTGACTCAGCTTGGTTGCACTTTAAATTTTGAAATGGAAAAGGAAGGGAAAATTTCAAAAATTGGGCCTGAAAATCCATATAATACTCCAATATTTGCTATAAAGAAAAAAGACAGTACTAAATGGAGAAAATTAGTAGATTTTAGAGAACTTAAGAAAACTCAAGACTTCTGGGAAGTTCAATTAGGA…
>AUT-600123238
AAGGAAGCTTTATTAGATACAGGAGCAGATGATACAGTATTAGAAGAAATGAATTTGYCAGGAAGATGGAAACCAAAAATGATAGGGGGAATTGGAGGTTTTATCAAAGTAAGACAATATGACCAGATATCCATAGAAATCTGCGGACAGAAAGCTATAGGTACAGTATTAATAGGACCTACACCTGTTAACATAATTGGAAGAAATCTGTTGACTCAGATTGGCTGCACTTTAAATTTTGAAATGGAAAAGGAAGGAAAAATTTCAAAAATTGGGCCTGAAAATCCATACAATACTCCAGTATTTGCCATAAAGAAAAAGGACAGTACTAAATGGAGAAAATTAGTAGATTTCAGAGAACTTAAGAGAACTCAAGACTTCTGGGAAGTCCAATTAGGA…
>AUT-600123239
AAGGAAGCTCTATTAGATACAGGAGCAGATGATACAGTATTAGAAGAAATGAATTTGCCAGGAAGATGGAAACCAAAAATGATAGGGGGAATTGGAGGTTTTATCAAAGTAAGACAATATGATCAGGTAARCATAGAAATCTGTGGACATAAAGCTATAGGTACGGTATTAGTAGGACCTACACCTGTCAACATAATTGGAAGAAATCTGTTGACTCAAATTGGTTGCACTTTAAATTTTGAAATGGAAAAGGAAGGGAAAATTTCAAAAATTGGGCTGAAAAATCCATACAATACTCCAGTATTTGCTATAAAGAAAAAAGACAGTACTAAATGGAGAAAATTAGTAGATTTCAGAGAACTTAAAAGAACTCAAGACTTCTGGGAAGTTCAATTGGGA…
>AUT-600123241
AAAGAAGCTCTATTAGATACAGGAGCAGATGATACAGTATTGGAAGAAATGAGTTTGTCAGGAAGATGGAAACCAAAAATGATAGGGGGAATTGGAGGTTTTATCAAAGTAAGACAGTATGATCAGATACTCATAGAAATCTGCGGRTATAAAGCTATAGGTACAGTATTAATAGGACCTACACCTGTCAACATAATTGGAAGAAATCTGTTGACTCAGATTGGTTGCACTTTAAATTTTGAAATGGAAAAGGAAGGGAAAATTTCAAAAATTGGGCCTGAAAATCCATACAATACTCCAGTATTTGCCATAAAGAAAAAAGACAGTACTAAGTGGAGAAAATTAGTAGATTTCAGAGAACTTAAGAGAACTCAAGACTTCTGGGAAGTTCAATTAGGA…
>AUT-600123242
AAGGAAGCTCTATTAGATACAGGAGCAGATGATACAGTATTAGAAGAAATGAATTTGCCAGGAAAATGGAAACCAAAAATGATAGGGGGAATTGGAGGTTTTATCAAAGTAAGACAGTATGATCAGATACCCATAGAAATCTGTGGACATAAAGCTATAGGTACAGTATTAGTAGGACCTACACCTGTCAACATAATTGGAAGAAATCTGTTGACTCAGCTTGGGTGCACTTTAAATTTTGAAATGGAAAAGGAAGGGAAAATTTCAAAAATTGGGCCTGAAAATCCATATAATACTCCAGTRTTTGCCATAAAGAAAAAAGACAGTACTAAATGGAGAAARTTAGTAGATTTCAGAGARCTTAAGAAAACTCAAGACTTCTGGGAAGTTCAATTAGGA…
>AUT-600123368
AAGGAAGCCCTATTAGATACAGGAGCAGATGATACAGTATTAGAAGAAATGAATTTGCCAGGAAGATGGAAACCAAAAATGATAGGGGGAATTGGAGGTTTTATCAAAGTAAGACAGTATGATCAGATACTCATAGAAATYTGTGGACATAAAGCYATAGGTACAGTATTAGTAGGACCTACACCTGTCAACATAATTGGAAGAAATCTGTTGACTCAGATTGGTTGCACTTTAAATTTTGAAHTGGAAAAGGAAGGRAAAATTTCAAAAATTGGGCCTGAAAATCCATAYAATACTCCAGTATTTGCCATAAAGAAAAAAAACAGTWCTAGATGGAGAAAATTAGTAGATTTCAGAGAACTTAAGARAACTCAAGACTTCTGGGARRTTCAATTAGGA…
>AUT-600124341
ATAGAAGCCCTATTAGACACAGGAGCAGATGATACAGTATTAGAAGAAATAGATTTACCAGGAAAATGGARACCAAAAATGATAGGGGGAATTGGAGGTTTTATCAAAGTAAGACAATATGACCAGATACTTCTAGAAATTTGTGGRAAAAAGGCCATAGGTACAGTATTAGTAGGACCAACACCTRTCAACATAATTGGACGAAATATGTTGACTCAGATTGGTTGTACTTTAAATTTTGAGATGGAAAAGGAAGGAAAAATTTCAAAAATTGGGCCTGAAAATCCATACAATACTCCAGTATTTGCCATAAAGAAAAAAGATAGTACTAAATGGAGAAAATTAGTAGATTTCAGAGAACTTAAGAGAACTCAAGACTTCTGGGAGATCCAATTGGGA…
>AUT-600124344
AAGGAAGCTCTATTAGATACAGGAGCAGATGATACAGTACTAGAAGAAATGAATTTGCCAGGAARATGGAAACCAAAAATGATAGGGGGAATTGGAGGTTTTATCAAAGTAAGACAGTATGATCAGATACTCATAGAAATCTGTGGACATAAAGCTATAGGTACAGTATTAGTAGGACCTACACCTGTCAACATAATTGGAAGGAATCTGTTGACTCAGATTGGGTGCACTTTAAATTTTGAAATGGAAAAGGAAGGGAAAATTTCAAAAATTGGGCCTGAAAATCCATACAATACTCCAGTATTTGCCATAAAGAAAAAAGACAGTACTAAATGGAGAAAATTAGTAGATTTCAGGGAACTTAAGAGAACTCAAGACTTCTGGGAAGTTCAATTAGGA…
>AUT-600124705
AAGGAAGCTCTATTAGATACAGGAGCAGATGATACAGTATTAGAAGAAATGAATTTGCCAGGAAGATGGAAACCAAAAATGATAGGGGGAATTGGAGGTTTTATCAAAGTAAGACAGTATGATCAGATACCCATAGAAATCTGTGGACATAAAGCTATAGGTACAGTATTAGTAGGACCTACACCTGTCAACATAATTGGAAGAAATCTGTTGACTCAGATTGGTTGCACYTTAAATTTTGAATTGGAAAAGGAAGGGAAAATTTCAAAAATTGGGCCTGAAAATCCATACAATACTCCAGTATTTGCCATAAAGAAAAAAGACAGTACTAAATGGAGAAAATTAGTAGATTTTAGAGAACTTAAGAGAACTCAAGACTTCTGGGAAGTTCAATTAGGA…
>AUT-600125241
AAAGAAGCTCTATTAGATACAGGAGCAGATGATACAGTACTAGAAGACATGGATTTGCCAGGAAGATGGAAACCAAAAATGATAGGGGGAATTGGAGGTTTTATCAAAGTAAGACAGTATGATCAGATACCCCTAGAAATCTGTGGACATAAAGTTATAGGTACAGTATTAATAGGATCTACACCTGTCAACATAATTGGAAGAAACCTGTTGACTCAGCTTGGTTGCACTTTAAATTTCGAAATGGAAAAGGAAGGGAAAATTTCAAAAATTGGGCCTGAAAATCCATACAATACTCCAGTATTTGCCATAAAGAAAAAAGACAGTACTAAATGGAGAAAATTAGTAGATTTCAGAGAACTTAAGAGAACTCAAGACTTCTGGGAAGTTCAATTAGGA…
>AUT-600125440
AAGGAAGCTTTATTAGATACAGGAGCAGATGATACAGTATTAGAAGACATGAGTTTGCCAGGAARATGGAAACCAAAAATGATAGGGGGAATTGGAGGTTTTATCAAAGTAAGACAGTATGATCAGATACCYRTAGAAATTTGYGGACATAAGGCTATAGGTACAGTATTAGTAGGACCTACACCTGTCAACATAATTGGAAGAAATTTGYTGACTCAGCTTGGTTGCACTTTAAATTTTGAAATGGAAAAGGAAGGAAAAATTTCAAAAATTGGGCCTGAAAATCCATACAATACTCCAGTATTTGCCATAAAGAAAAAGGACAGTACTAARTGGAGAAAATTAGTAGATTTCAGGGAACTTAAGAGGACTCAAGACTTYTGGGAAGTTCAATTAGGA…
>AUT-600125451
AAGGAAGCTCTATTAGATACAGGAGCAGATGAYACAGTATTAGAAGAYATGGATTTGCCAGGAAGATGGAAACCAAAAATGATAGGGGGAATTGGAGGTTTTATCAAAGTAAGACAGTATGATCAGATACCCATAGAAATCTGCGGACATAAAACYATAGGTACAGTACTAATAGGACCTACACCTGTCAACATAATTGGAAGAAATCTGTTGACTCAGCTTGGTTGCACTTTAAATTTTGAATTGGAGAAGGAAGGGAAAATCTCAAAAATTGGGCCTGAAAATCCATACAATACTCCAATATTTGCCATAARGAAAAAAGACAGTACTAAATGGAGAAAATTAGTAGATTTCAGAGAACTTAAAAGAACTCAAGACTTCTGGGAAGTTCAATTAGGA…
>AUT-600126713
AGAGAAGCTCTATTAGATACAGGAGCAGATGATACAGTATTAGAAGACATAGATTTGCCAGGGAAATGGAAACCAAAAATGATAGGGGGAATTGGAGGTTTTATCAAAGTAAAACAGTATGATCAGATACTTATAGAAATTTGTGGAAAAAAGGCTATAGGTACAGTRTTAGTAGGACCTACACCTGTCAACATAATTGGAAGAAACATGTTGACCCAGATTGGTTGYACTTTAAATTTCGAGATGGAAAAGGAAGGRAAAATTTCAAAAATTGGGCCTGAAAATCCATACAATACTCCAATATTTGCAATAAAGAAAAARGATAGCACTAAATGGAGAAAATTAGTAGATTTCAGAGAACTYAAAAGAACACAAGACTTTTGGGAAGTTCAATTAGGA…
>AUT-600128223
AAAGAAGCCCTGTTAGATACAGGAGCAGATGATACAGTATTAGAAGAMATGARTTTGCCAGGAAGATGGAAACCAAAAATGATAGGGGGAATTGGAGGTTTTATTAAAGTAAGACAATATGATCAGATACCCATAGAAATATGTGGACATAAGGCTACAGGTACAGTATTAGTAGGACCTACACCTGTCAACATAATTGGAAGAAATCTGTTGACTCAGATTGGTTGCACTTTAAATTTTGAAATGGAAAAGGAAGGGAAAATTTCAAAAATTGGGCCTGAAAATCCATATAATACTCCAGTATTTGCTATAAAGAAAAAAGATAGTACTAAATGGAGAAAATTAGTAGATTTCAGAGAACTTAAGAAGACTCAAGACTTYTGGGAAGTTCAATTAGGA…
>AUT-600128387
AAGGAAGCTCTATTAGATACAGGAGCAGATGATACAGTATTAGAAGAAATRAATTTGCCAGGAAGATGGAAACCAAAAATGATAGGGGGAATTGGAGGTTTTATCAARGTAAGACAGTATGATCAAATACTMATAGAAATCTGTGGGCATAAAGCTATAGGTACAGTATTAGTAGGACCTACACCTGTCAACATAATTGGAAGAAATCTGTTGACTCARATTGGTTGCACTYTAAATTTTGAAYTGGAGAAAGAAGGRAAAATTTCAAAAATTGGGCCTGAAAATCCATACAATACTCCAGTATTTGCCATAAAGAAAAAGGACAGTACTAAATGGAGAAAAKTRGTAGATTTCAGAGAACTTAAGAGAACTCAAGACTTCTGGGAAGTTCAATTAGGA…
>AUT-600128552
AAGGAAGCTCTATTAGATACAGGAGCAGATGATACAGTATTAGAAGAAATGAATTTGCCAGGAAGATGGAAGCCAAAAATGATAGGGGGAATTGGAGGTTTTATCAAAGTAAGACAGTATGATCAGATACTCATAGAAATCTGTGGACATAAAGCTATAGGTACAGTGTTAGTAGGACCTACACCTGTCAATATAATTGGAAGAAATYTATTGACTCAGATTGGTTGCACTTTAAATTTTGAAATGGAAAAGGAAGGGAAAATTTCAAAAATTGGGCCTGAAAATCCATACAATACTCCAGTATTTGCCATAAAGAAAAAAGACAGTACTAAATGGAGAAAATTAGTAGAYTTCAGAGAACTTAAGAAAACTCAAGACTTTTGGGAAGTTCAGTTAGGA…
>AUT-600128709
AAGGAAGCTCTATTAGATACAGGAGCAGATGATACAGTATTAGAAGACATGGATTTGCCAGGAAGRTGGAAACCAAAAATGATAGGGGGAATTGGAGGTTTTATCAAAGTAAGACAGTATGATCAAGTAWCCATGGAAATCTGTGGRCATAAAGCTATAGGTACAGTATTAGTAGGACCTACACCTGTCAACATAATTGGAAGAAATCTGTTGACTCAAATTGGCTGCACTTTAAATTTTGAAATGGAAAAGGAAGGAAAAATTTCAAAAATTGGGCCTGAAAATCCATACAATACTCCAGTATTTGCCATAAAGAAAAAAGATAGTACTAAATGGAGAAAATTAGTAGATTTCAGAGAGCTTAAGAGAACTCAAGACTTCTGGGAAGTTCAATTAGGA…
>AUT-600129177
AAGGAAGCTCTATTAGATACAGGAGCAGATGATACAGTATTAGAAGACATAGATTTACCAGGAAGATGGAAACCAAAAATGATAGGGGGAATTGGAGGTTTTATCAAAGTAAGACAGTATGATCAGATAMCCATGGAAATCTGCGGACATAAAGTTATAGGTACAGTGTTAATAGGACCTACACCTGTCAACATAATTGGAAGAAATCTGTTGACTCAGCTTGGTTGCACTTTAAATTTTGAAATGGAAAAGGAAGGGAAGATTTCAAAAATTGGGCCTGAAAATCCATACAATACTCCAGTATTTGCCATAAAGAAAAAGGACAGYACTAAATGGAGAAAATTAGTAGATTTCAGAGAACTCAAGAGAACTCAAGATTTCTGGGAAGTTCAATTAGGA…
>AUT-600129365
AAAGAAGCTTTATTAGATACAGGAGCAGATGATACAGTATTAGAAGAAATGAGTTTGCCAGGGAGATGGAAACCAAAAATGATAGGGGGAATTGGAGGTTTTATCAAAGTAAGACAGTATGATCAAATACTCATAGAAATCTGTGGACATAAAGCTATAGGTACAGTATTAATAGGACCTACACCTGTCAACATAATTGGAAGAAACTTGTTGACTCARATTGGCTGCACTTTAAATTTTGAATTGGAAAAGGAAGGAAAAATTTCAAAAATTGGGCCTGAAAATCCCTACAATACTCCAGTATTTGCCATAAAGAAAAAAAACAGTACTAAATGGAGAAAATTAGTAGATTTCAGAGAACTTAAGAGAACTCAAGACTTCTGGGAAGTTCAATTAGGA…
>AUT-600129686
AAGGAAGCTCTATTAGATACAGGAGCAGATGATACAGTATTAGAAGAAATAAATTTGCCAGGAAGATGGAAACCAAAAATGATAGGGGGAATTGGAGGTTTTATCAAAGTAAGACAGTATGATCAGATACTTATAGAAATATGTGGACATAAAGCTATAGGTACAGTATTAGTAGGACCTACACCTGTCAACATAATTGGAAGAAATCTGTTGACCCAGATTGGTTGCACTTTAAATTTTGAAATGGAAAAAGAAGGAAAAATTTCAAAGATTGGGCCTGAAAATCCATACAATACTCCAGTATTTGCCATAAAGAAAAAAGACAGTACCAAATGGAGAAAATTAGTAGATTTCAGAGAACTTAAGAGAACTCAAGACTTCTGGGAAGTTCAATTAGGA…
>AUT-600130050
AAGGAAGCTCTATTAGATACAGGAGCAGATGATACAGTATTAGAAGAAATGAATTTGCCAGGAAGATGGAAACCAAAAATGATAGGGGGAATTGGAGGATTTATCAAAGTAAGACAGTATGATCAAGTACCCATAGAGATCTGTGGAAATAAAGCTATAGGTACAGTATTAATAGGACCTACACCTGTCAACATAATTGGAAGAAATCTGTTGACTCAGATTGGTTGTACTTTAAATTTTGAAATGGAAAAGGAAGGGAAAATTTCAAAAATTGGGCCTGAAAATCCATATAATACTCCAGTGTTTGCCATAAAGAAAAAAGACAGTACTAAATGGAGAAAATTAGTAGATTTCAGAGAACTTAAGAAAACTCAAGACTTCTGGGAAGTTCAATTAGGA…
>AUT-600130734
AAGGAAGCTCTATTAGATACAGGAGCAGATGATACAGTATTAGAAGAMATGAATTTGCCAGGAAGATGGAAACCAAAAATGATAGGGGGAATTGGAGGYTTTRTCAAAGTAAGACAGTATGATCAGRTAMCCMTAGAMATCTGTGGACATAAAGCTRTAGGTACAGTRTTAGTAGGACCTACACCTGTCAACATAATTGGAAGAAATCTGTTGACTCAGATTGGKTGCACTTTAAATTTTGAAATGGAAAAGGAAGGGAAAATTTCAAAAATTGGGCCTGAAAATCCATACAATACTCCAGTATTTGCYATAAAGAAAAAAGAYAGTACTAAATGGAGAAAATTAGTRGATTTTAGAGAACTTAAGAGAACTCAAGACTTCTGGGAAGTTCAATTAGGA…
>AUT-600131941
AAGGAAGCTCTATTAGATACAGGAGCAGATGATACAGTATTAGAAGAAATGAATTTGCCAGGAAGATGGAAACCAAAAATGATAGGGGGAATTGGAGGTTTTATCAAAGTAAGACAGTATGATCAGATACACATAGAAATCTGTGGACATAAAGCTATAGGTACAGTATTAGTAGGACCCACACCTGTCAACATAATTGGAAGAAATCTGTTGACTCAGATTGGGTGCACTTTAAATTTTGAAATGGAAAAGGAAGGGAAAATTTCAAAAATTGGGCCTGAAAATCCATACAATACTCCAGTATTTGCCATAAAGAAAAAAGACGGTACTAAATGGAGAAAATTAGTAGATTTCAGAGAACTTAGGAAAACTCAAGACTTCTGGGAAGTTCAATTAGGA…
>AUT-600131957
AAAGAAGCTCTATTAGAYACAGGAGCAGATGATACAGTATTAGAAGATATAAATTTGCCAGGAAAATGGAAACCAAAAATGATAGGGGGAATTGGAGGTTTTATCAARGTAAGGCAATATGATCAGATACTTATAGAAATTTGTGGAAAAAGGGCCATAGGTACAGTRTTAGTAGGACCTACACCTGTCAACATAATTGGACGAAATATGTTGACTCAGATTGGYTGTACTTTAAATTTCGAGATGGAAGAGGAAGGAAAAATTTCAAAAATTGGGCCTGAAAATCCATAYAATACTCCAGTATTTGCTATAAAGAAAAAGGAYAGCACYAAATGGAGRAAATTAGTAGATTTCAGAGAGCTCAAAAGAACTCAGGACTTTTGGGAAGTTCAATTAGGA…
>AUT-600132180
AAAGAAGCTCTATTAGACACAGGAGCAGATGATACAGTATTAGAAGATATAAATTTGCCAGGAAAATGGAAACCAAAAATGATAGGGGGAATTGGAGGTTTTATCAAGGTAAGGCAATATGATCAGATACTTATTGAAATTTGTGGAAAAAGGGCTATAGGTACAGTATTAGTAGGACCTACACCTGTCAACATAATTGGACGAAATATGTTGACTCAGATTGGTTGTACTTTAAATTTCGAGATGGAAGAGGAAGGAAAAATTTCAAAAATTGGGCCTGAAAATCCATACAATACTCCAGTATTTGCTATAAAGAAAAAGGATAGCACCAAATGGAGGAAATTAGTAGATTTCAGAGAGCTCAAAAGAACTCAGGACTTTTGGGAAGTTCAATTAGGA…
>AUT-600132464
AAAGAAGCTCTATTAGATACAGGAGCAGATGATACAGTATTAGAAGACATGGATTTGCCAGGAAGATGGAAACCAAAAATGATAGGGGGAATTGGAGGTTTTATCAAAGTAAGACAGTATGATCAGATACCCCTAGAAATCTGTGGACATAAAGTTAYAGGTACAGTGTTAATAGGATCTACACCTGTCAACATAATTGGAAGAAATCTGTTGACTCAGCTTGGTTGCACTTTAAATTTCGAAATGGAAAAGGAAGGRAAAATTTCAAAAATTGGGCCTGAAAATCCATACAATACTCCAGTATTTGCCATAAAGAAAAAAGACAGTACTAAATGGAGAAAATTAGTAGATTTCAGAGAACTTAAGAGAACTCAAGACTTCTGGGAAGTTCAGTTAGGA…
>AUT-600132668
AAGGAAGCTCTATTAGATACAGGAGCAGATGATACAGTRTTAGAAGAAATGGATTTGCCAGGAAGATGGAGACCAAAAATGATAGGGGGAATTGGAGGTTTTATCAAAGTAAGACAGTATGATCAAATACCCATAGAAATCTGTGGACATAAAACTGAAGGTACAGTRTTAATAGGACCYACACCTGTCAACATAATTGGAAGAAATCTGTTGACTCAGMTTGGYTGCACTTTAAATTTTGAAATGGAAAAGGAAGGRAAAATTTCAAAAATTGGGCCTGATAAYCCATATAATACTCCAGTATTTGCYATAAAGAAAAAAGACAGTACTAARTGGAGAAAATTAGTAGATTTCAGAGAACTTAARAGAACTCAAGACTTCTGGGAAGTCCAGTTAGGR…
>AUT-600132852
AAGGAAGCTCTATTAGATACAGGAGCAGATGATACAGTATTAGAAGAAATGAGTTTGCCAGGAAGATGGAAGCCAAAAATGATAGGGGGAATTGGAGGTTTTATCAAAGTAAGACAGTATGATCAGGTACCCCTAGAAATCTGTGGACATAAAGCTATAGGTACAGTATTAGTAGGACCTACACCTGTCAACATAATTGGAAGAAATCTGTTGACTCAGATTGGTTGCACTTTAAATTTTGAAATGGAAAAGGAAGGGAAAATTTCAAAAATTGGGCCTGAAAATCCATACAATACTCCAGTATTTGCCATAAAGAAGAAAGACAGTACTAAATGGAGAAAATTAGTAGATTTCAGAGAACTTAAGAGAACTCAAGACTTCTGGGAGGTTCAACTAGGA…
>AUT-600133060
AGGGAGGCTCTRCTAGATACAGGAGCAGATGATACAGTATTAGAAGATATAAATTTGCCAGGAAAATGGAAACCAAAAATGATAGGGGGAATTGGAGGTTTTATCAAAGTAAAACAGTATGATARCATACTCATAGAAATTTGTGGACACAAGGCTATAGGTACAGTGTTGGTAGGACCTACGCCTGTCAACATAATTGGAAGAAACATGTTGACTCAGATTGGTTGTACTTTAAATTTTGAAATGGAAAAAGAAGGAAAAATTTCAAAAATTGGGCCTGAAAATCCATACAATACTCCAGTGTTTGCCATAARGAAAAAAGACAGTACTAAATGGAGAAAATTAGTAGATTTCAGAGAACTTAAAAGAACTCAAGATTTTTGGGAGGTTCAGTTAGGA…
>AUT-600133062
AAGGAGGCTCTCTTAGATACAGGAGCAGATGATACAGTATTAGAAGAAATAAATTTGCCAGGAAAATGGAAACCAAAAATGATAGGRGGAATTGGAGGTTTTATCAAAGTAAGACAGTATGAGGAAATACYTATAGAAATTTGTGGAAAAAAGGCTATAGGTACAGTRTTAGTRGGACCTACACCTGTTAACATAATTGGAAGGAATATGTTAACTCAGCTTGGATGTACACTAAATTTTGAAATGGARAAGGAAGGAAAAATTACAAAAATTGGGCCTGAAAATCCATATAACACTCCAGTATTTGCCATAAAAAAGAAGGACAGTACTAAGTGGAGAAAATTGGTAGATTTCAGGGAACTCAAAAGAACTCAAGACTTTTGGGAAGTTCAATTAGGA…
>AUT-600133063
AAGGAAGCTCTATTAGATACAGGAGCAGATGATACAGTATTAGAAGACATGAATTTGCCAGGRAGATGGAARCCAAAAATGATAGGGGGAATTGGAGGTTTTATCAAAGTAAGACAGTATGATCAGATACCAATAGAAATCTGTGGACATAAAGCTATAGGTACAGTATTAGTAGGACCTACACCTGTCAACATAATTGGAAGAAATCTGTTAACTCAGATTGGTTGCACTTTAAATTTTGAAATGGARAAGGAAGGGAAAATTTCAAAGATTGGRCCTGAAAATCCATACAATACTCCAGTATTTGCCATAAAGAAAAAAGACAGTACTAAATGGAGAAAATTAGTAGATTTCAGAGAACTTAAGARAACTCAAGACTTCTGGGARGTTCAATTAGGA…
>AUT-600133064
AAGGAAGCTCTATTAGATACAGGAGCAGATGATACAGTATTAGAAGAAATGGATTTGCCAGGGAGATGGAAACCAAAAATGATAGGGGGAATTGGAGGTTTTATCAAAGTAAGACAGTATGATCAGGTACCCATAGAAATCTGTGAACATAAAGCTATAGGTACAGTRTTAGTAGGACCTACACCTGTCAACATAATTGGAAGAAATCTGTTGACTCAGATTGGCTGCACTTTAAATTTTGAAATGGAAAAGGAAGGGAAAATTTCAAGAATTGGGCCGGAAAATCCATATAATACTCCAGTATTTGCCATAAAGAAAAAAGACAGTACTAAATGGAGAAAATTAGTAGATTTCAGGGAACTTAAGAAAACTCAAGACTTCTGGGAAGTTCAATTAGGA…
>AUT-600133068
AAGGAAGCTCTATTAGATACAGGAGCAGATGATACAGTATTAGAAGAAATGAATTTGCCAGGAAGATGGAAACCAAAAATGATAGGGGGAATTGGAGGTTTTATCAAAGTAAGRCAATATGATCAAGTGCCCATAGAAATTTGTGGAAATAAAGCTATAGGTACAGTATTAATAGGACCTACACCTGTCAACATAATTGGRAGAAATCTGTTGACTCAGATTGGTTGCACTTTAAATTTTGAAATGGAGAAGGAAGGGAAAATTTCAAAAATTGGGCCTGAGAATCCATATAATACTCCAGTATTTGCCATAAAGAAAAAAGACAGTACTAAATGGAGAAAATTAGTAGATTTTAGAGAACTKAAAAGAACTCAAGACTTCTGGGAAGTTCAATTAGGA…
>AUT-600133208
AAGGAAGCTCTATTAGATACAGGAGCAGATGATACAGTATTAGAAGAAATGGATTTGCCAGGGAGATGGAAACCAAAGATGATAGGGGGAATTGGAGGTTTTATCAAAGTAAGACAGTATGATCAGATACCCATAGAAATTTGTGGACATAAAGCTATAGGTACAGTATTAATAGGACCTACACCTGTCAACATAATTGGAAGAAATCTGTTGACTCAGCTTGGTTGCACTTTAAATTTTGAAATGGAAAAGGAAGGGAAAATTTCAAAAATTGGGCCTGAAAATCCATACAATACTCCAGTATTTGCCATAAAGAAGAAAGACAGTACTAAATGGAGAAAATTAGTAGATTTCAGAGAACTTAAGAGAACTCAAGACTTTTGGGAAGTTCAATTAGGA…
>AUT-600133210
AAAGAAGCTCTATTAGATACAGGAGCAGATGATACAGTATTAGAAGATATAAATTTGCCAGGAAAATGGAAACCAAAAATGATAGGGGGAATTGGAGGTTTTATCAAGGTAAGGCAATATGATCAGATAGTTATAGAAATTTGTGGAAAAAAGGCTATAGGTACAGTATTAGTAGGACCTACACCTGTCAACATAATTGGACGAAATATGTTGACTCAGATTGGTTGTACTTTAAATTTCGAGATGGAAGAGGAAGGAAAAATCTCAAAAATTGGGCCTGAAAATCCATACAATACTCCAGTATTTGCTATAAAGAAAAAGGATAGCACCAAATGGAGGAAATTAGTAGATTTCAGAGAGCTCAAAAGRACTCAGGACTTTTGGGAAGTTCAATTAGGA…
>AUT-600133229
AAAGAAGCTCTATTAGATACAGGAGCAGATGATACAGTATTAGAAGACATGGATTTGCCAGGAAGATGGAAACCAAAAATGATAGGGGGAATTGGAGGTTTTATCAAAGTAAGACAGTATGATCAGATACCCCTAGAAATCTGTGGACATAAAGTTATAGGTACAGTATTAATAGGACCTACACCTGTCAACATAATTGGAAGAAATCTGTTGACTCAGCTTGGTTGCACTTTAAATTTCGAAATGGAAAAGGAAGGGAAAATTTCAAAAATTGGGCCTGAAAATCCATACAATACTCCAGTATTTGCCATAAAGAAAAAAGACAGTACTAAATGGAGAAAATTAGTAGATTTCAGAGAACTTAAGAGAACTCAAGACTTYTGGGAAGTTCAATTAGGA…
>AUT-600133230
AAGGAAGCTCTATTAGATACAGGAGCAGATGATACAGTATTAGAAGAAATGAATTTGCCAGGAAGATGGAAACCAAAAATGATAGGGGGAATTGGAGGTTTTATCAAAGTAARACAGTATGATCAARYAYCCATAGAAATCTGTGGRCATAAARCTATAGGTACAGTATTARTAGGACCTACACCTGTCAACATAATTGGAAGAAATCTGTTGACTCAGCTTGGTTGCACTTTAAATTTTGAAATGGARAAGGAAGGGAAAATTTCAAAAATTGGGCCTGAAAATCCATATAATACTCCAGTATTTGCCATAAAGAAAAAAGACAGTACTAAATGGAGAAAATTAGTAGATTTCAGAGAACTTAAGAAAACTCAAGACTTYTGGGAAGTTCAATTAGGA…
>AUT-600133537
AAGGAAGCTCTATTAGATACAGGAGCWGATGATACAGTATTAGAAGAAATGAATTTGCCAGGRAGATGGARRCCRAAAATGATAGGRGGAATTGGAGGTTTTATCAAAGTRARACAGTATGATCAAATAYCCATAGAAATYTGTGGACAYAARGCTATAGGTACAGTATTAATAGGACCTACACCKGTCAACATAATTGGAAGAAATCTGTTGACTCARCTTGGTTGCACTTTAAATTTTGAAATGGAAAAGGAAGGGAAAATTTCAAAAATTGGGCCTGAAAATCCATATAATACTCCAGTATTTGCCATAAAGAAAAAAGACAGTACTAAATGGAGAAAAGTAGTAGATTTCAGGGAACTTAAGAAAACTCAAGACTTCTGTGAAGTTCAATTAGGA…
>AUT-600133656
AAGGAAGCTCTATTAGATACAGGAGCAGATGATACAGTAATAGAAGACATGAGTTTGCCAGGAAAATGGAAACCAAAAATGATAGGGGGAATTGGAGGTTTTATCAAAGTAAGACAGTATGATCAGATATCMTTAGAAATCTGTGGACATAAAGTTATAGGTACAGTATTAGTRGGACCTACACCTGTCAACATAATTGGAAGAAATCTGTTGACTCAGCTTGGTTGTACTTTAAATTTTGAATTGGAAAAGGAAGGAAAAATTTCAAAAATTGGGCCWGAAAATCCATACAATACTCCAGTATTTGCYATAAAGAAAAAARACAGTACTAAATGGAGAAAATTAGTAGATTTCAGAGAACTTAAGAGAACTCAAGACTTCTGGGAAGTTCAATTGGGA…
>AUT-600133710
AAAGAAGCTCTATTAGATACAGGAGCAGATGATACAGTATTAGAAGAAATGAGTTTGCCAGGGAAATGGAAACCAAAAATGATAGGGGGAATTGGAGGTTTTATCAAAGTAAGACAGTATGATCAAATACTTGTAGAAATCTGTGGACATAAAGCTATAGGTACAGTATTAGTAGGACCTACGCCTGTCAACATAATTGGAAGAAATCTGTTGACTCAGATTGGTTGCACTTTAAATTTTGAAATGGAAAAGGAAGGGAAAATTTCAAAAATTGGGCCTGAAAATCCATACAATACTCCAGTATTTGCCATAAAGAAAAAAGATGGTACTAAATGGAGAAAATTAGTAGATTTCAGAGAACTTAAGAGAACTCAAGAYTTCTGGGAAGTTCAGTTAGGA…
>AUT-600134041
MGGGAANNTCTATTAGACACAGGAGCAGATAATACAGTATTAGAAGACATAAATTTGCCAGGAAGATGGAAACCAAAAATGATAGGGGGAATTGGAGGTTTTATCAAGGTAAGACAGTATGATCARATACCCGTAGAGATCTGTGGRCATAAAGCTATAGGTACAGTATTAGTAGGACCTACACCTGTCAACATAATTGGAAGAGATCTGTTGACTCAGATTGGTTGCACTTTAAATTTTGAAATGGAAAAGGAAGGGAAAATTACAAAAATTGGGCCTGAAAATCCATATAATACTCCAGTATTTGCCATAAAGAAAAAAGACAGTACTARATGGAGAAAATTAGTAGATTTCAGAGAACTTAAAAGAACTCAAGACTTCTGGGAAGTTCAATTAGGA…
>AUT-600134078
AAGGAAGCTCTATTAGATACAGGAGCAGATGATACAGTATTAGAAGACATAGATTTACCAGGAAGATGGAAACCAAAAATGATAGGGGGAATTGGAGGTTTTATCAAAGTAAGACAGTATGATCAGRTACCCATAGAAATCTGTGGGCATAAAGCTATAGGTACAGTCTTAGTAGGACCTACACCTGTCAACATAATTGGAAGAAATCTGTTGACTCAAATTGGATGCACTTTAAATTTTGAAATGGAAAAGGAAGGAAAAATTTCAAAAATTGGGCCTGAAAATCCATACAATACTCCAGTATTTGCCATAAAGAAAAARGACAGTACTAAATGGAGAAAATTAGTAGATTTCAGAGAACTTAAGAAAACTCAAGACTTYTGGGAAGTTCAATTAGGA…
>AUT-600135145
AARGAGGCTCTCCTAGACACAGGAGCAGATGATACAGTATTAGAAGAAATAGATTTGCCAGGAAGATGGAAACCAAAAATGATAGGAGGAATTGGAGGTTTTATCAAAGTAAGACAGTATGATCAAATARCTATGGAAATTTGTGGAAAAAAGGCTATAGGTACAGTRTTAGTGGGACCTACACCTGTCAACATAATTGGRAGRAATATGTTGACTCARCTTGGCTGCACACTAAATTTTGAAATGGAGAAGGAAGGAAAAATTACAAAAATTGGGCCTGAAAAYCCATATAACACTCCARTATTTGCCATAAAAAAGAAGGACAGTACTAAGTGGAGAAAATTAGTAGATTTCAGGGARCTCAAAAGAACTCAAGACTTTTGGGAAGTTCAATTAGGA…
>AUT-600135347
AAAGAAGCTCTATTAGATACAGGAGCAGATGATACAGTATTAGAAGATATAAATTTGCCAGGAAAATGGAARCCAAAAATGATAGGGGGAATTGGAGGTTTTATCAAGGTAAAGCAATATGATCAGATACTTATAGAAATTTGTGGAAAAAAGGCTATAGGTACAGTRTTAGTAGGACCTACACCTGTCAACATAATTGGACGAAATATGTTGACTCAGATTGGTTGTACTTTAAATTTCGAGATGGAAGAGGAAGGAAAAATCTCAAAAATTGGGCCTGAAAATCCATACAATACTCCAGTATTTGCTATAAAGAAAAAGGACAGCACCAAATGGAGAAAATTAKTAGATTTCAGAGAGCTCAAAAGAACTCAGGACTTTTGGGAAGTTCAATTAGGA…
>AUT-600136159
ATAGAAGCCCTATTAGACACAGGAGCAGATGATACAGTATTAGAGGACATAAATTTACCAGGAAAATGGAAACCAAAAATGATAGGGGGAATTGGAGGTTTTATCAAAGTAAGACAATATGATCAGATACTTATGGAAATTTGTGGAAAAAGGGCCATAGGTACAGTATTAGTAGGACCTACACCTGTCAACATAATTGGACGAAATATGTTGACTCAGATTGGTTGTACTTTAAATTTCGATATGGAAAAGGAAGGGAAAATTTCAAAAATTGGGCCTGAAAATCCATACAACACTCCAATATTTGCCATAAAGAAAAAAGACAGTACTAAATGGAGAAAATTGGTAGATTTCAGAGAGCTCAAAAGAACTCAAGACTTCTGGGAGGTCCAATTAGGA…
>AUT-600136164
AAGGAAGCTCTRTTGGATACAGGAGCAGATGATACAGTATTAGARGAAATGAATTTGCAAGGAAAATGGAAACCAAAAATGATAGGGGGAATTGGAGGTTTTATCAAAGTAAGGCAGTATGATCAGGTACCCATAGAAATCTGTGGACATAAARCTATAGGTACAGTATTAGTAGGACCTACACCTGTCAACATAATTGGAAGAAATCTGTTGACTCAGCTTGGTTGCACTYTAAATTTTGAAATGGAAAAGGAAGGAAAAATTTCAAAAATTGGGCCTGAAAATCCATACAATACTCCAGTATTTGCCATAAAGAAAAAAGACAGTACTAAATGGAGAAAATTAGTAGACTTCAGGGAACTTAAGAAAACTCAAGATTTCTGGGAAGTTCAATTAGGA…
>AUT-600136368
AAAGAAGCTCTATTAGATACAGGAGCAGATGATACAGTATTAGAAGATATAAATTTGCCAGGAAAATGGAAGCCAAAAATGATAGGGGGAATTGGAGGTTTTATCAAGGTAAAGCAATATGATCAGATACTTATAGAAATTTGTGGAAAAAAGGCTATAGGTACAGTATTAGTAGGACCTACACCTGTCAACATAATTGGACGAAATATGTTGACTCAGATTGGTTGTACTTTAAATTTCGAGATGGAAGAGGAAGGAAAAATCTCAAAAATTGGGCCTGAAAATCCATATAATACTCCAGTATTTGCTATAAAGAAAAAGGACAGCACCAAATGGAGGAAATTAGTAGATTTCAGAGAGCTCAAAAGAACTCAGGACTTTTGGGAAGTTCAATTAGGA…
>AUT-600136369
AAAGAAGCTCTATTAGATACAGGAGCAGATGATACAGTATTAGAAGATATAAATTTGCCAGGAAAATGGAAGCCAAAAATGATAGGGGGAATTGGAGGTTTYATCAAGGTAAAGCAATATGATCAGATACTTATAGAAATTTGTGGAAAAAAGGCTATAGGTACAGTATTAGTAGGACCTACACCTGTCAACATAATTGGACGAAATATGTTGACTCAGATTGGTTGTACTTTAAATTTCGAGATGGAAGAGGAAGGAAAAATCTCAAAAATTGGGCCTGAAAATCCATAYAATACTCCAGTATTTGCTATAAAGAAAAAGGACAGCACCAAATGGAGGAAATTAGTAGATTTCAGAGAGCTCAAAAGAACTCAGGACTTTTGGGAAGTTCAATTAGGA…
>AUT-600136476
AAAGAAGCTCTATTAGATACAGGAGCAGATGATACAGTATTAGAAGATATAAATTTGCCAGGAAAATGGAAACCAAAAATGATAGGGGGAATTGGAGGTTTTATCAAAGTAAGGCARTATGATCAGATACTTATAGAAATTTGTGGAAAAAGGGCTATAGGTACAGTATTAGTAGGACCCACACCTGTCAACATAATTGGACGAAATATGTTGACTCAGATTGGYTGTACTTTAAATTTCGARATGGAAGAGGAAGGAAAAATCTCAAAAATTGGGCCTGARAATCCATACAATACTCCAGTATTTGCTATAAAGAAAAAGGACAGCACCAAATGGAGGAAATTAGTAGACTTCAGAGAGCTCAAAAGAACTCAGGAYTTTTGGGAAGTTCAATTAGGA…
>AUT-600137091
AAGGAAGCTCTATTAGATACAGGAGCAGATGATACAGTATTAGAAGAAATGAATTTGCCAGGAAGATGGAAACCAAAAATGATAGGGGGAATTGGAGGTTTTATCAAAGTAARACARTATGATCAARTACCCATAGAAATMGATGGWAAGAARGCCATAGGTACAGTATTAGTAGGACCTACACCTGTCAACATAATTGGAAGAAATCTGTTGACTCAGATTGGTTGCACTTTAAATTTTGAAATGGAAAAGGAAGGGAAAATTTCAAAAATTGGGCCTGAAAATCCATATAATACTCCAGTATTTGCCATCAAGAAAAAAGACAGTACTAAATGGAGAAAATTAGTAGATTTCAGAGAGCTTAAAAGAACTCAAGAYTTYTGGGAAGTTCAATTAGGA…
>AUT-600138008
AAAGAAGCTCTATTAGATACAGGAGCAGATGATACAGTATTAGAAGACATAAATTTGCCAGGAAAATGGAAACCAAAAATGATAGGGGGAATTGGAGGTTTTATCAAGGTAAGACAGTATGATCAGATACTTATAGAAATCTGTGGAAAAAAGGCTATCGGTACGGTATTAGTAGGACCTACCCCTGTCAACATAATTGGAAGAAACATGTTGACTCAGCTTGGTTGTACTTTAAATTTTGAGATGGAAAAGGAAGGAAAAATTTCAAAAATTGGGCCTGAAAATCCATACAATACTCCAGTATTTGCTATAAAGAAAAAAGACAGCACTAAGTGGAGGAAATTAGTAGATTTCAGGGAGCTCAAAAGAACTCAGGACTTTTGGGAAGTTCAATTAGGA…
>AUT-600138199
AAAGAAGCTCTATTAGATACAGGAGCAGATGATACAGTATTAGAAGACATGGATTTGCCAGGAAGATGGAAACCAAAAATGATAGGGGGAATTGGAGGTTTTATCAAAGTAAGACAGTATGATCAGATACCCATAGAAATCTGCGGGCATAAAGCWGTAGGTACAGTRTTAATAGGACCTACACCTGTCAACATAATTGGAAGAAATCTGTTGACTCAGCTTGGTTGCACTTTAAATTTTGAAATGGAAAAGGAAGGGAAAATCTCAAAAATTGGGCCTGAAAATCCATACAATACTCCAGTATTTGCAATAAAGAAAAAAGACAGTACTAAATGGAGAAAATTAGTAGATTTCAGGGAACTTAAAAGAACTCAAGACTTCTGGGAAGTTCAATTAGGA…
>AUT-600138606
AAGGAAGCTCTATTAGATACAGGAGCAGATGATACAGTATTAGAAGAAATGAATTTGCCAGGAAGATGGAAACCAAAAATAATAGGGGGAATTGGAGGTTTTGTCAAAGTAAGACAGTATGACCAGATACCCATAGAAATCTGTGGACATAAAGCTATAGGTACAGTATTAGTAGGACCTACACCTGCCAACATAATTGGAAGAAATCTGTTRACCCAGATTGGTTGCACTTTAAATTTTGAACTGGAAAAAGAAGGGAAAATTTCAAAAATTGGACCTGAAAATCCATATAATACTCCAGTATTTGCCATAAAGAAAAAGGACAGTAMTAAATGGAGAAAATTAGTAGATTTCAGAGAACTTAAGAGAACTCAAGACTTTTGGGAAGTTCAATTAGGA…
>AUT-600138740
AAAGAAGCTCTATTAGATACAGGAGCAGATGATACAGTACTAGAAGACATAAATTTGCCAGGAAAATGGAAACCAAGAATGATAGGGGGAATTGGGGGTTTYATCAAGGTAAAACAATATGAAGAGATAGATATAGAAATTTGTGGAAAAAAGGCTATAGGTACAGTATTAGTAGGACCTACACCTGTCAACATAATTGGAAGAAACATGTTGACCCAGATTGGTTGTACTTTAAATTTTGAAATGGAAAAGGAAGGRAAAATTTCAAAAATTGGGCCTGAAAATCCATACAATACCCCAATATTTGCAATAAAGAAAAAAGATAGCACTAAATGGAGAAAATTAGTAGATTTCAGAGAGCTCAAAAGAACACAAGATTTTTGGGAAGTTCAATTAGGA…
>AUT-600139103
AARGAAGCTCTATTAGATACAGGAGCAGATGATACAGTATTAGAAGACATGGATTTGCCAGGAAGATGGAAACCAAAAATGATAGGGGGAATTGGAGGTTTTATCAAAGTAAGACAGTATGATCAAATACCCATAGAAATCTGTGGACATAAAGCTATAGGTACAGTATTRRTAGGACCTACACCTGTCAACATAATTGGAAGAAATCTGTTGACTCAGATTGGTTGCACTTTAAATTTTGAAWTGGAAAAGGAAGGGAAAATTTCAAAAATTGGGCCTGAGAATCCATATAATACTCCAGTATTTGCCATAAAGAAAAAAGACAGTACTAAATGGAGAAAATTAGTAGATTTCAGAGAACTTAAGAGAACTCAAGACTTCTGGGAAGTTCAATTAGGA…
>AUT-600139106
AAAGAAGCTCTATTAGATACAGGAGCAGATGATACAGTATTAGAAGACATGGATTTGCCAGGAAGATGGAAACCAAAAATGATAGGGGGAATTGGAGGTTTTATCAAAGTAAGACAGTATGATCAGRTACCCATAGAAATCTGCGGGCATAAAGCTRTAGGTACAGTGTTAATAGGACCTACACCTGTCAACATAATTGGAAGAAATCTGTTGACTCAGCTTGGTTGCACTTTAAATTTTGAAATGGAAAAGGAAGGGAAAATCTCAAAAATTGGGCCTGAAAATCCATACAATACTCCAGTRTTTGCAATAAAGAAAAAAGACAGTACTAAATGGAGAAARTTAGTAGATTTCAGGGAACTTAAAAGAACTCAAGACTTCTGGGAAGTTCAATTAGGA…
>AUT-600139378
AAAGAAGCTCTATTAGATACAGGAGCAGATGATACAGTATTAGAAGATATAAATTTGCCAGGAAAATGGAAACCAAAAATGATAGGGGGAATTGGAGGTTTTATCAAGGTAAGRCAATATGATCAGATACTTATAGAAATTTGTGGAAAAAAGGCTATAGGTACAGTATTAGTAGGACCTACACCTGTCAACATAATTGGACGAAATATGTTGACTCAGATTGGTTGTACTTTAAATTTCGGGATGGAAGAGGAAGGAAAAATCTCAAAAATAGGGCCTGAAAACCCATACAATACTCCAGTATTTGCTATAAAGAAAAAGGAYAGCACCRAATGGAGAAAATTAGTAGATTTCAGAGAGCTCAAAAGAACTCAGGATTTTTGGGAAGTTCAATTAGGA…
>AUT-600139749
AGAGAAGCYCTATTAGACACAGGAGCAGATGATACAGTATTAGAAGAAATAGATTTACCAGGAAAATGGAAACCAAAAATGATAGGGGGAATTGGAGGKTTTATYAAAGTAAGGCAATATGATCAGATACTTATAGAAATATGTGGAAAAARGGCCATAGGTACAGTATTAGTAGGACCTACACCTGTCAACATAATTGGRCGAAATATGTTGACTCAGATTGGTTGTACTTTAAATTTTGASATGGAAAAGGAAGGAAAAATTTCAAAAATTGGGCCTGAAAATCCATACAATACTCCAGTATTTGCCATAAAGAAAAAAGATAGYACTAAATGGAGAAAATTAGTAGATTTCAGAGAACTYAAGAGAACTCAAGACTTCTGGGAGGTCCAATTAGGA…
>AUT-600210074
AAGGAAGCTCTATTAGATACAGGAGCAGATGATACAGTACTAGAAGAAATGAATTTGCCAGGAAAATGGAAACCAAAAATGATAGGGGGAATTGGAGGTTTTATCAAAGTAAGACAGTATGATCAGATACTYATAGAAATCTGTGGACATAAAGCTATAGGTACAGTATTAGTAGGACCTACACCTGTCAACATAATTGGAAGRAATCTGTTGACTCAGATTGGRTGCACTTTAAATTTTGAAATGGAAAAGGAAGGGAAAATTTCAAAAATTGGGCCTGAAAATCCATACAATACTCCAGTATTTGCCATAAAGAAAAAAGACAGTACTAAATGGAGAAAATTAGTAGATTTCAGGGAACTTAAGAGAACTCAAGACTTCTGGGAAGTTCAATTAGGA…
>AUT-600210781
AAAGAAGCTCTATTAGATACAGGAGCAGATGATACAGTATTAGAAGATATAAATTTGCCAGGAAAATGGAAACCAAAAATGATAGGGGGAATTGGAGGTTTTATCAARGTAAAACAGTATGATCAGGTAAYTATAGAAATTTGTGGAAAAAAGGCTATAGGTTCAGTMTTAGTAGGACCTACACCTGTCAACATAATTGGAAGAAATATGTTGACCCAGATTGGTTGCACTTTAAATTTCGAAATGGAAAAGGAAGGAAAAATTTCAAAAATTGGGCCTGAAAATCCATACAATACTCCAATATTTGCTATAAAGAAAAAAGACAGCACTAAATGGAGGAAATTAGTAGATTTCAGAGAGCTCAAAAGAACTCAAGACTTTTGKGAAGTYCAATTAGGA…
>AUT-600211618
AAGGAAGCTCTATTAGATACAGGAGCAGATGATACAGTATTAGAAGAAATGAATTTGCCAGGAAGATGGAAACCAAAAATGATAGGGGGAATTGGAGGTTTTATCAAAGTAAGACAATATGATCAGATACTCATAGAAATTTGTGGACATAARGCTATAGGTACAGTATTAGTAGGACCTACACCTGTCAACATAATTGGAAGAAATCTGTTGACTCAGATTGGTTGCACTTTAAATTTTGAAATGGAAAAGGAAGGGAAAATTTCAAGAGTTGGGCCTGAAAATCCATATAATACTCCAGTATTTGCCATAAAGAAAAAAGACAGTACTAAATGGAGAAAATTAGTAGAYTTCAGAGAACTTAAGAAAACTCAAGACTTCTGGGAAGTTCAATTAGGA…
>AUT-600211993
AAGGAAGCTCTATTAGATACAGGAGCAGATGACACAGTATTAGAAGAAATRAATTTGCCAGGAAAATGGAAACCAAAAATGATAGGGGGAATTGGAGGTTTTATCAAAGTRAGACAGTATGATCAGATACCCATAGAAATYTGTGGACATAAAGCTATAGGTACAGTATTAGTAGGACCTACACCTGTCAACATAATTGGAAGAAATCTGTTGACTCAGATTGGTTGTACTTTAAATTTTTTTTTGGAAGAAGAAGGAAAAATTTCAAAAATTGGGCCTGAAAATCCATATAATACTCCAGTATTTGCCATAAAGAAAAAAGACAGTACTAAATGGAGAAAAATAGTAGATTTCAGAGAACTTAAGAGAACTCAAGACTTCTGKGAAGTTCAATTAGGA…
>AUT-600212004
AAGGAAGCTCTATTAGATACAGGAGCAGATGATACAGTATTAGAAGAAATGAATTTGCCAGGAAGATGGAAACCAAAAATGATAGGGGGAATTGGAGGTTTTATCAAAGTAAGACAGTATGATCAGATACCCATAGAAATTTGTGGACATAAAGCTATAGGTACAGTATTAGTAGGACCTACACCTGTCAACATAATTGGAAGAAATCTGTTGACTCAGCTTGGTTGCACTYTAAATTTTGAAATGGAAAAGGAAGGGAAAATTTCAAAAATTGGGCCTGAAAATCCATATAATACTCCAGTATTTGCCATAAAGAAAAAAGACAGTACTAAATGGAGAAAATTAGTAGATTTCAGAGAACTTAAGAGAACTCAAGACTTTTGGGAAGTTCAATTAGGA…
>AUT-600212820
AAGGAAGCTCTATTAGATACAGGAGCAGATGATACAGTATTAGAAGAAATGAATTTGCCAGGAAAATGGAAACCAAAAATGATAGGGGGAATTGGAGGTTTTATCAAAGTAAGACAGTATGATCAGATACCCATAGAAATATGTGGACATAAAGCTATAGGTACAGTATTAGTAGGACCTACACCTGTCAACATAATTGGAAGGAATCTGTTGACTCAGATTGGTTGCACTTTAAATTTTGAAATGGAAAAGGAAGGGAAAATTTCAAGAATTGGGCCTGAAAATCCATATAATACTCCAATATTTGCCATAAAGAAAAAAGACAGTACTAAATGGAGAAAATTAGTAGATTTCAGAGAACTTAAGAAGACTCAAGACTTCTGGGAAGTTCAATTAGGA…
>AUT-600212821
AAGGAAGCTCTATTAGATACAGGAGCAGATGATACAGTATTAGAAGACATGAATTTGCCAGGAARATGGAAACCAAAAATGATAGGGGGAATTGGAGGTTTTATCAAAGTAAGACAGTATGATCAGATACCCATAGAAATTTGTGGACATAAAGCTATAGGTACGGTATTAGTAGGACCTACACCTGTCAACATAATTGGAAGAAACCTGTTGACTCAGATAGGTTGYACTTTAAATTTTGAGATGGAAAAGGAAGGAAAAATTTCAAAAATTGGGCCTGAAAATCCATACAATACWCCAGTATTTGCCATAAAGAAAAAAGACAGTRCTAAATGGAGAAAATTAGTAGATTTCAGAGAACTTAAAAGAACTCAAGACTTCTGGGAAGTTCAATTAGGA…
>AUT-600213211
AAGGAAGCTCTATTAGATACAGGAGCAGATGATACAGTATTAGAAGAAATGAATTTGCCAGGAAGATGGAAACCAAAAATGATAGGGGGAATTGGAGGTTTTATYAAAGTAAAACAGTATGATCAGATATCAGTAGAAATCTGTGGACATAAAGCTATAGGTACAGTRTTAGTAGGACCTACCCCTGTCAACATAATTGGAAGAAATCTGTTGACACAAATTGGTTGCACTTTAAATTTTGAAATGGAAAAGGAAGGGAARATTTCAAAAATTGGGCCTGACAATCCATATAATACTCCAGTATTTGCCATAAAGAAAAAAGACAGTACTAAGTGGAGAAAATTAGTAGATTTCAGAGAACTTAAGAGAACTCAAGATTTCTGGGAAGTTCAATTAGGA…
>AUT-600213258
AAGGAAGCTCTATTAGATACAGGAGCAGATGATACAGTATTAGAAGACATGAGTTTGCCAGGAAGATGGAAACCAAAAATGATAGGGGGAATTGGAGGTTTTATCAAAGTAAGACAGTATGATCAGATACCTGTAGATATCTGTGGACATAAAGCTATAGGTACAGTGTTAGTAGGACCTACACCTGTCAACATAATTGGGAGAAATCTGTTGACTCAGATTGGCTGTACTTTAAATTTTGAAATGGAAAAGGAAGGAAAAATTTCAAAAATTGGGCCTGAAAATCCATACAATACTCCAGTATTTGCAATAAGAAAAAAGGACAGTACTAAATGGAGAAAATTAGTAGATTTCAGAGAACTTAAGAGAACTCAAGACTTCTGGGAAGTTCAGTTAGGA…
>AUT-600213525
ATGGAAGCTCTATTAGATACAGGAGCAGATGATRCAGTATTAGAAGAAATAACTTTGCCAGGAAGATGGRAWCCAAAAATGATAGGGGGAATTGGAGGTTTTATCAAAGTAAAACAGTATGATCAGGTAGCCATAGAAATCTGTGGACATAAAGCTATAGGTACAGTATTAGTAGGACCTACACCTGTCAACATAATTGGAAGAAATCTGTTGACTAAGATTGGTTGCACTTTAAATTTTGAAATGGAAAAGGAAGGGAAAATTTCAAAAATTGGGCCTGAAAATCCATACAATACTCCAGTATTTGCCATAAAGAAGAAAGACAGTACTAAATGGAGGAAATTAGTAGATTTCAGAGAACTTAAGAAAACTCAAGACTTCTGGGAAGTTCAATTAGGA…
>AUT-600213721
AAGGAAGCTCTATTAGATACAGGAGCAGATGATACAGTATTAGAAGAAATGAATTTGCCAGGAAGATGGAAACCAAAAATGATAGGGGGAATTGGAGGTTTTATCAAAGTAAGACAGTATGATCAGATAGCCATAGAAATMTGTGGRCATAARGCTATAGGTACAGTATTAGTAGGACCTACACCTGTCAACATAATTGGAAGAAATCTGTTGACTCAGATTGGYTGCACTTTAAATTTTGAAATGGARAAGGAAGGGAAAATTTCAAGAATTGGGCCTGAAAATCCATATAATACTCCARTATTTGCCATAAAGAAAAARGACAGTACTAAATGGAGAAAATTAGTAGATTTCAGAGARCTTAAGAAAACTCAAGACTTCTGGGAAGTTCAATTAGGA…
>AUT-600213731
AAGGAAGCTTTATTAGATACAGGAGCAGATGATACAGTATTAGAAGAAATGCAGTTGCCAGGGAGATGGAAACCAAAAATGATAGGGGGAATTGGAGGTTTTATCAAAGTAAGACAGTATGATCAGATACTCATAGAAATTTGTGGACATAAAGCTATAGGTACAGTATTAGTAGGACCTACACCTGTCAACATAATTGGAAGAAACCTGTTGACTCAGCTTGGCTGCACTTTAAATTTTGAAATGGAAAAGGAAGGAAAAATTTCAAAAATTGGGCCTGAAAATCCATACAATACTCCAATATTTGCCATAAGGAAAAAAGACAGTACTAAATGGAGAAAATTAGTAGATTTCAGAGAACTTAAGAGAACTCAAGACTTCTGGGAAGTTCAATTAGGA…
>AUT-600216810
AAAGAAGCTCTATTAGATACAGGAGCAGATGATACAGTATTAGAAGAAATGGATTTGCCAGGGAGATGGAAACCAAAAATGATAGGGGGAATTGGAGGTTTTATCAAAGTAAGACAGTATGATCAGATACCCATAGAAATTTGTGGACATAGAGCTATAGGTACAGTATTAGTAGGACCTACACCTGTCAACATAATTGGAAGAAATCTGTTGACTCAAATTGGTTGCACTTTAAATTTTGAGATGGAAAAGGAAGGAAAAATTTCAAAAATTGGGCCTGAAAATCCATACAATACTCCAGTATTTGCCATAAAGAAAAAAGACAGTACTAAATGGAGAAAATTAGTAGATTTTAGAGAACTTAAGAAAACTCAAGACTTCTGGGAAGTTCAATTAGGA…
>AUT-600216811
AAGGAAGCTCTATTAGATACAGGAGCAGATGATACAGTATTAGAGRACATGAATTTGCCAGGAARATGGAAACCAAAAATGATAGGGGGAATTGGAGGTTTTATCAAAGTAARACAGTATGATCAGATACCCRTAGACATTTGTGGGCATAAAGCTATAGGTACAGTGTTAGTAGGACCTACACCTGTCAACATAATTGGGAGAAATCTATTGACTCAAATTGGCTGCACTTTAAATTTTGAAATGGAAAAGGAAGGAAAAATTTCAAGAATTGGACCTGAAAATCCATACAATACTCCAATATTTGCCATAAAGAAAAAAGACAGTACTAAATGGAGAAAAYTAGTAGATTTYAGAGAACTTAAGAGAACTCAAGACTTCTGGGAAATTCAATTAGGG…
>AUT-600217359
AAAGAAGCTCTATTAGATACAGGAGCAGATGATACAGTATTAGAAGACATAGATTTGCCAGGAAAATGGAAACCAAAAATGATAGGGGGAATTGGAGGTTTTATCAAGGTAAGACAGTATGATCAAATACTTATAGAAATTTGTGGAAAAAAGGCTATCGGTACGGTATTAGTAGGACCTACCCCTGTCAACATAATTGGAAGAAATATGTTGACTCAGCTTGGTTGTACTTTAAATTTTGAGATGGAAAAGGAAGGAAAAATTTCAAAAATAGGGCCTGAAAATCCATACAATACTCCAGTATTTGCTATAAAGAAAAAGGACAGCACTAAGTGGAGGAAATTAGTAGATTTCAGGGAGCTCAAGAGAACTCAGGACTTTTGGGAAGTTCAATTAGGA…
>AUT-600218302
ACAGAAGCTCTATTAGATACAGGAGCAGATGATACAGTAATAGAARACATAAATTTGCCAGGAAAATGGAAACCAGTAATGATAGGGGGAATTGGAGGCTTCGTCAAAGTAAAACAGTATGAAGAGGTACCTATAGAAATTTGTGGGAAAAAAGCTATAGGTTCAGTATTAGTAGGACCTACACCTGCCAACATAATTGGAAGAAATATATTGACCCAGATTGGYTGTACTTTAAATTTCGAATTGGAAAAGGAAGGAAAAATTTCAAAAATTGGGCCAGAAAATCCATACAATACTCCAATATTTGCTATAAAGAAAAAGAACAGCGATAGATGGAGGAAATTAGTAGATTTCAGAGAGCTCAAAAGAACTCAAGACTTTTGGGAAGTTCAATTRGGA…
>AUT-600226290
AAAGAGGCTCTCTTAGACACAGGAGCAGATGATACTGTATTAGAAGAAATAAAATTACCAGGGAATTGGAAACCAAAAATGATAGGGGGAATTGGAGGTTTTATCAAAGTAAGACAGTATGATCAAATACTTATAGAAATTTGTGGAAAAAAGGCTATAGGTACAGTACTAGTAGGACCTACACCTGTCAACATAATTGGAAGAAATATGTTGACTCAGCTTGGATGCACACTAAATTTTGATATGGAGAAGGAAGGAAAAATTTCAAAAATTGGGCCTGAAAATCCATATAACACTCCGGTATTTGCCATAAAAAAGAAGGACAGTACTAAGTGGAGAAARTTAGTAGATTTCAGGGAACTCAAAAGAACTCAAGACTTTTGGGAAGTTCAATTAGGG…
>AUT-600226546
AAGGAAGCTCTATTAGATACAGGGGCAGATGATACAGTATTAGAAGAAATGAATTTGCCAGGAAGATGGAAACCAAAAATGATAGGGGGAATTGGAGGTTTTATCAAAGTAAGACAGTATGATCAGATAGCCATAGAAATTTGTGGACATAAAGCTATAGGTACAGTATTAGTAGGACCTACACCTGTCAACATAATTGGAAGAAATCTGTTGACTCAGATTGGTTGCACTCTAAATTTTGAAATGGAAAAGGAAGGTAAAATTTCAAAGATTGGGCCTGAAAATCCATACAATACTCCAGTATTTGCCATAAAGAAAAAAGACAGTACTAAATGGAGAAAATTAGTAGATTTCAGAGAACTTAAGAAAACTCAAGACTTCTGGGAAGTTCAATTAGGA…
>AUT-600226547
AAGGAAGCTCTATTAGATACAGGAGCAGATGATACAGTATTAGAAGAAATGAATTTGCCAGGAAGATGGAAACCAAAAATGATAGGGGGAATTGGAGGTTTTATCAAAGTAAGACAATATGATCAGATACTCATAGAAATTTGTGGACATAAGGCTATAGGTACAGTATTAGTAGGACCTACACCTGTCAACATAATTGGAAGAAATCTGTTGACTMAGMTTGGTTGTACTTTAAATTTTGAAATGGAAAAGGAAGGGAAAATTTCAAGAGTTGGGCCTGAAAATCCATATAATACTCCAGTATTTGCCATAAAGAAAAAAGACAGTACTAAATGGAGAAAATTAGTGGATTTCAGAGAACTTAAGAGAACTCAAGACTTCTGGGAAGTTCAATTAGGA…
>AUT-600227562
AAGGAAGCTCTGTTAGATACAGGAGCAGATGATACAGTATTAGAAGAAATGARTTTRCCAGGAAGATGGAAACCAAAAATGATAGGGGGAATTGGAGGTTTTATCAAAGTAAGACARTATGATCAAATAGCCATAGARATYTGTGGACGGGAAGCTATAGGTACAGTATTAGTAGGACCTACACCTGTCAACATAATTGGAAGAAAYCTGTTGACTCAGATTGGTTGCACTYTAAATTTCGAAATGGAAAAGGAAGGAAAAATTTCAAAAATTGGGCCTGAAAATCCATACAATACTCCAGTGTTTGCCATAAAGAAAAAGGACAGTACTAAATGGAGAAAATTAGTAGATTTCAGAGAACTTAAAAGAACTCAAGACTTTTGGGAAGTTCAATTAGGG…
>AUT-600228161
AAAGAAGCTCTATTAGATACAGGAGCAGATGATACAGTACTAGAAGACATGGATTTGCCAGGAAGATGGAAACCAAAAATGATAGGGGGAATTGGAGGTTTTATCAAAGTAAGACAGTATGATCAGATACCCCTAGAAATCTGTGGACATAAAGTTATAGGTACAGTATTGATAGGACCTACACCTGTCAACATAATTGGAAGAAACCTGTTGACTCAGCTTGGTTGCACTTTAAATTTCGAAATGGAAAAGGAAGGGAAAATTTCAAAAATTGGGCCTGAAAATCCATACAATACTCCAGTATTTGCCATAAAGAAAAAAGACAGTACTAAATGGAGAAAATTAGTAGATTTCAGAGAACTTAAGAGAACTCAAGACTTCTGGGAAGTTCAATTAGGA…
>AUT-600228163
AGAGAAGCTCTATTAGATACAGGAGCAGATGATACAGTATTAGAAGACATAGATTTGCCAGGAAAATGGAAACCAAAAATGATAGGGGGAATTGGAGGTTTCATCAARGTAAAACAGTATGAKSAGATACTTATAGAAATTTGTGGAAAAAAGGCTATAGGTACAGTATTAGTAGGACCTACACCTGTCAACATAATTGGAAGAAACATGTTGACCCAGATTGGTTGTACTTTAAATTTTGAAATGGAAAAGGAAGGAAAAATTTCAAAAGTTGGGCCTGAAAATCCATACAATACTCCAATATTTGCAATAAAGAAAAAAGATAGCACTAAATGGAGAAAATTRGTAGACTTCAGAGAGCTCAAAAGAACACAAGACTTTTGGGAAGTKCAATTAGGA…
>AUT-600229304
AAGGAAGCTCTATTAGATACAGGAGCAGATGATACAGTATTAGAAGAAATGAATTTGCCAGGAAGATGGAAACCAAAAATGATAGGGGGAATTGGAGGTTTTATCAAAGTAAGACAGTATGATCAAATACCCATAGAAATCTGTGGAAATAAAGCTATAGGTACAGTATTAATAGGACCTACACCTGTCAACATAATTGGAAGAAATCTGTTGACTCAGATTGGTTGCACTTTAAATTTTGAAATGGAAAAGGAAGGGAAAATTTCAAAAATTGGGCCAGAAAATCCATATAATACTCCAGTATTTGCCATAAAGAAAAAAGACAGTACTAAATGGAGAAAATTAGTAGATTTCAGAGAACTTAAGAGAACTCAAGACTTCTGGGAAGTTCAATTAGGA…
>AUT-600229305
AAGGAAGCTCTATTAGATACAGGAGCAGATGATACAGTATTAGAAGACATAAATTTGCCAGGAAAATGGAAACCAAAAATGATAGGGGGAATTGGAGGTTTTATCAAAGTAAGACAGTATGATCAGATACCCATAGAAATATGTGGACATAAAGCTATAGGTACAGTATTAATAGGGCCTACACCTGTCAACATAATTGGAAGAAATCTGTTGACTCAGCTTGGTTGTACRTTAAATTTTGAAATGGAAAAGGAAGGGAAAATCTCAAAAATTGGGCCTGAAAATCCATATAATACTCCAGTATTTGCCATAAAGAAAAAAGACAGTACTAAATGGAGAAAATTAGTAGATTTCAGGGAACTTAAGAGAACTCAAGACTTCTGGGAAGTTCAGTTAGGA…
>AUT-600229306
AAGGAAGCTCTATTAGATACAGGAGCAGATGATACAGTATTAGAAGAAATGAATTTGCCAGGAAGATGGAAACCAAAAATGATAGGGGGAATTGGAGGTTTTATCAAAGTAAGACAGTATGATCAAATACTCATAGAAATCTGTGGACATAARGCTATAGGYACAGTATTAGTAGGACCTACACCTGTCAACATAATTGGAAGAAATCTGTTGACTCAGATTGGTTGCACTTTAAATTTTGAAATGGAAAAGGAAGGGAAAATTTCAAAAATTGGGCCTGAAAATCCATATAATACTCCAGTATTTGCCATAAAGAAAAAAGACAGTACTAAATGGAGAAAATTAGTAGATTTCAGAGAACTTAAGAGAACTCAAGACTTCTGGGAAGTYCAATTAGGA…
>AUT-600229397
AAGGARGCCCTATTAGATACAGGAGCAGATGATACAGTAGTRGAAGAAATGAVTTTGCCAGGAAAATGGAAACCAAAAATGATAGGGGGAATTGGAGGCTTTATTAAAGTAAGACAGTATGATCAAATACYMGTAGAAATCTATGGACATAAAGCTATAGGTACAGTATTAGTAGGACCTACACCTGTCAACATAATTGGAAGAAATTTGTTGACTCAGATTGGGTGCACTTTAAATTTTGAAATGGAAAAGGAAGGAAAGATTTCAAAAATTGGGCCTGAAAATCCATACAATACTCCAATATTTGCCATAAAGAAAAARGACAGTACTAAGTGGAGAAAATTAGTAGATTTCAGAGAACTTAAGAGAACTCAAGACTTCTGGGAGGTTCAACTAGGA…
>AUT-600231089
AAGGAAGCTCTATTAGACACAGGAGCAGATGATACAGTATTAGAAGACATGGATTTGCCAGGAAGATGGAAACCAAAAATGATAGGGGGAATTGGAGGTTTTATCAAAGTAAGACAGTATGATCAGATACCCATAGAAATCTGTGGGCATAAAGCAATAGGCACAGTGTTAGTAGGACCTACACCTGTCAACATAATTGGAAGAAATCTGTTGACTCAGCTTGGTTGCACTTTAAATTTTGAAATGGAAAAGGAAGGAAAAATTTCAAGAATTGGGCCTGAAAACCCATACAATACTCCAGTGTTTGCCATAAAGAAAAAAGACAGTACTAAGTGGAGAAAATTAGTAGATTTCAGAGAACTTAAAAGAACTCAAGACTTCTGGGAAGTTCAATTAGGA…
>AUT-600231425
AAGGAAGCTCTATTAGATACAGGAGCAGATGATACAGTATTAGAAGAAATGAATTTGCCAGGAAGATGGAAACCAAAAATGATAGGGGGAATTGGAGGTTTTATTAAGGTAAGACAGTATGATCAAATAATCATAGAAATCTGTGGACATAAAGCTGTAGGTACAGTATTAGTAGGACCTACACCTGTCAACATAATTGGCAGAAATCTGTTGACTCAGATTGGTTGCACTTTAAATTTTGAAATGGAAAAGGAAGGAAAAATTTCAAAAATTGGGCCTGAAAATCCATACAATACTCCAGTATTTGCTATAAAGAAAAAAGACAGTACAAAATGGAGAAAATTAGTAGATTTTAGAGAACTTAAGAAAACTCAGGACTTCTGGGAAGTTCAATTAGGA…
>AUT-600233626
AAAGAAGCTCTATTAGATACAGGAGCAGATGATACAGTATTAGAAGATATAAATTTGCCAGGAAAATGGAAACCAAAAATGATAGGGGGAATTGGAGGTTTTATCAAGGTAAGGCAATATGATCAGATACTTATAGAAATTTGTGGAAAAAAGGCTATAGGTACAGTGTTAGTAGGACCTACACCTGTCAACATAATTGGACGAAAYATGTTGACTCAGATTGGTTGTACTTTAAATTTCGAGATGGAAGAGGAAGGAAAAATCTCAAAAATTGGGCCTGAAAATCCATACAATACTCCAATATTTGCTATAAAGAAAAAGGATAGCACCAAATGGAGAAAAYTAGTAGATTTTAGAGAGCTCAAAAGAACTCAGGACTTTTGGGAAGTTCAATTAGGA…
>AUT-600233631
AAGGAAGCTCTATTGGATACAGGAGCAGATGATACAGTATTAGAAGAAATGAATTTGCAAGGAAAATGGAAACCAAAAATGATAGGGGGAATTGGAGGTTTTATCAAAGTAAGGCAGTATGATCAGATACCCATAGAAATCTGTGGACATAAAACTATAGGTACAGTATTAGTAGGACCTACACCTGTCAACATAATTGGAAGAAATMTGTTGACTCAGCTTGGTTGCACTCTAAATTTTGAAATGGAAAAGGAAGGAAAAATTTCAAAAATTGGGCCTGAAAATCCATACAATACTCCAGTATTTGCCATAAAGAAAAAAGACAGTACTAAATGGAGAAAATTAGTAGACTTCAGGGAACTTAAGAAAACTCAAGATTTCTGGGAAGTTCAATTAGGA…
>AUT-600233972
AAGGAGGCTCTCTTAGACACAGGAGCAGATGATACAGTATTAGAAGAAATAAATTTGCCAGGAAAATGGAAACCAAAAATGATAGGAGGAATTGGAGGTTTTATTAGAGTAAGACAGTATGATCAAATACTTATAGAAATTTGTGGGAAAAAGGCTATAGGTACAGTACTAGTAGGACCCACACCTGTCAACATAATTGGAAGAAACATGTTGACCCAGCTTGGATGCACACTAAATTTTGAGATGGAAAAGGAAGGAAAAATTTCAAAAATTGGGCCTGAAAATCCATATAACACTCCAGTATTTGCCATAAAAAAGAAGGACAGTACTAAGTGGAGAAAATTAGTAGATTTCAGGGAACTCAAAAGAACTCAAGACTTTTGGGAAGTTCAATTAGGG…
>AUT-600234684
ARAGAAGCTCTATTAGATACAGGAGCAGATGATACAGTATTAGAAGACATAAATTTGCCAGGAAAATGGAAACCAAGAATGATAGGGGGAATTGGAGGTTTYATCAAAGTAAAACAGTATGATCAGATACCTATAGAAATTTGTGGAAAAAAGGCTATAGGTACAGTATTGGTAGGACCTACACCTGTCAACATAATTGGAAGAAATATGTTGACCCAGCTTGGTTGTACTTTAAATTTTGAAATGGAAAAGGAAGGAAAAATCTCAAAAATTGGGCCTGAAAATCCATACAATACTCCAATATTTGCTATAAAGAAAAAAGACAGCACTAAATGGAGAAAATTAGTAGATTTCAGAGAGCTCAAAAGAACTCAAGACTTTTGGGAAGTTCAATTAGGA…
>AUT-600234685
AAGGAAGCTCTATTAGATACAGGAGCAGATGATACTGTATTAGAAGAAATAGATTTGCCAGGAAGATGGAGACCAAAAATGATAGGGGGAATTGGAGGTTTTATCAAAGTAAAACAGTATGATCAAATACCCATAGAAATCTGTGGAAAAAAGACTATAGGTACAGTTTTAGTRGGACCTACACCTGTCAACATAATTGGAAGAAATCTGTTGACTCAGMTTGGYTGCACTTTAAATTTTGAAATGGAAAAGGAAGGAAAAATTTCAAAAATTGGGCCTGAAAATCCATATAATACTCCAGTGTTTGCCATAAAGAAAAAGAACAGTACTAGCTGGAGAAAATTAGTAGATTTCAGAGAACTTAAGAGAACTCAAGATTTCTGGGAAGTTCAACTAGGA…
>AUT-600238698
AGGGAAGCTCTATTAGATACAGGAGCAGATGATACAGTATTAGAAGAAATAAATTTGCCAGGAAGATGGAAACCAAAAATGATAGGGGGAATTGGAGGTTTTATCAAAGTAAGACAGTATGATCAAATACCCATAGAAATCTGTGGAAAAAGGGCTATAGGTACAGTWTTAGTAGGACCYACACCTGTCAACATAATTGGAAGAAATCTGTTGACTCAGCTTGGTTGCACTTTAAATTTTGAAATGGAAAAGGAAGGGAAAATTTCAAAAATTGGGCCTGAAAAYCCATAYAATACTCCAGTATTTGCCATAAAGAAAAARGACAGTACTAAATGGAGAAAATTAGTAGATTTYAGRGAACTTAAGAAGACTCAGGAYTTCTGGGAAGTTCAATTAGGA…
>AUT-600238904
AAGGAAGCKCTATTAGATACAGGAGCAGATGATACAGTATTAGAAGAAATAAATTTGCCAGGAAGATGGAAACCAAAAATGATAGGGGGAATTGGAGGTTTTATCAAAGTAAGACAGTATGATCAAATAGCCATAGAAATCTGTGGGCATAAAGCTATAGGTACAGTATTAGTAGGACCTACACCTGTCAACATAATTGGAAGAAATCTGTTGACTCAGATTGGTTGYACTTTAAATTTTGAAATGGAAAAGGAAGGGAAAATTTCAAARATTGGGCCTGAAAATCCATATAATACTCCAATATTTGCCATAAAGAAAAAAGACAGTACTAARTGGAGAAAATTAGTAGATTTCAGGGAACTTAAGAAAACTCAAGACTTCTGGGAAGTTCAATTAGGA…
>AUT-600238925
AAGGAAGCTCTATTAGATACAGGAGCAGATGATACAGTATTAGAAGACATGAGTTTGCCAGGAAGATGGAAACCAAAAATGATAGGRGGAATTGGAGGTTTTATCAAAGTAAGACAGTATGATCAGACACCCCTTGAAATCTGTGGACATAAAGTTATAGGTACAGTATTAGTAGGACCTACACCTGTCAACATAATTGGAAGAAATCTGTTGACTCAGCTTGGTTGCACTTTAAATTTTGAAATGGAAAAGGAAGGAAAAATTTCAAAAATTGGGCCTGAGAATCCATACAATACTCCAGTATTTGCTATAAAGAAAAAAGACAGTACTAAATGGAGAAAATTAGTAGATTTTAGAGAACTTAAGAGAACTCAAGACTTCTGGGAAGTTCAATTAGGA…
>AUT-600238928
AAGGAAGCTCTATTAGATACAGGAGCAGATGATACAGTAYTAGAAGAAATGAATTTGCCAGGAAGATGGAARCCAAAAATGATAGGRGGAATTGGAGGTTTTATCAAAGTAAGACAGTATGATCAAATATCTGTAGAAATCTGTGGACATAAAGCTATAGGTACAGTATTAGTAGGACCTACACCTGTCAACATAATTGGAAGAAATCTGTTGACTCAGATTGGCTGCACTYTAAATTTTGAAATGGAAAAGGAAGGGAAAATTTCAAAAATTGGGCCTGAAAATCCATATAATACTCCAGTATTTGCCATAAAGAAAAAAGATAGTTCTAAATGGAGAAAGCTAGTAGATTTCAGAGAACTTAAGAAAACTCAAGACTTCTGGGARGTTCAATTAGGA…
>AUT-600239120
AAGGAAGCTCTATTAGATACAGGAGCAGAYGATACAGTATTAGAAGATATGGAGTTGCCAGGAAGATGGAGACCAAAAATGATAGGGGGAATTGGAGGTTTTATCAAAGTAAGACAGTATGATCAARTACCCATAGAAATCTGTGGRCATAAAGCTATAGGTACAGTATTAGTAGGACCTACACCTGTCAACATAATTGGAAGAAATCTGTTGACTAAGATTGGTTGCACTTTAAATTTTGAAATGGAAAAGGAAGGGAAAATTTCAAAAATTGGGCCTGAAAACCCATATAATACTCCAGTATTTGCCATAAAGAAAAAGGACAGTACTAAATGGAGAAAATTAGTAGAYTTCAGAGAACTTAAGAAAACTCAAGACTTYTGGGAGGTTCAATTAGGA…
>AUT-600239869
AAGGAAGCTCTGTTAGATACAGGAGCAGATGATACAGTATTAGAAGAAATGAATTTGCCAGGAAAATGGAAACCAAAAATGATAGGGGGAATTGGAGGTTTTATCAAAGTAAGACAGTATGATCAGGTACTCATAGAAATCTGTGGACATAAAGCTATAGGTACAGTATTAATAGGACCTACACCTGTCAACATAATTGGAAGAAATCTGTTGACTCAGCTTGGTTGCACTTTAAATTTTGAAATGGAAAAGGAAGGRAAAATTTCAAAAATTGGGCCTGAAAAYCCATATAATACTCCAGTATTTGCTATAAAGAAAAAAGACAGTACTAAATGGAGAAAATTAGTAGATTTCAGAGAACTTAAGAAAACTCAAGACTTCTGGGAAGTTCAATTAGGR…
>AUT-600240916
AAGGAAGCTCTCTTAGATACAGGAGCAGATGATACAGTATTAGAAGAAATGAATTTGCCAGGGAAATGGAAACCAAAAATGATAGGGGGAATTGGAGGTTTTATCAAAGTAAGACAGTATGATCAGATAVYCATAGAAATCTGTGGACATAGAGCTATAGGTACAGTATTAGTAGGACCTACACCTGTCAACATAATTGGAAGAAATCTGTTGACTCAGCTTGGTTGCACTTTAAATTTTGAAATGGAAAAGGAAGGGAAAATTTCAAAAATTGGGCCTGAAAATCCATACAATACTCCAGTCTTTGCCATAAAGAAAAAAGATAGTACTAAATGGAGAAAATTAGTAGATTTCAGAGAACTTAAGAGRACTCAAGACTTCTGGGAAGTTCAATTAGGA…
>AUT-600242308
AAGGAAGCTCTCTTAGACACAGGAGCAGATGATACAGTATTAGAAGAATTAARTTTACCAGGAAAATGGAAACCAAAAATGATAGGAGGAATTGGAGGTTTTATCAAAGTAAGACAATATGATCAAATASTTATAGAAAYTTGTGGAAAAAGRGCTATAGGTACAGTATTAGTAGGGCCTACACCTGTCAATATAATTGGAAGAAAYATATTGACTCAGCTTGGATGCACMCTAAATTTTGAAATGGAAAAGGAAGGAAAAATTACAAAAATTGGGCCTGAAAACCCATATAACACTCCAGTATTTGCCATAAAAAAGAAGGACAGTACTAAGTGGAGAAAATTAGTAGATTTCAGGGAGCTCAAAAGAACTCAAGACTTTTGCGAGGTTCAATTAGGA…
>AUT-600242314
AGGGAGGCTCTCTTAGACACAGGAGCAGATGATACAGTATTAGAAGACATAAATTTGCCAGGAAAATGGAAACCAAAAATGATAGGAGGAATTGGAGGTTTTATCAAAGTAAGACAGTATGATCAAATATCTATAGAAATTTGTGGAAAAAAGGCTATAGGAACAGTATTAGTAGGACCTACACCTGTCAACATAATTGGAAGAAATATGTTGACTCAGCTTGGATGTACACTAAATTTTGAAATGGAGAAGGAAGGAAAAATTACAAAAATTGGGCCTGAAAATCCATATAATACTCCAGTATTTGCCATAAAAAAGAAGGATAGTACTAAGTGGAGAAAATTAGTAGATTTCAGGGAACTCAAGAGAACTCAGGACTTTTGGGAGGTCCAGTTAGGA…
>AUT-600243854
AAAGAAGCTCTATTAGATACAGGAGCAGATGATACAGTATTAGAAGACATAARTTTRCCAGGAAAATGGAAACCAAAAATGATAGGGGGAATTGGAGGTTTTATYAARGTAAGACARTATGATCAGATACTTATAGAAATYTGTGGAAAAARGGCYATMGGTACRGTATTAGTAGGACCTACMCCTGTCAACATAATTGGAAGAAACATGTTGACTCAGMTTGGTTGTACTTTAAATTTTGARATGGAAAAGGAAGGAAAGATTTCAAGAATTGGGCCTGAAAATCCATAYAAYACTCCARTATTTGCYATAAAGAAAAAAGACAGYACTAARTGGAGRAAATTRGTAGATTTCAGRGAGCTCAAAAGAACTCAGGACTTYTGGGAGGTYCAATTRGGA…
>AUT-600243945
AAGGAAGCTCTATTAGATACAGGAGCAGATGATACAGTATTAGAAGACATGAGTTTGCCAGGAAGATGGAAACCAAAAATGATAGGGGGAATTGGAGGTTTTATCAAAGTAAGACAGTATGATCAGATACCTGTAGAAATCTGTGGACATAAAGCTATAGGTACAGTATTAGTAGGACCTACACCTGTCAACATAATTGGAAGAAATCTGTTGACTCAGATTGGCTGCACTCTAAATTTTGAAATGGAAAAGGAAGGAAAGATTTCAAAAATTGGGCCTGAAAATCCATACAATACTCCAGTATTTGCCATAAAGAAAAAAGACAGTACTAAATGGAGAAAATTAGTAGATTTCAGAGARCTTAAGAGAACTCAAGACTTYTGGGAAGTTCAATTAGGA…
>AUT-600245072
ATAGAAGCCCTATTAGACACAGGGGCAGATGATACAGTATTGGAAGAAATAAATTTACCAGGAAAATGGAAACCAAAAATGATAGGGGGAATTGGAGGTTTTATCAARGTAAGACAATATGATCAAATACYTATAGAAATTTGTGGAAAAAGGGCCATAGGTACAGTATTAGTAGGACCTACACCTGTCAACATAATTGGACGAAATATGTTGACTCAGATTGGTTGTACTTTAAATTTTGAGATGGAAAAGGAAGGAAAAATTTCAAAAATTGGGCCTGAAAAYCCATATAATACTCCAATATTTGCCATAAAGAAAAAAGATAGTACTAAATGGAGAAAATTAGTAGATTTCAGAGAACTCAARAGAACTCAAGACTTCTGGGAGGTCCAATTAGGA…
>AUT-600245867
AAGGAAGCTCTATTAGATACAGGAGCAGATGATACAGTATTAGAAGACATGGATTTACCAGGAAGATGGAGACCAAAAATGATAGGGGGAATTGGAGGTTTTATCAAAGTAAGACAATATGATGAGATACCCATAGAAATTTGTGGACATAAAACTATAGGTACAGTATTAGTAGGACCTACACCTGTCAACATAGTTGGAAGAAACCTGTTGACTCAGATTGGTTGCACTTTAAATTTTGAAATGGAAAAGGAAGGAAAAATTTCAAAAATTGGGCCTGAAAATCCATACAATACTCCAGTATTTGCCATAAAGAAAAAAGACAGTACTAAATGGAGAAAATTAGTAGATTTCAGGGAACTTAAGAAAACTCAAGACTTCTGGGAAGTTCAATTAGGA…
>AUT-600247094
AAAGAAGCTTTATTAGATACAGGAGCAGATGATACAGTATTAGAAGACATGAATTTGCCAGGAAGATGGAAACCAAAAATGATAGGGGGAATTGGAGGTTTTATCAAAGTAAAACAGTATGATCAAGTACCCATAGAAATTTGTGGACATAAAGCTATAGGTACAGTATTAATAGGACCTACACCTGTCAACATAATTGGAAGAAATCTGTTGACTCAGCTCGGTTGCACTTTAAATTTTGAAATGGAAAAGGAAGGAAAAATTTCAAAGATTGGGCCTGAGAATCCATACAATACTCCARTATTTGCCATAAAGAAAAAAGACAGTACTAAATGGAGAAAATTAGTAGATTTCAGAGAACTTAAGAGAACTCAAGAYTTYTGGGAAGTTCAATTRGGA…
>AUT-600249810
AAAGAAGCTCTATTAGATACAGGAGCAGATGATACAGTGTTAGAAGATATAAATTTGCCAGGAAAATGGAAACCAAAAATGATAGGGGGAATTGGAGGTTTTATCAARGTAAAACAGTATGAYCAAATACTTATAGAAATTTGTGGAAAGAAGGCTATAGGTACAGTATTAGTAGGACCTACACCTGTCAACATAATAGGAAGRAACATGTTGACTCAGATTGGYTGTACTTTAAATTTTGRGATGGARAAGGAAGSAAARATTTCAAAAATTGGGCCTGMAAAYCCATACAATACTCCAGTATTTGCTATAAAGAAAAARGATAGCACTAAATGGAGAAAGYTAGTAGATTTTAGAGARCTCAAAAGAACTCAGGATTTCTGGGAAGTTCAATTAGGA…
>AUT-600250311
AAAGAAGCTCTATTAGATACAGGAGCAGATGATACAGTATTAGAAGAAATGGATTTGCCAGGAAGATGGAAACCAAAAATGATAGGGGGAATTGGAGGTTTTATCAAAGTAAGACARTATGATCAGGTACCCATAGAAATCTGTGGGCATAAAGCWATAGGTACAGTRTTAATAGGACCTACACCTGTCAACATAATTGGAAGAAATCTGTTGACTCAGCTTGGTTGCACTTTAAATTTTGAAATGGAAAAGGAAGGRAAAATCTCAAGAATTGGGCCTGAAAATCCATACAATACTCCAGTATTTGCAATAAAGAAAAAAGACAGTACTAAATGGAGAAAATTAGTAGATTTCAGGGAACTTAAAAGAACTCAAGACTTCTGGGAAGTTCAATTAGGA…
>AUT-600250972
AAGGAAGCTCTATTAGATACAGGAGCAGATGATACAGTATTAGAAGAAATGAATTTGCCAGGAAAATGGAAACCAAAAATGATAGGGGGAATTGGAGGTTTTATCAAAGTAAGACAGTATGAGCAGATACCCATAGAAATCTGTGGACATAAAGCTATAGGTACAGTGTTAATAGGACCTACACCTGTCAACATAATTGGAAGAAATCTGTTGACTCAGCTTGGTTGCACGTTAAATTTTGAAATGGAAAAGGAAGGAAAAATCTCAAAAATTGGGCCTGAAAATCCATACAATACTCCAGTATTTGCCATAAAGAAAAAAGACAGTACTAAATGGAGAAAATTAGTAGATTTTAGGGAACTTAAGAGAACTCAAGACTTTTGGGAAGTTCAATTAGGA…
>AUT-600250982
AAGGAAGCTCTATTAGATACAGGAGCAGATGATACAGTATTAGAGGACATGAAYTTGCCAGGAAGATGGAAACCAAAAATGATAGGGGGAATTGGAGGTTTTATCAAAGTAARACAGTATGATCAGATACCCATAGACATTTGTGGGCATAAAGCTATAGGTACAGTGTTAGTAGGACCTACACCTGTCAACATAATTGGGAGAAATCTATTGACTCAAATTGGCTGCACTTTAAATTTTGAAATGGAAAAGGAAGGAAAAATTTCAAGAATTGGACCTGAAAATCCRTAYAATACTCCAATATTTGCCATAAAGAAAAAAGACAGTACTAAATGGAGAAAATTAGTAGATTTCAGAGAACTTAAGAGAACTCAAGACTTCTGGGAAATTCAATTAGGG…
>AUT-600251598
AAGGAAGCTCTATTAGATACAGGAGCAGATGATACAGTATTAGAAGAAATGAATTTGCCAGGAARATGGAAACCAAAAATGATAGGGGGAATTGGAGGYTTTATCAAAGTAAGACAGTATGATCAGGTACACATAGAAATYTGTGGACATAAAGCTATAGGTACAGTATTAGTAGGACCTACACCTGTCAACATAATTGGAAGAAATCTGTTGACTCAGATTGGGTGCACTTTAAATTTTGAAATGGAAAAGGAAGGRAAAATTTCAAAAATTGGGCCTGAAAATCCATACAATACTCCAGTATTTGCCATAAAGAAAAAAGACGGYACTAAATGGAGAAAATTAGTAGATTTCAGAGAACTTARGAAAACTCAAGACTTCTGGGARGTTCAATTAGGA…
>AUT-600253570
AAGGAAGCTYTGTTAGATACAGGAGCAGATGATACAGTATTAGAAGAAATGAATTTGCCAGGAAAATGGAAACCAAAAATGATAGGGGGAATTGGAGGTTTTATCAAAGTAAGACAGTATGATCAGATACTCATAGAAATCTGTGGACATAAAGCTATAGGTACAGTATTAGTAGGACCTACACCTGTTAACATAATTGGAAGAAATCTGTTGACTCAGATTGGTTGCACTTTAAATTTTGAAATGGAAAAGGAAGGGAAAATTTCAAGAATTGGGCCTGAAAATCCATATAATACTCCAGTRTTTGCCATAAAGAAAAAAGACAGTACKAAATGGAGAAAATTAGTGGATTTTAGAGAACTTAAGAAAACTCAAGACTTCTGGGAAGTTCAATTAGGA…
>AUT-600255222
AAGGAAGCCCTATTAGATACAGGAGCAGATGATACAGTATTAGAAGAAATRAATTTGCCAGGAAGATGGAAACCAAAAATGATAGGGGGAATTGGAGGTTTTATCAAAGTAAGAGAGTATGATCAGGTAACCATTGAAATCTGTGGGAAAAAAGTTATAGGTACAGTATTAGTAGGACCTACACCTGTCAACATAATTGGAAGAAACTTGTTGACTCAGCTTGGTTGCACTTTAAATTTTGAAATGGAAAAGGAAGGGAAAATTTCAAAAATTGGGCCTGAAAATCCATACAATACTCCAGTATTTGCMATAAAGAAAAAAGACAGTACTAAATGGAGAAAATTAGTAGATTTCAGGGAACTTAAGAGAACTCAAGAYTTCTGGGAAGTTCAATTAGGA…
>AUT-600256256
AAGGAAGCTCTATTAGATACAGGAGCAGATGAYACAGTRTTAGAAGAAATGARTTTGCCAGGAAGATGGAAACCAAAAATGATAGGAGGAATTGGAGGTTTTATCAAAGTAAGACAGTATGATCAGATACTCGTAGAAATCTGTGGACATAAAGCTATAGGTACAGTATTAGTAGGACCTACACCTGTCAACATAATTGGAAGAAATCTGTTGACTCAGCTTGGCTGTACTTTAAATTTTGAAATGGAAAAGGAAGGAAAAATTTCAAAAATTGGGCCTGAAAACCCATACAATACTCCAATATTTGCCATAAAGAAAAAAGATAGTACTAAATGGAGAAAATTAGTAGATTTCAGAGAACTTAAGAGAACTCAAGACTTCTGGGAAGTTCAATTAGGA…
>AUT-600256260
AAGGAAGCTCTATTAGATACAGGAGCAGATGATACAGTATTAGAAGAAATAAATTTGCCAGGAAGATGGAAACCAAAAATGATAGGGGGAATTGGAGGTTTTATCAAAGTAAGACAGTATGATCAGATACCCATAGAAATCTGTGGACATAAAGCTATAGGTACAGTATTAGTAGGACCTACACCTGTCAACATAATTGGAAGAAACTTGTTGACTCAGATTGGCTGCACTTTAAATTTTGAAATGGAAAAGGAAGGAAAAATTTCAAAAATTGGGCCTGAAAATCCATACAATACTCCAGTATTTGCTATAAAGAAAAAGGACAGTACTAAATGGAGAAAATTAGTAGAYTTCAGAGARCTTAAGAAAACTCAAGACTTCTGGGAAGTTCAATTAGGA…
>AUT-600256802
AAAGAAGCTCTATTAGATACAGGAGCAGATGATACAGTATTAGAAGATATAAATTTGCCAGGAAAATGGARACCAAAAATGATAGGGGGAATTGGAGGTTTTATCAAAGTAAGGCAATATGATCAGATACTTATAGAAATTTGTGGAAAAAAGGCTATAGGTACAGTATTAGTAGGACCTACACCTGTCAACATAATTGGACGAAATATGTTGACTCAGATTGGGTGTACTTTAAATTTCGAGATGGAAGAGGAAGGAAAAATCTCAAAAATTGGGCCTGAAAATCCATACAATACTCCAGTATTTGCCATAAAGAAAAAGGACAGCACCAAATGGAGGAAATTAGTAGATTTCAGAGAGCTTAAAAGAACTCAGGACTTTTGGGAAGTTCAATTAGGA…
>AUT-600259469
AGGGAAGCTCTATTAGACACAGGAGCAGATGATACAGTATTAGAAGACATRGATTTGCCAGGAAGATGGAAACCAAAAATGATAGGGGGAATTGGAGGTTTTATCAAAGTAARACAGTATGATCAGATACCCATAGAAATCTGTGGGCATAAAGCAGTAGGCACAGTGTTAGTAGGACCTACACCTGTCAACATAATTGGAAGAAATCTGTTGACTCAGCTTGGTTGCACTTTAAATTTTGAAATGGAAAAGGAAGGAAAAATTTCAAGAATTGGGCCTGAAAACCCATACAATACTCCAGTGTTTGCCATAAAGAAAAAAGACAGTACTAAGTGGAGAAAATTAGTAGATTTCAGAGAACTTAAGAGAACTCAAGACTTCTGGGAAGTTCAATTAGGA…
>AUT-600260248
AAAGAAGCTTTATTAGATACAGGAGCAGATGATACAGTATTAGAAGAAATGAATTTGCCAGGAAAATGGAAACCAAAGATGATAGGGGGAATTGGAGGTTTTATCAAAGTAAGACAGTATGATCAAATACTYATAGAAATCTGTGGACATAAAGCTATRGGTACAGTATTAATAGGACCTACACCTGTCAACATAATTGGAAGAAATCTGTTGACTCAGATTGGTTGCACTTTAAATTTYGAAATGGAAAAGGAAGGGAAAATTTCAAAAATTGGGCCTGAAAATCCATATAATACTCCAGTATTTGCTATAAAGAAGAAAGAYAGTACTAAATGGAGAAAATTAGTAGATTTCAGAGAGCTCAAGAAAACTCAAGACTTCTGGGAAGTYCAGTTAGGA…
>AUT-600260249
AAGGAAGCTCTATTAGATACAGGAGCAGATGATACAGTATTAGAAGAAATGAGTTTGCCAGGGAGATGGAAACCAAAAATGATAGGAGGAATTGGAGGTTTTATCAAAGTRAGACAGTATGATCAGATACCTATAGAAATCTGYGGACATAAAGCTATAGGTACAGTATTAGTAGGACCTACACCTGTCAACATAATTGGAAGAAATCTGTTGACTCAGATTGGCTGCACTCTAAATTTTGAAATGGAAAAGGAAGGAAAAATTTCAAAAATTGGGCCTGAAAATCCATACAATACTCCAGTATTTGCCATAAAGAAAAAAGATGGTACTAAATGGAGAAAGTTAGTAGATTTTAGAGAACTTAAAAGAACTCAAGACTTTTGGGAGGTTCAATTAGGA…
>AUT-600263138
[truncated: 16,007 more rows]
